# Supplementary material for: Development of a 1,2,4-Triazole-Based Lead Tankyrase Inhibitor: Part II
Source: PubMed Central journal article supplement (PMC8713164; doi:10.1021/acs.jmedchem.1c01264), 2021-12-08
Supplement: jm1c01264_si_002.pdf [file jm1c01264_si_002.pdf]

# Development of a 1,2,4-Triazole Based Lead Tankyrase Inhibitor – Part-II

Ruben G. G. Leenders,<sup>§,#</sup> Shoshy Alam Brinch,<sup>†,‡,#</sup> Sven T. Sowa,<sup>†</sup> Enya Amundsen-Isaksen,<sup>†,‡</sup> Albert Galera-Prat,<sup>†</sup> Sudarshan Murthy,<sup>†</sup> Sjoerd Aertssen,<sup>§</sup> Johannes N. Smits,<sup>§</sup> Piotr Nieczyppor,<sup>§</sup> Eddy Damen,<sup>§</sup> Anita Wegert,<sup>§</sup> Marc Nazaré,<sup>||</sup> Lari Lehtiö,<sup>†</sup> Jo Waaler,<sup>†,‡,#</sup> and Stefan Krauss<sup>†,‡,#,\*</sup>

<sup>§</sup>Symeres, Kerkenbos 1013, 6546 BB Nijmegen, the Netherlands

<sup>†</sup>Hybrid Technology Hub - Centre of Excellence, Institute of Basic Medical Sciences, University of Oslo, 0317 Oslo, Norway

<sup>‡</sup>Department of Immunology and Transfusion Medicine, Oslo University Hospital, 0424 Oslo, Norway

<sup>†</sup>Faculty of Biochemistry and Molecular Medicine, Biocenter Oulu, University of Oulu, 90014 Oulu, Finland

<sup>||</sup> Medicinal Chemistry, Leibniz-Forschungsinstitut für Molekulare Pharmakologie (FMP), Campus Berlin Buch, Robert-Roessle-Str. 10, 13125, Berlin, Germany

\* Corresponding author; phone: +47 97610063; Email: [stefan.krauss@medisin.uio.no](mailto:stefan.krauss@medisin.uio.no).

# R.G.G.L. and S.A.B. contributed equally to this article while J.W. and S.K. contributed equally as co-senior authors of this article.

## Contents

|          |                                                                                                                                       |
|----------|---------------------------------------------------------------------------------------------------------------------------------------|
| Page S2  | Synthetic Organic Procedures                                                                                                          |
| Page S17 | Spectra of final products                                                                                                             |
| Page S81 | Figure S-1: Dose response curves of compound <b>24</b> (OM-153) for TNKS1 and -2                                                      |
| Page S82 | Table S-1: Inhibition of PARPs                                                                                                        |
| Page S82 | Chart S-1: Selected compounds from our previous paper <sup>1</sup>                                                                    |
| Page S83 | Table S-2: Data collection and refinement statistics for the cocrystal structure of TNKS2 in complex with compound <b>24</b> (OM-153) |

# Synthetic Organic Procedures

## General Methods

All starting materials and dry solvents were commercially obtained. Reactions were performed under an inert atmosphere of nitrogen when necessary. Microwave reactions were carried out in sealed vials. Column chromatography was carried out on silica gel cartridges (40  $\mu\text{m}$  irregular), and TLC analysis was performed on silica gel 60 F254 plates.

**NMR.** NMR spectra were recorded in chloroform-*d*, unless otherwise stated, on a 400 MHz spectrometer with tetramethylsilane as internal standards. Coupling constants are given in Hz.

**LC/MS.** LC/MS chromatograms mass spectra were recorded using electrospray ionization in positive or negative ionization mode on Agilent 1260 Bin: pump, G1312B, degasser; autosampler; ColCom; DAD G1315C; MSD G6130B ESI; eluent A, acetonitrile; eluent B, 10 mM ammonium bicarbonate in water (base mode) or 0.1% formic acid in water (acid mode).

**HRMS.** HRMS spectra were recorded with a LC-MS Q Exactive Focus high resolution mass spectrometer (Thermo Scientific). Calibration: With the Pierce calibration solutions containing 1-butylamine, caffeine, MRFA and Ultramark 1621 (positive mode) and the Pierce calibration solution containing sodium dodecyl sulfate, sodium taurocholate, and Ultramark 1621 (negative mode). Analysis: 1  $\mu\text{l}$  of a 10  $\mu\text{g}/\text{ml}$  sample in MeCN/DMSO 99/1 is injected and data is acquired under full MS mode (resolution 70000 FWHM at 200 Da) over the mass range  $m/z$  of 150 – 2000. Standard ESI conditions compatible with the flow rate are applied: spray voltage 3.5 kV, auxiliary gas heater temperature 463°C, capillary temperature 280°C, sheath gas 58, auxiliary gas 16, sweep gas 3, S-lens RF level 50. Mass scan range is 150 – 2000  $m/z$ . Mass resolution is set at 70000 (< 3 ppm mass accuracy). Data are evaluated using Xcalibur Qual Browser version 4.2.47 (Thermo Fisher).

**GC/MS.** Agilent 6890N, injection S/SL; injector 7683. MS: 5973 MS, EI-positive; carrier gas He.

**Analytical SFC.** Waters UPC2, Bin pump ACQ-ccBSM; autosampler, column manager; PDA ACQ-PDA; QDA and isocratic pump ACQ-ISM. Phenomenex Amylose-1 (100 mm  $\times$  4.6 mm, 5  $\mu\text{m}$ ); column temp 35 °C; flow 2.5 mL/min; BPR 170 bar; eluent A, CO<sub>2</sub>; eluent B, MeOH + 20 mM ammonia. Linear gradient: t = 0 min 5% B, t = 5 min 50% B; t = 6 min 50% B. Detection: PDA (210–320 nm).

**Preparative SFC.** Waters Prep 100 SFC UV/MS directed system; Waters 2998 photodiode array (PDA) detector; Waters Acquity QDa MS detector; Waters 2767 sample manager. Columns: Phenomenex Lux Amylose-1 (250 mm  $\times$  21 mm, 5  $\mu\text{m}$ ), Phenomenex Lux Cellulose-1 (250 mm  $\times$  21.2 mm, 5  $\mu\text{m}$ ), Phenomenex Lux Cellulose- 2 (250 mm  $\times$  21.2 mm, 5  $\mu\text{m}$ ), Diacel Chiralpak IC for SFC (250 mm  $\times$  20 mm, 5  $\mu\text{m}$ ); column temp 35 °C; flow 70 mL/min; ABPR 120 bar; eluent A, CO<sub>2</sub>; eluent B, 20 mM ammonia in methanol. Linear gradient: t = 0 min 10% B, t = 5 min 50% B; t = 7.5 min 50% B. Detection: PDA (210–400 nm). Fraction collection is based on PDA TIC.

**MPLC.** Base: Preparative base XSelect. Instrument type: Reveleris prep MPLC; column, Waters XSelect CSH C18 (145 mm  $\times$  25 mm, 10  $\mu\text{m}$ ); flow 40 mL/min; column temp, room temperature; eluent A, 10 mM ammonium bicarbonate in water (pH = 9.0); eluent B, 99% acetonitrile + 1% 10 mM ammonium bicarbonate in water. Gradient: t = 0 min 5% B, t = 1 min 5% B, t = 2 min 30% B, t = 17 min 70% B, t = 18 min 100% B, t = 23 min 100% B. Detection UV: 220, 254, 340 nm. Acid: Preparative acid Luna. Instrument type: Reveleris prep MPLC; column, Phenomenex Luna C18(3) (150 mm  $\times$  25 mm, 10  $\mu\text{m}$ ); flow 40 mL/min; column temp, room temperature; eluent A, 0.1% (v/v) formic acid in water; eluent B, 0.1% (v/v) formic acid in acetonitrile. Gradient: t = 0 min 5% B, t = 1 min 5% B, t = 2 min 30% B, t = 17 min 70% B, t = 18 min 100% B, t = 23 min 100% B. Detection UV: 220, 254, 340 nm, ELSD.

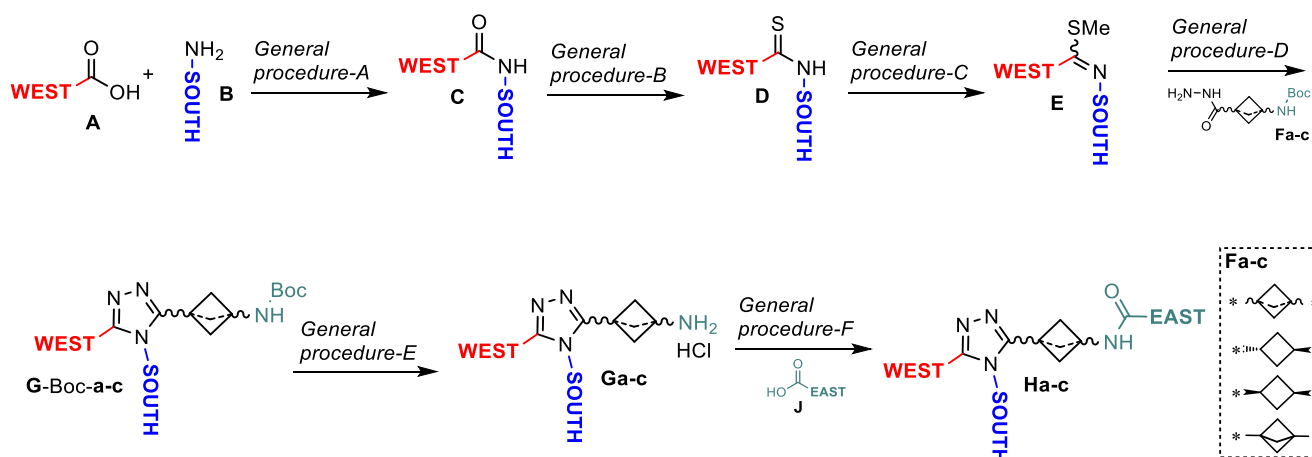

Scheme S-1. General scheme of synthesis.

## General synthetic procedures

### General Procedure A: Amide synthesis

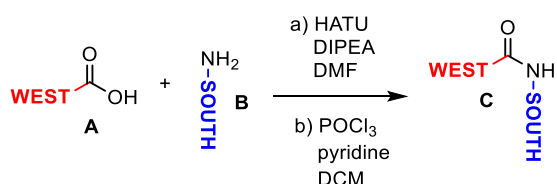

Scheme S-2. Amide synthesis.

**Method a):** To a solution of an appropriate acid **A** (1.0 equiv.) and DIPEA (1.2 equiv.) in dried DMF (0.2–0.5 M) was added HATU (1.1 equiv.) under an inert atmosphere. The reaction was stirred for 1 hour before the suitable amine **B** (1.1 equiv.) was added. The stirring was continued for 2 to 24 hours and then evaporated to dryness. The residue was either first extracted (treated with a diluted aqueous sodium bicarbonate and DCM) or directly purified by flash column chromatography on silica gel (gradient of ethyl acetate in heptane, usually 10% to 100%) to afford the target amides **C**.

**Method b):** An equimolar mixture of the starting acid and amine were dissolved in a 5:1 mixture of DCM and pyridine (reaction molarity 0.2-0.5 M), the solution was cooled in an ice-bath and treated by a dropwise addition of 1.0-1.1 equiv. of phosphorous oxychloride. The cooling bath was removed and the mixture was stirred at ambient temperature for 1 to 18 hours. After an acidic extractive work-up, drying and chromatography, the desired amides were obtained.

## General Procedure B: Thioamide synthesis

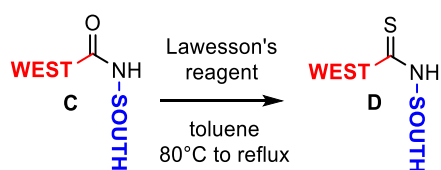

Scheme S-3. Thioamide synthesis.

The amide **C** (1.0 equiv.) was suspended under a nitrogen atmosphere in anhydrous toluene (0.10 to 0.25 M). Lawesson's reagent (1 equiv.) was added and the mixture was heated at temperature between 80 °C and reflux during 2 to 24 hours. After the reaction mixture was concentrated, the residue was extracted with DCM from aqueous phase or directly purified by flash column chromatography on silica gel (usually a gradient of ethyl acetate in heptane was used, sometimes a gradient of DCM in heptane) to afford a batch of desired thioamide **D**.

## General Procedure C: Methylation of thioamide

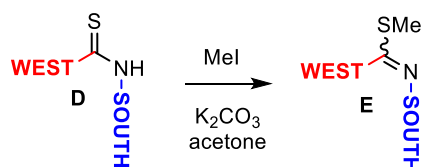

Scheme S-4. Methylation of thioamide.

To a solution of thioamide **D** (1.0 equiv.) and iodomethane (1.1-1.3 equiv.) in acetone (0.10 to 0.30 M) was added potassium carbonate (1.3–1.5 equiv.). The suspension was stirred at room temperature until the reaction completion (from 2 hours up to overnight). After solvent evaporation, the reaction mixture was either extracted from aqueous solution with DCM affording the crude product **E** (as a mixture of E/Z isomers) that could be used without any purification in the next step. For better results in the next step, the crude product **E** might be flashed over silica gel column eluted with a gradient of ethyl acetate (5% to 30%) in heptane.

## General Procedure D: Triazole cyclisation

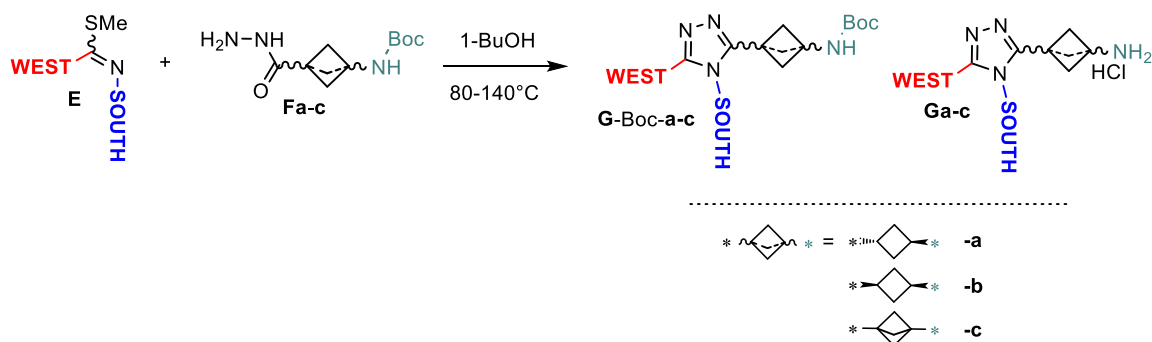

Scheme S-5. Triazole cyclisation.

A suspension of carbimidothioate **E** (1.0-1.1 equiv.) and an appropriate hydrazide **Fa-c**<sup>1</sup> (1.0-1.1 equiv.) in 1-butanol (0.10 to 0.30 M) was placed into a microwave vial and closed with a cap. The mixture was irradiated (or heated in an oil bath) at a temperature ranging from 80 to 140 °C until the completion of the reaction (typically 5 to 20 hours). After evaporating to dryness, the residue was purified by flash column chromatography on silica gel (gradient of ethyl



acetate in heptane as eluent) to afford 1,2,4-triazole derivatives Boc protected **G-Boc-a** to **G-Boc-c** or **Ga** to **Gc**, depending on the reaction temperature.

### General Procedure E: Boc removal

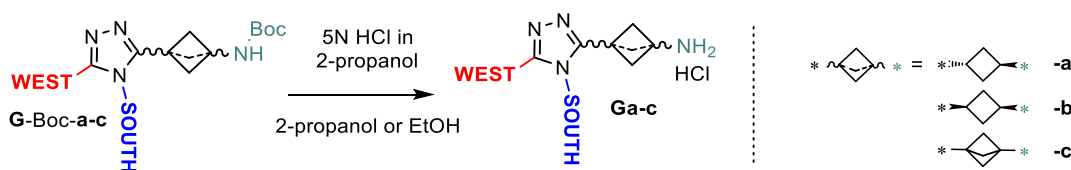

Scheme S-6. Boc removal.

To a solution or suspension of the Boc-protected 1,2,4-triazole derivate **G-Boc** (1.0 equiv.) in absolute ethanol or 2-propanol (0.05 to 0.25 M) was added hydrogen chloride as a 5 N solution in 2-propanol (10-40 equiv.). The reaction was stirred at ambient or slightly elevated (50-60 °C) temperature during 2 to 18 hours. After reaction completion (if needed, extra portions of HCl solution were added) the solvents were removed *in vacuo*, sometimes stripping the residue with acetonitrile. The crude salt **G**, or a dihydrochloride depending on the actual South and West moieties. This was used as such in the final step.

### General Procedure F: Amide coupling towards the final product

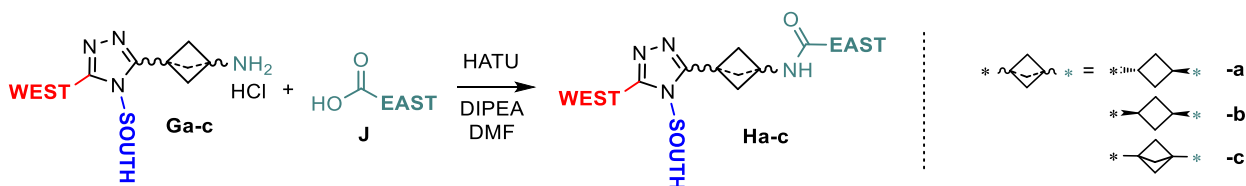

Scheme S-7. Amide coupling towards the final product.

To a suspension or solution of the appropriate acid **J** (1.1 equiv.) and HATU (1.2 equiv.) in anhydrous acetonitrile or DMF (0.02 to 0.10 M) was added DIPEA (4.0 equiv.) and the mixture was stirred from 30 to 60 minutes, preferably under an inert atmosphere before amine **G** (1.0 equiv.) was added. The coupling was complete mostly within 1-3 hours, when the mixture was concentrated to dryness. The residue was submitted to purification by preparative SFC or by flash silica gel chromatography (0% via 3-5% to 10% gradient of methanol in DCM) followed by basic mode reversed-phase column (PoraPak Rxn RP, gradient acetonitrile in 10 mM aqueous ammonium bicarbonate). Final compounds **H** were obtained mostly as a white powder after lyophilization from acetonitrile / water.

## Preparation of intermediates

Final products **1 – 6**, **15a** and **15b** and intermediate for compounds **24 – 28** have been described earlier by us.<sup>1</sup>

Preparation of *trans*-3-(5-(5-cyclopropoxy-pyridin-2-yl)-4-(2-fluorophenyl)-4H-1,2,4-triazol-3-yl)cyclobutan-1-amine dihydrochloride, intermediate for final product **7**.

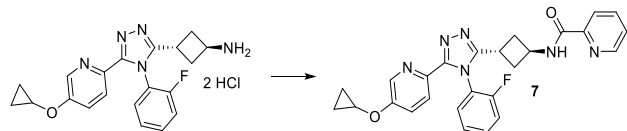

**Step-1:** In a microwave tube methyl 5-hydroxypicolinate (0.631 g, 4.0 mmol, 1.0 equiv.), potassium iodide (0.066 g, 0.400 mmol, 0.1 equiv.) and cesium carbonate (2.085 g, 6.40 mmol, 1.6 equiv.) were suspended in *N,N*-dimethylformamide (dry) (20 ml, 0.2 M). To the suspension was added bromo cyclopropane (0.481 ml, 6.00 mmol, 1.5 equiv.), the vial was capped and the reaction mixture was stirred in an oil bath at 120 °C overnight. An extra portion of bromo cyclopropane (0.481 ml, 6.00 mmol, 1.5 equiv.) was added and the reaction mixture was irradiated in a microwave oven at 200 °C for 18 hours. Reaction mixture was concentrated under reduced pressure. The residue was resuspended in aqueous sodium carbonate and extracted three times with CH<sub>2</sub>Cl<sub>2</sub>. Combined organic layers were dried over sodium sulfate, filtered and evaporated to dryness. The impure product was purified by flash column chromatography eluted with a gradient of methanol (0 to 5% then to 10%) in DCM. Desired fractions were combined and concentrated under reduced pressure to give methyl 5-cyclopropoxypicolinate as a yellow solid (50 mg, 5%). LC/MS (ESI) *m/z* for C<sub>10</sub>H<sub>11</sub>NO<sub>3</sub> 194 ([M + H]<sup>+</sup>, calculated) 194 ([M + H]<sup>+</sup>, found).

**Step-2:** 2-fluoroaniline (0.030 ml, 0.308 mmol, 1.5 equiv.) was dissolved in toluene (dry) (2.0 ml) under a nitrogen atmosphere and the solution was treated with a dropwise addition of trimethylaluminum (2 M in toluene, 0.154 ml, 0.308 mmol, 1.5 equiv.). After 15 minutes, this mixture was added to a solution of methyl 5-cyclopropoxypicolinate (0.050 g, 0.205 mmol, 1.0 equiv.) in toluene (dry) (5.0 ml) under a nitrogen atmosphere. The reaction mixture was stirred for 3 hours at 100 °C, followed by 3 days at room temperature. A new portion of the reagent was prepared from 2-fluoroaniline (9.89 μl, 0.103 mmol, 0.5 equiv.) and trimethylaluminum (2 M in toluene, 0.051 ml, 0.103 mmol, 0.5 equiv.) in toluene (dry) (1.0 ml) and after 30 minutes it was added to the main reaction mixture, which was heated again to 100 °C for 2 hours. The reaction mixture was quenched with 1N aqueous HCl. Some water was added and extracted with DCM. Combined organic layers were dried over sodium sulfate, filtered and evaporated to dryness. The impure product was purified by flash column chromatography on silica gel (gradient of ethyl acetate in heptane, 0% to 35%, then to 100%) to obtain 5-cyclopropoxy-*N*-(2-fluorophenyl)picolinamide as a colorless glass (36 mg, 64%). LC/MS (ESI) *m/z* for C<sub>15</sub>H<sub>13</sub>FN<sub>2</sub>O<sub>2</sub> 273 ([M + H]<sup>+</sup>, calculated) 273 ([M + H]<sup>+</sup>, found).

**Step-3:** 5-cyclopropoxy-*N*-(2-fluorophenyl)pyridine-2-carbothioamide was prepared according to the General Procedure **B** as a yellow crystalline solid (34.6 mg, 92%). LC/MS (ESI) *m/z* for C<sub>15</sub>H<sub>13</sub>FN<sub>2</sub>OS 289 ([M + H]<sup>+</sup>, calculated) 289 ([M + H]<sup>+</sup>, found).

**Step-4:** methyl 5-cyclopropoxy-*N*-(2-fluorophenyl)pyridine-2-carbimidothioate was prepared according to the General Procedure **C** as a pale yellow semisolid (29 mg, 80%). LC/MS (ESI) *m/z* for C<sub>16</sub>H<sub>15</sub>FN<sub>2</sub>OS 303 ([M + H]<sup>+</sup>, calculated) 303 ([M + H]<sup>+</sup>, found).

**Step-5:** *tert*-butyl (*trans*-3-(5-(5-cyclopropoxy-pyridin-2-yl)-4-(2-fluorophenyl)-4H-1,2,4-triazol-3-yl)cyclobutyl)carbamate was prepared according to the General Procedure **D** as a pale ochre semisolid (34 mg, 70%). LC/MS (ESI) *m/z* for C<sub>25</sub>H<sub>28</sub>FN<sub>5</sub>O<sub>3</sub> 466 ([M + H]<sup>+</sup>, calculated) 466 ([M + H]<sup>+</sup>, found).

**Step-6:** The title compound was prepared following to the General Procedure E and obtained as a pale yellow glass (36 mg, 100%). LC/MS (ESI) m/z for C<sub>20</sub>H<sub>20</sub>FN<sub>5</sub>O 366 ([M + H]<sup>+</sup>, calculated) 366 ([M + H]<sup>+</sup>, found).

**Preparation of *trans*-3-(4-(2-fluorophenyl)-5-(5-isopropoxyppyridin-2-yl)-4H-1,2,4-triazol-3-yl)cyclobutan-1-amine dihydrochloride, intermediate for final product 8.**

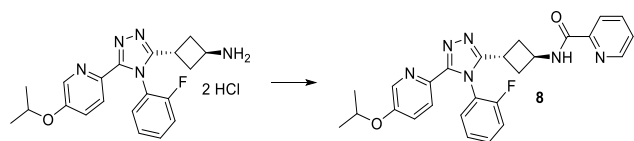

**Step-1:** In a microwave tube methyl 5-hydroxypicolinate (0.613 g, 4.0 mmol, 1.0 equiv.) and potassium carbonate (1.382 g, 10.00 mmol, 2.5 equiv.) were suspended in acetone (20 ml). The suspension was treated with 2-bromopropane (0.488 ml, 5.20 mmol, 1.3 equiv.), the vial was capped and the reaction mixture was stirred while heating in an oil bath at 80 °C for 42 hours. The mixture was then evaporated to dryness and the residue was resuspended in ethyl acetate. After trituration for 30 minutes, the suspension was filtered through celite rinsing with ethyl acetate. The filtrate was concentrated to dryness to obtain methyl 5-isopropoxypicolinate as a pale green liquid (814 mg, 100%). LC/MS (ESI) m/z for C<sub>10</sub>H<sub>13</sub>NO<sub>3</sub> 196 ([M + H]<sup>+</sup>, calculated) 196 ([M + H]<sup>+</sup>, found).

**Step-2:** 2-fluoroaniline (0.267 g, 2.400 mmol, 1.2 equiv.) was dissolved in toluene (dry) (9.6 ml) under a nitrogen atmosphere and solution was treated with dropwise addition of trimethylaluminum, (2 M in toluene, 1.200 ml, 2.400 mmol, 1.2 equiv.). After 15 minutes, methyl 5-isopropoxypicolinate (0.407 g, 2.00 mmol, 1.0 equiv.) was added and the mixture was heated to 100 °C for 2 hours. The mixture was cooled down and quenched with 6 ml of 1N aqueous HCl. Water was added and the suspension was stirred overnight at ambient temperature. A clear, two phase system was obtained. It was further diluted with DCM and water and the aqueous layer was extracted with DCM. The combined extracts were dried over sodium sulfate, filtered and evaporated to dryness to obtain *N*-(2-fluorophenyl)-5-isopropoxypicolinamide as an orange oil (564 mg, 98%). LC/MS (ESI) m/z for C<sub>15</sub>H<sub>15</sub>FN<sub>2</sub>O<sub>2</sub> 275 ([M + H]<sup>+</sup>, calculated) 275 ([M + H]<sup>+</sup>, found).

**Step-3:** *N*-(2-fluorophenyl)-5-isopropoxyppyridine-2-carbothioamide was prepared according to the General Procedure B as a yellow solid (460 mg, 80%). LC/MS (ESI) m/z for C<sub>15</sub>H<sub>15</sub>FN<sub>2</sub>OS 291 ([M + H]<sup>+</sup>, calculated) 291 ([M + H]<sup>+</sup>, found).

**Step-4:** methyl *N*-(2-fluorophenyl)-5-isopropoxyppyridine-2-carbimidothioate was prepared according to the General Procedure C as a yellow oil (461 mg, 96%). LC/MS (ESI) m/z for C<sub>16</sub>H<sub>17</sub>FN<sub>2</sub>OS 305 ([M + H]<sup>+</sup>, calculated) 305 ([M + H]<sup>+</sup>, found).

**Step-5:** *tert*-butyl (*trans*-3-(4-(2-fluorophenyl)-5-(5-isopropoxyppyridin-2-yl)-4H-1,2,4-triazol-3-yl)cyclobutyl)carbamate was prepared according to the General Procedure D as a brown semisolid (345 mg, 65%). LC/MS (ESI) m/z for C<sub>25</sub>H<sub>30</sub>FN<sub>5</sub>O<sub>3</sub> 468 ([M + H]<sup>+</sup>, calculated) 468 ([M + H]<sup>+</sup>, found).

**Step-6:** The title compound was prepared following to the General Procedure E and obtained as a brown glass (300 mg, 100%). LC/MS (ESI) m/z for C<sub>20</sub>H<sub>22</sub>FN<sub>5</sub>O 368 ([M + H]<sup>+</sup>, calculated) 368 ([M + H]<sup>+</sup>, found).

**Preparation of *trans*-3-(4-(2-fluorophenyl)-5-phenyl-4H-1,2,4-triazol-3-yl)cyclobutan-1-amine dihydrochloride, intermediate for final product 9.**

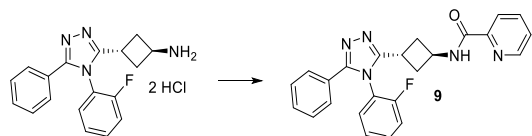

**Step-1:** 2-fluoroaniline (1.157 mL, 12.0 mmol, 1.2 equiv.) was dissolved in toluene (dry) (24 ml) under a nitrogen atmosphere, then the solution was treated with a dropwise addition of trimethylaluminum (2 M in toluene, 6.00 ml,

12.00 mmol, 1.2 equiv.). After stirring for 1 hour methyl benzoate (1.251 mL, 10.0 mmol, 1.0 equiv.) was added and the mixture was stirred for 2 hours at 90 °C and then overnight at room temperature. Then it was quenched with 1N aqueous HCl, the mixture was further diluted with DCM and water and the aqueous layer was extracted with DCM. The orange extracts were dried over sodium sulfate, filtered and evaporated thoroughly to dryness to obtain *N*-(2-fluorophenyl)benzamide as a beige solid (2.18 g, 100%). LC/MS (ESI) *m/z* for C<sub>13</sub>H<sub>10</sub>FNO 216 ([M + H]<sup>+</sup>, calculated) 216 ([M + H]<sup>+</sup>, found).

**Step-2:** *N*-(2-fluorophenyl)benzothioamide was prepared according to the General Procedure **B** as a yellow oil (2.28 g, 98%). LC/MS (ESI) *m/z* for C<sub>13</sub>H<sub>10</sub>FNS 232 ([M + H]<sup>+</sup>, calculated) 232 ([M + H]<sup>+</sup>, found).

**Step-3:** methyl *N*-(2-fluorophenyl)benzimidothioate was prepared according to the General Procedure **C** as a yellow oil (2.23 g, 92%). LC/MS (ESI) *m/z* for C<sub>14</sub>H<sub>12</sub>FNS 246 ([M + H]<sup>+</sup>, calculated) 246 ([M + H]<sup>+</sup>, found).

**Step-4:** *tert*-butyl (*trans*-3-(4-(2-fluorophenyl)-5-phenyl-4H-1,2,4-triazol-3-yl)cyclobutyl)carbamate was prepared according to the General Procedure **D** as a white foam (739 mg, 43%). LC/MS (ESI) *m/z* for C<sub>23</sub>H<sub>25</sub>FN<sub>4</sub>O<sub>2</sub> 409 ([M + H]<sup>+</sup>, calculated) 409 ([M + H]<sup>+</sup>, found).

**Step-5:** The title compound was prepared following to the General Procedure **E** and obtained as a white solid (665 mg, 100%). LC/MS (ESI) *m/z* for C<sub>18</sub>H<sub>17</sub>FN<sub>4</sub> 309([M + H]<sup>+</sup>, calculated) 309 ([M + H]<sup>+</sup>, found).

**Preparation of *trans*-3-(4-(2-fluorophenyl)-5-(pyrazin-2-yl)-4H-1,2,4-triazol-3-yl)cyclobutan-1-amine dihydrochloride, intermediate for final product 10.**

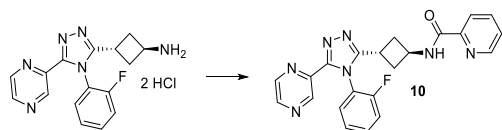

**Step-1:** *N*-(2-fluorophenyl)pyrazine-2-carboxamide was prepared following the General Procedure **A**, method a) as an off-white solid (812 mg, 88%). LC/MS (ESI) *m/z* for C<sub>11</sub>H<sub>8</sub>FN<sub>3</sub>O 218 ([M + H]<sup>+</sup>, calculated) 218 ([M + H]<sup>+</sup>, found).

**Step-2:** *N*-(2-fluorophenyl)pyrazine-2-carbothioamide was prepared according to the General Procedure **B** as a yellow solid (333 mg, 37%). LC/MS (ESI) *m/z* for C<sub>11</sub>H<sub>8</sub>FN<sub>3</sub>S 234 ([M + H]<sup>+</sup>, calculated) 234 ([M + H]<sup>+</sup>, found).

**Step-3:** methyl *N*-(2-fluorophenyl)pyrazine-2-carbimidothioate was prepared according to the General Procedure **C** as a yellow oil (333 mg, 92%). GC/MS (ESI) *m/z* for C<sub>12</sub>H<sub>10</sub>FN<sub>3</sub>S 247 ([M + H]<sup>+</sup>, calculated) 247 ([M]<sup>+</sup>, found).

**Step-4:** *tert*-butyl (*trans*-3-(4-(2-fluorophenyl)-5-(pyrazin-2-yl)-4H-1,2,4-triazol-3-yl)cyclobutyl)carbamate was prepared according to the General Procedure **D** as a brown oil (141 mg, 33%). LC/MS (ESI) *m/z* for C<sub>21</sub>H<sub>23</sub>FN<sub>6</sub>O<sub>2</sub> 411 ([M + H]<sup>+</sup>, calculated) 411 ([M + H]<sup>+</sup>, found).

**Step-5:** The title compound was prepared following to the General Procedure **E** and obtained as a purple glass (nd. mg, nd.%). LC/MS (ESI) *m/z* for C<sub>16</sub>H<sub>15</sub>FN<sub>6</sub> 311 ([M + H]<sup>+</sup>, calculated) 311 ([M + H]<sup>+</sup>, found).

**Preparation of *trans*-3-(5-(5-ethoxy-pyridin-2-yl)-4-phenyl-4H-1,2,4-triazol-3-yl)cyclobutan-1-amine trihydrochloride, intermediate for final product 11.**

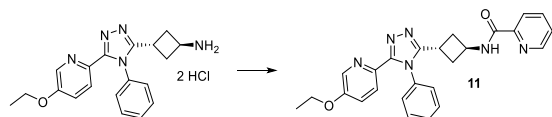

**Step-1:** 5-ethoxy-*N*-phenylpicolinamide was prepared following the General Procedure **A**, method a) as a white crystalline solid (560 mg, 77%). LC/MS (ESI) *m/z* for C<sub>14</sub>H<sub>14</sub>N<sub>2</sub>O<sub>2</sub> 243 ([M + H]<sup>+</sup>, calculated) 243 ([M + H]<sup>+</sup>, found).

**Step-2:** 5-ethoxy-*N*-phenylpyridine-2-carbothioamide was prepared according to the General Procedure **B** as a yellow solid (455 mg, 76%). LC/MS (ESI) *m/z* for C<sub>14</sub>H<sub>14</sub>N<sub>2</sub>OS 259 ([M + H]<sup>+</sup>, calculated) 259 ([M + H]<sup>+</sup>, found).

**Step-3:** methyl 5-ethoxy-*N*-phenylpyridine-2-carbimidothioate was prepared according to the General Procedure **C** as a yellow solid (449 mg, 88%). LC/MS (ESI) *m/z* for C<sub>15</sub>H<sub>16</sub>N<sub>2</sub>OS 273 ([M + H]<sup>+</sup>, calculated) 273 ([M + H]<sup>+</sup>, found).

**Step-4:** *tert*-butyl (*trans*-3-(5-(5-ethoxypyridin-2-yl)-4-phenyl-4H-1,2,4-triazol-3-yl)cyclobutyl)carbamate was prepared according to the General Procedure **D** as a yellow foam (595 mg, 76%). LC/MS (ESI) *m/z* for C<sub>24</sub>H<sub>29</sub>N<sub>5</sub>O<sub>3</sub> 436 ([M + H]<sup>+</sup>, calculated) 436 ([M + H]<sup>+</sup>, found).

**Step-5:** The compound was prepared following to the General Procedure **E** and obtained as a white solid (462 mg, 92%). LC/MS (ESI) *m/z* for C<sub>19</sub>H<sub>21</sub>N<sub>5</sub>O 336 ([M + H]<sup>+</sup>, calculated) 336 ([M + H]<sup>+</sup>, found).

#### Preparation of *trans*-3-(4-(3-chlorophenyl)-5-(5-ethoxypyridin-2-yl)-4H-1,2,4-triazol-3-yl)cyclobutan-1-amine dihydrochloride, intermediate for final product **12**.

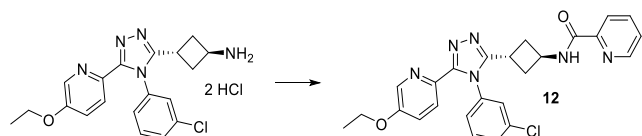

**Step-1:** *N*-(3-chlorophenyl)-5-ethoxypicolinamide was prepared following the General Procedure **A**, method a) as a white crystalline solid (106 mg, 82%). LC/MS (ESI) *m/z* for C<sub>14</sub>H<sub>13</sub>ClN<sub>2</sub>O<sub>2</sub> 277/279 ([M + H]<sup>+</sup>, calculated) 277/279 ([M + H]<sup>+</sup>, found).

**Step-2:** *N*-(3-chlorophenyl)-5-ethoxypyridine-2-carbothioamide was prepared according to the General Procedure **B** as a yellow solid (95 mg, 85%). LC/MS (ESI) *m/z* for C<sub>14</sub>H<sub>13</sub>ClN<sub>2</sub>OS 293/295 ([M + H]<sup>+</sup>, calculated) 293/295 ([M + H]<sup>+</sup>, found).

**Step-3:** methyl *N*-(3-chlorophenyl)-5-ethoxypyridine-2-carbimidothioate was prepared according to the General Procedure **C** as a yellow solid (92 mg, 93%). LC/MS (ESI) *m/z* for C<sub>15</sub>H<sub>15</sub>ClN<sub>2</sub>OS 307/309 ([M + H]<sup>+</sup>, calculated) 307/309 ([M + H]<sup>+</sup>, found).

**Step-4:** *tert*-butyl (*trans*-3-(4-(3-chlorophenyl)-5-(5-ethoxypyridin-2-yl)-4H-1,2,4-triazol-3-yl)cyclobutyl)carbamate was prepared according to the General Procedure **D** as a white foam (130 mg, 90%). LC/MS (ESI) *m/z* for C<sub>24</sub>H<sub>28</sub>ClN<sub>5</sub>O<sub>3</sub> 470/472 ([M + H]<sup>+</sup>, calculated) 470/472 ([M + H]<sup>+</sup>, found).

**Step-5:** The title compound was prepared following to the General Procedure **E** and obtained as a white solid (131 mg, 100%). LC/MS (ESI) *m/z* for C<sub>19</sub>H<sub>20</sub>ClN<sub>5</sub>O 370/372 ([M + H]<sup>+</sup>, calculated) 370/372 ([M + H]<sup>+</sup>, found).

#### Preparation of *trans*-3-(5-(5-ethoxypyridin-2-yl)-4-(5-methylthiophen-2-yl)-4H-1,2,4-triazol-3-yl)cyclobutan-1-amine trihydrochloride, intermediate for final products **13**, **22a**, **22b** and **23**.

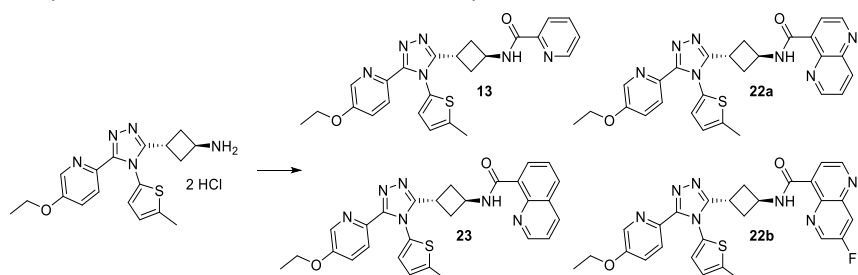

**Step-1:** 5-ethoxy-*N*-(5-methylthiophen-2-yl)picolinamide was prepared following the General Procedure **A**, method b) as a beige solid (273 mg, 77%). LC/MS (ESI) *m/z* for C<sub>13</sub>H<sub>14</sub>N<sub>2</sub>O<sub>2</sub>S 263 ([M + H]<sup>+</sup>, calculated) 263 ([M + H]<sup>+</sup>, found).

**Step-2:** 5-ethoxy-*N*-(5-methylthiophen-2-yl)pyridine-2-carbothioamide was prepared according to the General Procedure **B** as a yellow solid (176 mg, 57%). LC/MS (ESI) *m/z* for C<sub>13</sub>H<sub>14</sub>N<sub>2</sub>OS<sub>2</sub> 279 ([M + H]<sup>+</sup>, calculated) 279 ([M + H]<sup>+</sup>, found).

**Step-3:** methyl 5-ethoxy-*N*-(5-methylthiophen-2-yl)pyridine-2-carbimidothioate was prepared according to the General Procedure **C** as a yellow oil (191 mg, 99%). LC/MS (ESI) *m/z* for C<sub>14</sub>H<sub>16</sub>N<sub>2</sub>OS<sub>2</sub> 293 ([M + H]<sup>+</sup>, calculated) 293 ([M + H]<sup>+</sup>, found).

**Step-4:** *tert*-butyl (*trans*-3-(5-(5-ethoxypyridin-2-yl)-4-(5-methylthiophen-2-yl)-4H-1,2,4-triazol-3-yl)cyclobutyl)carbamate was prepared according to the General Procedure **D** as a brown oil (188 mg, 52%). LC/MS (ESI) *m/z* for C<sub>23</sub>H<sub>29</sub>N<sub>5</sub>O<sub>3</sub>S 456 ([M + H]<sup>+</sup>, calculated) 456 ([M + H]<sup>+</sup>, found).

**Step-5:** The title compound was prepared following to the General Procedure **E** and obtained as a brown solid (153 mg, 72%). LC/MS (ESI) *m/z* for C<sub>18</sub>H<sub>21</sub>N<sub>5</sub>OS 356 ([M + H]<sup>+</sup>, calculated) 356 ([M + H]<sup>+</sup>, found).

**Preparation of *trans*-3-(4-(5-chlorothiophen-2-yl)-5-(5-ethoxypyridin-2-yl)-4H-1,2,4-triazol-3-yl)cyclobutan-1-amine dihydrochloride, intermediate for final product 14.**

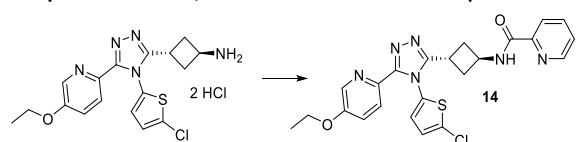

**Step-1:** 5-chlorothiophene-2-carboxylic acid (8.13 g, 50 mmol, 1.00 equiv.) was placed under a nitrogen atmosphere. About 10 equivalents of *t*-Butanol (47.5 ml) was added as solvent followed by triethylamine (7.32 ml, 52.5 mmol, 1.05 equiv.) and DPPA diphenylphosphoryl azide (11.38 ml, 52.5 mmol, 1.05 equiv.). The reaction mixture was stirred at 90 °C for 16 hours. The reaction mixture was concentrated under reduced pressure, and the residue was partitioned between water and MTBE. After phase separation, the organic layer was rinsed once with water and then with brine. The aqueous phases were extracted twice more with MTBE and the combined organic layer were dried over sodium sulfate, filtered and concentrated under reduced pressure to obtain *tert*-butyl (5-chlorothiophen-2-yl)carbamate as a grey solid (11.75 g, 98%). LC/MS (ESI) *m/z* for C<sub>9</sub>H<sub>12</sub>ClNO<sub>2</sub>S 232/234 ([M + H]<sup>+</sup>, calculated) 232/234 ([M - H]<sup>+</sup>, found).

**Step-2:** *tert*-butyl (5-chlorothiophen-2-yl)carbamate (4.82 g, 20.0 mmol, 1.0 equiv.) was dissolved in 1,4-dioxane (25 ml) followed by the addition of 4 M hydrochloric acid in 1,4-dioxane (25.00 ml, 100 mmol, 5.0 equiv.). The reaction mixture was stirred for 22 hours at room temperature. Followed by 4 hours at 60 °C. The suspension was cooled in an ice-bath and filtered through a P3 glass filter under a nitrogen flow, rinsing with MTBE and drying in a nitrogen flow to obtain 5-chlorothiophen-2-amine hydrochloride as brown solid (3.26 g, 89%). LC/MS (ESI) *m/z* for C<sub>4</sub>H<sub>4</sub>ClNS 132/134 ([M + H]<sup>+</sup>, calculated) no mass found.

**Step-3:** *N*-(5-chlorothiophen-2-yl)-5-ethoxypicolinamide was prepared following the General Procedure **A**, method b) using 5-ethoxypicolinate as described in Step-1 in the synthesis for final products **16a** and **16b** as a brown solid (516 mg, 79%). LC/MS (ESI) *m/z* for C<sub>12</sub>H<sub>11</sub>ClN<sub>2</sub>O<sub>2</sub>S 283/285 ([M + H]<sup>+</sup>, calculated) 283/285 ([M + H]<sup>+</sup>, found).

**Step-4:** *N*-(5-chlorothiophen-2-yl)-5-ethoxypyridine-2-carbothioamide was prepared according to the General Procedure **B** as a yellow solid (135 mg, 24%). LC/MS (ESI) *m/z* for C<sub>12</sub>H<sub>11</sub>ClN<sub>2</sub>OS<sub>2</sub> 299/301 ([M + H]<sup>+</sup>, calculated) 299/301 ([M + H]<sup>+</sup>, found).

**Step-5:** methyl *N*-(5-chlorothiophen-2-yl)-5-ethoxypyridine-2-carbimidothioate was prepared according to the General Procedure **C** as a yellow oil (98 mg, 90%). LC/MS (ESI) *m/z* for C<sub>13</sub>H<sub>13</sub>ClN<sub>2</sub>OS<sub>2</sub> 313/315 ([M + H]<sup>+</sup>, calculated) 313/315 ([M + H]<sup>+</sup>, found).

**Step-6:** *tert*-butyl (*trans*-3-(4-(5-chlorothiophen-2-yl)-5-(5-ethoxypyridin-2-yl)-4H-1,2,4-triazol-3-yl)cyclobutyl)carbamate was prepared according to the General Procedure **D** as a brown oil (97 mg, 48%). LC/MS (ESI) *m/z* for C<sub>22</sub>H<sub>26</sub>ClN<sub>5</sub>O<sub>3</sub>S 476/478 ([M + H]<sup>+</sup>, calculated) 476/478 ([M + H]<sup>+</sup>, found).

**Step-7:** The title compound was prepared following to the General Procedure **E** and obtained as a brown glass (67 mg, 39%). LC/MS (ESI) *m/z* for C<sub>17</sub>H<sub>18</sub>ClN<sub>5</sub>OS 376/378 ([M + H]<sup>+</sup>, calculated) 376/378 ([M + H]<sup>+</sup>, found).

**Preparation of *trans*-3-(5-(5-ethoxypyridin-2-yl)-4-(pyridin-2-yl)-4H-1,2,4-triazol-3-yl)cyclobutan-1-amine trihydrochloride, intermediate for final products 16a and 16b.**

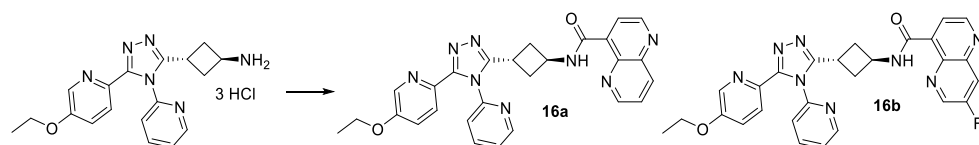

**Step-1:** methyl 5-hydroxypicolinate (6.13 g, 40.00 mmol, 1.0 equiv.) and potassium carbonate (13.82 g, 100 mmol, 2.5 equiv.) were suspended in acetone (160 ml). The suspension was treated with iodoethane (4.00 ml, 50.0 mmol, 1.25 equiv.). The reaction mixture was stirred for 17 hours at room temperature, followed by 24 hours at 50 °C. The reaction mixture was evaporated to dryness and the residue was triturated with DCM. The residue was filtered off on a celite pad rinsing with DCM and the yellow filtrate was concentrated to obtain methyl 5-ethoxypicolinate as a yellow solid (7.24 g, 99%). LC/MS (ESI) *m/z* for C<sub>9</sub>H<sub>11</sub>NO<sub>3</sub> 182 ([M + H]<sup>+</sup>, calculated) 182 ([M + H]<sup>+</sup>, found).

**Step-2:** pyridin-2-amine (0.339 g, 3.60 mmol, 1.2 equiv.) was dissolved in toluene (dry) (15 ml) under a nitrogen atmosphere, then the solution was treated with a dropwise addition of trimethylaluminum (2 M in toluene, 1.800 ml, 3.60 mmol, 1.2 equiv.). After stirring for 1 hour methyl 5-ethoxypicolinate (0.549 g, 3.0 mmol, 1.0 equiv.) was added and the mixture was stirred for 2 hours at 90 °C and then overnight at room temperature. Then it was quenched with 1N aqueous HCl, the mixture was further diluted with DCM and water and the aqueous layer was extracted with DCM. The orange extracts were dried over sodium sulfate, filtered and evaporated thoroughly to dryness to obtain 5-ethoxy-*N*-(pyridin-2-yl)picolinamide as an off-white solid (737 mg, 99%). LC/MS (ESI) *m/z* for C<sub>13</sub>H<sub>13</sub>N<sub>3</sub>O<sub>2</sub> 244 ([M + H]<sup>+</sup>, calculated) 244 ([M + H]<sup>+</sup>, found).

**Step-3:** 5-ethoxy-*N*-(pyridin-2-yl)pyridine-2-carbthioamide was prepared according to the General Procedure **B** as a yellow solid (449 mg, 58%). LC/MS (ESI) *m/z* for C<sub>13</sub>H<sub>13</sub>N<sub>3</sub>OS 260 ([M + H]<sup>+</sup>, calculated) 260 ([M + H]<sup>+</sup>, found).

**Step-4:** methyl 5-ethoxy-*N*-(pyridin-2-yl)pyridine-2-carbimidothioate was prepared according to the General Procedure **C** as a yellow crystalline solid (175 mg, 31%). LC/MS (ESI) *m/z* for C<sub>14</sub>H<sub>15</sub>N<sub>3</sub>OS 274 ([M + H]<sup>+</sup>, calculated) 274 ([M + H]<sup>+</sup>, found).

**Step-5:** *tert*-butyl (*trans*-3-(5-(5-ethoxypyridin-2-yl)-4-(pyridin-2-yl)-4H-1,2,4-triazol-3-yl)cyclobutyl)carbamate was prepared according to the General Procedure **D** as a colorless glass (134 mg, 97%). LC/MS (ESI) *m/z* for C<sub>23</sub>H<sub>28</sub>N<sub>6</sub>O<sub>3</sub> 437 ([M + H]<sup>+</sup>, calculated) 437 ([M + H]<sup>+</sup>, found).

**Step-6:** The title compound was prepared following to the General Procedure **E** and obtained as a white solid (125 mg, 95%). LC/MS (ESI) *m/z* for C<sub>18</sub>H<sub>20</sub>N<sub>6</sub>O 337 ([M + H]<sup>+</sup>, calculated) 337 ([M + H]<sup>+</sup>, found).

Preparation of *trans*-3-(5-(5-ethoxypyridin-2-yl)-4-(pyridin-3-yl)-4H-1,2,4-triazol-3-yl)cyclobutan-1-amine trihydrochloride, intermediate for final products 17a and 17b.

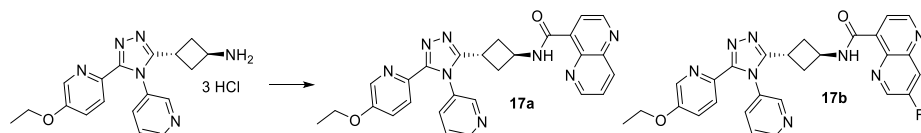

**Step-1:** See Step-1 in the synthesis for final products **16a** and **16b**

**Step-2:** pyridin-3-amine (0.339 g, 3.60 mmol, 1.2 equiv.) was dissolved in toluene (dry) (15 ml) under a nitrogen atmosphere, then the solution was treated with a dropwise addition of trimethylaluminum (2 M in toluene, 1.800 ml, 3.60 mmol, 1.2 equiv.). After stirring for 1 hour methyl 5-ethoxypicolinate (0.549 g, 3.0 mmol, 1.0 equiv.) was added and the mixture was stirred for 2 hours at 90 °C and then overnight at room temperature. Then the reaction mixture was quenched with 1N aqueous HCl, the mixture and further diluted with DCM and water and the aqueous layer was extracted with DCM once more. The orange extracts were dried over sodium sulfate, filtered and evaporated thoroughly to dryness to obtain 5-ethoxy-*N*-(pyridin-3-yl)picolinamide as an off-white solid (716 mg, 96%). LC/MS (ESI) *m/z* for C<sub>13</sub>H<sub>13</sub>N<sub>3</sub>O<sub>2</sub> 244 ([M + H]<sup>+</sup>, calculated) 244 ([M + H]<sup>+</sup>, found).

**Step-3:** 5-ethoxy-*N*-(pyridin-3-yl)pyridine-2-carbothioamide was prepared according to the General Procedure **B** as a yellow solid (641 mg, 86%). LC/MS (ESI) *m/z* for C<sub>13</sub>H<sub>13</sub>N<sub>3</sub>OS 260 ([M + H]<sup>+</sup>, calculated) 260 ([M + H]<sup>+</sup>, found).

**Step-4:** methyl 5-ethoxy-*N*-(pyridin-3-yl)pyridine-2-carbimidothioate was prepared according to the General Procedure **C** as a yellow crystalline solid (377 mg, 50%). LC/MS (ESI) *m/z* for C<sub>14</sub>H<sub>15</sub>N<sub>3</sub>OS 274 ([M + H]<sup>+</sup>, calculated) 274 ([M + H]<sup>+</sup>, found).

**Step-5:** *tert*-butyl ((1*r*,3*r*)-3-(5-(5-ethoxypyridin-2-yl)-4-(pyridin-3-yl)-4H-1,2,4-triazol-3-yl)cyclobutyl)carbamate was prepared according to the General Procedure **D** as a whitish glass (277 mg, 92%). LC/MS (ESI) *m/z* for C<sub>23</sub>H<sub>28</sub>N<sub>6</sub>O<sub>3</sub> 437 ([M + H]<sup>+</sup>, calculated) 437 ([M + H]<sup>+</sup>, found).

**Step-6:** The title compound was prepared following to the General Procedure **E** and obtained as a white solid (264 mg, 99%). LC/MS (ESI) *m/z* for C<sub>18</sub>H<sub>20</sub>N<sub>6</sub>O 337 ([M + H]<sup>+</sup>, calculated) 337 ([M + H]<sup>+</sup>, found).

Preparation of *trans*-3-(5-(5-ethoxypyridin-2-yl)-4-(pyridin-4-yl)-4H-1,2,4-triazol-3-yl)cyclobutan-1-amine trihydrochloride, intermediate for final products 18a and 18b.

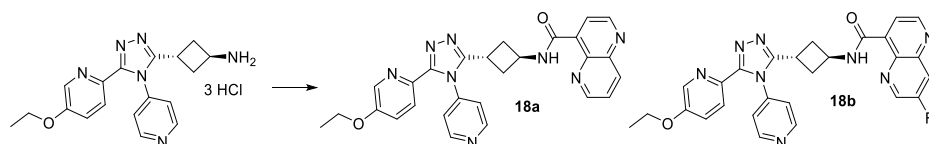

**Step-1:** See Step-1 in the synthesis for final products **16a** and **16b**

**Step-2:** pyridin-4-amine (0.339 g, 3.60 mmol, 1.2 equiv.) was dissolved in toluene (dry) (15 ml) under a nitrogen atmosphere, then the solution was treated with a dropwise addition of trimethylaluminum (2 M in toluene, 1.800 ml, 3.60 mmol, 1.2 equiv.). After stirring for 1 hour methyl 5-ethoxypicolinate (0.549 g, 3.0 mmol, 1.0 equiv.) was added and the mixture was stirred for 2 hours at 90 °C and then overnight at room temperature. Then the reaction mixture was quenched with 1N aqueous HCl and further diluted with DCM and water and the aqueous layer was extracted with DCM once more. The orange extracts were dried over sodium sulfate, filtered and evaporated thoroughly to dryness to obtain 5-ethoxy-*N*-(pyridin-4-yl)picolinamide as an orange solid (649 mg, 84%). LC/MS (ESI) *m/z* for C<sub>13</sub>H<sub>13</sub>N<sub>3</sub>O<sub>2</sub> 244 ([M + H]<sup>+</sup>, calculated) 244 ([M + H]<sup>+</sup>, found).



**Step-3:** 5-ethoxy-*N*-(pyridin-4-yl)pyridine-2-carbothioamide was prepared according to the General Procedure **B** as a yellow solid (381 mg, 55%). LC/MS (ESI) *m/z* for C<sub>13</sub>H<sub>13</sub>N<sub>3</sub>OS 260 ([M + H]<sup>+</sup>, calculated) 260 ([M + H]<sup>+</sup>, found).

**Step-4:** ethyl 5-ethoxy-*N*-(pyridin-4-yl)pyridine-2-carbimidothioate was prepared according to the General Procedure **C** where iodoethane was used instead of iodomethane as a yellow oil (222 mg, 52%). LC/MS (ESI) *m/z* for C<sub>15</sub>H<sub>17</sub>N<sub>3</sub>OS 288 ([M + H]<sup>+</sup>, calculated) 288 ([M + H]<sup>+</sup>, found).

**Step-5:** *tert*-butyl (*trans*-3-(5-(5-ethoxypyridin-2-yl)-4-(pyridin-4-yl)-4H-1,2,4-triazol-3-yl)cyclobutyl)carbamate was prepared according to the General Procedure **D** as a colorless oil (269 mg, 83%). LC/MS (ESI) *m/z* for C<sub>23</sub>H<sub>28</sub>N<sub>6</sub>O<sub>3</sub> 437 ([M + H]<sup>+</sup>, calculated) 437 ([M + H]<sup>+</sup>, found).

**Step-6:** The title compound was prepared following to the General Procedure **E** and obtained as a white solid (262 mg, 100%). LC/MS (ESI) *m/z* for C<sub>18</sub>H<sub>20</sub>N<sub>6</sub>O 337 ([M + H]<sup>+</sup>, calculated) 337 ([M + H]<sup>+</sup>, found).

**Preparation of 3-(5-(5-ethoxypyridin-2-yl)-4-(pyridin-2-yl)-4H-1,2,4-triazol-3-yl)bicyclo[1.1.1]pentan-1-amine trihydrochloride, intermediate for final product 19.**

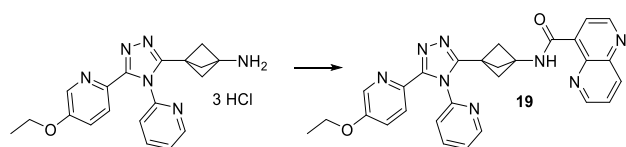

**Step-1:** See Step-1 in the synthesis for final products **16a** and **16b**

**Step-2:** pyridin-2-amine (0.339 g, 3.60 mmol, 1.2 equiv.) was dissolved in toluene (dry) (15 ml) under a nitrogen atmosphere, then the solution was treated with a dropwise addition of trimethylaluminum (2 M in toluene, 1.800 ml, 3.60 mmol, 1.2 equiv.). After stirring for 1 hour methyl 5-ethoxypicolinate (0.549 g, 3.0 mmol, 1.0 equiv.) was added and the mixture was stirred for 2 hours at 90 °C and then overnight at room temperature. Then the reaction mixture was quenched with 1N aqueous HCl and further diluted with DCM and water and the aqueous layer was extracted with DCM once more. The orange extracts were dried over sodium sulfate, filtered and evaporated thoroughly to dryness to obtain 5-ethoxy-*N*-(pyridin-2-yl)picolinamide as an off-white solid (737 mg, 99%). LC/MS (ESI) *m/z* for C<sub>13</sub>H<sub>13</sub>N<sub>3</sub>O<sub>2</sub> 244 ([M + H]<sup>+</sup>, calculated) 244 ([M + H]<sup>+</sup>, found).

**Step-3:** 5-ethoxy-*N*-(pyridin-2-yl)pyridine-2-carbothioamide was prepared according to the General Procedure **B** as a yellow solid (449 mg, 58%). LC/MS (ESI) *m/z* for C<sub>13</sub>H<sub>13</sub>N<sub>3</sub>OS 260 ([M + H]<sup>+</sup>, calculated) 260 ([M + H]<sup>+</sup>, found).

**Step-4:** methyl 5-ethoxy-*N*-(pyridin-2-yl)pyridine-2-carbimidothioate was prepared according to the General Procedure **C** as a yellow crystalline solid (175 mg, 31%). LC/MS (ESI) *m/z* for C<sub>14</sub>H<sub>15</sub>N<sub>3</sub>OS 274 ([M + H]<sup>+</sup>, calculated) 274 ([M + H]<sup>+</sup>, found).

**Step-5:** *tert*-butyl (3-(5-(5-ethoxypyridin-2-yl)-4-(pyridin-2-yl)-4H-1,2,4-triazol-3-yl)bicyclo[1.1.1]pentan-1-yl)carbamate was prepared according to the General Procedure **D** as a colorless glass (116 mg, 83%). LC/MS (ESI) *m/z* for C<sub>24</sub>H<sub>28</sub>N<sub>6</sub>O<sub>3</sub> 449 ([M + H]<sup>+</sup>, calculated) 449 ([M + H]<sup>+</sup>, found).

**Step-6:** The title compound was prepared following to the General Procedure **E** and obtained as a white solid (108 mg, 97%). LC/MS (ESI) *m/z* for C<sub>19</sub>H<sub>20</sub>N<sub>6</sub>O 349 ([M + H]<sup>+</sup>, calculated) 349 ([M + H]<sup>+</sup>, found).

**Preparation of 3-(5-(5-ethoxypyridin-2-yl)-4-(pyridin-3-yl)-4H-1,2,4-triazol-3-yl)bicyclo[1.1.1]pentan-1-amine trihydrochloride, intermediate for final product 20.**

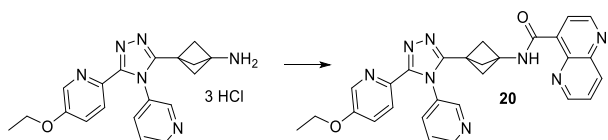

**Step-1:** See Step-1 in the synthesis for final products **16a** and **16b**

**Step-2:** pyridin-3-amine (0.339 g, 3.60 mmol, 1.2 equiv.) was dissolved in toluene (dry) (15 ml) under a nitrogen atmosphere, then the solution was treated with a dropwise addition of trimethylaluminum (2 M in toluene, 1.800 ml, 3.60 mmol, 1.2 equiv.). After stirring for 1 hour methyl 5-ethoxypicolinate (0.549 g, 3.0 mmol, 1.0 equiv.) was added and the mixture was stirred for 2 hours at 90 °C and then overnight at room temperature. Then the reaction mixture was quenched with 1N aqueous HCl and further diluted with DCM and water, the aqueous layer was extracted with DCM once more. The orange extracts were dried over sodium sulfate, filtered and evaporated thoroughly to dryness to obtain 5-ethoxy-*N*-(pyridin-3-yl)picolinamide as an off-white solid (716 mg, 96%). LC/MS (ESI) *m/z* for C<sub>13</sub>H<sub>13</sub>N<sub>3</sub>O<sub>2</sub> 244 ([M + H]<sup>+</sup>, calculated) 244 ([M + H]<sup>+</sup>, found).

**Step-3:** 5-ethoxy-*N*-(pyridin-3-yl)pyridine-2-carbothioamide was prepared according to the General Procedure **B** as a yellow solid (641 mg, 86%). LC/MS (ESI) *m/z* for C<sub>13</sub>H<sub>13</sub>N<sub>3</sub>OS 260 ([M + H]<sup>+</sup>, calculated) 260 ([M + H]<sup>+</sup>, found).

**Step-4:** methyl 5-ethoxy-*N*-(pyridin-3-yl)pyridine-2-carbimidothioate was prepared according to the General Procedure **C** as a yellow crystalline solid (377 mg, 50%). LC/MS (ESI) *m/z* for C<sub>14</sub>H<sub>15</sub>N<sub>3</sub>OS 274 ([M + H]<sup>+</sup>, calculated) 274 ([M + H]<sup>+</sup>, found).

**Step-5:** *tert*-butyl (3-(5-(5-ethoxypyridin-3-yl)-4-(pyridin-2-yl)-4H-1,2,4-triazol-3-yl)bicyclo[1.1.1]pentan-1-yl)carbamate was prepared according to the General Procedure **D** as a yellow semisolid (263 mg, 77%). LC/MS (ESI) *m/z* for C<sub>24</sub>H<sub>28</sub>N<sub>6</sub>O<sub>3</sub> 449 ([M + H]<sup>+</sup>, calculated) 449 ([M + H]<sup>+</sup>, found).

**Step-6:** The title compound was prepared following to the General Procedure **E** and obtained as a white solid (233 mg, 100%). LC/MS (ESI) *m/z* for C<sub>19</sub>H<sub>20</sub>N<sub>6</sub>O 349 ([M + H]<sup>+</sup>, calculated) 349 ([M + H]<sup>+</sup>, found).

**Preparation of 3-(5-(5-ethoxypyridin-2-yl)-4-(pyridin-4-yl)-4H-1,2,4-triazol-3-yl)bicyclo[1.1.1]pentan-1-amine trihydrochloride, intermediate for final product 21.**

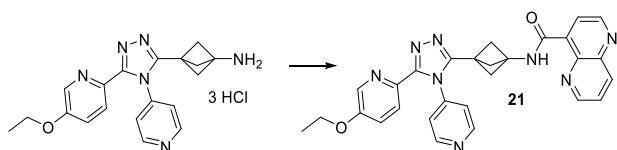

**Step-1:** See Step-1 in the synthesis for final products **16a** and **16b**.

**Step-2:** pyridin-4-amine (0.339 g, 3.60 mmol, 1.2 equiv.) was dissolved in toluene (dry) (15 ml) under a nitrogen atmosphere, then the solution was treated with a dropwise addition of trimethylaluminum (2 M in toluene, 1.800 ml, 3.60 mmol, 1.2 equiv.). After stirring for 1 hour methyl 5-ethoxypicolinate (0.549 g, 3.0 mmol, 1.0 equiv.) was added and the mixture was stirred for 2 hours at 90 °C and then overnight at room temperature. Then the reaction mixture was quenched with 1N aqueous HCl and further diluted with DCM and water, the aqueous layer was extracted with DCM once more. The orange extracts were dried over sodium sulfate, filtered and evaporated thoroughly to dryness to obtain 5-ethoxy-*N*-(pyridin-4-yl)picolinamide as an orange solid (649 mg, 84%). LC/MS (ESI) *m/z* for C<sub>13</sub>H<sub>13</sub>N<sub>3</sub>O<sub>2</sub> 244 ([M + H]<sup>+</sup>, calculated) 244 ([M + H]<sup>+</sup>, found).

**Step-3:** 5-ethoxy-*N*-(pyridin-4-yl)pyridine-2-carbothioamide was prepared according to the General Procedure **B** as a yellow solid (381 mg, 55%). LC/MS (ESI) *m/z* for C<sub>13</sub>H<sub>13</sub>N<sub>3</sub>OS 260 ([M + H]<sup>+</sup>, calculated) 260 ([M + H]<sup>+</sup>, found).

**Step-4:** ethyl 5-ethoxy-*N*-(pyridin-4-yl)pyridine-2-carbimidothioate was prepared according to the General Procedure C were iodoethane was used instead of iodomethane as a yellow oil (222 mg, 52%). LC/MS (ESI) *m/z* for C<sub>15</sub>H<sub>17</sub>N<sub>3</sub>OS 288 ([M + H]<sup>+</sup>, calculated) 288 ([M + H]<sup>+</sup>, found).

**Step-5:** *tert*-butyl (3-(5-(5-ethoxypyridin-4-yl)-4-(pyridin-2-yl)-4H-1,2,4-triazol-3-yl)bicyclo[1.1.1]pentan-1-yl)carbamate was prepared according to the General Procedure D as an off-white solid (17 mg, 98%). LC/MS (ESI) *m/z* for C<sub>24</sub>H<sub>28</sub>N<sub>6</sub>O<sub>3</sub> 449 ([M + H]<sup>+</sup>, calculated) 449 ([M + H]<sup>+</sup>, found).

**Step-6:** The title compound was prepared following to the General Procedure E and obtained as a white solid (17 mg, 99%). LC/MS (ESI) *m/z* for C<sub>19</sub>H<sub>20</sub>N<sub>6</sub>O 349 ([M + H]<sup>+</sup>, calculated) 349 ([M + H]<sup>+</sup>, found).

**Preparation of *trans*-3-(5-(5-(difluoromethoxy)pyridin-2-yl)-4-(2-fluorophenyl)-4H-1,2,4-triazol-3-yl)cyclobutan-1-amine dihydrochloride, intermediate for final products 29a and 29b.**

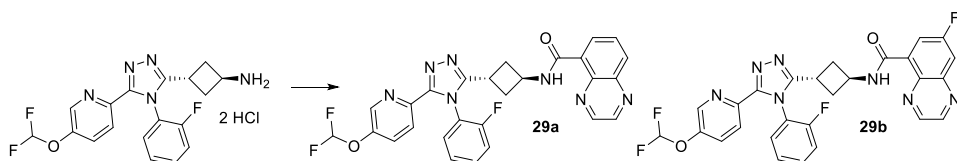

**Step-1:** potassium carbonate (0.829 g, 6.00 mmol, 1.5 equiv.) was suspended in *N,N*-dimethylformamide (4.0 ml) and then heated up to 100 °C. To the hot suspension a solution of methyl 5-hydroxypicolinate (0.631 g, 4.0 mmol, 1.0 equiv.) and sodium 2-chloro-2,2-difluoroacetate (1.220 g, 8.00 mmol, 2.0 equiv.) in *N,N*-dimethylformamide (8.0 ml) was added dropwise over a period of 20 minutes. After the addition the reaction mixture was allowed to cool to room temperature. Water was added and the product was extracted DCM, the organic extracts were rinsed once with water, dried over sodium sulfate, filtered and evaporated to dryness at not too high vacuum. The crude was flashed on a 24 gram silica gel cartridge eluted with a gradient of ethyl acetate (10% via 50% to 100%) in heptane to obtain methyl 5-(difluoromethoxy)picolinate as a colorless oil (676 mg, 83%). LC/MS (ESI) *m/z* for C<sub>8</sub>H<sub>7</sub>F<sub>2</sub>NO<sub>3</sub> 204 ([M + H]<sup>+</sup>, calculated) 204 ([M + H]<sup>+</sup>, found).

**Step-2:** 2-fluoroaniline (0.267 g, 2.400 mmol, 1.2 equiv.) was dissolved in toluene (dry) (10 ml) under a nitrogen atmosphere and solution was treated with dropwise addition of trimethylaluminum, (2 M in toluene, 1.200 ml, 2.400 mmol, 1.2 equiv.). After 15 minutes, methyl 5-(difluoromethoxy)picolinate (0.406 g, 2.00 mmol, 1.0 equiv.) was added and the mixture was heated to 100 °C for 1 hour. The mixture was cooled down and quenched with 1N aqueous HCl. Water was added aqueous layer was extracted with DCM. The combined extracts were dried over sodium sulfate, filtered and evaporated to dryness to obtain a solid. This was stripped with acetonitrile to obtain 5-(difluoromethoxy)-*N*-(2-fluorophenyl)picolinamide as a beige solid (563 mg, 99%). LC/MS (ESI) *m/z* for C<sub>13</sub>H<sub>9</sub>F<sub>3</sub>N<sub>2</sub>O<sub>2</sub> 283 ([M + H]<sup>+</sup>, calculated) 283 ([M + H]<sup>+</sup>, found).

**Step-3:** 5-(difluoromethoxy)-*N*-(2-fluorophenyl)pyridine-2-carbothioamide was prepared according to the General Procedure B as a yellow solid (551 mg, 93%). LC/MS (ESI) *m/z* for C<sub>13</sub>H<sub>9</sub>F<sub>3</sub>N<sub>2</sub>OS 299 ([M + H]<sup>+</sup>, calculated) 299 ([M + H]<sup>+</sup>, found).

**Step-4:** methyl 5-(difluoromethoxy)-*N*-(2-fluorophenyl)pyridine-2-carbimidothioate was prepared according to the General Procedure C as a yellow oil (569 mg, 100%). LC/MS (ESI) *m/z* for C<sub>14</sub>H<sub>11</sub>F<sub>3</sub>N<sub>2</sub>OS 313 ([M + H]<sup>+</sup>, calculated) 313 ([M + H]<sup>+</sup>, found).

**Step-5:** *tert*-butyl (*trans*-3-(5-(5-(difluoromethoxy)pyridin-2-yl)-4-(2-fluorophenyl)-4H-1,2,4-triazol-3-yl)cyclobutyl)carbamate was prepared according to the General Procedure **D** as an off-white foam (448 mg, 91%). LC/MS (ESI) *m/z* for C<sub>23</sub>H<sub>24</sub>F<sub>3</sub>N<sub>5</sub>O<sub>3</sub> 476 ([M + H]<sup>+</sup>, calculated) 476 ([M + H]<sup>+</sup>, found).

**Step-6:** The title compound was prepared following to the General Procedure **E** and obtained as a white solid (447 mg, 100%). LC/MS (ESI) *m/z* for C<sub>18</sub>H<sub>16</sub>F<sub>3</sub>N<sub>5</sub>O 376 ([M + H]<sup>+</sup>, calculated) 376 ([M + H]<sup>+</sup>, found).

**Preparation of *trans*-3-(4-(2-fluorophenyl)-5-(pyridin-2-yl)-4H-1,2,4-triazol-3-yl)cyclobutan-1-amine dihydrochloride, intermediate for final products 30a and 30b.**

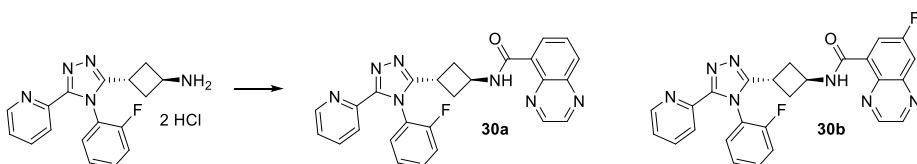

**Step-1:** *N*-(2-fluorophenyl)picolinamide was prepared following the General Procedure **A**, method a) as an off-white solid (825 mg, 76%). LC/MS (ESI) *m/z* for C<sub>12</sub>H<sub>9</sub>FN<sub>2</sub>O 217 ([M + H]<sup>+</sup>, calculated) 217 ([M + H]<sup>+</sup>, found).

**Step-2:** *N*-(2-fluorophenyl)pyridine-2-carbothioamide was prepared according to the General Procedure **B** as a yellow solid (792 mg, 89%). LC/MS (ESI) *m/z* for C<sub>12</sub>H<sub>9</sub>FN<sub>2</sub>S 233 ([M + H]<sup>+</sup>, calculated) 233 ([M + H]<sup>+</sup>, found).

**Step-3:** methyl *N*-(2-fluorophenyl)pyridine-2-carbimidothioate was prepared according to the General Procedure **C** as a yellow oil (809 mg, 97%). LC/MS (ESI) *m/z* for C<sub>13</sub>H<sub>11</sub>FN<sub>2</sub>S 247 ([M + H]<sup>+</sup>, calculated) 247 ([M + H]<sup>+</sup>, found).

**Step-4:** *tert*-butyl (*trans*-3-(4-(2-fluorophenyl)-5-(pyridin-2-yl)-4H-1,2,4-triazol-3-yl)cyclobutyl)carbamate was prepared according to the General Procedure **D** as a white solid (653 mg, 77%). LC/MS (ESI) *m/z* for C<sub>22</sub>H<sub>24</sub>FN<sub>5</sub>O<sub>2</sub> 410 ([M + H]<sup>+</sup>, calculated) 410 ([M + H]<sup>+</sup>, found).

**Step-5:** The title compound was prepared following to the General Procedure **E** and obtained as a white solid (661 mg, 100%). LC/MS (ESI) *m/z* for C<sub>17</sub>H<sub>16</sub>FN<sub>5</sub> 310 ([M + H]<sup>+</sup>, calculated) 310 ([M + H]<sup>+</sup>, found).

**Preparation of *trans*-3-(4-(2-fluorophenyl)-5-(6-methylpyridin-2-yl)-4H-1,2,4-triazol-3-yl)cyclobutan-1-amine dihydrochloride, intermediate for final products 31a and 31b.**

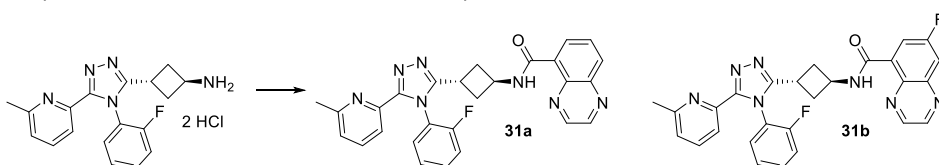

**Step-1:** *N*-(2-fluorophenyl)-6-methylpicolinamide was prepared following the General Procedure **A**, method a) as an off-white solid (519 mg, 89%). LC/MS (ESI) *m/z* for C<sub>13</sub>H<sub>11</sub>FN<sub>2</sub>O 231 ([M + H]<sup>+</sup>, calculated) 231 ([M + H]<sup>+</sup>, found).

**Step-2:** *N*-(2-fluorophenyl)-6-methylpyridine-2-carbothioamide was prepared according to the General Procedure **B** as a yellow solid (475 mg, 86%). LC/MS (ESI) *m/z* for C<sub>13</sub>H<sub>11</sub>FN<sub>2</sub>S 247 ([M + H]<sup>+</sup>, calculated) 247 ([M + H]<sup>+</sup>, found).

**Step-3:** methyl *N*-(2-fluorophenyl)-6-methylpyridine-2-carbimidothioate was prepared according to the General Procedure **C** as a yellow oil (492 mg, 99%). LC/MS (ESI) *m/z* for C<sub>14</sub>H<sub>13</sub>FN<sub>2</sub>S 260 ([M + H]<sup>+</sup>, calculated) 260 ([M + H]<sup>+</sup>, found).

**Step-4:** *tert*-butyl (*trans*-3-(4-(2-fluorophenyl)-5-(6-methylpyridin-2-yl)-4H-1,2,4-triazol-3-yl)cyclobutyl)carbamate was prepared according to the General Procedure **D** as a white solid (405 mg, 93%). LC/MS (ESI) *m/z* for C<sub>23</sub>H<sub>26</sub>FN<sub>5</sub>O<sub>2</sub> 424 ([M + H]<sup>+</sup>, calculated) 424 ([M + H]<sup>+</sup>, found).

**Step-5:** The title compound was prepared following to the General Procedure **E** and obtained as a white solid (396 mg, 100%). LC/MS (ESI) *m/z* for C<sub>18</sub>H<sub>18</sub>FN<sub>5</sub> 324 ([M + H]<sup>+</sup>, calculated) 324 ([M + H]<sup>+</sup>, found).

## NMR and LCMS spectra of final products

For spectra of final products **1 – 6**, **15a** and **15b** see the Supplementary Experimentals published earlier.<sup>1</sup>

### Compound 7

**title** PINI22-65-1  
**Method** AN\_ACID.M  
**Date acquired** 08-Jun-18, 17:11:18  
**FileName** Analysis\LCMS6\_0608\_106.D  
**Column** XSelect CSH C18 (50x2.1mm, 3.5μ) valve:3  
**Flow** 0.8 ml/min; Column temp: 35°C  
**Eluent A** 0.1% formic acid in acetonitrile  
**Eluent B** 0.1% formic acid in water  
**Gradient** t=0 min 5% A, t=3.5 min 98% A, t=6 min 98%A  
**Posttime** 2 min  
**Detection** DAD(210, 220 and 220-320nm)  
**Detection** PDA(210-320nm)  
**Detection** MSD (ESI pos/neg) mass range: 100 - 1000  
**Detection** ELSD gas temp: 40°C, flow 1.5 ml/min, gain 1

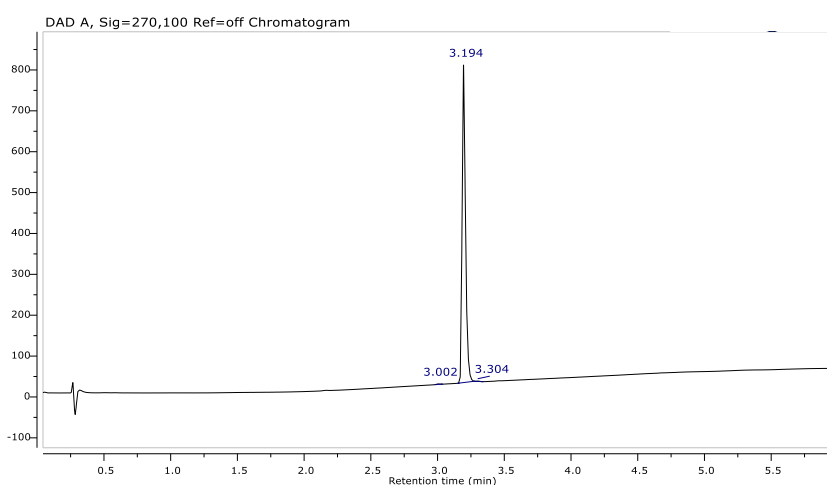

| Integrals spectrum |        | Chromatogram DAD A, Sig=270,100 |          |
|--------------------|--------|---------------------------------|----------|
| Ref=off            |        |                                 |          |
| rt (min)           | height | area                            | area (%) |
| 3.00               | 1.198  | 0.02797                         | 0.12     |
| 3.19               | 777.0  | 22.84                           | 99.75    |
| 3.30               | 1.097  | 0.02833                         | 0.12     |

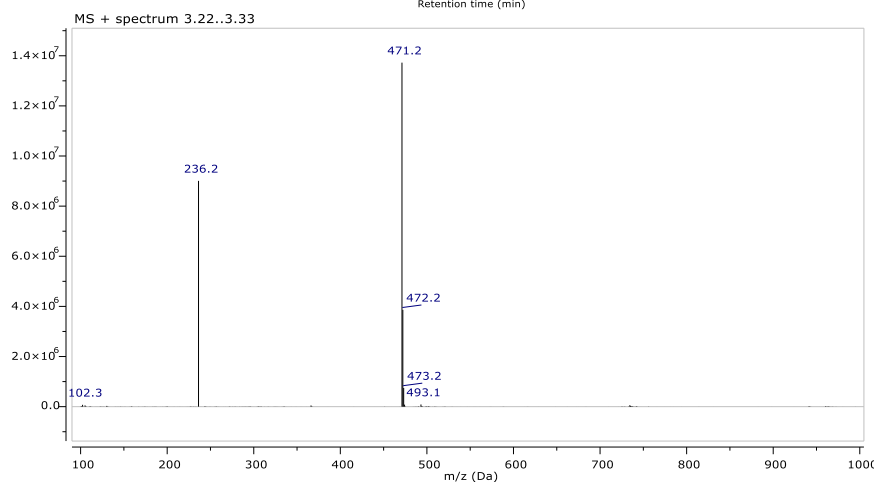

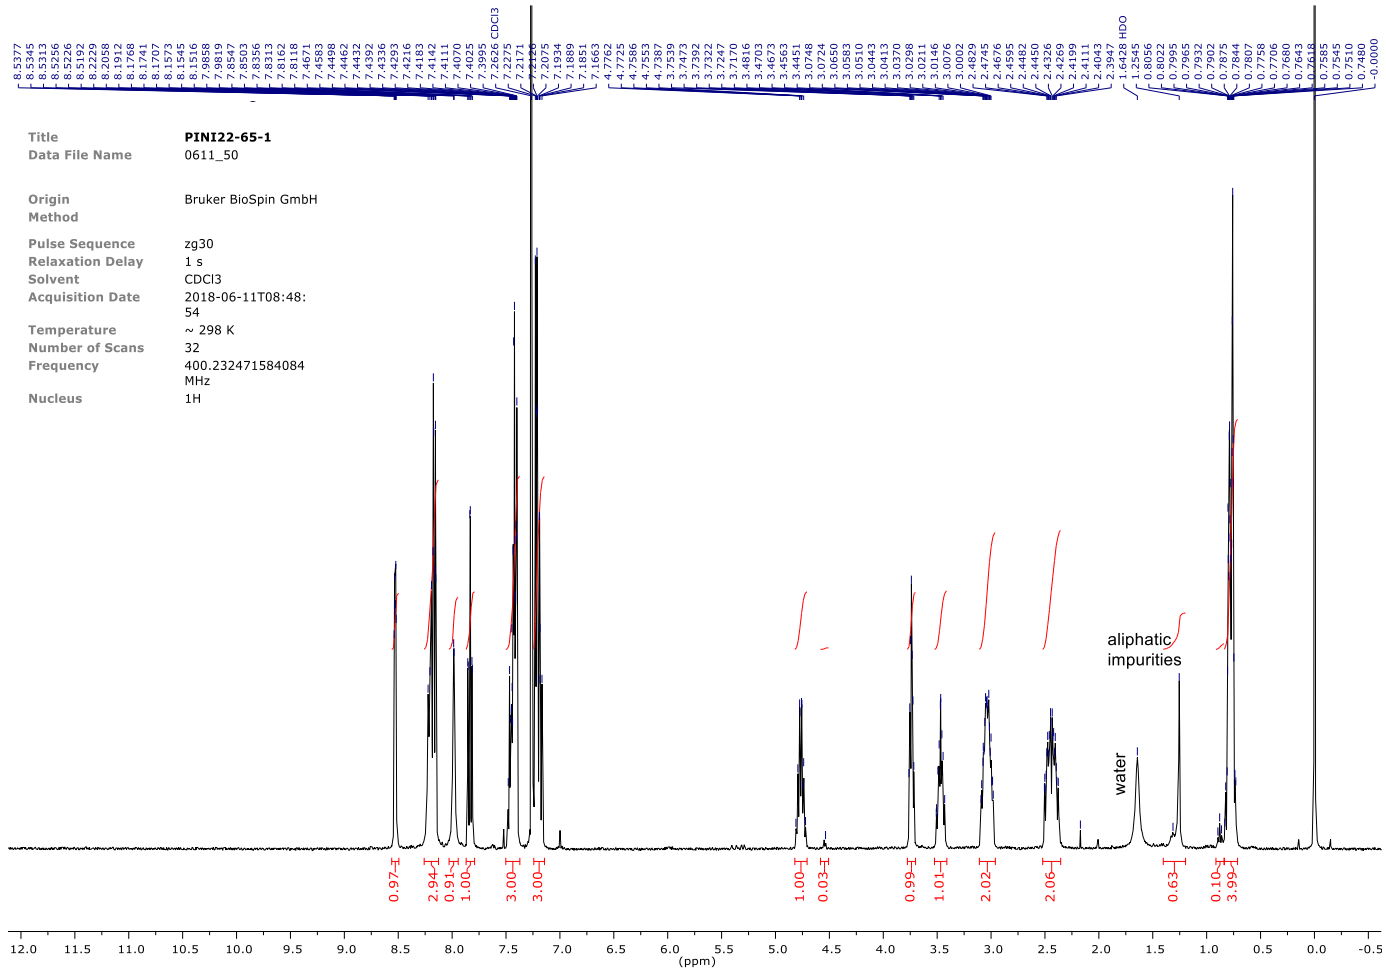

HRMS (m/z): C<sub>26</sub>H<sub>23</sub>N<sub>6</sub>O<sub>2</sub>F, [M+H]<sup>+</sup> Calc: 471.19393; found: 471.1929, Δppm -2.28

RT: 0.00 - 2.40

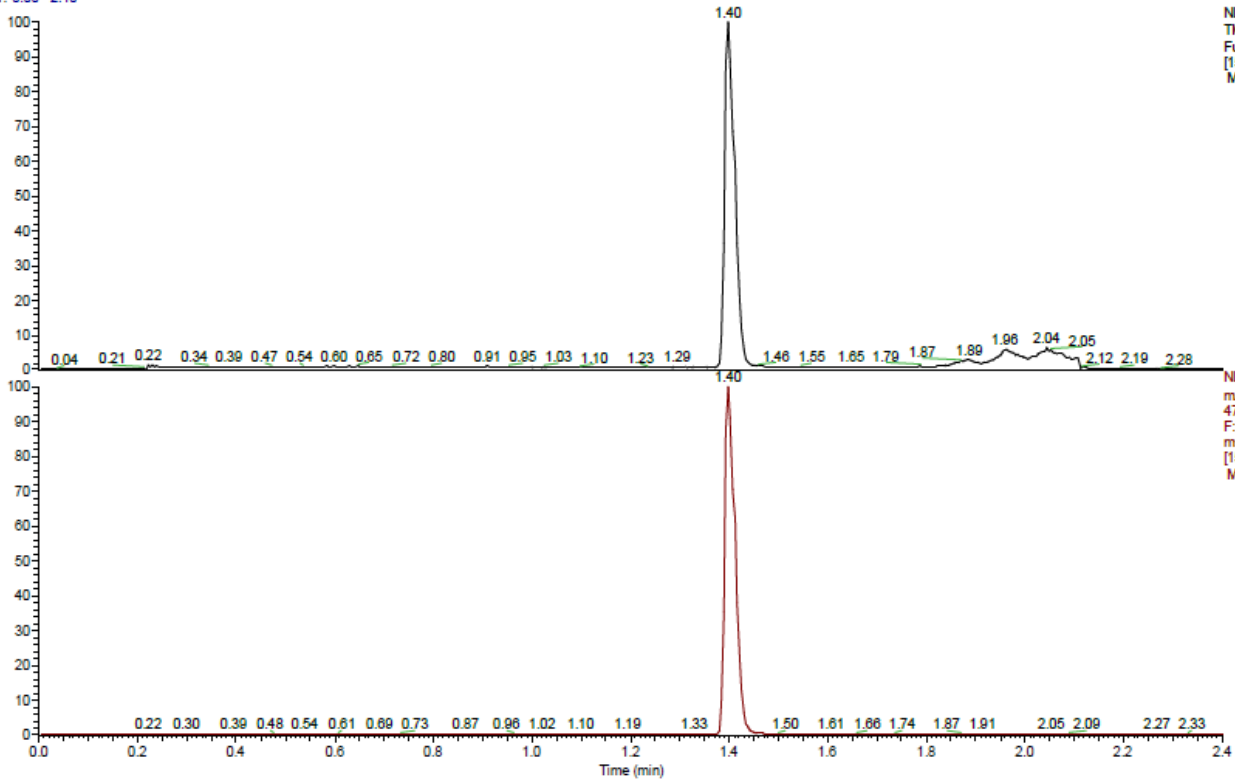

NL: 4.84E9  
TIC F: FTMS + p ESI  
Full ms  
[150.0000-2000.0000]  
MS Mix-17-c-Pr\_06

NL: 2.63E9  
m/z=  
470.69393-471.69393  
F: FTMS + p ESI Full  
ms  
[150.0000-2000.0000]  
MS Mix-17-c-Pr\_06

Mix-17-c-Pr\_06 #303-314 RT: 1.38-1.43 AV: 12 NL: 1.07E9  
T: FTMS + p ESI Full ms [150.0000-2000.0000]

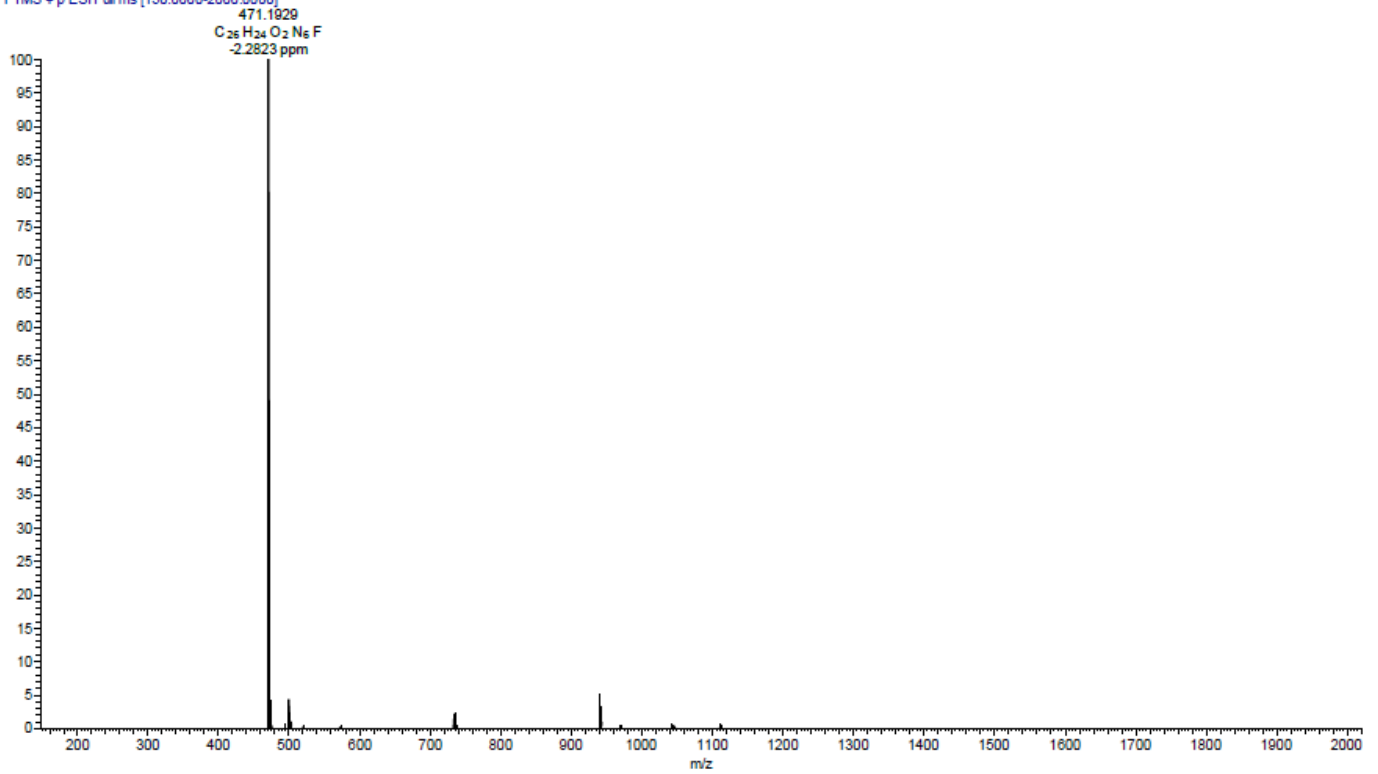

# Compound 8

title **PINI22-04-1**  
 Method AN\_ACID.M  
 Date acquired 19-Mar-18, 16:57:25  
 FileName Analysis\LCMS6\_0319\_079.D  
 Column XSelect CSH C18 (50x2.1mm, 3.5µ) valve:3  
 Flow 0.8 ml/min; Column temp: 35°C  
 Eluent A 0.1% Formic acid in acetonitrile  
 Eluent B 0.1% Formic acid in water  
 Gradient t=0 min 5% A, t=3.5 min 98% A, t=6 min 98% A  
 Posttime 2 min  
 Detection DAD (210, 220, 220-320nm)  
 Detection PDA (210-320nm)  
 Detection MSD (ESI pos/neg) mass range: 100-1000  
 Detection ELSD gas temp: 40°C, flow 1.5 ml/min gain 1

DAD A, Sig=270,100 Ref=off Chromatogram

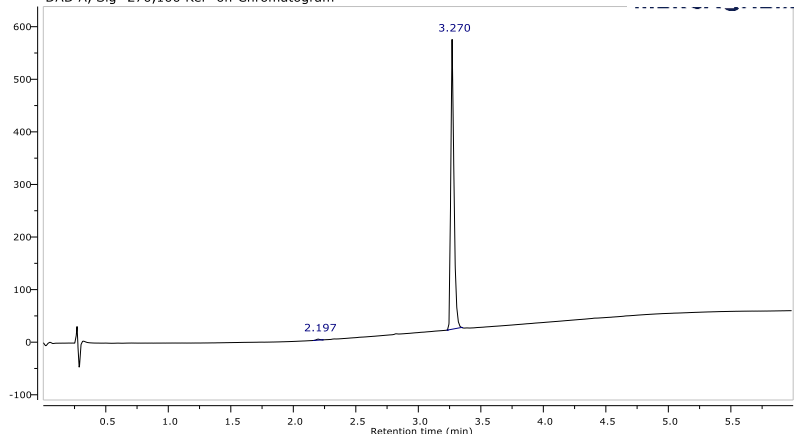

Integrals spectrum Chromatogram DAD A, Sig=270,100 Ref=off

| rt (min) | height | area    | area (%) |
|----------|--------|---------|----------|
| 2.20     | 1.988  | 0.05947 | 0.36     |
| 3.27     | 551.4  | 16.35   | 99.64    |

MS + spectrum 3.31..3.45

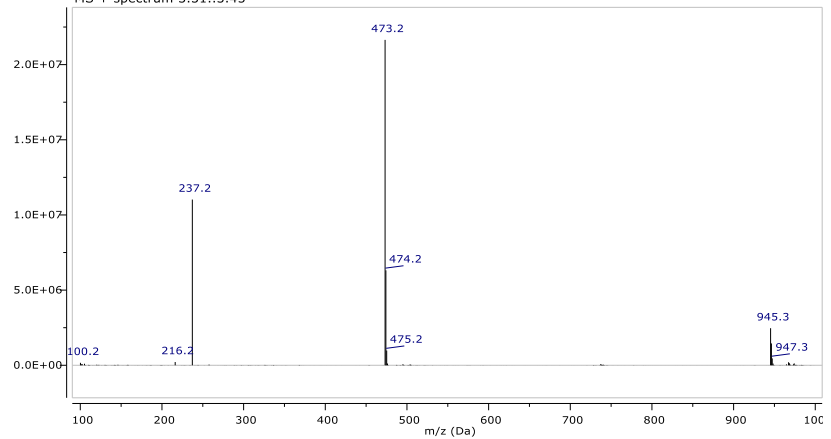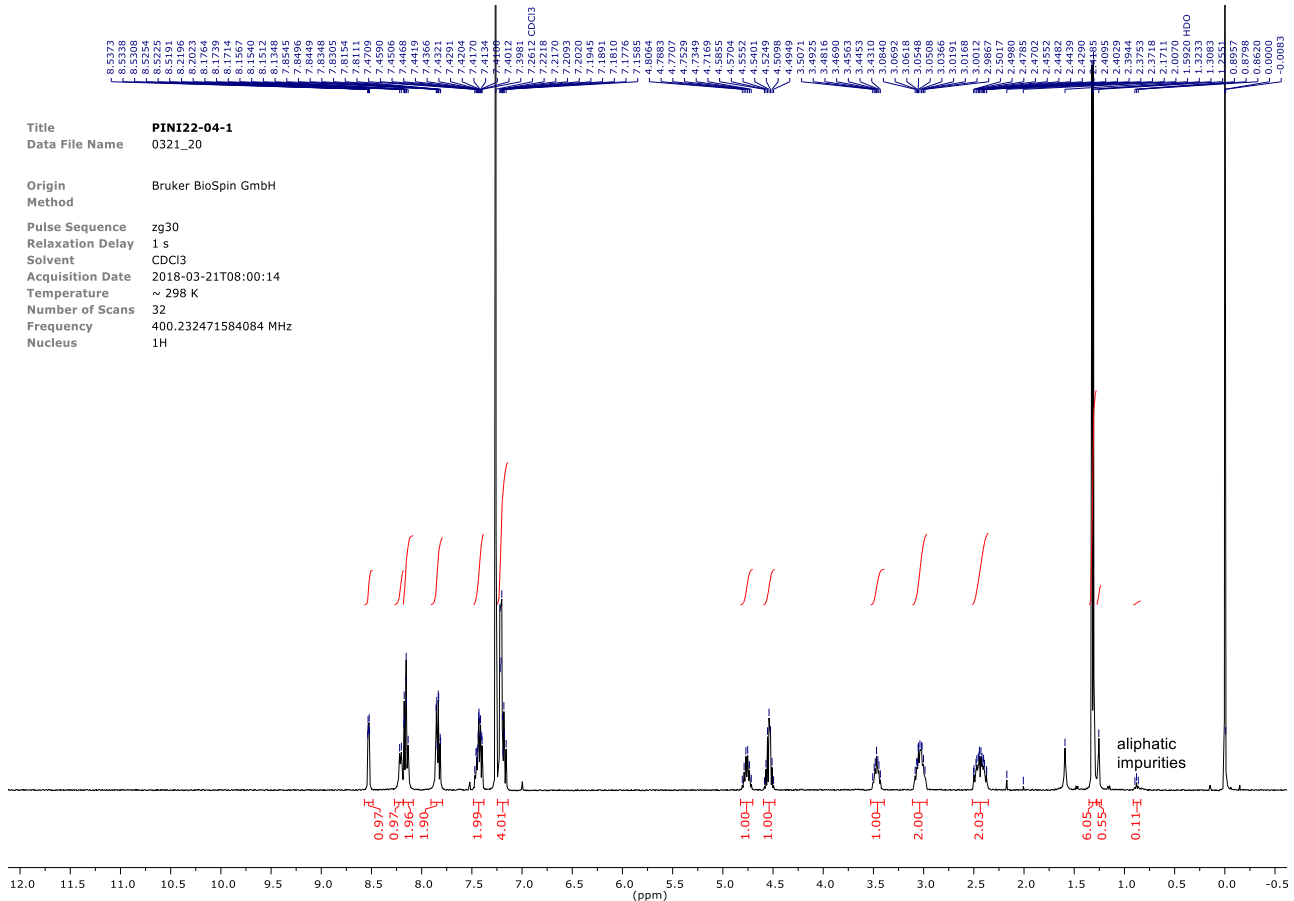



HRMS (m/z): C<sub>26</sub>H<sub>25</sub>N<sub>6</sub>O<sub>2</sub>F, [M+H]<sup>+</sup> Calc: 473.20958; found: 473.2089, Δppm -1.42

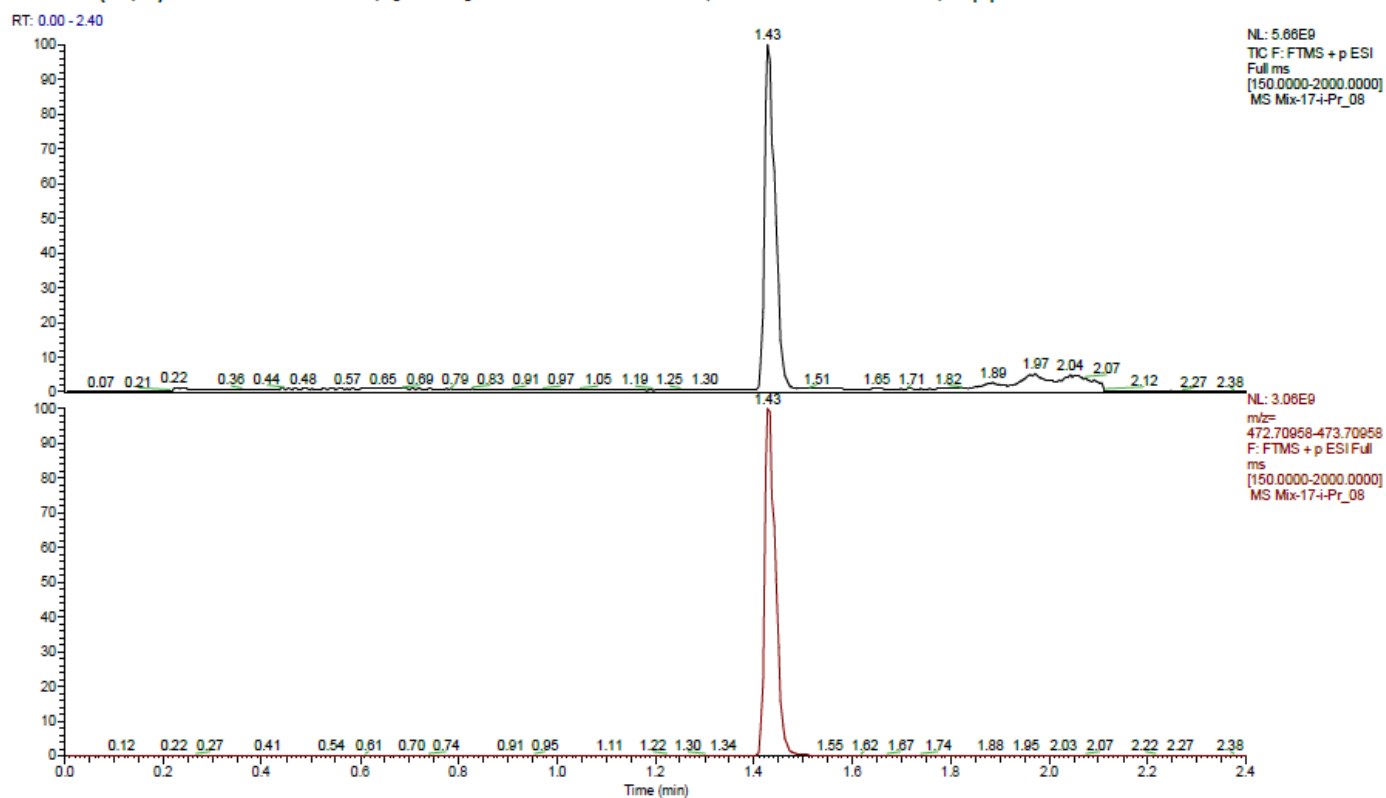

Mix-17-i-Pr\_08 #312-321 RT: 1.41-1.45 AV: 10 NL: 1.56E9  
T: FTMS + p ESI Full ms [150.0000-2000.0000]

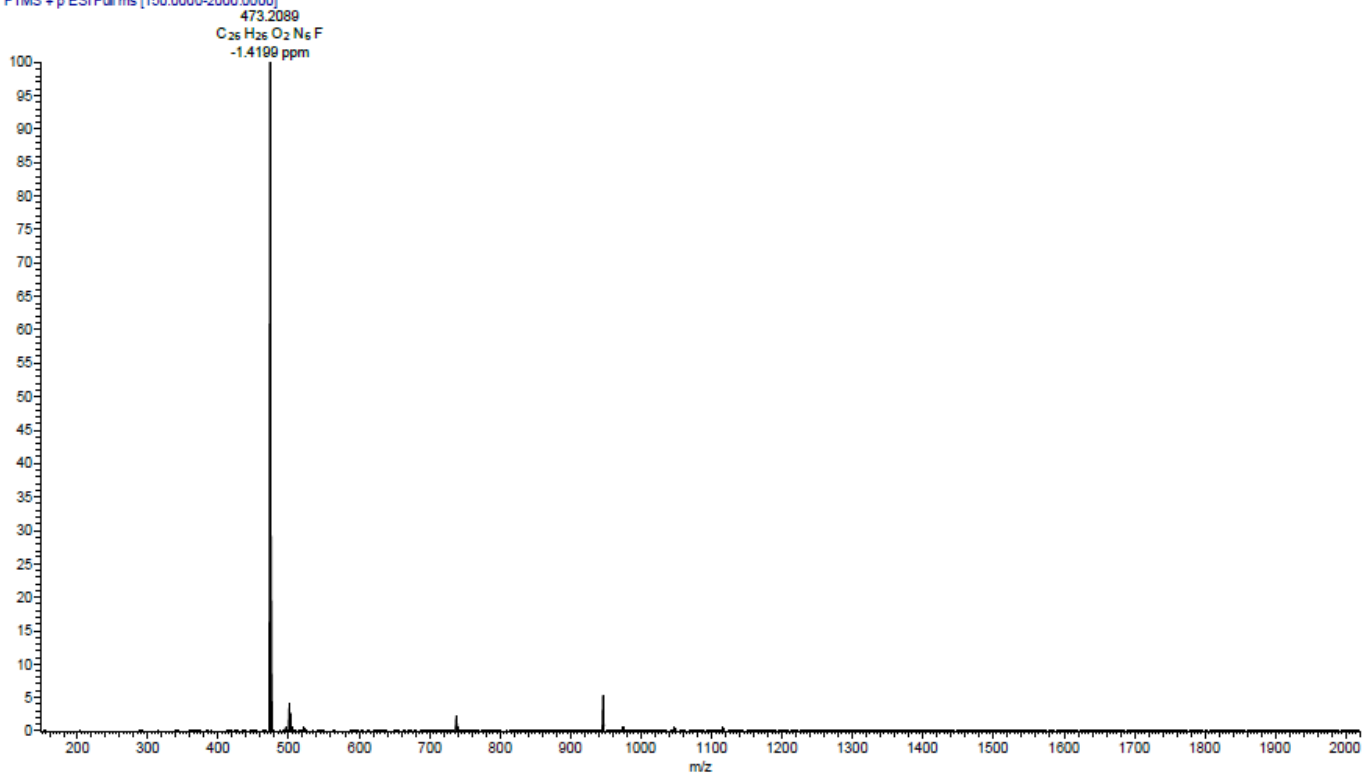

# Compound 9

**title** PINI23-12-1  
**Method** AN\_ACID.M  
**Date acquired** 29-Aug-18, 17:37:04  
**FileName** Analysis/LCMS6\_0829\_100.D  
**Column** XSelect CSH C18 (50x2.1mm, 3.5µ) valve:3  
**Flow** 0.8 ml/min; Column temp: 35°C  
**Eluent A** 0.1% formic acid in acetonitrile  
**Eluent B** 0.1% formic acid in water  
**Gradient** t=0 min 5% A, t=3.5 min 98% A, t=6 min 98%A  
**Posttime** 2 min  
**Detection** DAD(210, 220 and 220-320nm)  
**Detection** PDA(210-320nm)  
**Detection** MSD (ESI pos/neg) mass range: 100 - 1000  
**Detection** ELSD gas temp: 40°C, flow 1.5 ml/min, gain 1

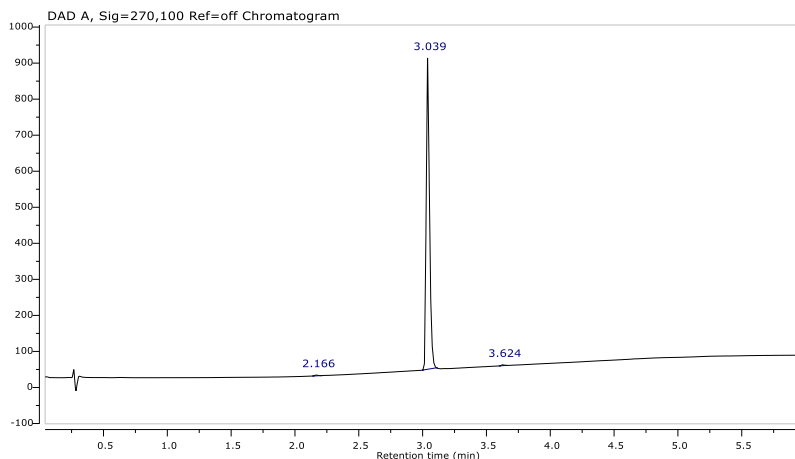

Integrals spectrum Chromatogram DAD A, Sig=270,100 Ref=off

| rt (min) | height | area    | area (%) |
|----------|--------|---------|----------|
| 2.17     | 2.131  | 0.06417 | 0.25     |
| 3.04     | 863.9  | 26.04   | 99.52    |
| 3.62     | 2.476  | 0.06064 | 0.23     |

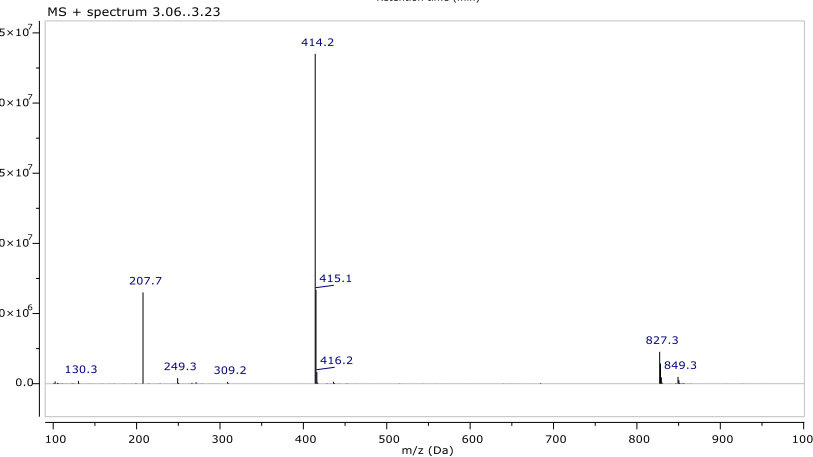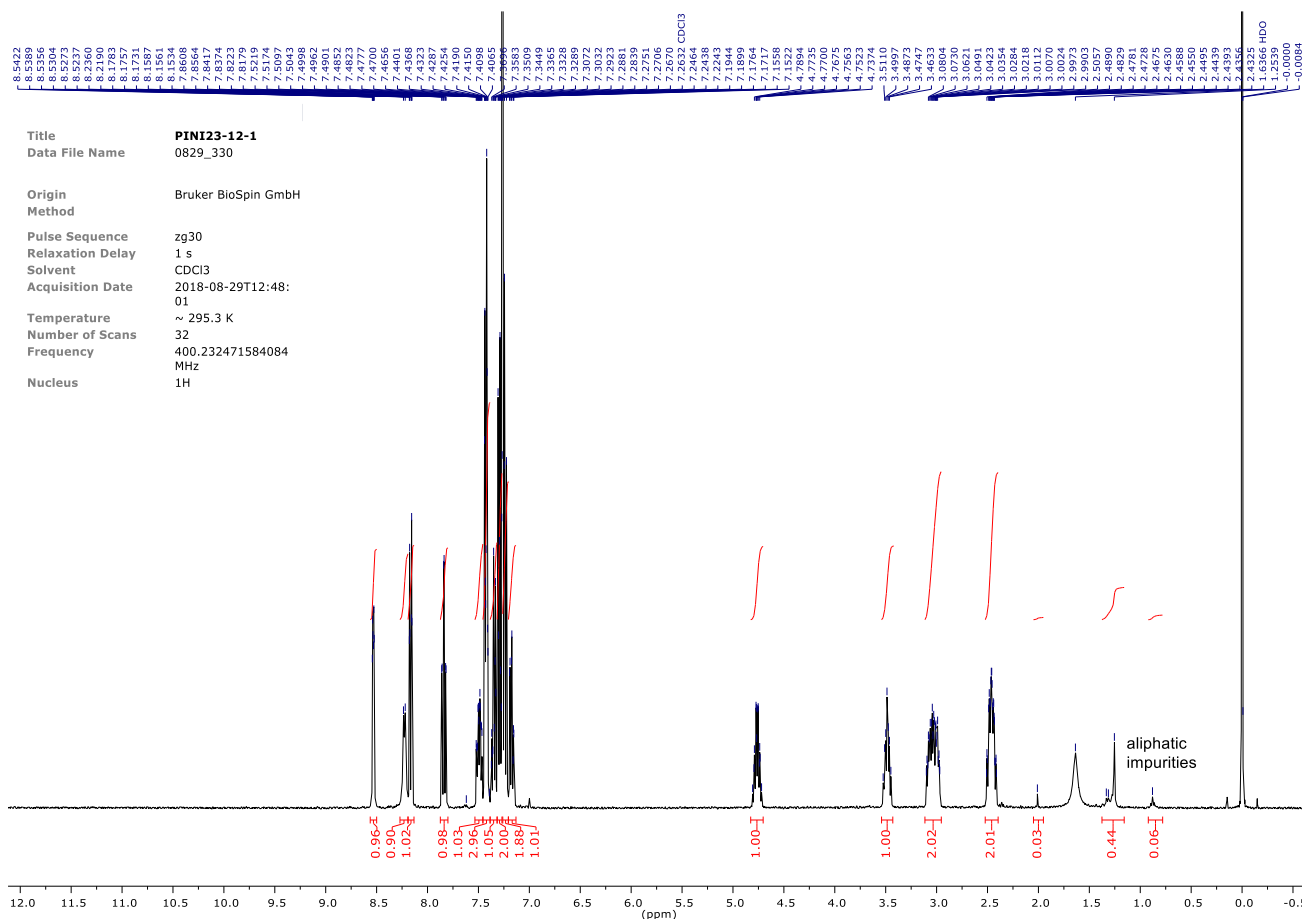

HRMS (m/z): C<sub>24</sub>H<sub>20</sub>N<sub>5</sub>O<sub>5</sub>F, [M+H]<sup>+</sup> Calc 414.17246; found: 414.1714, Δppm -2.46

RT: 0.00 - 2.40

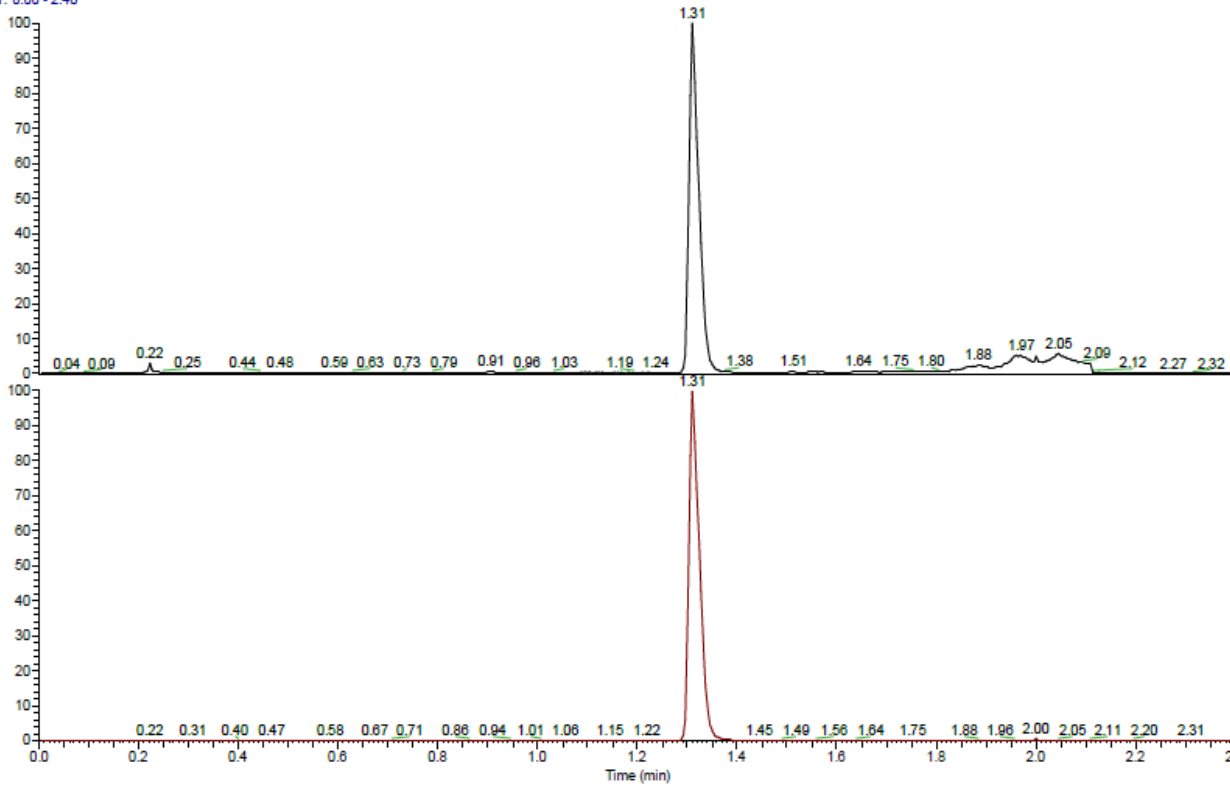

NL: 6.05E9  
TIC F: FTMS + p ESI  
Full ms  
[150.0000-  
2000.0000] MS  
Mix-86a\_08

NL: 3.64E9  
m/z=  
413.67246-  
414.67246 F: FTMS  
+ p ESI Full ms  
[150.0000-  
2000.0000] MS  
Mix-86a\_08

Mix-86a\_08 #285-294 RT: 1.30-1.34 AV: 10 NL: 1.72E9  
T: FTMS + p ESI Full ms [150.0000-2000.0000]

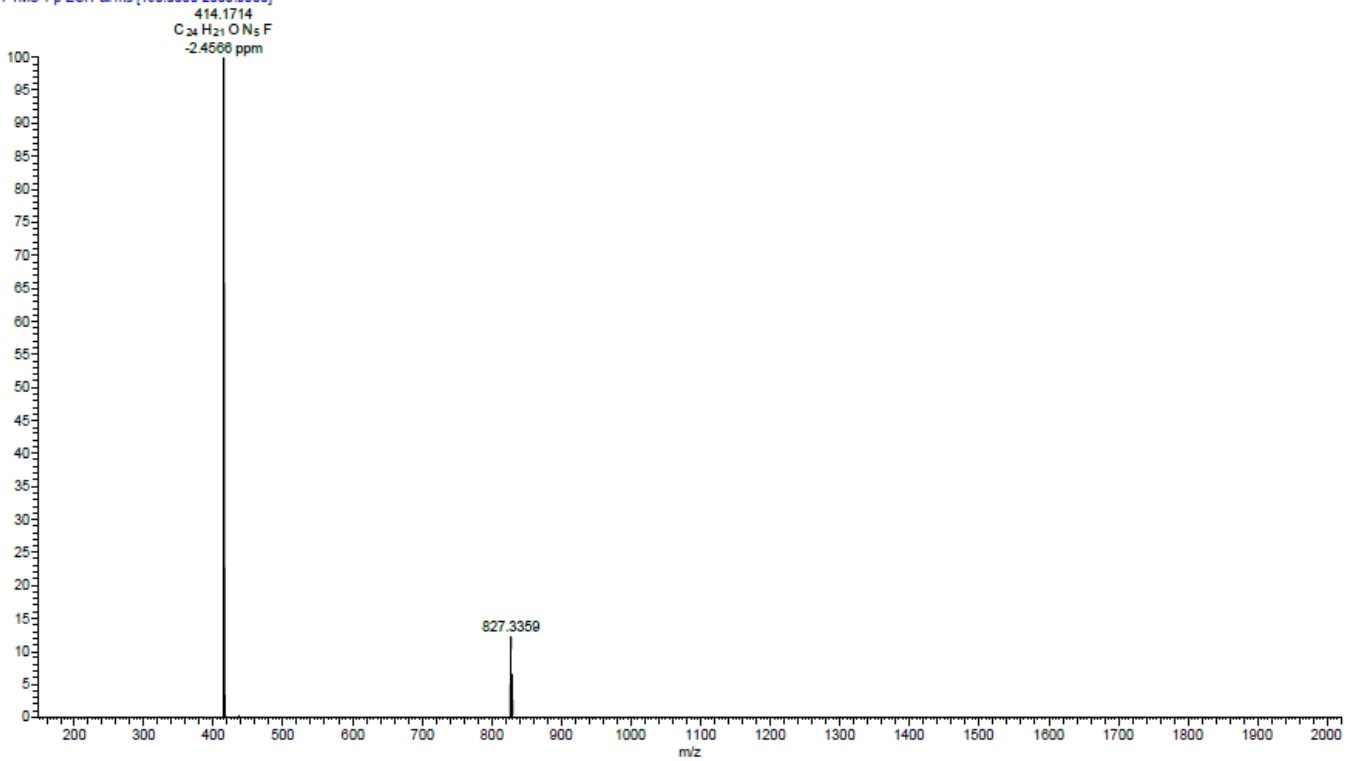

# Compound 10

**title** sjae 54 204-2  
**Method** AN\_BASE.M  
**Date acquired** 27-Nov-17, 17:49:51  
**FileName** Analysis\LCMS5\_1127\_039.D  
**Acq. method** AN\_BASE valve: 2  
**Column** Waters XSelect CSH C18 (50x2.1mm, 3.5µ)  
**Flow** 0.8 ml/min; Column temp: 25°C  
**Eluent A** 95% acetonitrile + 5% 10 mM ammoniumbicarbonate in water  
**Eluent B** 10mM ammoniumbicarbonate in water  
**Lin. Gradient** t=0 min 5% A, t=3.5 min 98% A, t=6 min 98% A  
**Posttime** 2 min  
**Detection** DAD (210, 220 and 220-320 nm)  
**Detection** PDA (210-320 nm)  
**Detection** MSD (ESI pos/neg) mass range: 100-800

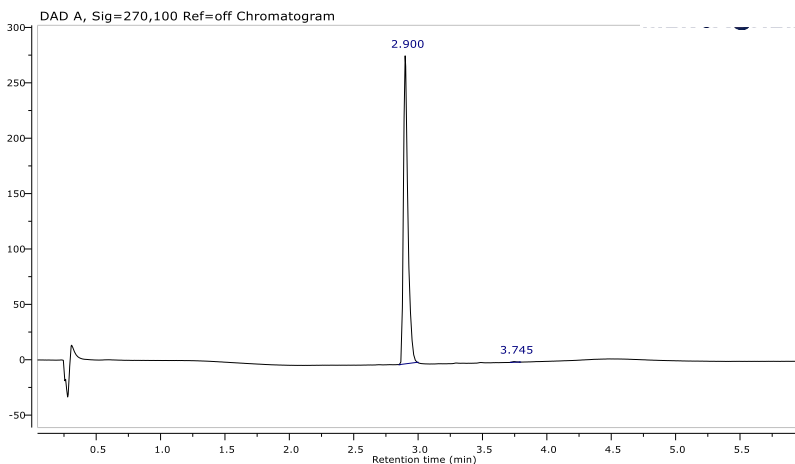

Integrals spectrum Chromatogram DAD A, Sig=270,100 Ref=off

| rt (min) | height | area    | area (%) |
|----------|--------|---------|----------|
| 2.90     | 278.2  | 10.97   | 99.81    |
| 3.75     | 0.6238 | 0.02094 | 0.19     |

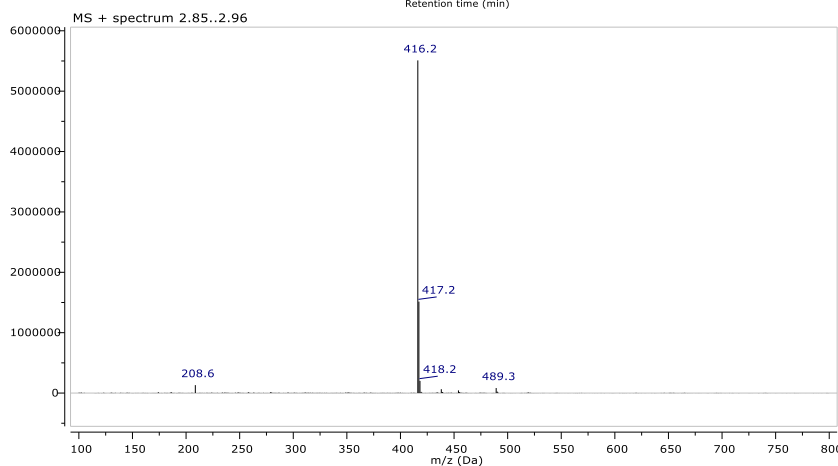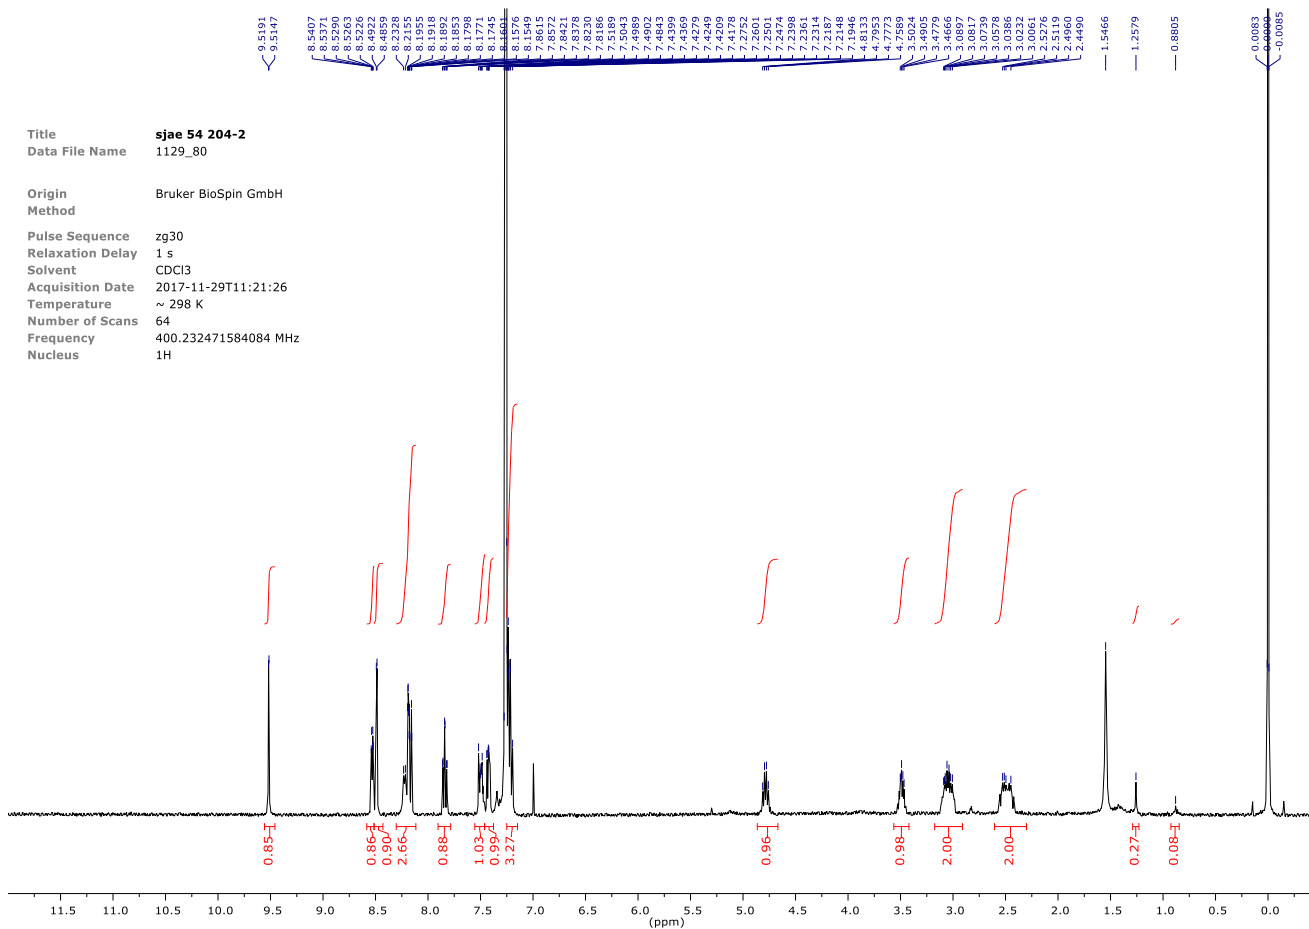

HRMS (m/z): C<sub>22</sub>H<sub>18</sub>N<sub>7</sub>O<sub>7</sub>F, [M+H]<sup>+</sup> Calc: 416.16296; found: 416.1620, Δppm -2.40

RT: 0.00 - 2.40

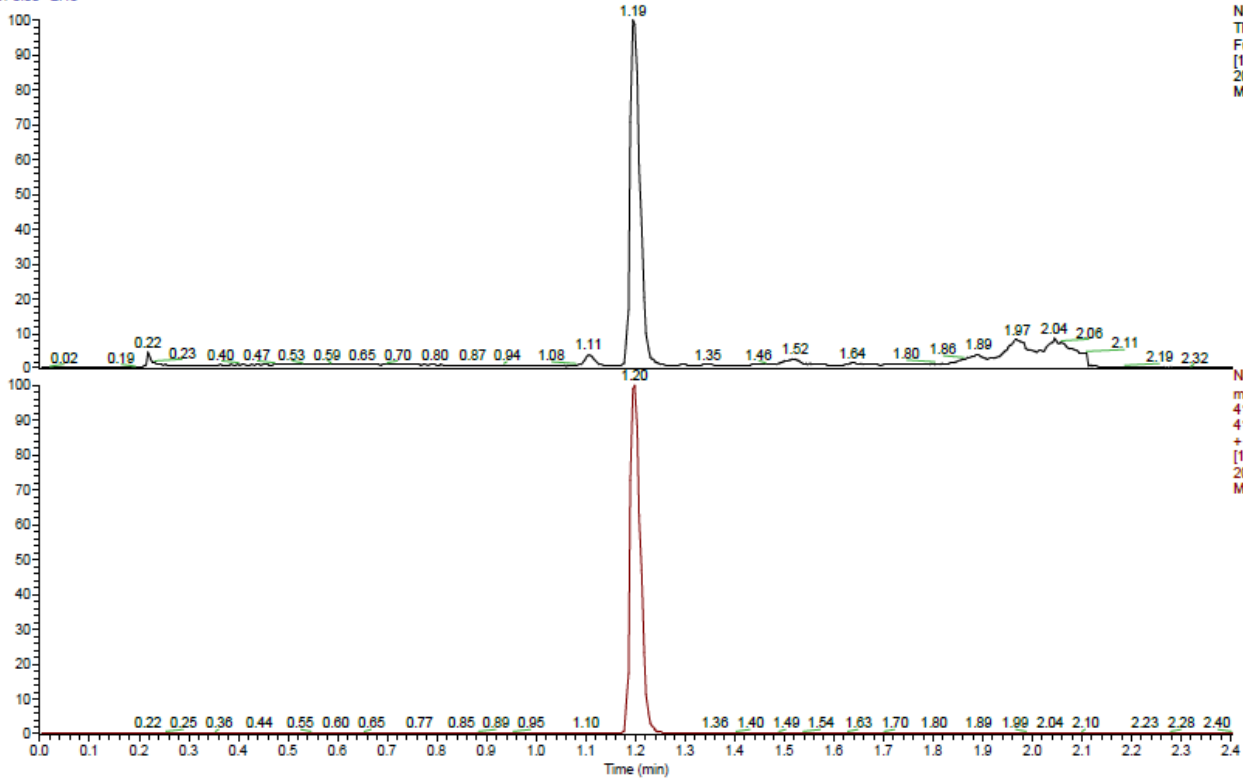

Mix-55 18 #261-268 RT: 1.19-1.22, AV: 8, NL: 1.32E9  
T: FTMS + p ESI Full ms [150.0000-2000.0000]

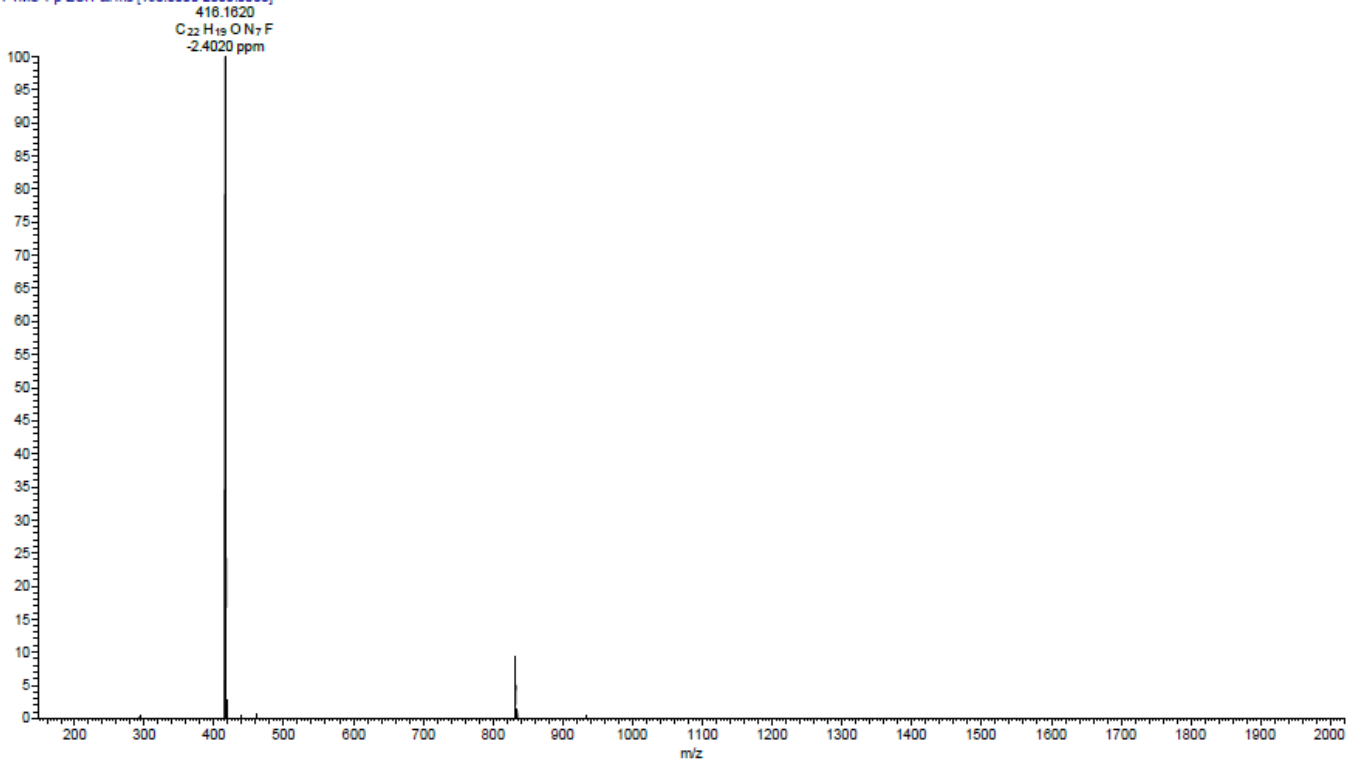

# Compound 11

title **sjae 54 172-3**  
 Method AN\_BASE.M  
 Date acquired 03-Nov-17, 16:28:52  
 FileName Analysis/LCMS5\_1103\_053.D  
 Acq. method AN\_BASE valve: 2  
 Column Waters XSelect CSH C18 (50x2.1mm, 3.5µ)  
 Flow 0.8 ml/min; Column temp: 25°C  
 Eluent A 95% acetonitrile + 5% 10 mM ammoniumbicarbonate in water  
 Eluent B 10mM ammoniumbicarbonate in water  
 Lin. Gradient t=0 min 5% A, t=3.5 min 98% A, t=6 min 98% A  
 Posttime 2 min  
 Detection DAD (220-320 nm)  
 Detection PDA (200-400 nm)  
 Detection MSD (ESI pos/neg) mass range: 100-800

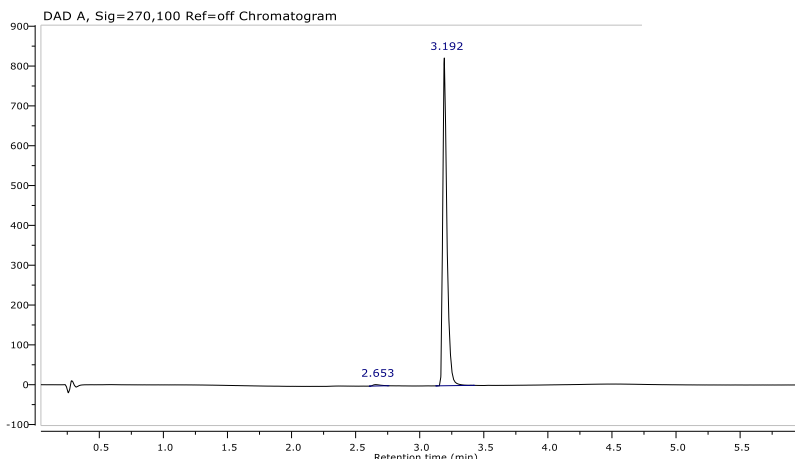

Integrals spectrum Chromatogram DAD A, Sig=270,100 Ref=off

| rt (min) | height | area   | area (%) |
|----------|--------|--------|----------|
| 2.65     | 3.445  | 0.2334 | 0.74     |
| 3.19     | 823.3  | 31.22  | 99.26    |

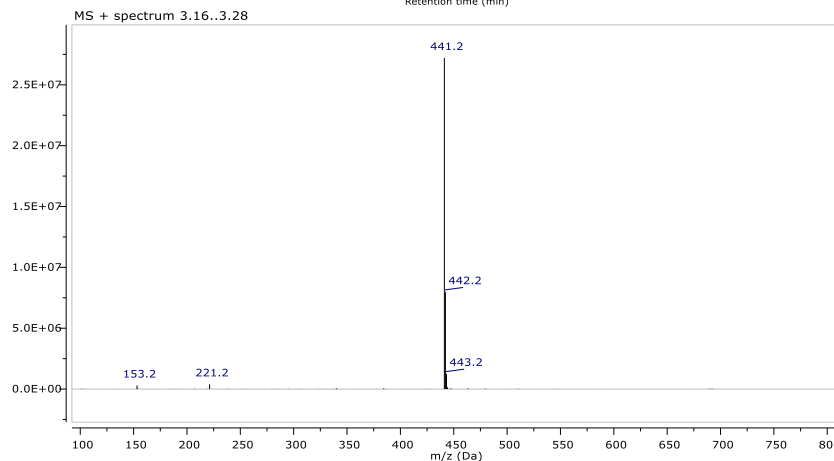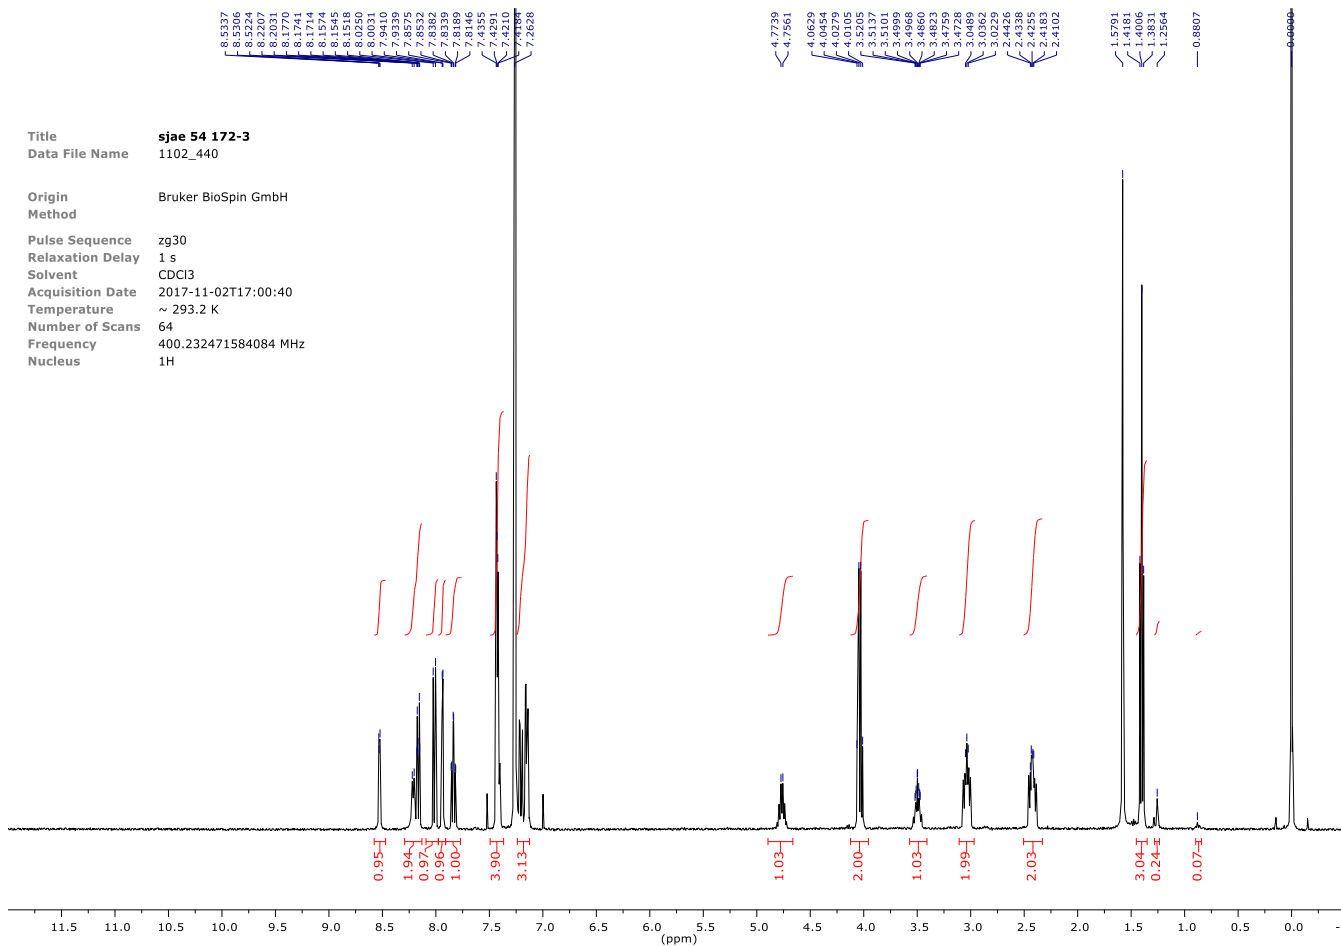

HRMS (m/z): C<sub>25</sub>H<sub>24</sub>N<sub>6</sub>O<sub>2</sub>, [M+H]<sup>+</sup> Calc: 441.20335; found: 441.2025, Δppm -1.86

RT: 0.00 - 2.40

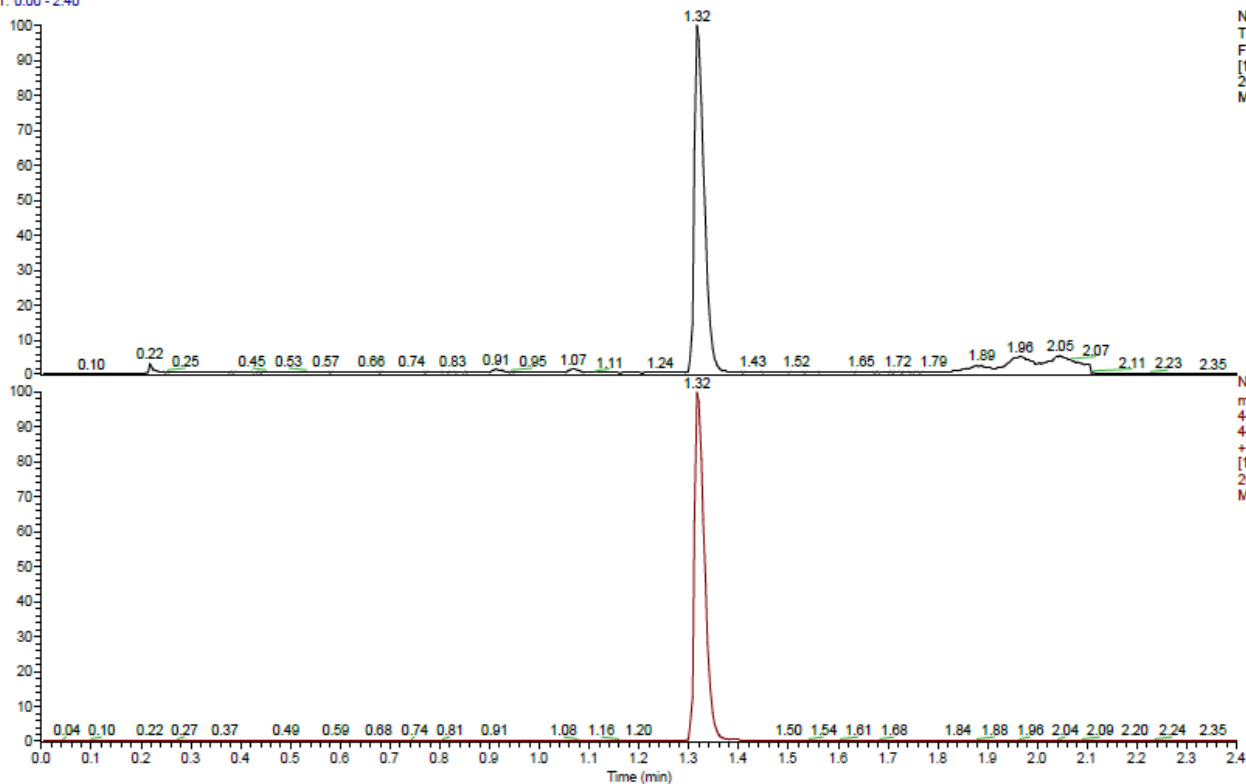

NL: 5.19E9  
TIC F: FTMS + p ESI  
Full ms  
[150.0000-  
2000.0000] MS  
Mix-26\_10

NL: 2.75E9  
m/z=  
440.70335-  
441.70335 F: FTMS  
+ p ESI Full ms  
[150.0000-  
2000.0000] MS  
Mix-26\_10

Mix-26\_10 #287-296 RT: 1.30-1.34 AV: 10 NL: 1.28E9  
T: FTMS + p ESI Full ms [150.0000-2000.0000]

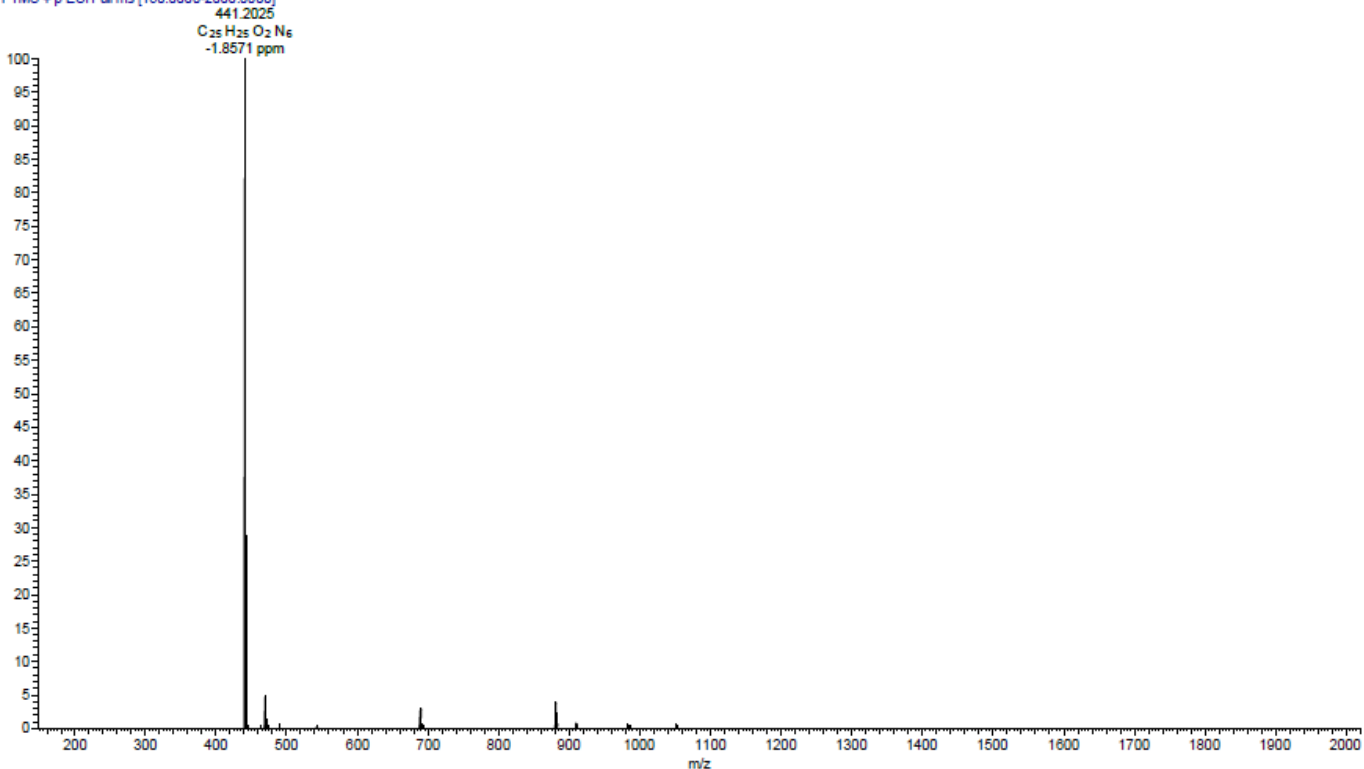

# Compound 12

**title** PINI21-74-1  
**Method** AN\_ACID.M  
**Date acquired** 07-Feb-18, 19:06:26  
**FileName** Analysis\LCMS6\_0207\_129.D  
**Column** XSelect CSH C18 (50x2.1mm, 3.5µ) valve:3  
**Flow** 0.8 ml/min; Column temp: 35°C  
**Eluent A** 0.1% Formic acid in acetonitrile  
**Eluent B** 0.1% Formic acid in water  
**Gradient** t=0 min 5% A, t=3.5 min 98% A, t=6 min 98% A  
**Posttime** 2 min  
**Detection** DAD (210, 220, 220-320nm)  
**Detection** PDA (210-320nm)  
**Detection** MSD (ESI pos/neg) mass range: 100-800  
**Detection** CAD Temp. 40°C, Iontrap 20.2 V, chargevoltage 2.64 kV

DAD A, Sig=270,100 Ref=off Chromatogram

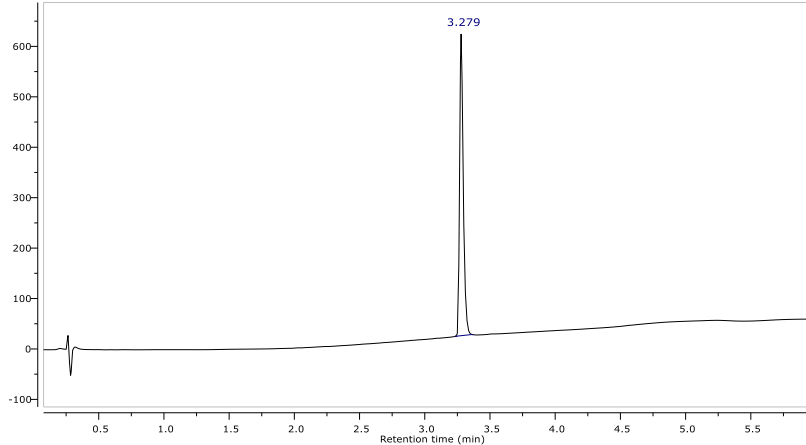

**Integrals spectrum** Chromatogram DAD A, Sig=270,100 Ref=off  

| rt (min) | height | area  | area (%) |
|----------|--------|-------|----------|
| 3.28     | 598.3  | 19.37 | 100.00   |

MS + spectrum 3.28..3.43

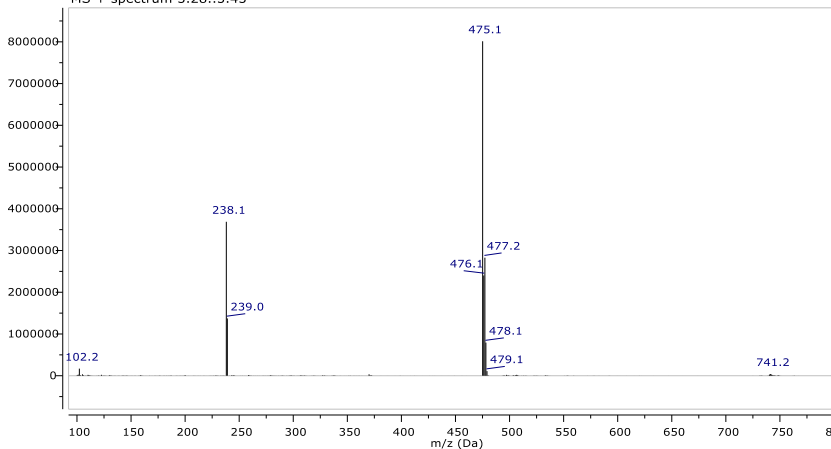

8.5451  
 8.5397  
 8.5366  
 8.5311  
 8.5260  
 8.5232  
 8.2158  
 8.1796  
 8.1746  
 8.1601  
 8.1576  
 8.1088  
 8.0870  
 7.9323  
 7.8539  
 7.8389  
 7.8345  
 7.8154  
 7.6268  
 7.4403  
 7.4336  
 7.4253  
 7.4217  
 7.4189  
 7.4115  
 7.4062  
 7.3818  
 7.3804  
 7.3446  
 7.2318  
 7.2315  
 7.2215  
 7.1846  
 7.1832  
 7.1781  
 7.0782  
 7.0722  
 7.0593  
 7.0560  
 4.8261  
 4.8087  
 4.7907  
 4.7547  
 4.7372  
 4.0801  
 4.0453  
 4.0279  
 3.5125  
 3.4895  
 3.4762  
 3.4632  
 3.4520  
 3.0635  
 3.0573  
 3.0494  
 3.0309  
 3.0172  
 3.0107  
 2.9970  
 2.4897  
 2.4826  
 2.4661  
 2.44576  
 2.4502  
 2.4336  
 2.4241  
 2.4183  
 2.4163  
 1.6008 H<sub>2</sub>O  
 1.4272  
 1.4099  
 1.3843  
 1.3547  
 1.3328  
 0.8871  
 0.0000

**Title** PINI21-74-1  
**Data File Name** 0208\_230  
**Origin** Bruker BioSpin GmbH  
**Method**  
**Pulse Sequence** zg30  
**Relaxation Delay** 1 s  
**Solvent** CDCl<sub>3</sub>  
**Acquisition Date** 2018-02-08T11:32:37  
**Temperature** ~ 298 K  
**Number of Scans** 64  
**Frequency** 400.232471584084 MHz  
**Nucleus** 1H

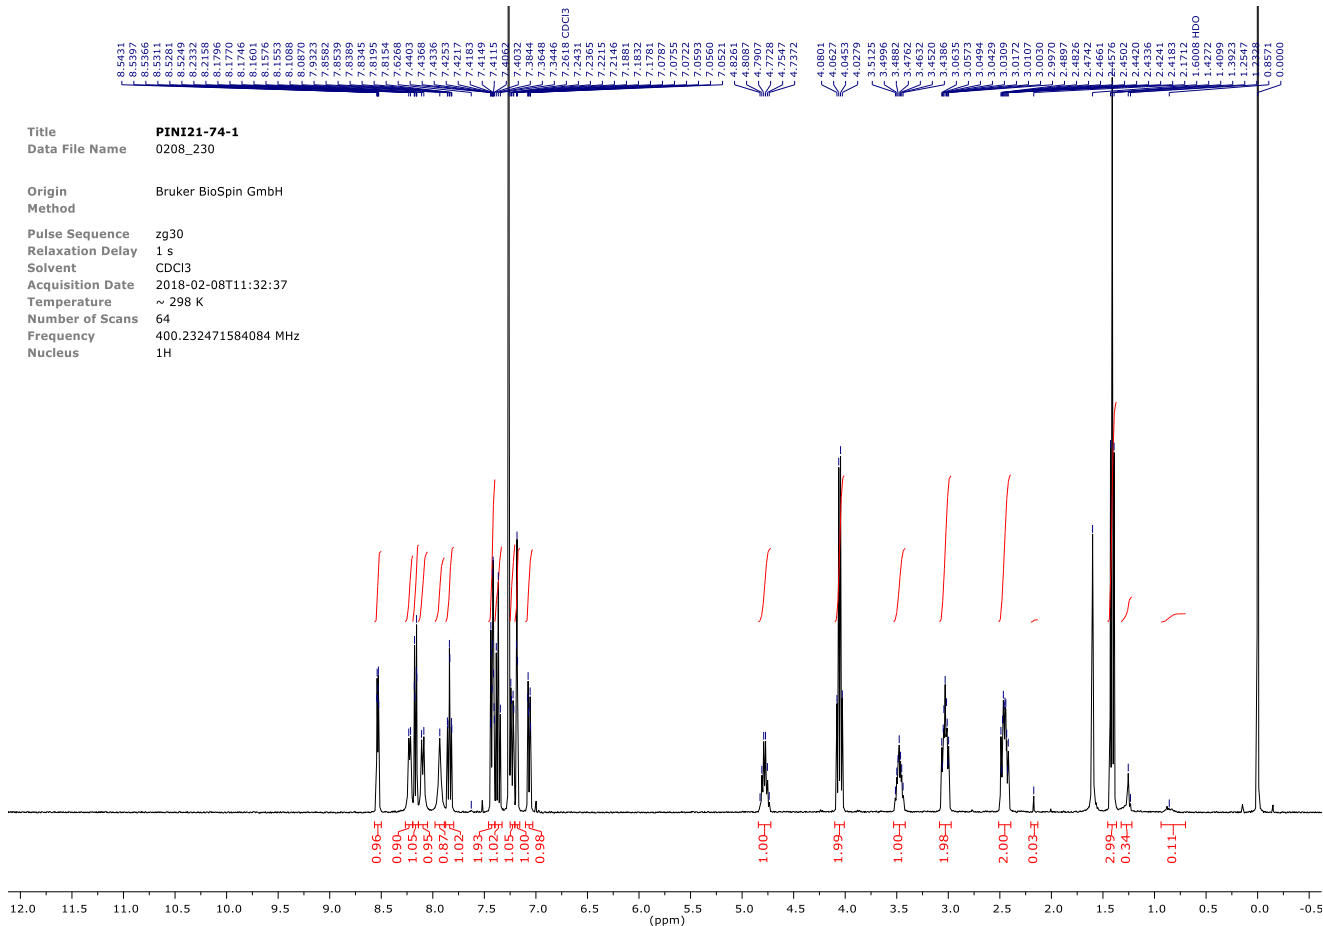



HRMS (m/z): C<sub>25</sub>H<sub>23</sub>N<sub>6</sub>O<sub>2</sub>Cl, [M+H]<sup>+</sup> Calc: 475.16438; found: 475.1636, Δppm -1.73

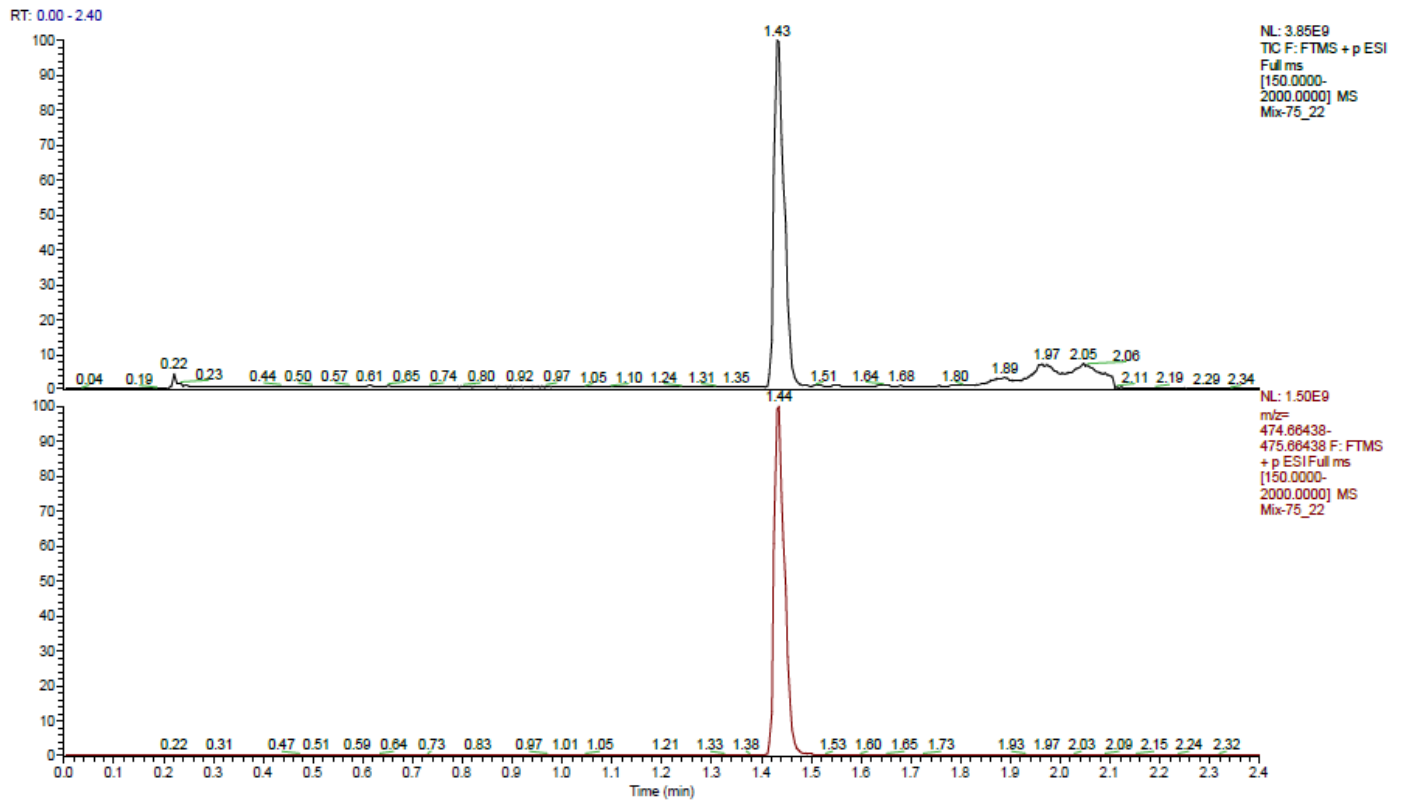

Mix-75\_22 #311-319 RT: 1.42-1.46 AV: 9 NL: 7.81E8  
T: FTMS + pESI Full ms [150.0000-2000.0000]

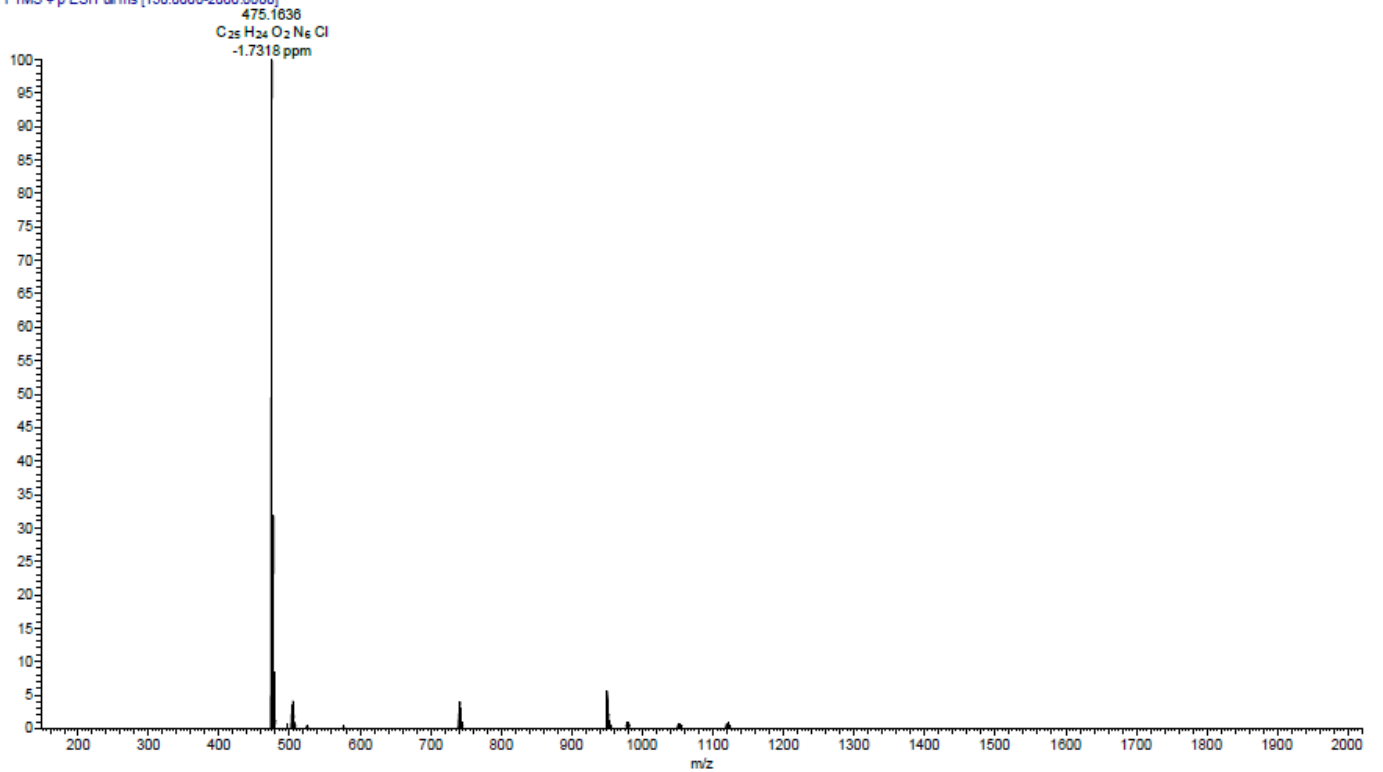

# Compound 13

title **sjae 54 184-3**  
 Method AN\_BASE.M  
 Date acquired 13-Nov-17, 17:25:02  
 FileName Analysis\LCMS5\_1113\_064.D  
 Acq. method AN\_BASE valve: 2  
 Column Waters XSelect CSH C18 (50x2.1mm, 3.5µ)  
 Flow 0.8 ml/min; Column temp: 25°C  
 Eluent A 95% acetonitrile + 5% 10 mM ammoniumbicarbonate in water  
 Eluent B 10mM ammoniumbicarbonate in water  
 Lin. Gradient t=0 min 5% A, t=3.5 min 98% A, t=6 min 98% A  
 Posttime 2 min  
 Detection DAD (210, 220 and 220-320 nm)  
 Detection PDA (210-320 nm)  
 Detection MSD (ESI pos/neg) mass range: 100-800

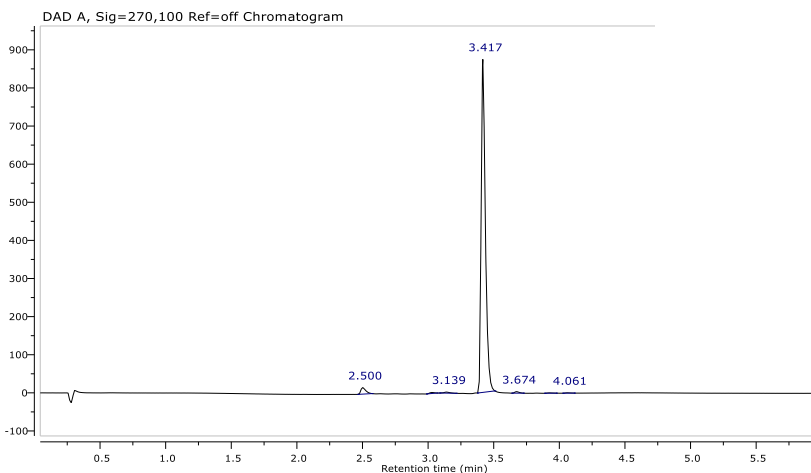

| rt (min) | height | area    | area (%) |
|----------|--------|---------|----------|
| 2.50     | 17.10  | 0.7428  | 2.22     |
| 3.03     | 2.693  | 0.1106  | 0.33     |
| 3.14     | 2.710  | 0.1349  | 0.40     |
| 3.42     | 873.8  | 32.30   | 96.37    |
| 3.67     | 3.915  | 0.1506  | 0.45     |
| 3.92     | 0.8755 | 0.03837 | 0.11     |
| 4.06     | 0.9464 | 0.03974 | 0.12     |

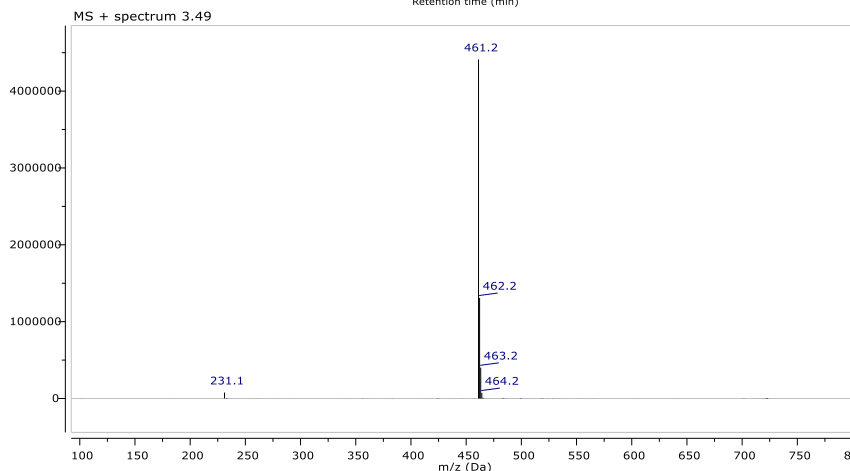

8.5539, 8.5432, 8.1955, 8.1907, 8.1768, 8.1719, 8.1711, 8.1238, 8.1165, 7.9609, 7.8505, 7.8461, 7.4458, 7.4339, 7.2622, 7.2229, 7.2203, 7.2086, 7.1993, 6.7003, 6.6248, 6.6159, 6.6125, 4.8039, 4.7860, 4.7678, 4.7362, 4.1041, 4.0897, 4.0518, 3.6170, 3.6141, 3.6028, 3.0773, 3.0643, 3.0530, 2.5244, 2.5164, 2.5008, 2.4923, 2.4758, 2.2245, 1.5741, 1.4266, 1.4091, 1.2858, 1.2357, 0.8801

Title **sjae 54 184-3**  
 Data File Name 1115\_210  
 Origin Bruker BioSpin GmbH  
 Method  
 Pulse Sequence zg30  
 Relaxation Delay 1 s  
 Solvent CDCl3  
 Acquisition Date 2017-11-15T12:58:31  
 Temperature ~ 293.5 K  
 Number of Scans 64  
 Frequency 400.232471584084 MHz  
 Nucleus 1H

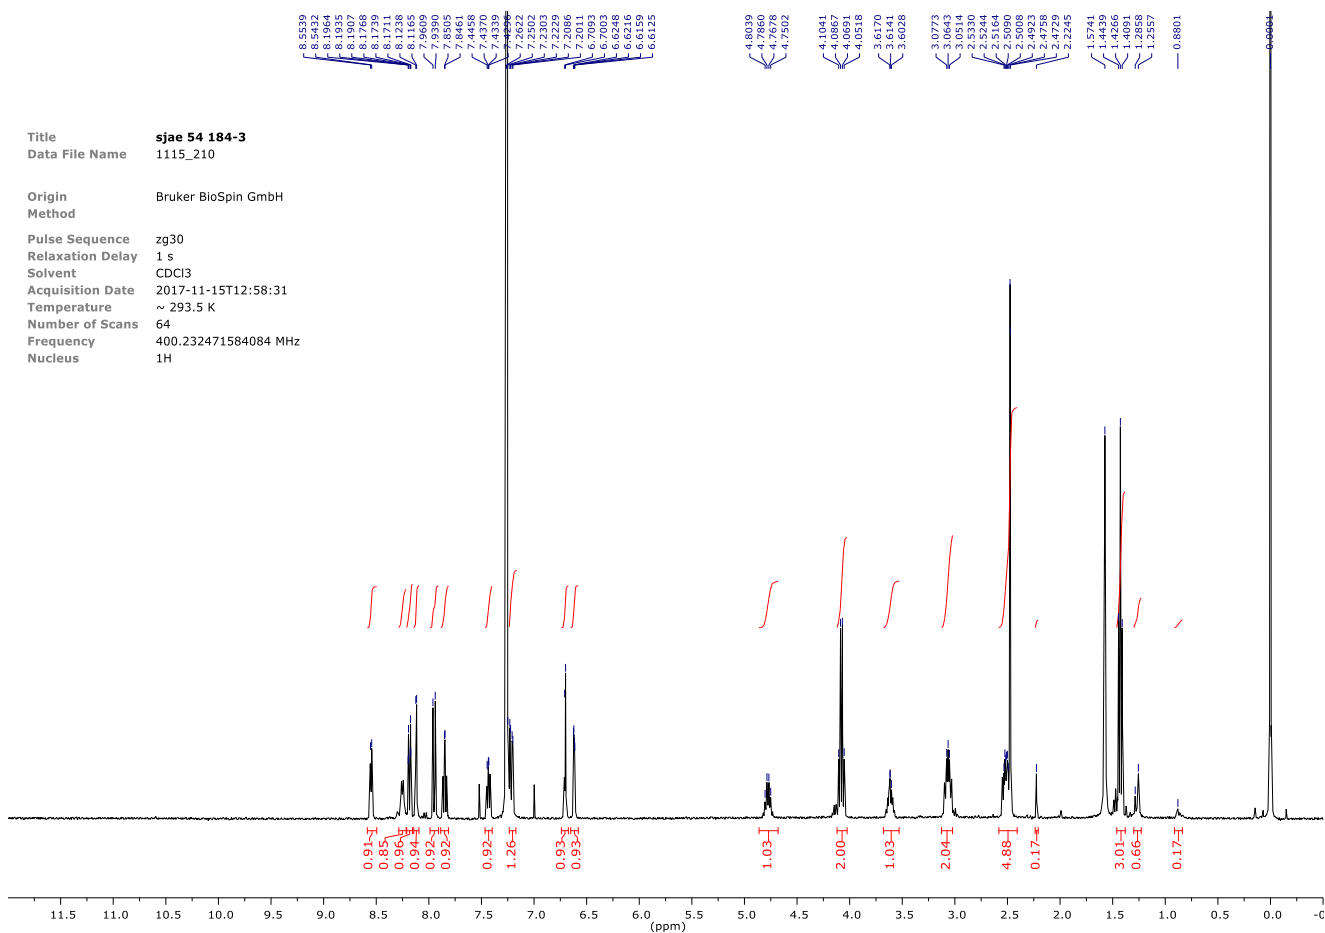

HRMS (m/z): C<sub>24</sub>H<sub>24</sub>N<sub>6</sub>O<sub>2</sub>S, [M+H]<sup>+</sup> Calc: 461.17542; found: 461.1746, Δppm -1.85

RT: 0.00 - 2.40

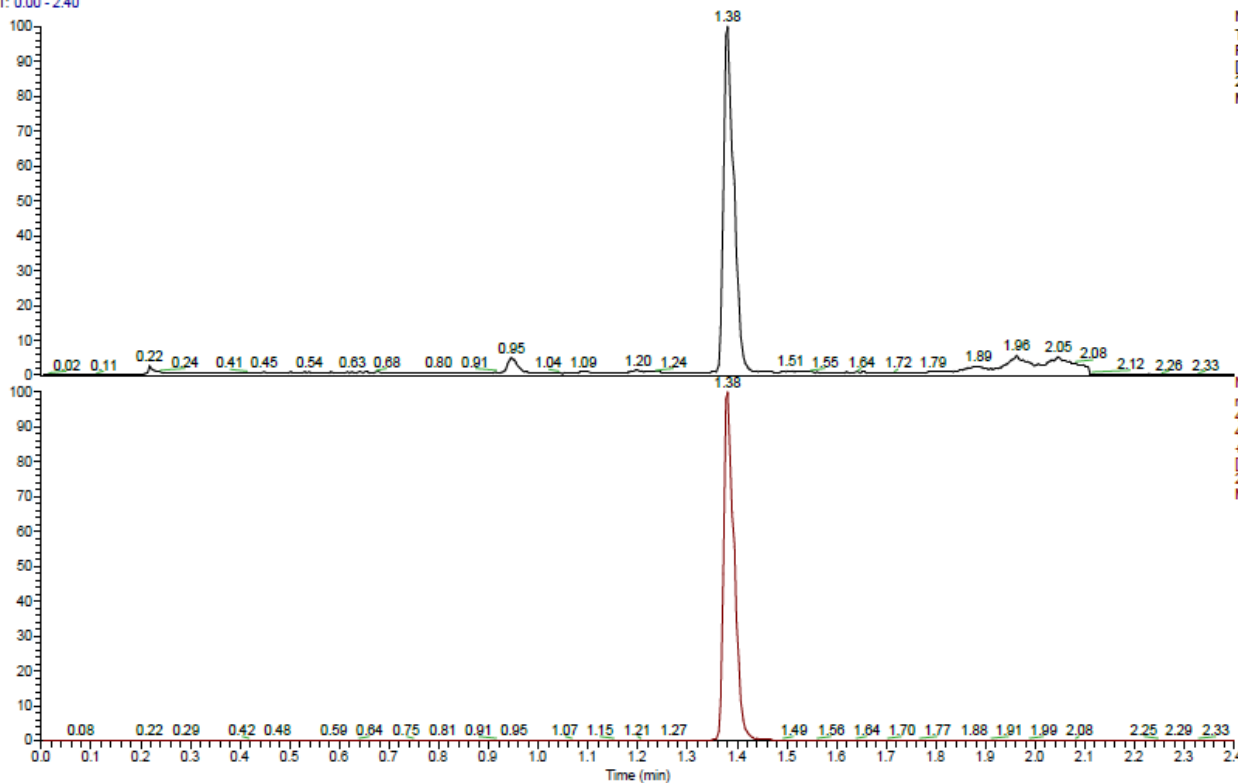

NL: 5.65E9  
TIC F: FTMS + p ESI  
Full ms  
[150.0000-  
2000.0000] MS  
Mix-35\_12

NL: 3.05E9  
m/z=  
460.67542-  
461.67542 F: FTMS  
+ p ESI Full ms  
[150.0000-  
2000.0000] MS  
Mix-35\_12

Mix-35 12 #301-311 RT: 1.36-1.41 AV: 11 NL: 1.38E9  
T: FTMS + p ESI Full ms [150.0000-2000.0000]

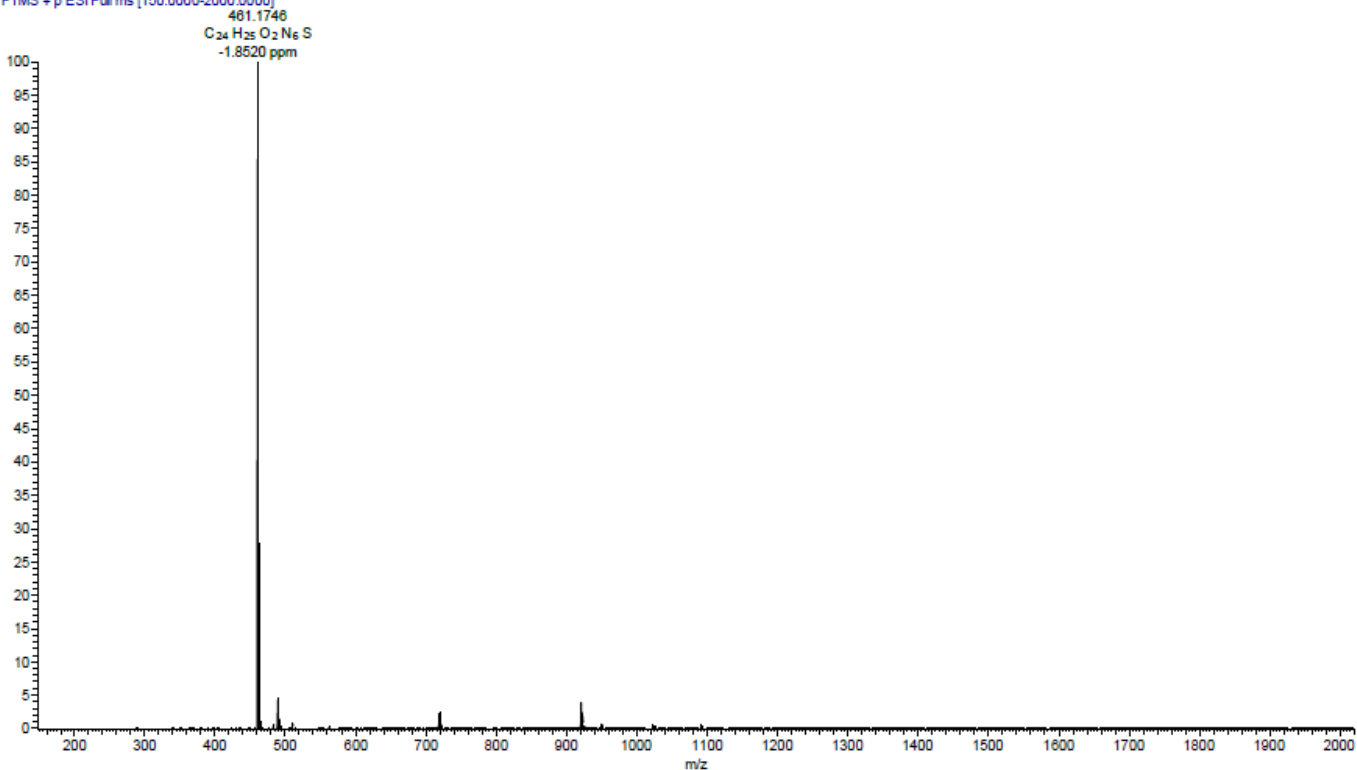

# Compound 14

title **sjae 213-2**  
 Method AN\_BASE.M  
 Date acquired 07-Dec-17, 19:01:03  
 FileName Analysis\LCMS5\_1207\_108.D  
 Acq. method AN\_BASE valve: 2  
 Column Waters XSelect CSH C18 (50x2.1mm, 3.5µ)  
 Flow 0.8 ml/min; Column temp: 25°C  
 Eluent A 95% acetonitrile + 5% 10 mM ammoniumbicarbonate in water  
 Eluent B 10mM ammoniumbicarbonate in water  
 Lin. Gradient t=0 min 5% A, t=3.5 min 98% A, t=6 min 98% A  
 Posttime 2 min  
 Detection DAD (210, 220 and 220-320 nm)  
 Detection PDA (210-320 nm)  
 Detection MSD (ESI pos/neg) mass range: 100-800

DAD A, Sig=270,100 Ref=off Chromatogram

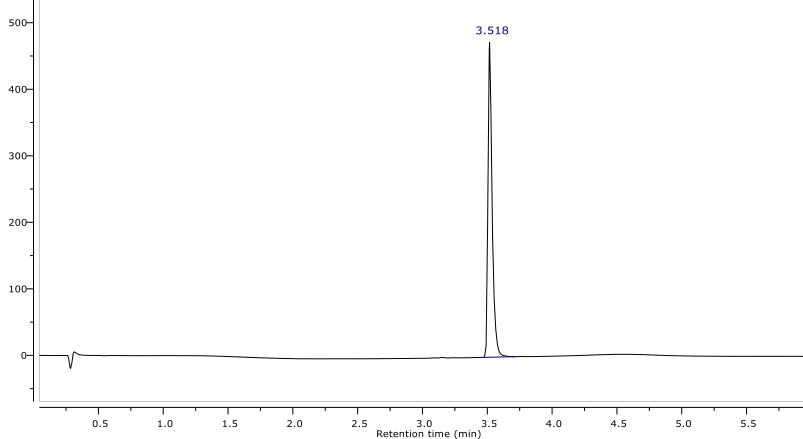

Integrals spectrum Chromatogram DAD A, Sig=270,100 Ref=off  
 rt (min) height area area (%)  
 3.52 473.5 17.72 100.00

MS + spectrum 3.49..3.63

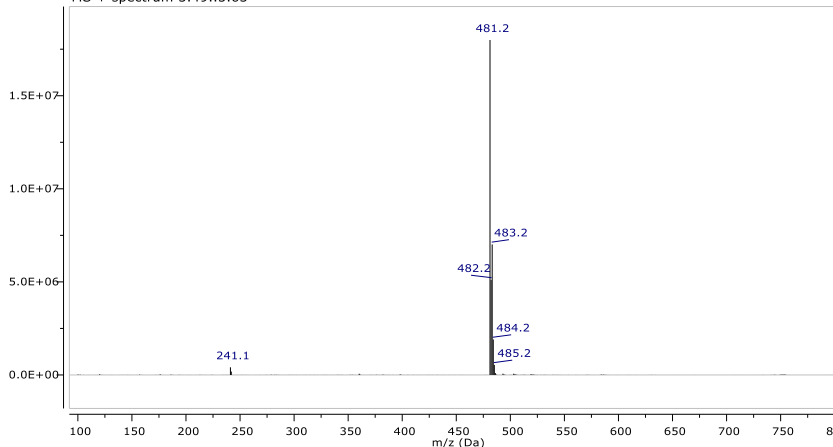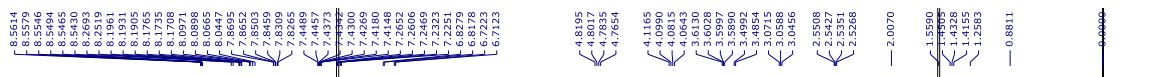

Title **sjae 54 213-2**  
 Data File Name 1208\_1050  
 Origin Bruker BioSpin GmbH  
 Method  
 Pulse Sequence zg30  
 Relaxation Delay 1 s  
 Solvent CDCl3  
 Acquisition Date 2017-12-10T09:36:42  
 Temperature ~ 298 K  
 Number of Scans 64  
 Frequency 400.232471584084 MHz  
 Nucleus 1H

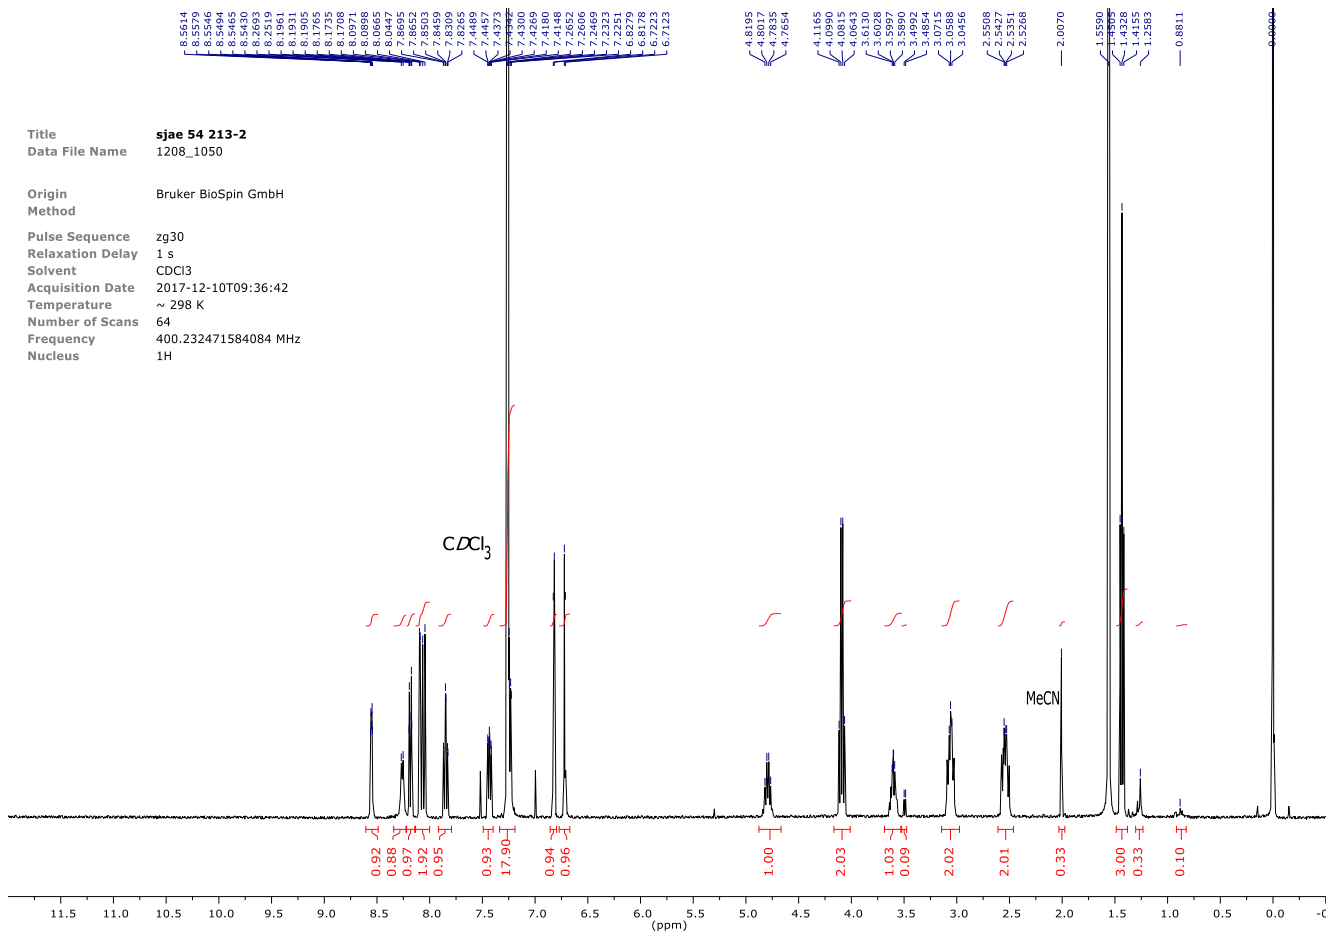

HRMS (m/z): C<sub>23</sub>H<sub>21</sub>N<sub>6</sub>O<sub>2</sub>ClS, [M+H]<sup>+</sup> Calc: 481.12080; found: 481.1201, Δppm -1.41

RT: 0.00 - 2.40

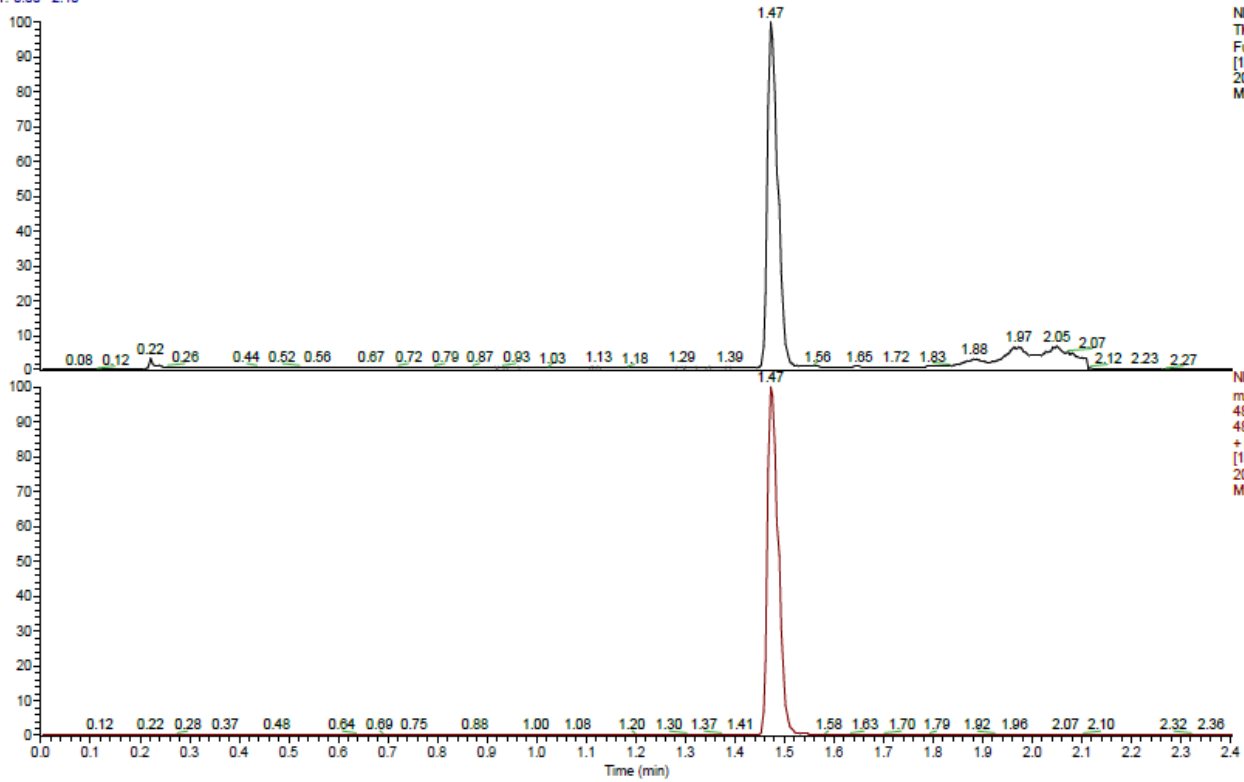

Mix-37\_14 #319-329 RT: 1.46-1.50 AV: 11 NL: 7.23E8  
T: FTMS + p ESI Full ms [150.0000-2000.0000]

481.1201  
C<sub>23</sub>H<sub>22</sub>O<sub>2</sub>N<sub>6</sub>ClS  
-1.4113 ppm

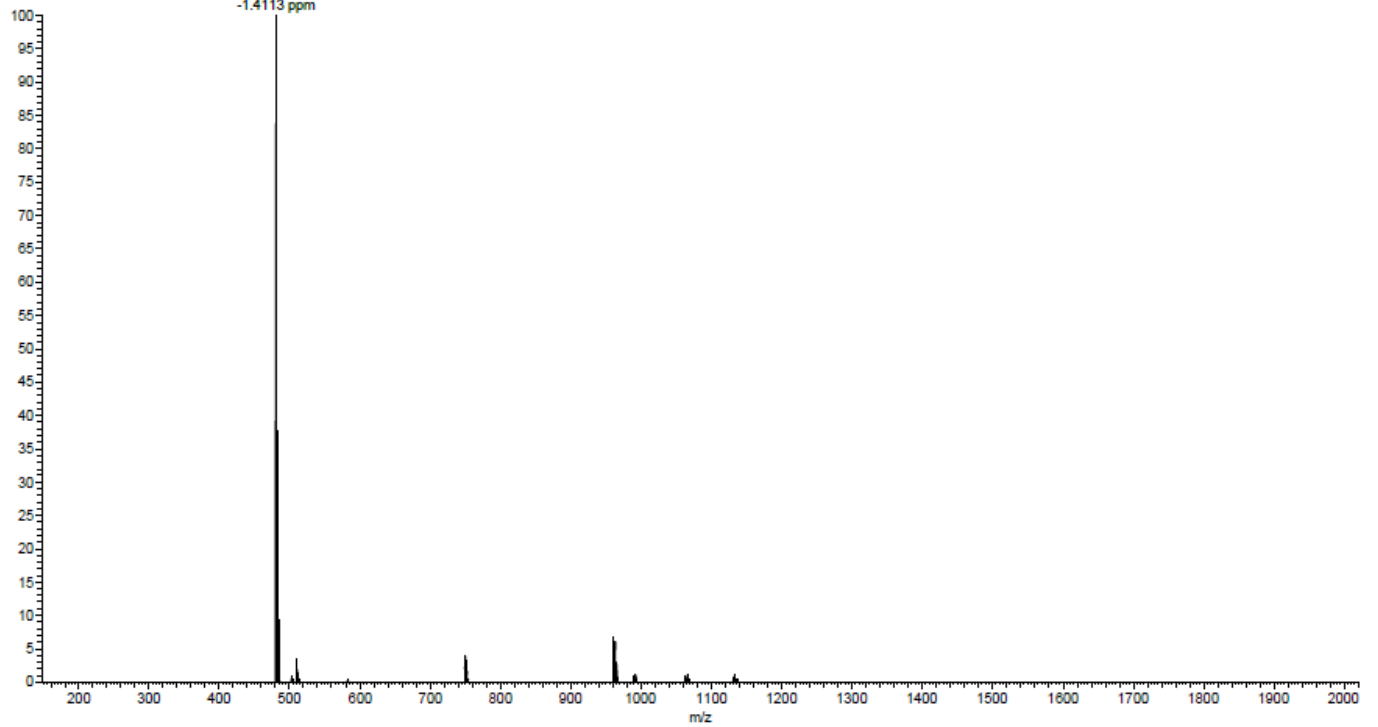

# Compound 16a

**title** PINI22-34-1  
**Method** AN\_ACID.M  
**Date acquired** 30-Apr-18, 07:56:13  
**FileName** Analysis/LCMS6\_0430\_007.D  
**Column** XSelect CSH C18 (50x2.1mm, 3.5µ) valve:3  
**Flow** 0.8 ml/min; Column temp: 35°C  
**Eluent A** 0.1% formic acid in acetonitrile  
**Eluent B** 0.1% formic acid in water  
**Gradient** t=0 min 5% A, t=3.5 min 98% A, t=6 min 98%A  
**Posttime** 2 min  
**Detection** DAD(210, 220 and 220-320nm)  
**Detection** PDA(210-320nm)  
**Detection** MSD (ESI pos/neg) mass range: 100 - 1000  
**Detection** ELSD gas temp: 40°C, flow 1.5 ml/min, gain 1

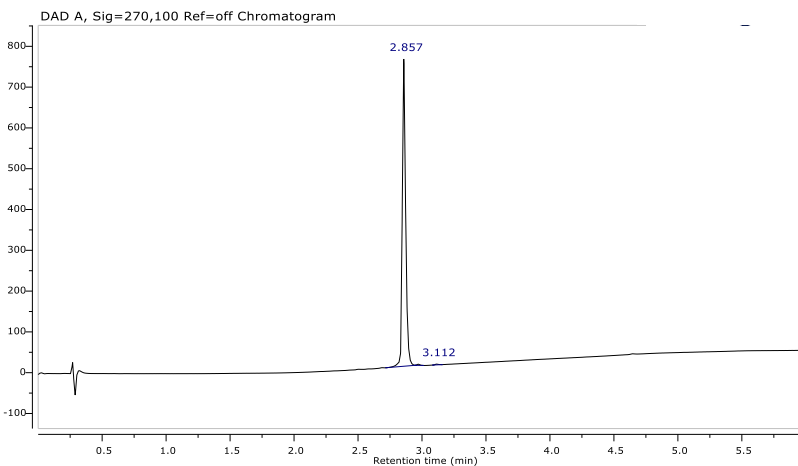

Integrals spectrum Chromatogram DAD A, Sig=270,100 Ref=off

| rt (min) | height | area    | area (%) |
|----------|--------|---------|----------|
| 2.86     | 753.2  | 23.02   | 99.45    |
| 2.97     | 2.857  | 0.07367 | 0.32     |
| 3.11     | 1.839  | 0.05285 | 0.23     |

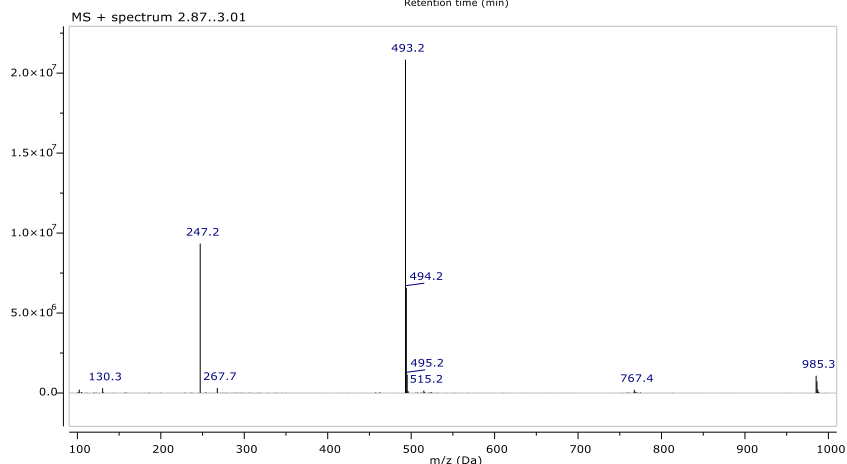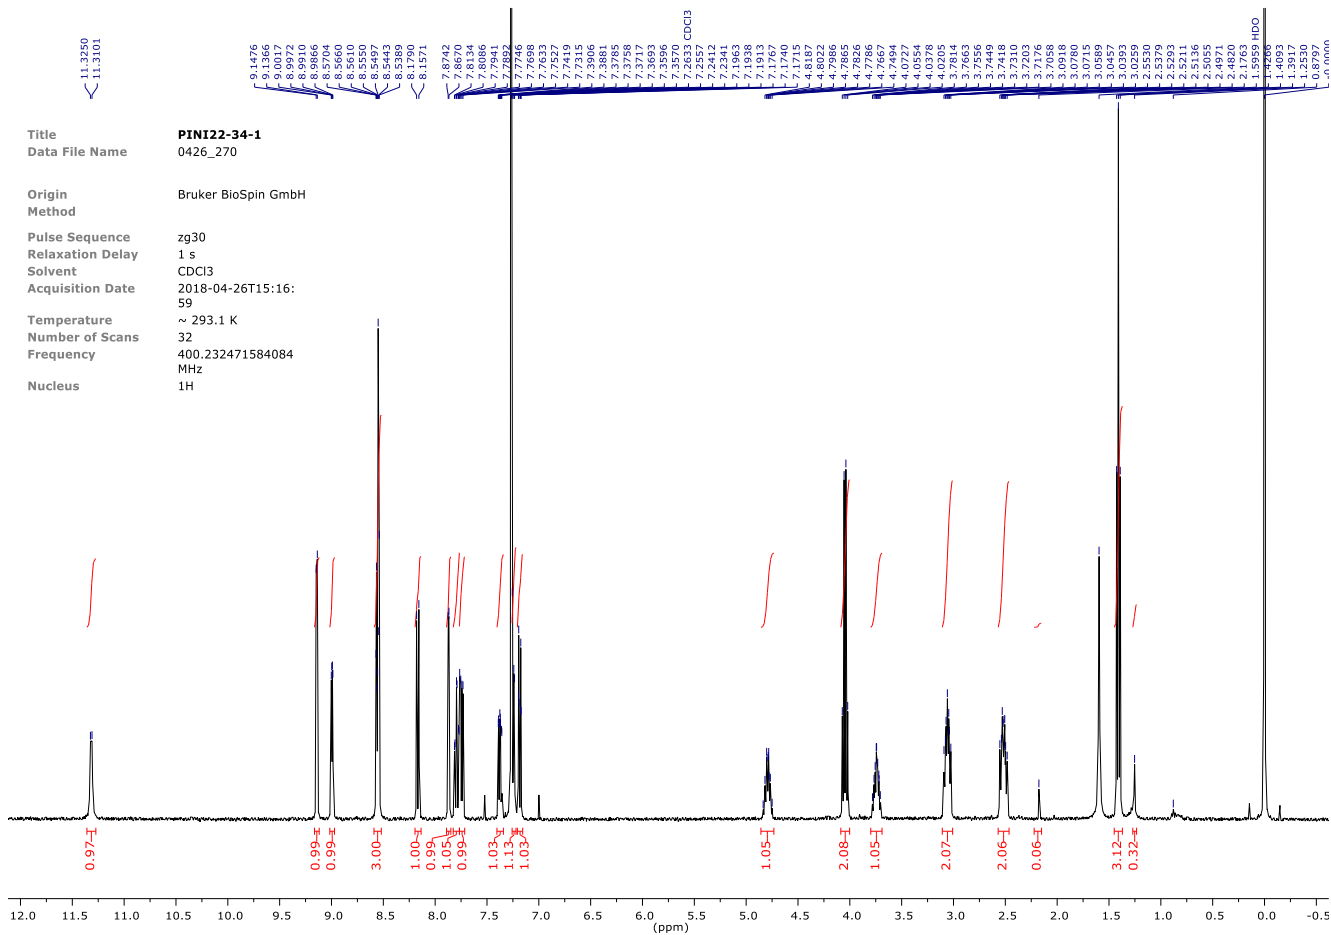

HRMS (m/z): C<sub>27</sub>H<sub>24</sub>N<sub>8</sub>O<sub>2</sub>, [M+H]<sup>+</sup> Calc: 493.20950; found: 493.2085, Δppm -1.99

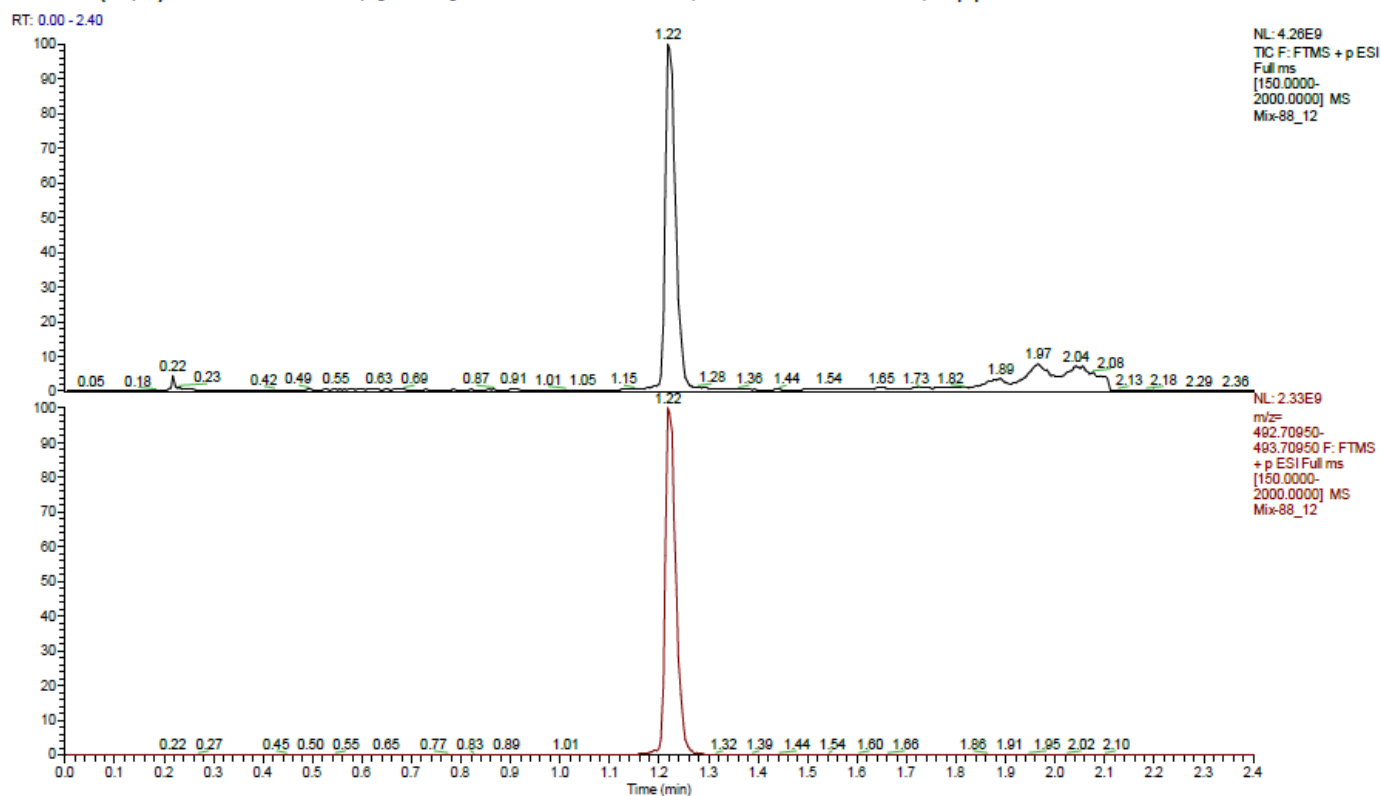

Mix-88\_12#263-275 RT: 1.20-1.25 AV: 13 NL: 9.37E8  
T: FTMS + p ESI Full ms [150.0000-2000.0000]

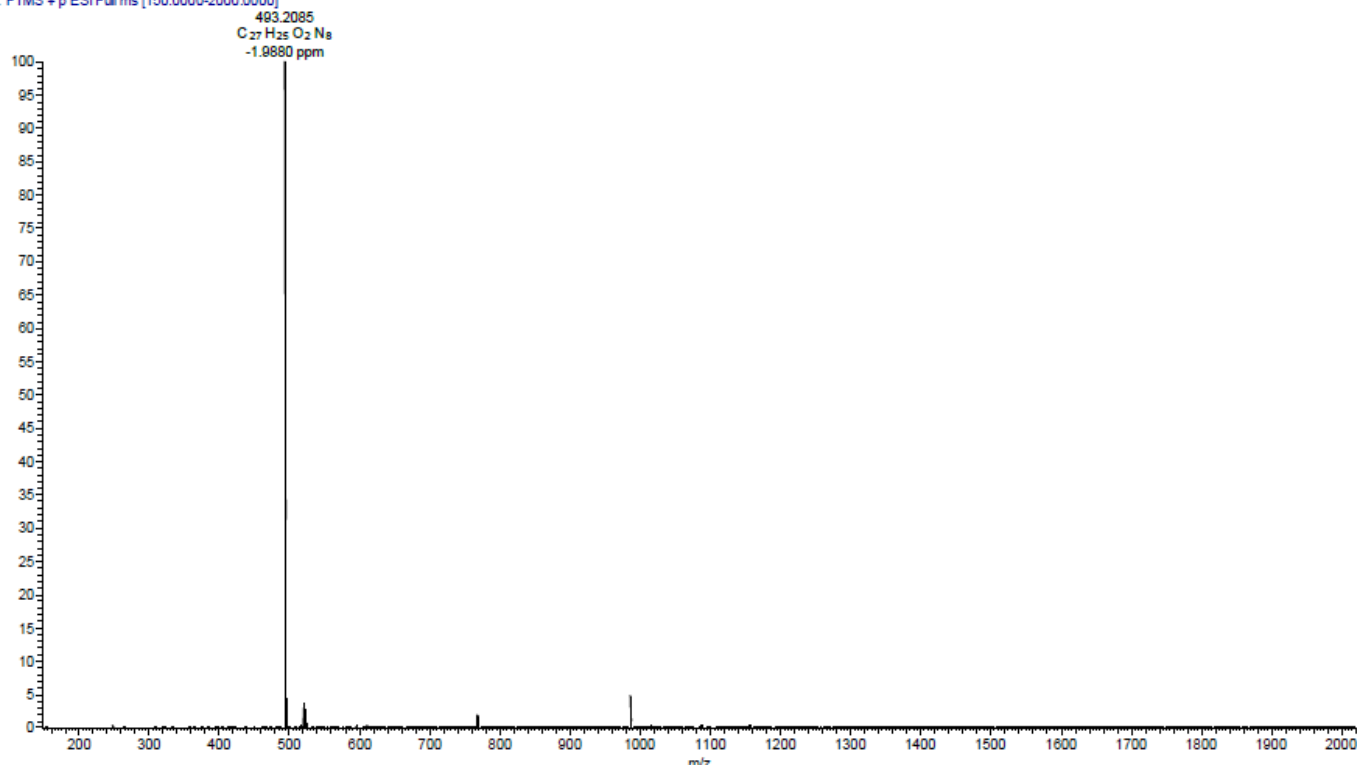

# Compound 16b

**title** PINI23-45-1  
**Method** AN\_ACID.M  
**Date acquired** 04-Oct-18, 16:32:14  
**FileName** Analysis\LCMS6\_1004\_072.D  
**Column** XSelect CSH C18 (50x2.1mm, 3.5μ) valve:3  
**Flow** 0.8 ml/min; Column temp: 35°C  
**Eluent A** 0.1% formic acid in acetonitrile  
**Eluent B** 0.1% formic acid in water  
**Gradient** t=0 min 5% A, t=3.5 min 98% A, t=6 min 98%A  
**Posttime** 2 min  
**Detection** DAD(210, 220 and 220-320nm)  
**Detection** PDA(210-320nm)  
**Detection** MSD (ESI pos/neg) mass range: 100 - 1000  
**Detection** ELSD gas temp: 40°C, flow 1.5 ml/min, gain 1

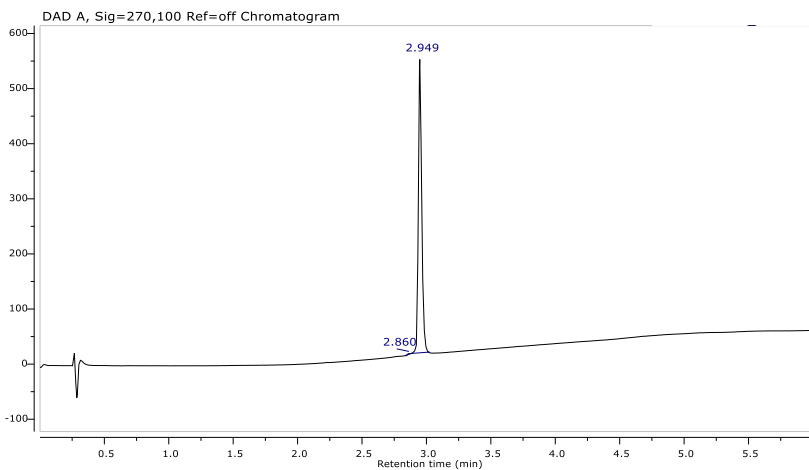

| rt (min) | height | area    | area (%) |
|----------|--------|---------|----------|
| 2.86     | 1.630  | 0.03502 | 0.22     |
| 2.95     | 532.4  | 16.05   | 99.78    |

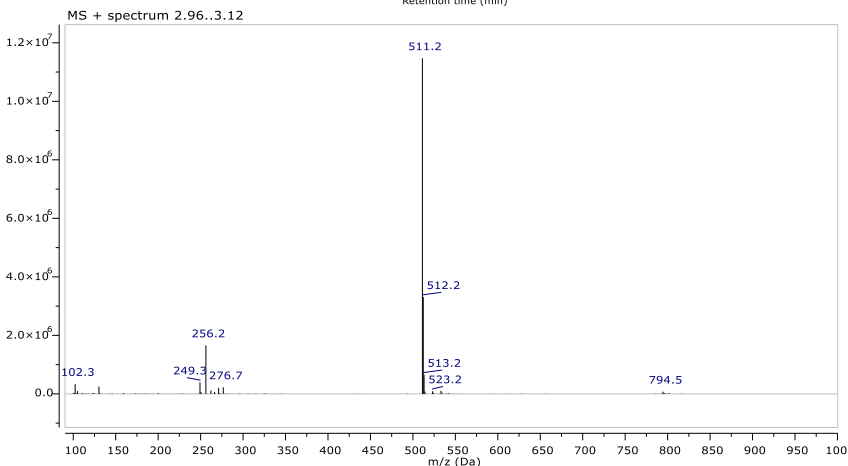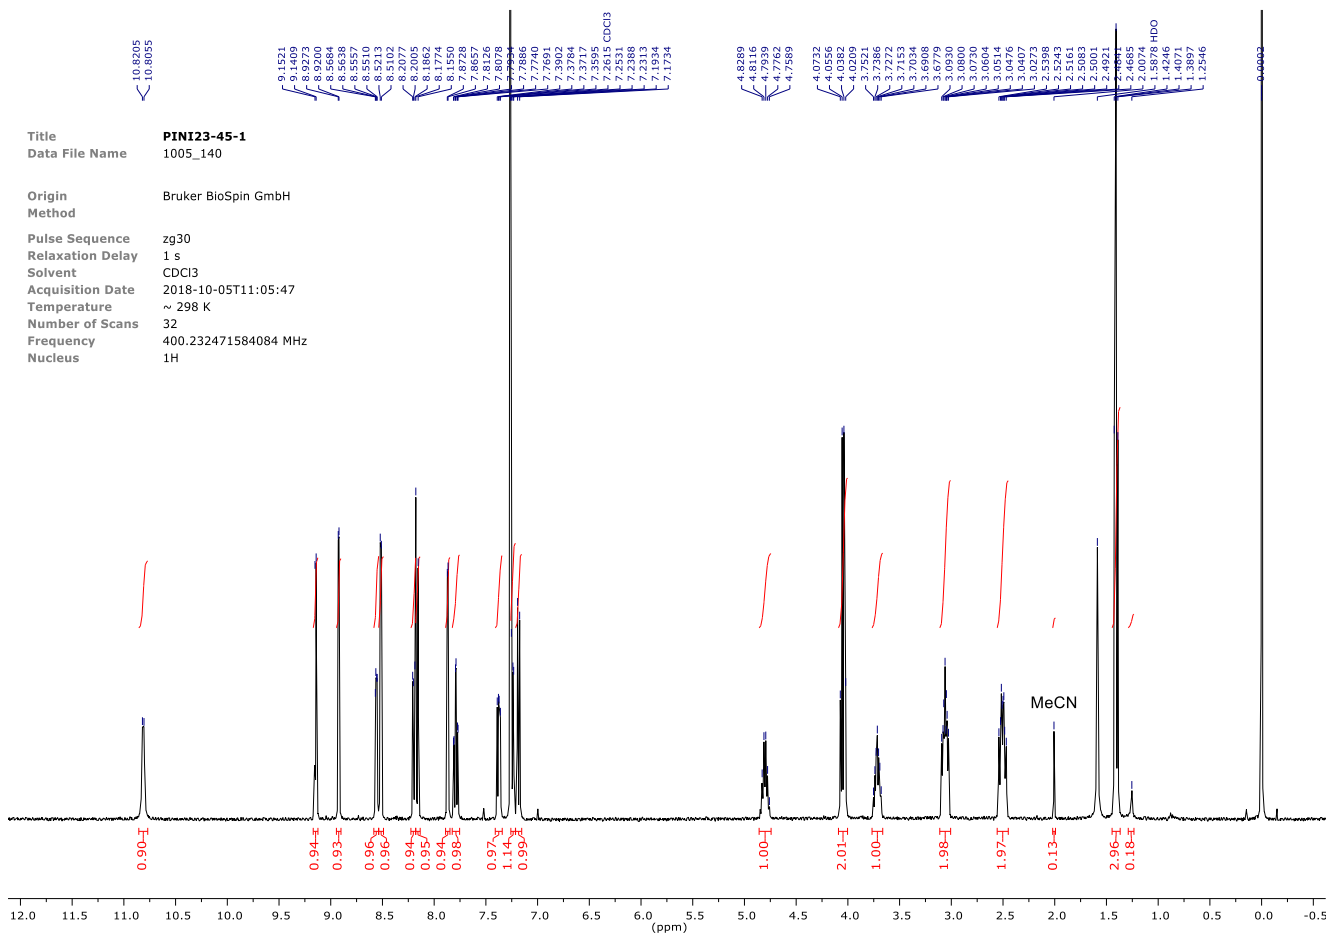



HRMS (m/z): C<sub>27</sub>H<sub>23</sub>N<sub>8</sub>O<sub>2</sub>F, [M+H]<sup>+</sup> Calc: 511.20008; found: 511.1991, Δppm -1.86

RT: 0.00 - 2.40

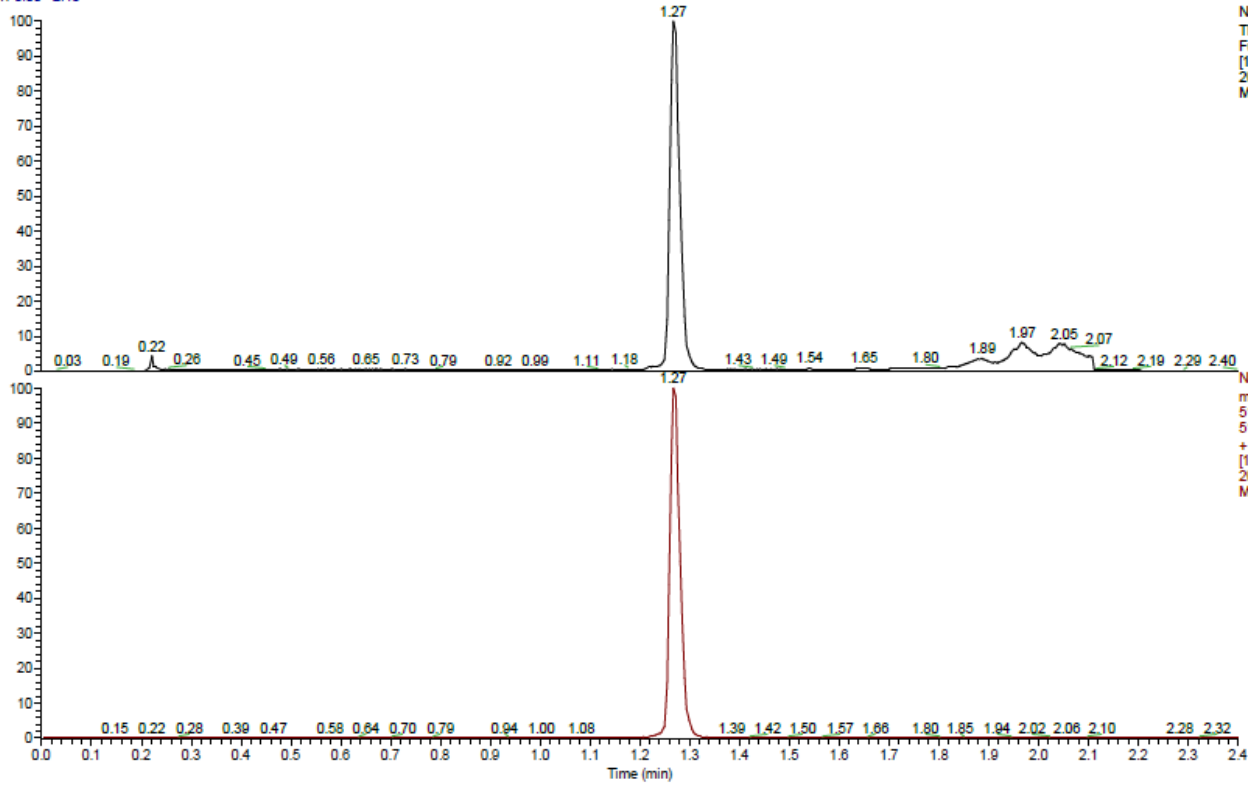

NL: 4.04E9  
TIC F: FTMS + p ESI  
Full ms  
[150.0000-  
2000.0000] MS  
Mix-88F\_18

NL: 2.16E9  
m/z=  
510.70008-  
511.70008 F: FTMS  
+ p ESI Full ms  
[150.0000-  
2000.0000] MS  
Mix-88F\_18

Mix-88F 18 #274-285 RT: 1.25-1.29 AV: 12 NL: 8.99E8  
T: FTMS + p ESI Full ms [150.0000-2000.0000]

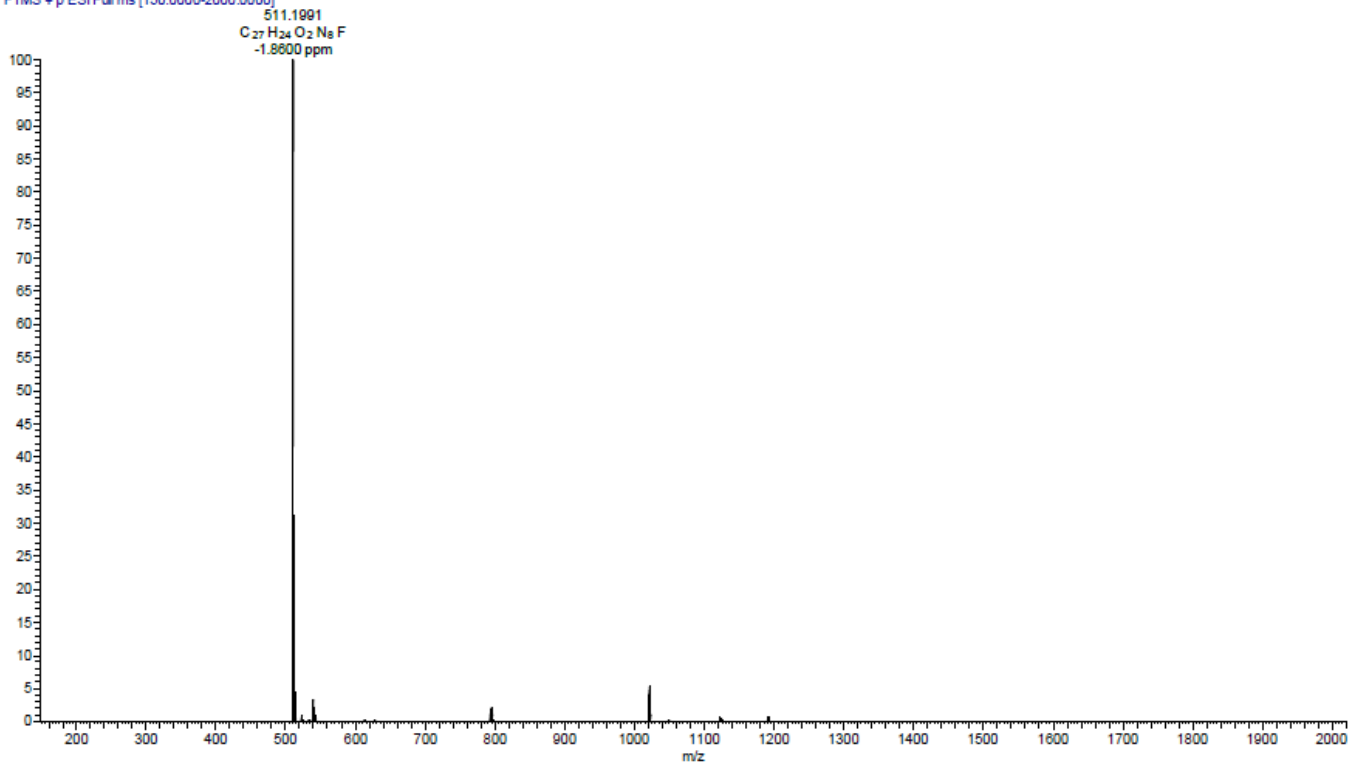

# Compound 17a

**title** PINI22-87-1  
**Method** AN\_ACID.M  
**Date acquired** 05-Jul-18, 21:33:18  
**FileName** Analysis/LCMS6\_0705\_091.D  
**Column** XSelect CSH C18 (50x2.1mm, 3.5µ)  
 valve:3  
**Flow** 0.8 ml/min; Column temp: 35°C  
**Eluent A** 0.1% formic acid in acetonitrile  
**Eluent B** 0.1% formic acid in water  
**Gradient** t=0 min 5% A, t=3.5 min 98% A, t=6 min 98%A  
**Posttime** 2 min  
**Detection** DAD(210, 220 and 220-320nm)  
**Detection** PDA(210-320nm)  
**Detection** MSD (ESI pos/neg) mass range: 100 - 1000  
**Detection** ELSD gas temp: 40°C, flow 1.5 ml/min, gain 1

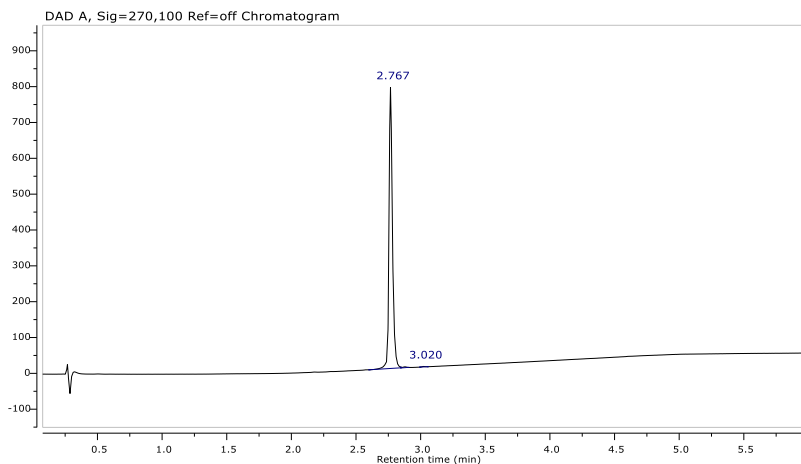

Integrals spectrum Chromatogram DAD A, Sig=270,100 Ref=off

| rt (min) | height | area    | area (%) |
|----------|--------|---------|----------|
| 2.77     | 784.6  | 23.95   | 99.53    |
| 2.88     | 2.294  | 0.07873 | 0.33     |
| 3.02     | 1.337  | 0.03456 | 0.14     |

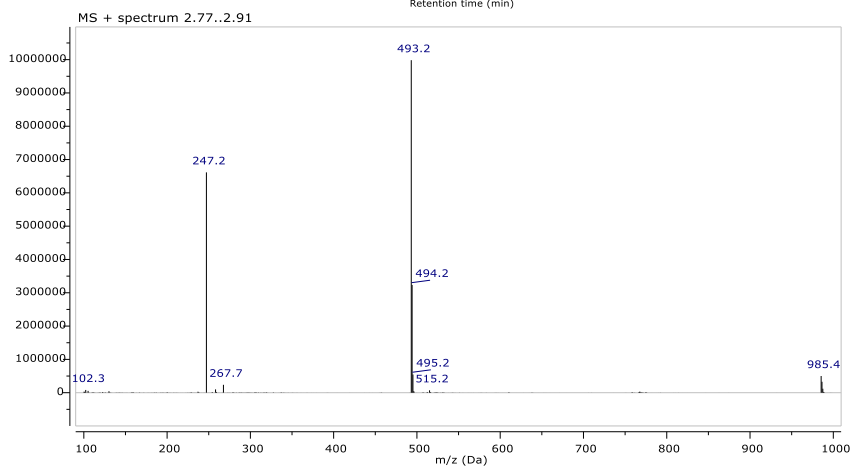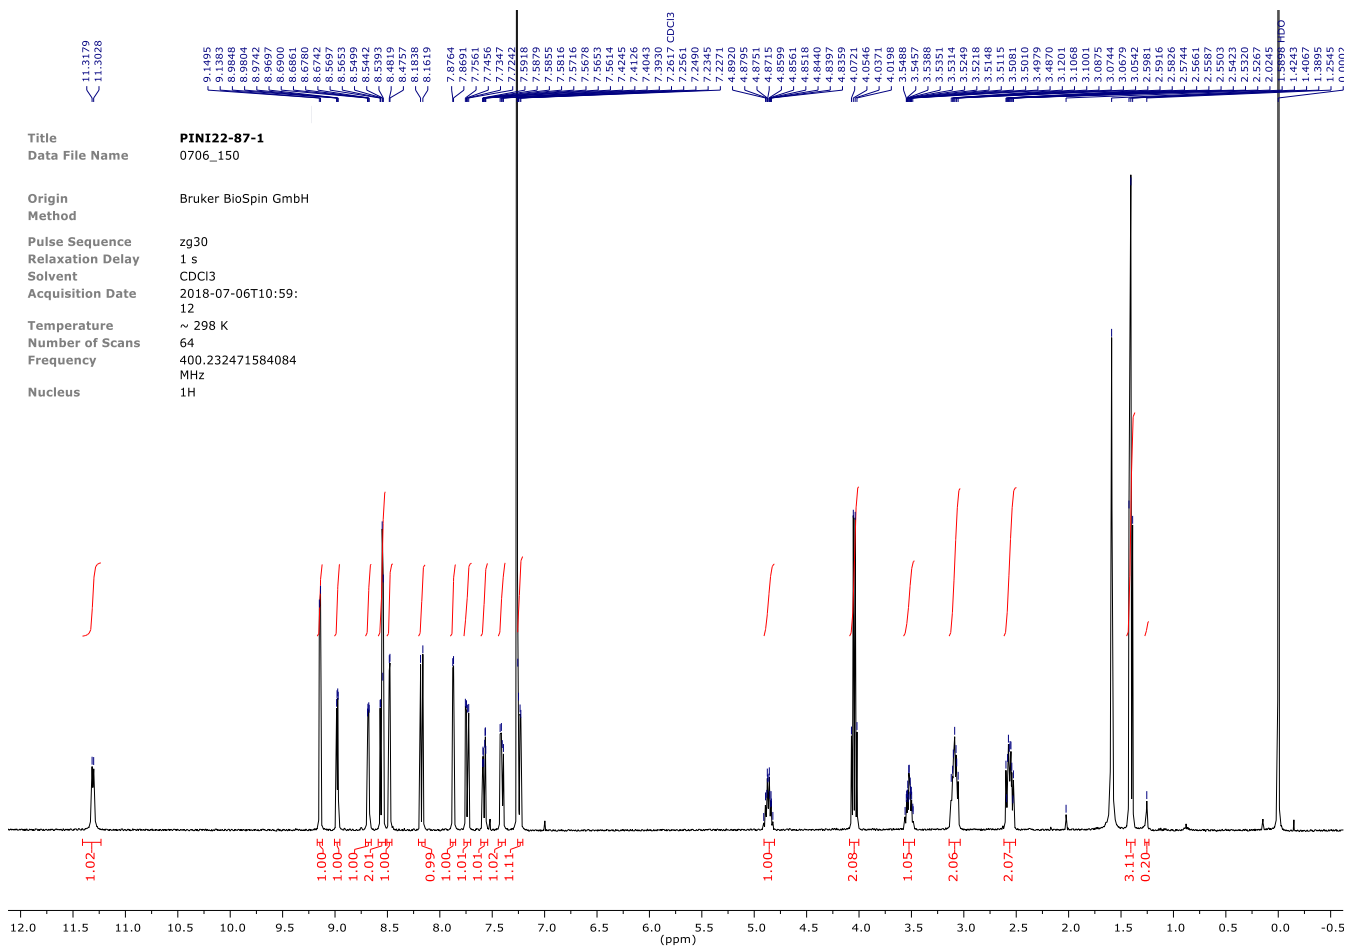

HRMS (m/z): C<sub>27</sub>H<sub>24</sub>N<sub>8</sub>O<sub>2</sub>, [M+H]<sup>+</sup> Calc: 493.20950; found: 493.2084, Δppm -2.32

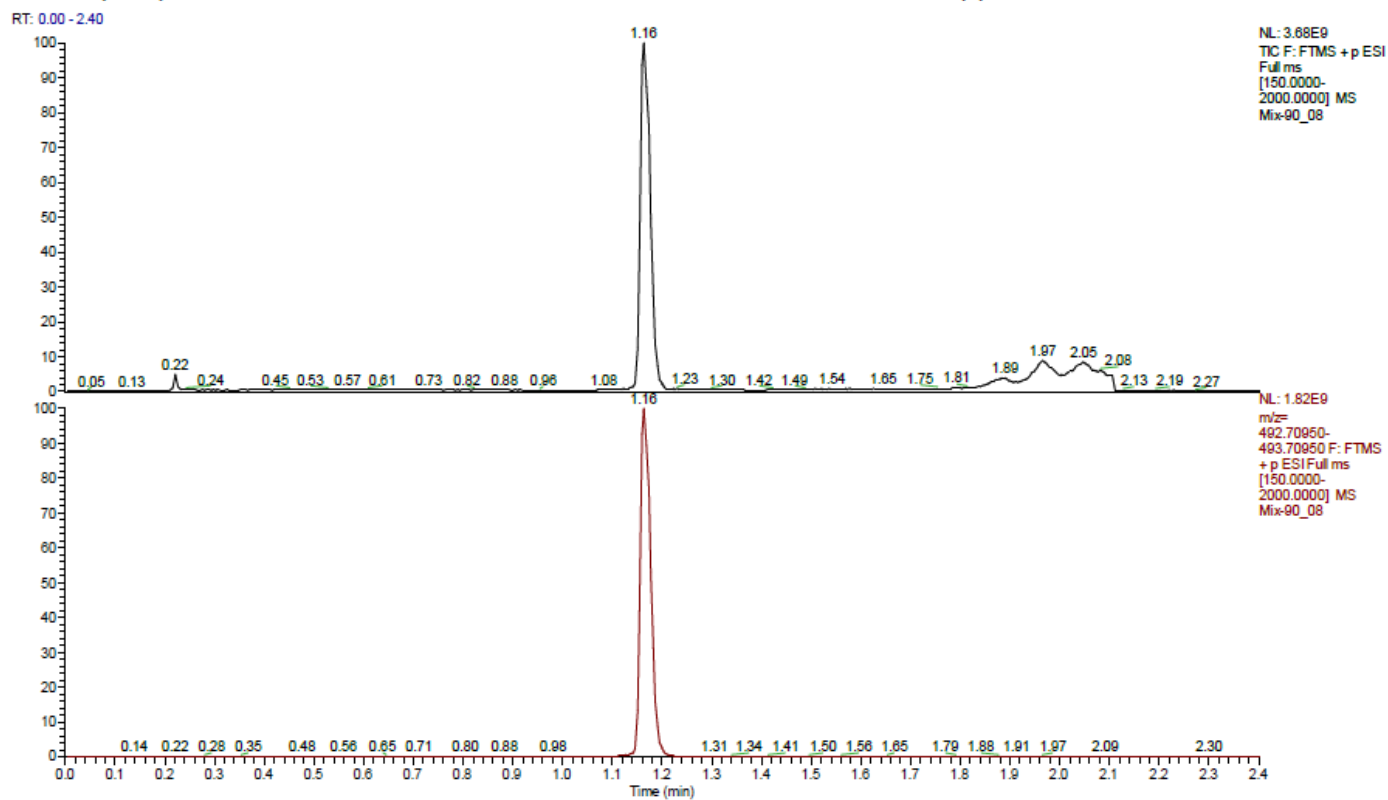

Mix-90\_08 #262-262 RT: 1.15-1.20 AV: 11 NL: 8.21E8  
T: FTMS + p ESI Full ms [150.0000-2000.0000]

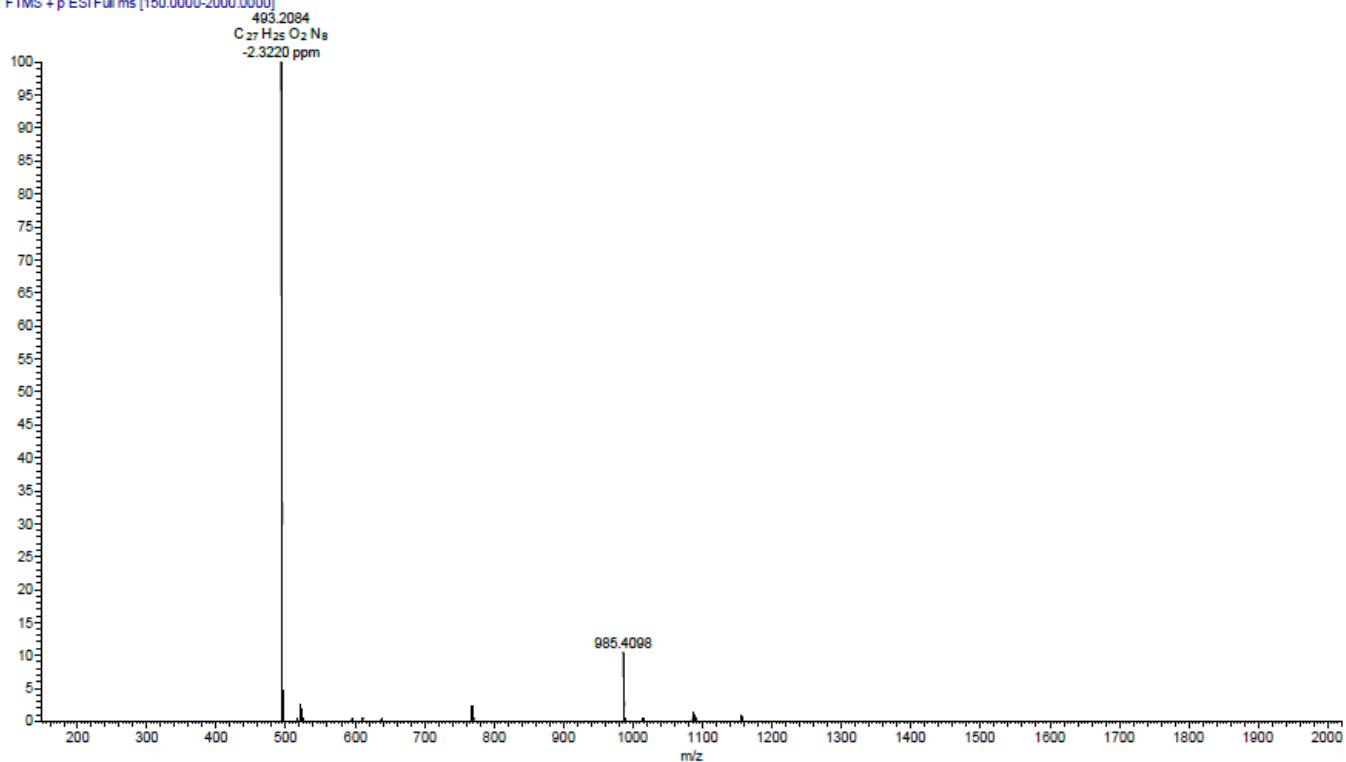

# Compound 17b

**title** PINI23-46-1  
**Method** AN\_ACID.M  
**Date acquired** 05-Oct-18, 18:11:59  
**FileName** Analysis\LCMS6\_1005\_093.D  
**Column** XSelect CSH C18 (50x2.1mm, 3.5µ) valve:3  
**Flow** 0.8 ml/min; Column temp: 35°C  
**Eluent A** 0.1% formic acid in acetonitrile  
**Eluent B** 0.1% formic acid in water  
**Gradient** t=0 min 5% A, t=3.5 min 98% A, t=6 min 98%A  
**Posttime** 2 min  
**Detection** DAD(210, 220 and 220-320nm)  
**Detection** PDA(210-320nm)  
**Detection** MSD (ESI pos/neg) mass range: 100 - 1000  
**Detection** ELSD gas temp: 40°C, flow 1.5 ml/min, gain 1

Integrals spectrum Chromatogram DAD A, Sig=270,100 Ref=off

| rt (min) | height | area    | area (%) |
|----------|--------|---------|----------|
| 2.65     | 1.922  | 0.04536 | 0.19     |
| 2.77     | 6.284  | 0.1979  | 0.82     |
| 2.85     | 764.9  | 23.68   | 97.68    |
| 2.95     | 8.574  | 0.3195  | 1.32     |

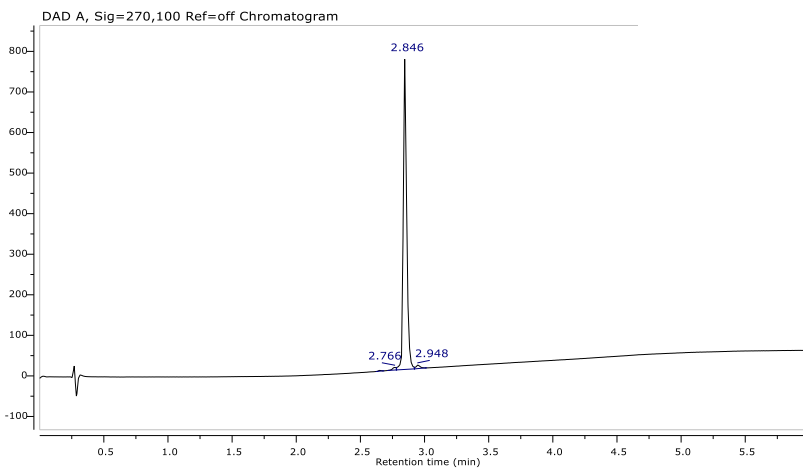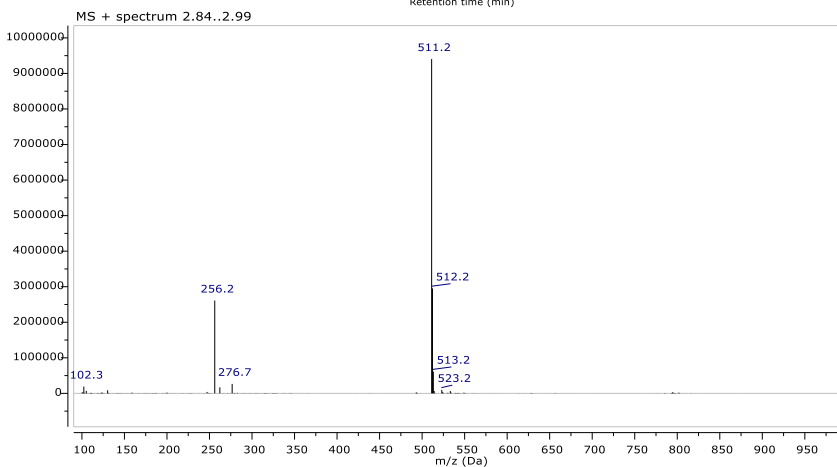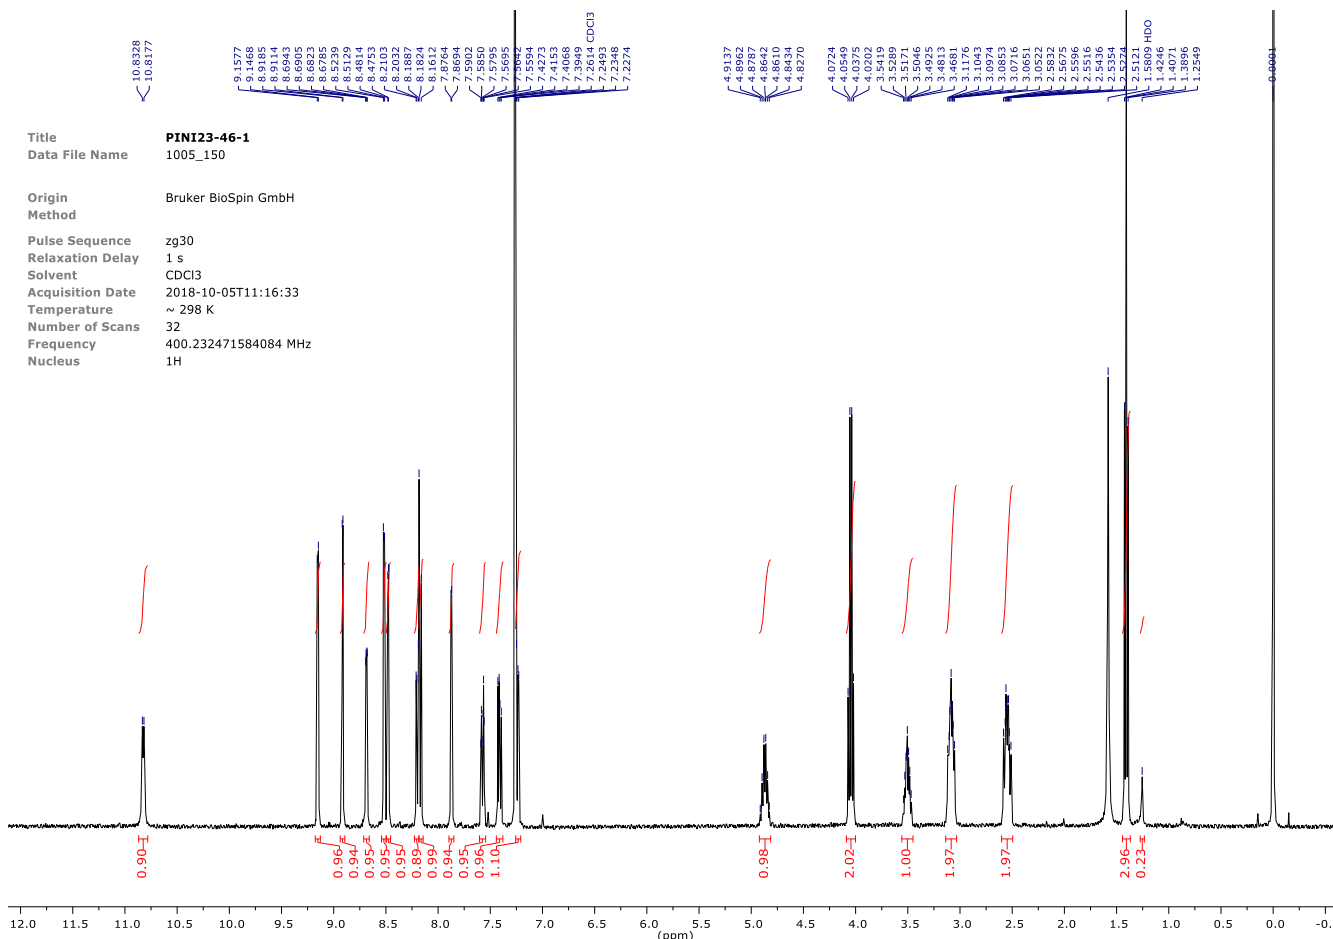

**Title** PINI23-46-1  
**Data File Name** 1005\_150  
**Origin** Bruker BioSpin GmbH  
**Method**  
**Pulse Sequence** zg30  
**Relaxation Delay** 1 s  
**Solvent** CDCl3  
**Acquisition Date** 2018-10-05T11:16:33  
**Temperature** ~ 298 K  
**Number of Scans** 32  
**Frequency** 400.232471584084 MHz  
**Nucleus** 1H

HRMS (m/z): C<sub>27</sub>H<sub>23</sub>N<sub>8</sub>O<sub>2</sub>F, [M+H]<sup>+</sup> Calc 511.20008; found: 511.1991, Δppm -1.95

RT: 0.00 - 2.40

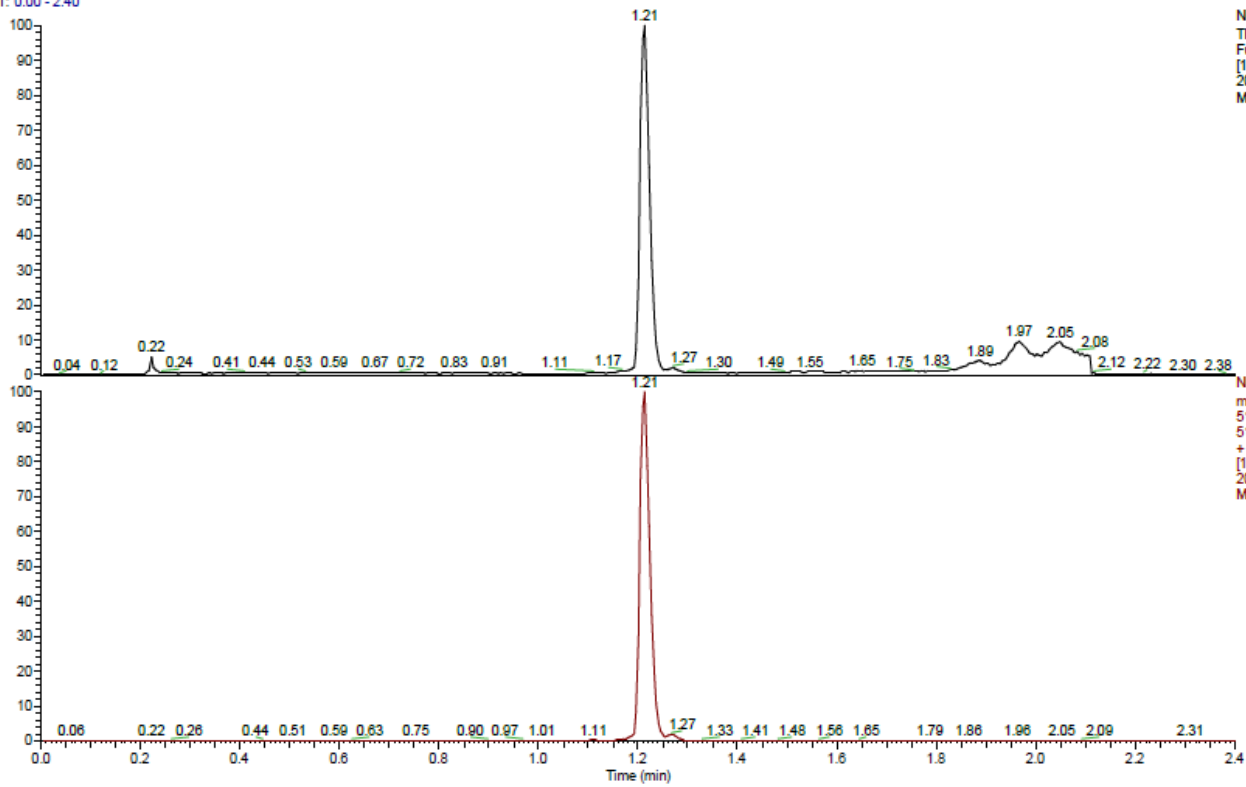

NL: 3.47E9  
TC F: FTMS + p ESI  
Full ms  
[150.0000-  
2000.0000] MS  
Mix-90F\_16

NL: 1.69E9  
m/z=  
510.70008-  
511.70008 F: FTMS  
+ p ESI Full ms  
[150.0000-  
2000.0000] MS  
Mix-90F\_16

Mix-90F\_16 #259-270 RT: 1.19-1.24 AV: 12 NL: 6.91E8  
T: FTMS + p ESI Full ms [150.0000-2000.0000]

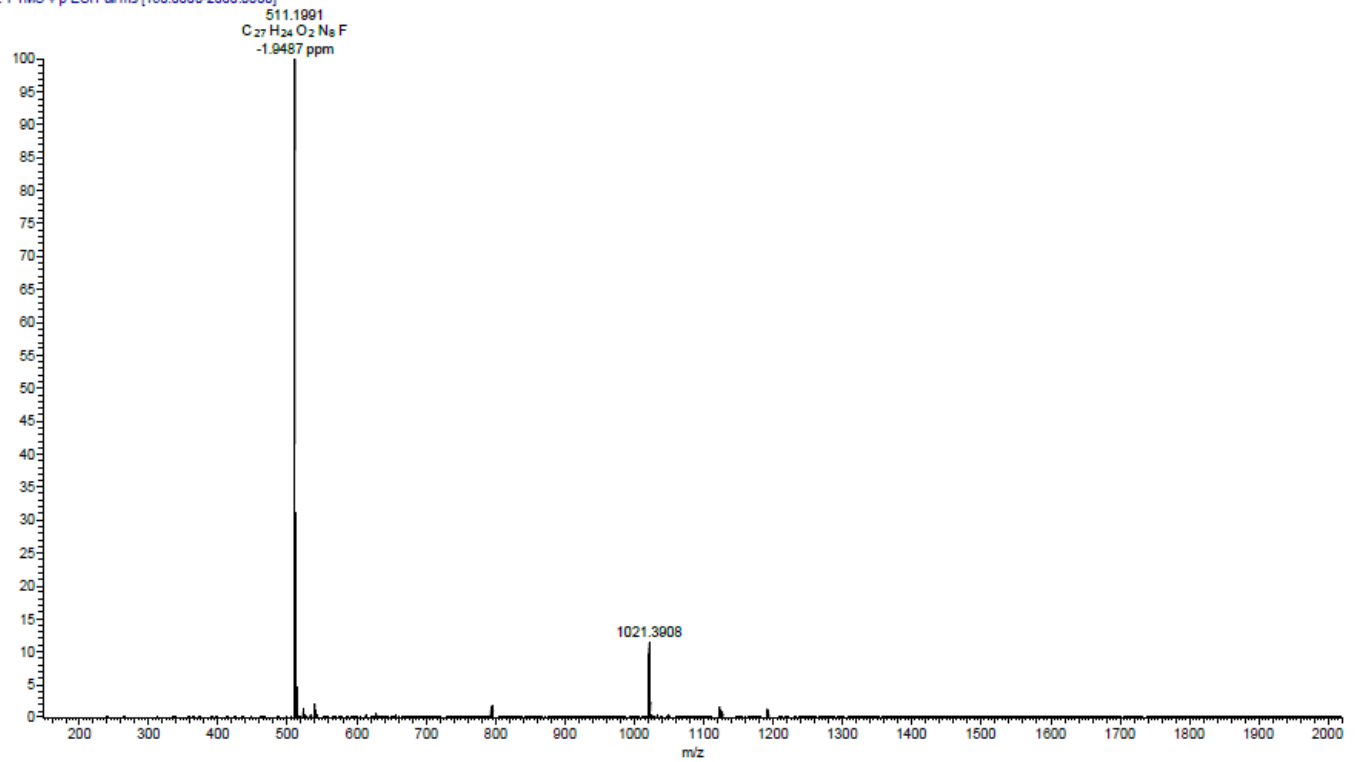

# Compound 18a

**title** PINI22-80-1  
**Method** AN\_ACID.M  
**Date acquired** 29-Jun-18, 18:00:30  
**FileName** Analysis\LCMS6\_0629\_074.D  
**Column** XSelect CSH C18 (50x2.1mm, 3.5µ)  
 valve:3  
**Flow** 0.8 ml/min; Column temp: 35°C  
**Eluent A** 0.1% formic acid in acetonitrile  
**Eluent B** 0.1% formic acid in water  
**Gradient** t=0 min 5% A, t=3.5 min 98% A, t=6 min 98% A  
**Posttime** 2 min  
**Detection** DAD(210, 220 and 220-320nm)  
**Detection** PDA(210-320nm)  
**Detection** MSD (ESI pos/neg) mass range: 100 - 1000  
**Detection** ELSD gas temp: 40°C, flow 1.5 ml/min, gain 1

DAD A, Sig=270,100 Ref=off Chromatogram

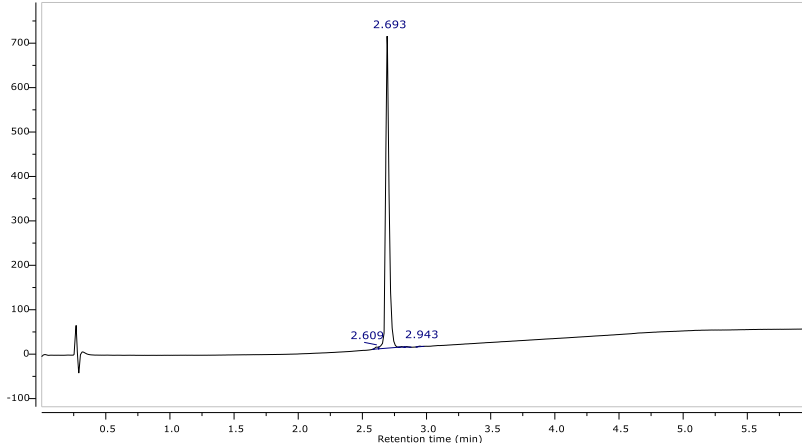

Integrals spectrum Chromatogram DAD A, Sig=270,100 Ref=off

| rt (min) | height | area    | area (%) |
|----------|--------|---------|----------|
| 2.61     | 4.230  | 0.1266  | 0.58     |
| 2.69     | 702.3  | 21.52   | 99.02    |
| 2.80     | 1.392  | 0.02884 | 0.13     |
| 2.85     | 1.272  | 0.02770 | 0.13     |
| 2.94     | 1.254  | 0.03079 | 0.14     |

MS + spectrum 2.72..2.80 - 2.59 - 2.97

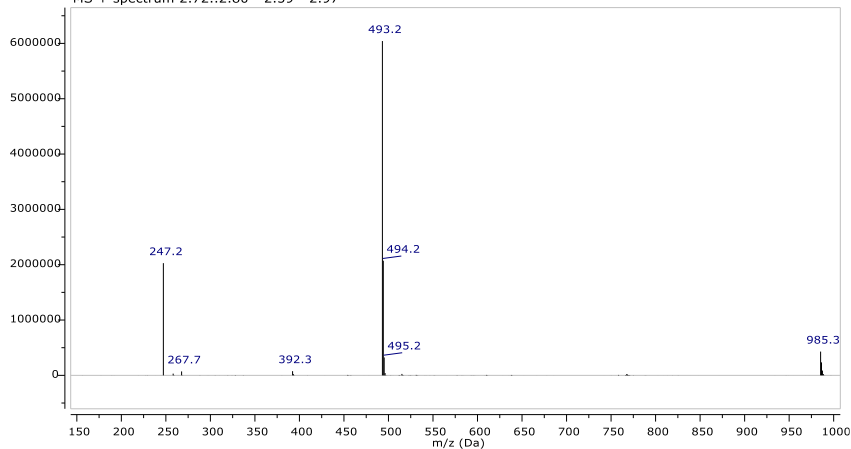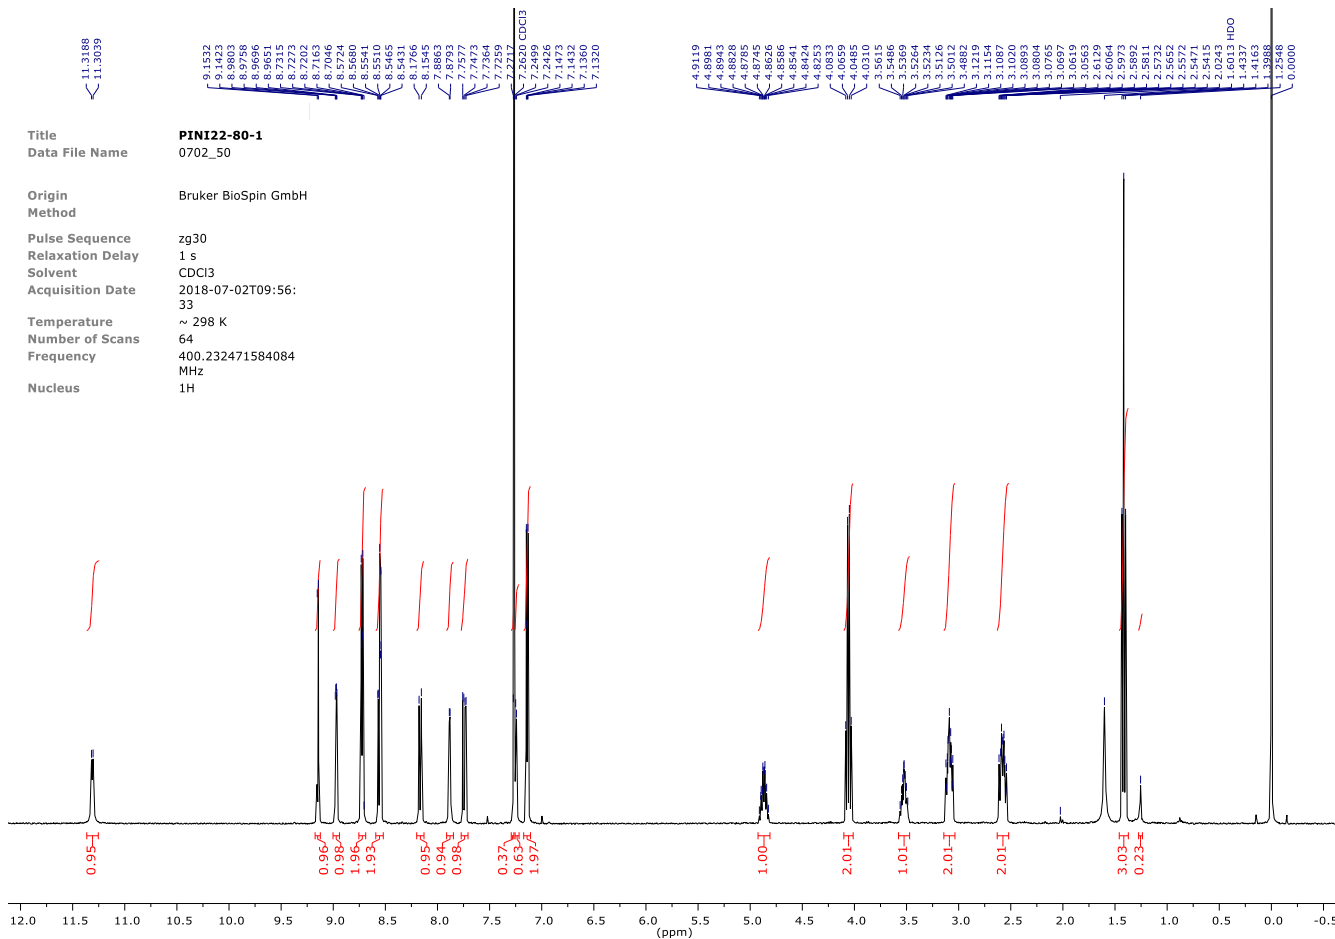

HRMS (m/z): C<sub>27</sub>H<sub>24</sub>N<sub>8</sub>O<sub>2</sub>, [M+H]<sup>+</sup> Calc: 493.20950; found: 493.2084, Δppm -2.16

RT: 0.00 - 2.40

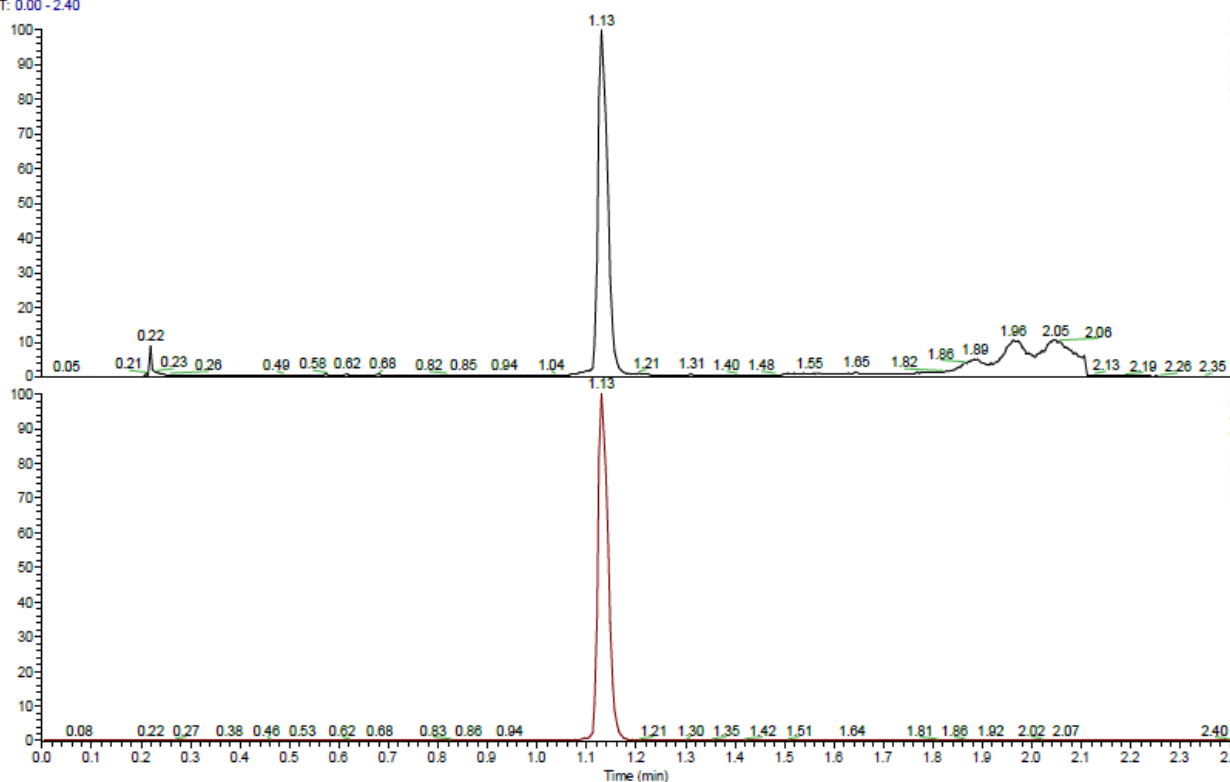

NL: 2.88E9  
TIC F: FTMS + p ESI  
Full ms  
[150.0000-  
2000.0000] MS  
Mix-91\_06

NL: 1.44E9  
m/z=  
492.70950-  
493.70950 F: FTMS  
+ p ESI Full ms  
[150.0000-  
2000.0000] MS  
Mix-91\_06

Mix-91\_06 #243-254 RT: 1.11-1.16 AV: 12 NL: 5.92E8  
T: FTMS + p ESI Full ms [150.0000-2000.0000]

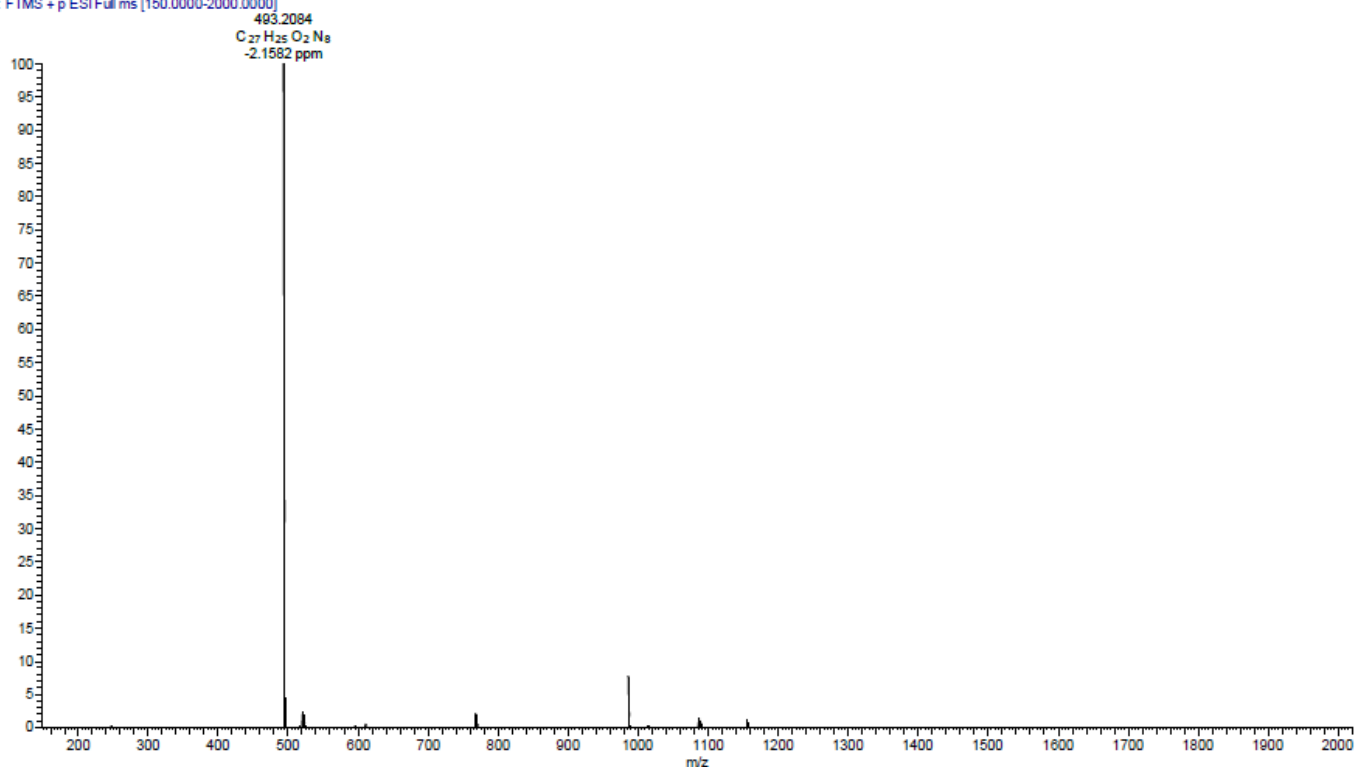

# Compound 18b

**title** PINI23-47-1  
**Method** AN\_ACID.M  
**Date acquired** 04-Oct-18, 16:49:04  
**FileName** Analysis/LCMS6\_1004\_074.D  
**Column** XSelect CSH C18 (50x2.1mm, 3.5μ) valve:3  
**Flow** 0.8 ml/min; Column temp: 35°C  
**Eluent A** 0.1% formic acid in acetonitrile  
**Eluent B** 0.1% formic acid in water  
**Gradient** t=0 min 5% A, t=3.5 min 98% A, t=6 min 98%A  
**Posttime** 2 min  
**Detection** DAD(210, 220 and 220-320nm)  
**Detection** PDA(210-320nm)  
**Detection** MSD (ESI pos/neg) mass range: 100 - 1000  
**Detection** ELSD gas temp: 40°C, flow 1.5 ml/min, gain 1

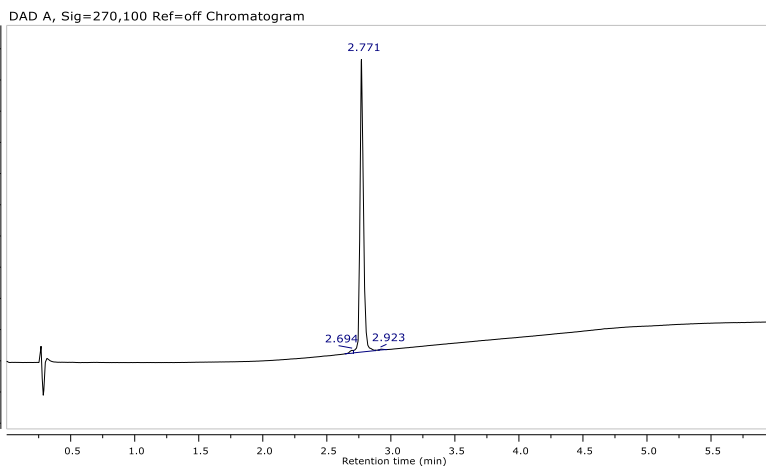

Integrals spectrum Chromatogram DAD A, Sig=270,100 Ref=off

| rt (min) | height | area    | area (%) |
|----------|--------|---------|----------|
| 2.69     | 4.626  | 0.1446  | 0.98     |
| 2.77     | 469.5  | 14.57   | 98.77    |
| 2.92     | 1.248  | 0.03730 | 0.25     |

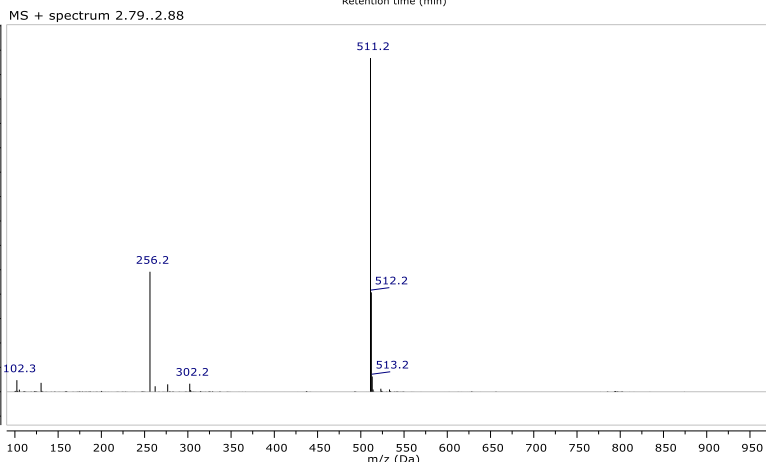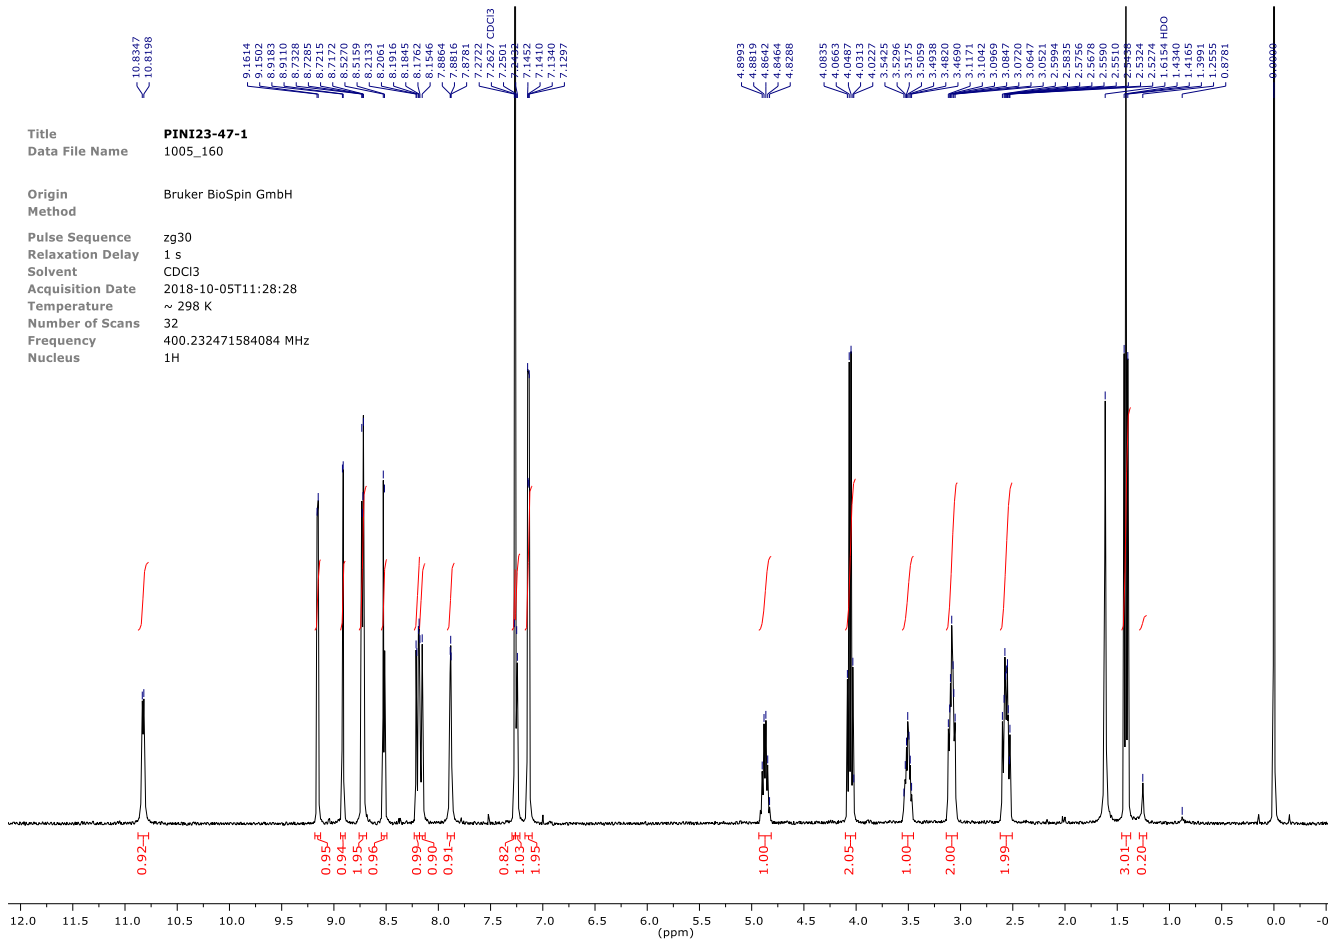



HRMS (m/z): C<sub>27</sub>H<sub>23</sub>N<sub>8</sub>O<sub>2</sub>F, [M+H]<sup>+</sup> Calc: 511.20008; found: 511.1992, Δppm -1.69

RT: 0.00 - 2.40

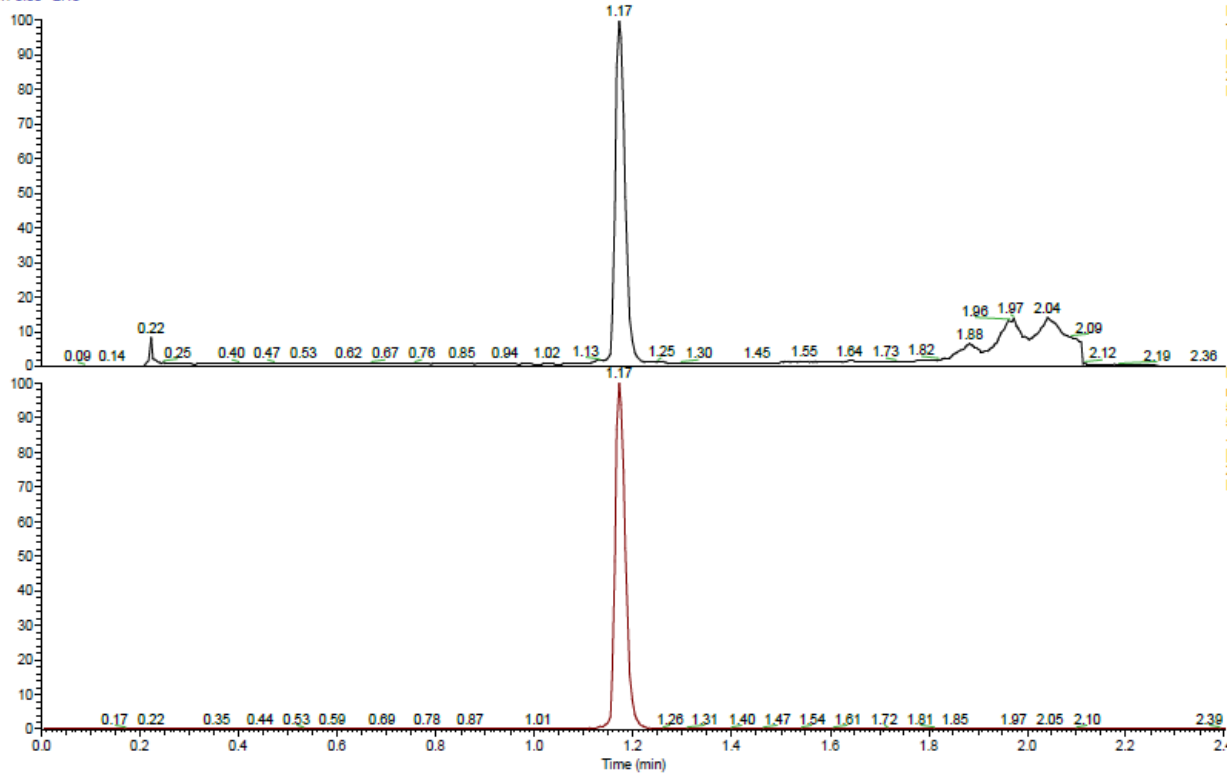

NL: 2.29E9  
TIC F: FTMS + p ESI  
Full ms  
[150.0000-  
2000.0000] MS  
Mix-91F\_10

NL: 1.10E9  
m/z=  
510.70008-  
511.70008 F: FTMS  
+ p ESI Full ms  
[150.0000-  
2000.0000] MS  
Mix-91F\_10

Mix-91F\_10 #251-264 RT: 1.14-1.20 AV: 14 NL: 4.33E8  
T: FTMS + p ESI Full ms [150.0000-2000.0000]

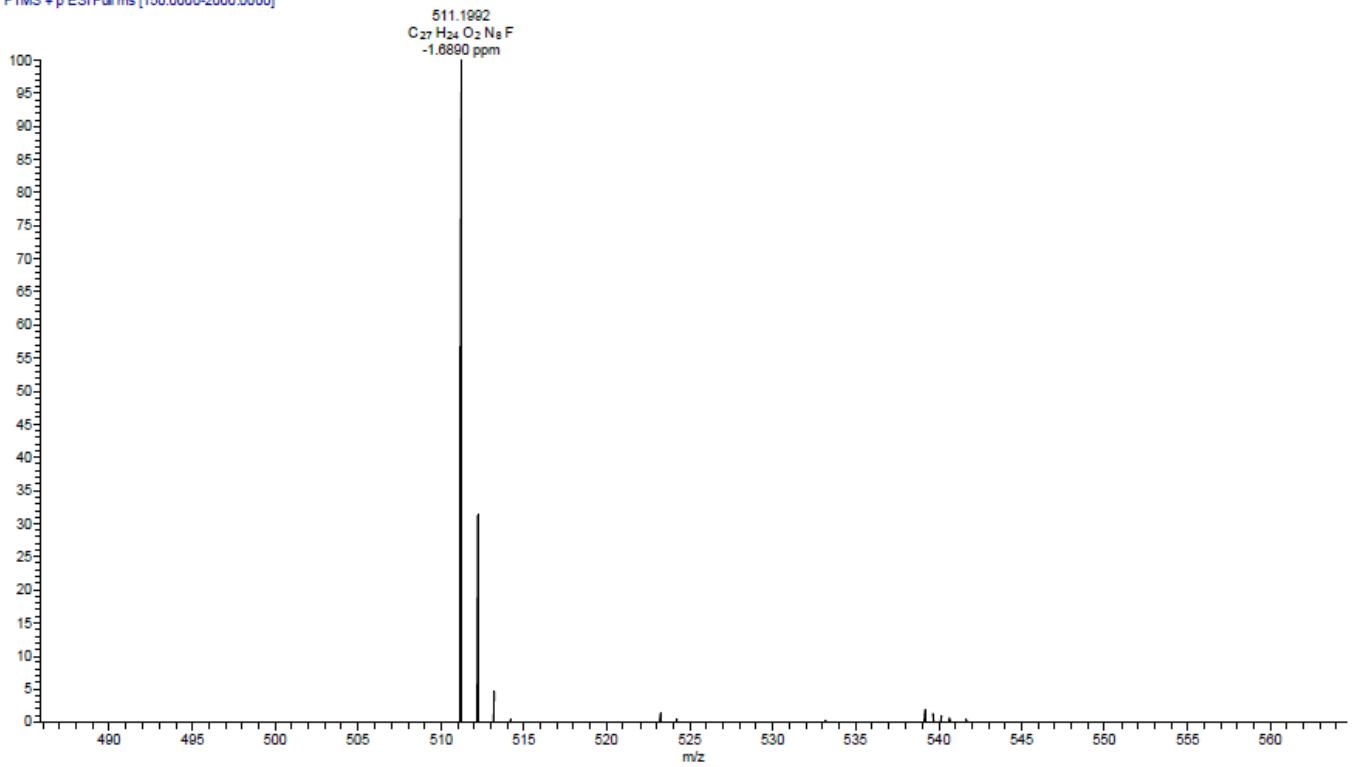

# Compound 19

**title** PINI22-33-1  
**Method** AN\_ACID.M  
**Date acquired** 30-Apr-18, 07:47:50  
**FileName** Analysis\LCMS6\_0430\_006.D  
**Column** XSelect CSH C18 (50x2.1mm, 3.5µ)  
**Flow** 0.8 ml/min; Column temp: 35°C  
**Eluent A** 0.1% formic acid in acetonitrile  
**Eluent B** 0.1% formic acid in water  
**Gradient** t=0 min 5% A, t=3.5 min 98% A, t=6 min 98% A  
**Posttime** 2 min  
**Detection** DAD(210, 220 and 220-320nm)  
**Detection** PDA(210-320nm)  
**Detection** MSD (ESI pos/neg) mass range: 100 - 1000  
**Detection** ELSD gas temp: 40°C, flow 1.5 ml/min, gain 1

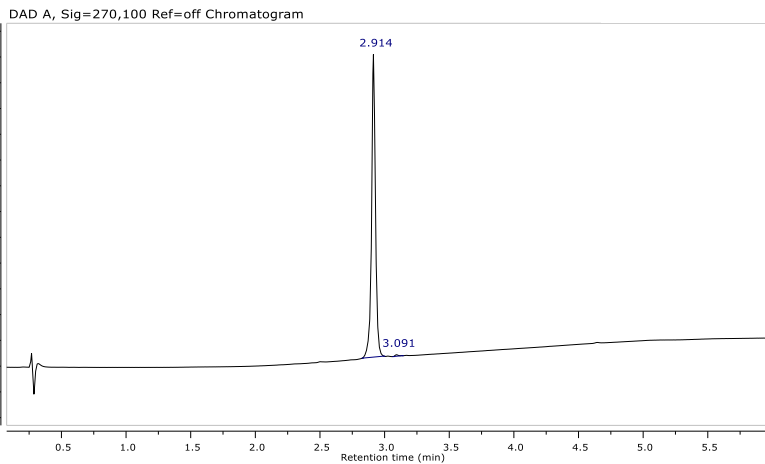

Integrals spectrum Chromatogram DAD A, Sig=270,100 Ref=off

| rt (min) | height | area    | area (%) |
|----------|--------|---------|----------|
| 2.91     | 587.4  | 20.37   | 99.60    |
| 3.09     | 2.927  | 0.08126 | 0.40     |

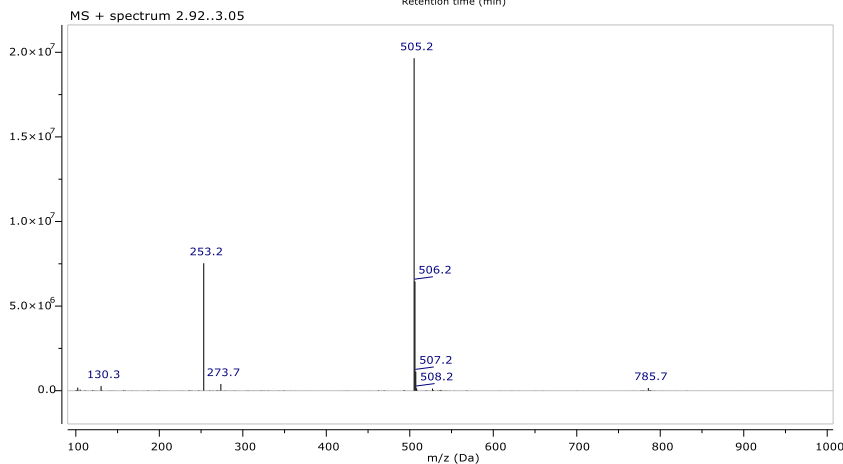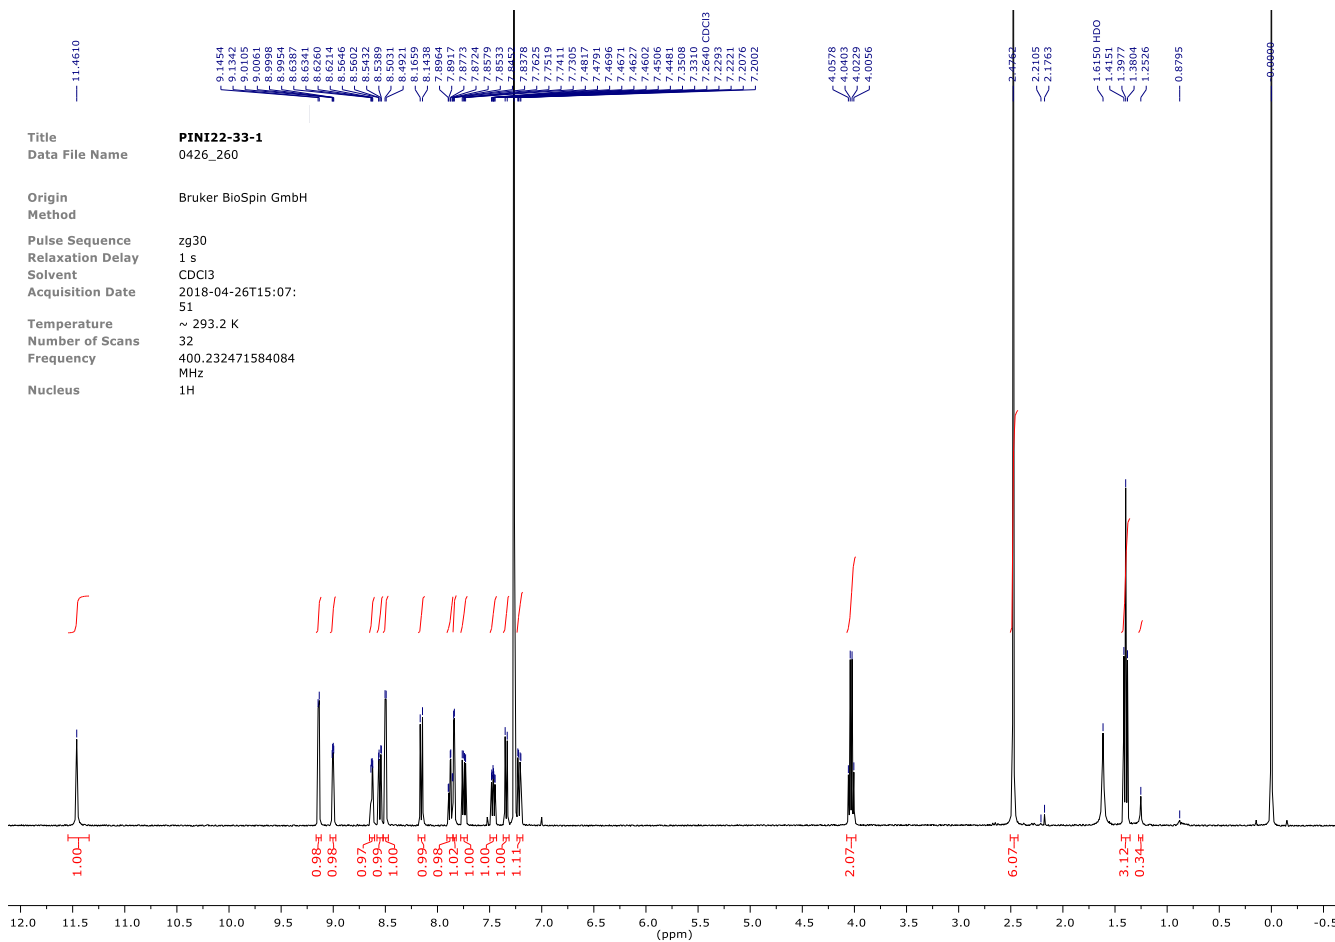

HRMS (m/z): C<sub>28</sub>H<sub>24</sub>N<sub>8</sub>O<sub>2</sub>, [M+H]<sup>+</sup> Calc: 505.20950; found: 505.2086, Δppm -1.87

RT: 0.00 - 2.40

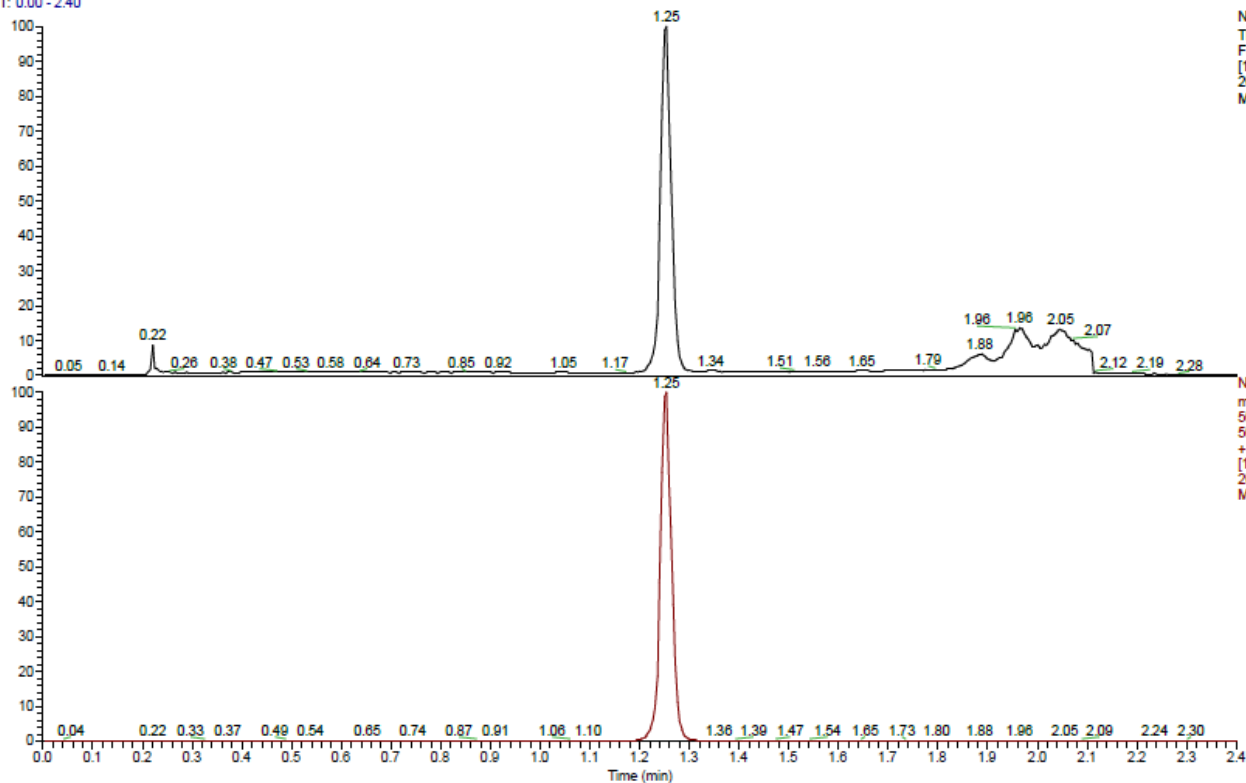

NL: 2.38E9  
TIC F: FTMS + p ESI  
Full ms  
[150.0000-  
2000.0000] MS  
Mix-78\_12

NL: 1.34E9  
m/z=  
504.70950-  
505.70950 F: FTMS  
+ p ESI Full ms  
[150.0000-  
2000.0000] MS  
Mix-78\_12

Mix-78\_12 #271-279 RT: 1.24-1.27 AV: 9 NL: 7.61E8  
T: FTMS + p ESI Full ms [150.0000-2000.0000]

505.2086  
C<sub>28</sub>H<sub>24</sub>N<sub>8</sub>O<sub>2</sub>  
-1.8704 ppm

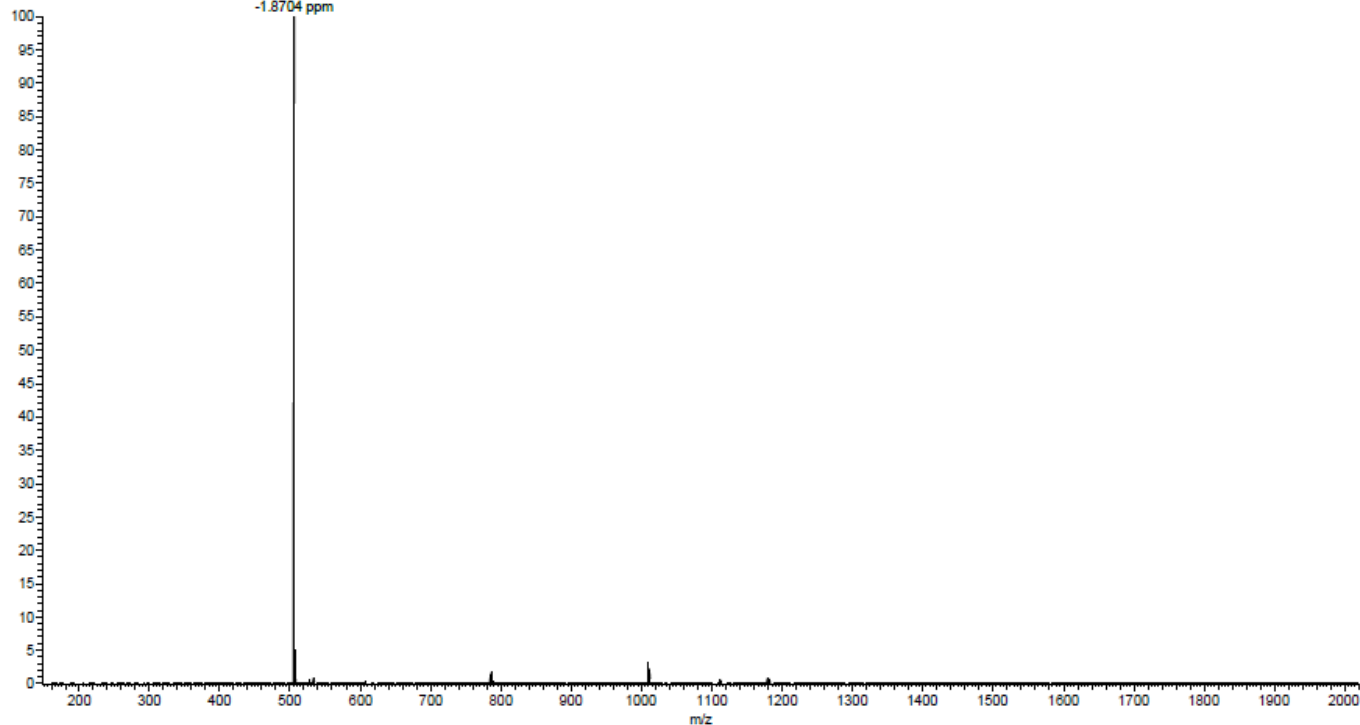

# Compound 20

**title** PINI22-85-1  
**Method** AN\_ACID.M  
**Date acquired** 05-Jul-18, 21:50:04  
**FileName** Analysis/LCMS6\_0705\_093.D  
**Column** XSelect CSH C18 (50x2.1mm, 3.5µ)  
 valve:3  
**Flow** 0.8 ml/min; Column temp: 35°C  
**Eluent A** 0.1% formic acid in acetonitrile  
**Eluent B** 0.1% formic acid in water  
**Gradient** t=0 min 5% A, t=3.5 min 98% A, t=6 min 98%A  
**Posttime** 2 min  
**Detection** DAD(210, 220 and 220-320nm)  
**Detection** PDA(210-320nm)  
**Detection** MSD (ESI pos/neg) mass range: 100 - 1000  
**Detection** ELSD gas temp: 40°C, flow 1.5 ml/min, gain 1

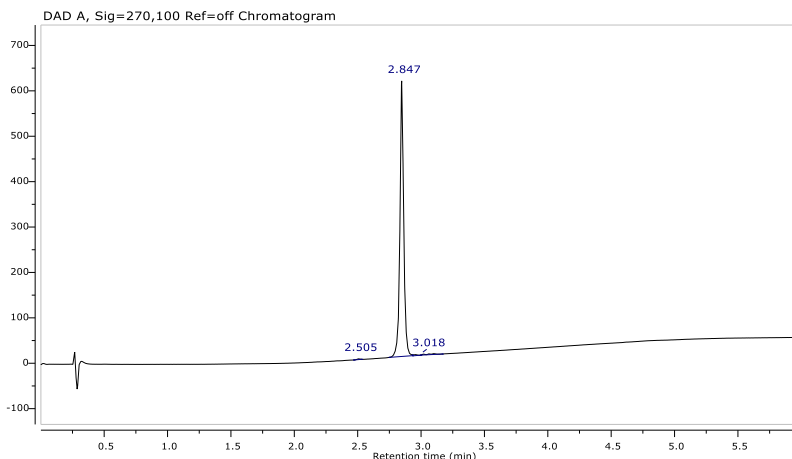

Integrals spectrum Chromatogram DAD A, Sig=270,100 Ref=off

| rt (min) | height | area    | area (%) |
|----------|--------|---------|----------|
| 2.50     | 1.644  | 0.04149 | 0.20     |
| 2.85     | 607.0  | 20.92   | 98.75    |
| 2.96     | 2.220  | 0.07104 | 0.34     |
| 3.02     | 1.936  | 0.1515  | 0.72     |

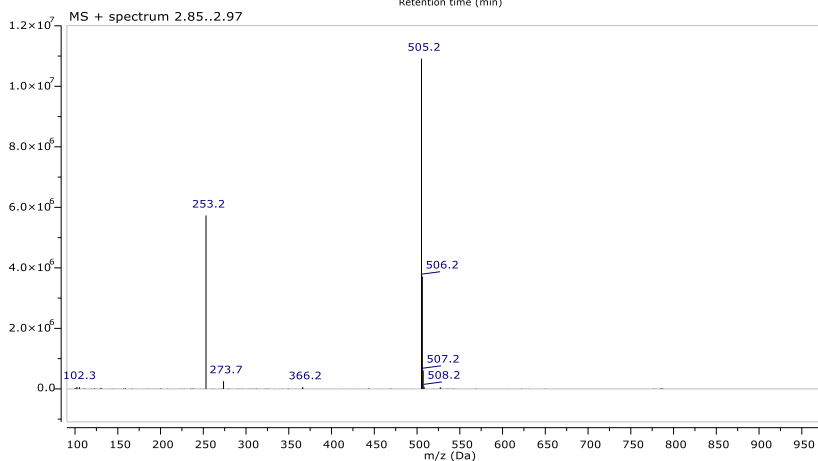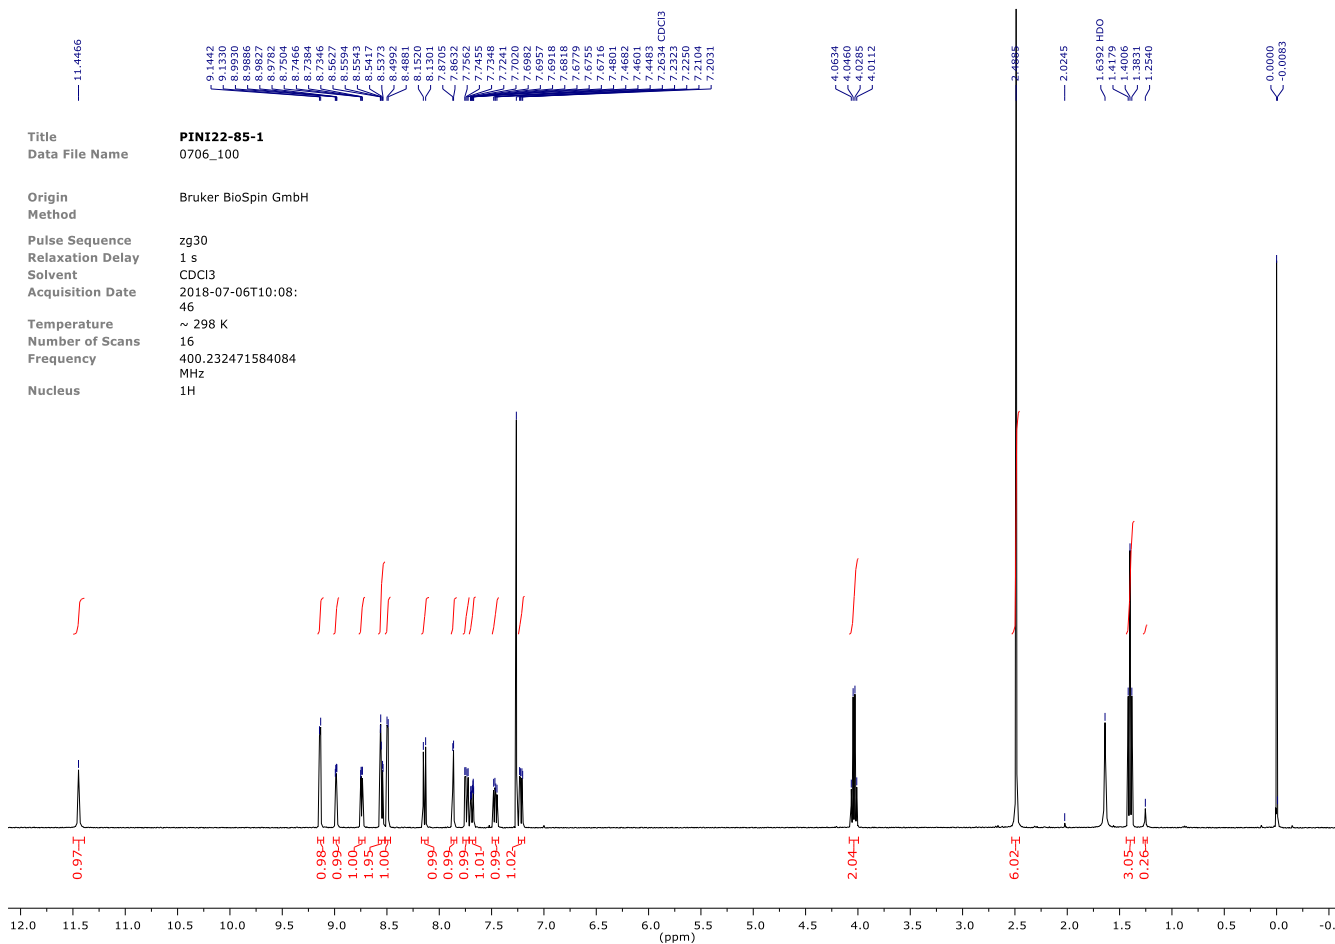

HRMS (m/z): C<sub>28</sub>H<sub>24</sub>N<sub>8</sub>O<sub>2</sub>, [M+H]<sup>+</sup> Calc: 505.20950; found: 505.2085, Δppm -2.01

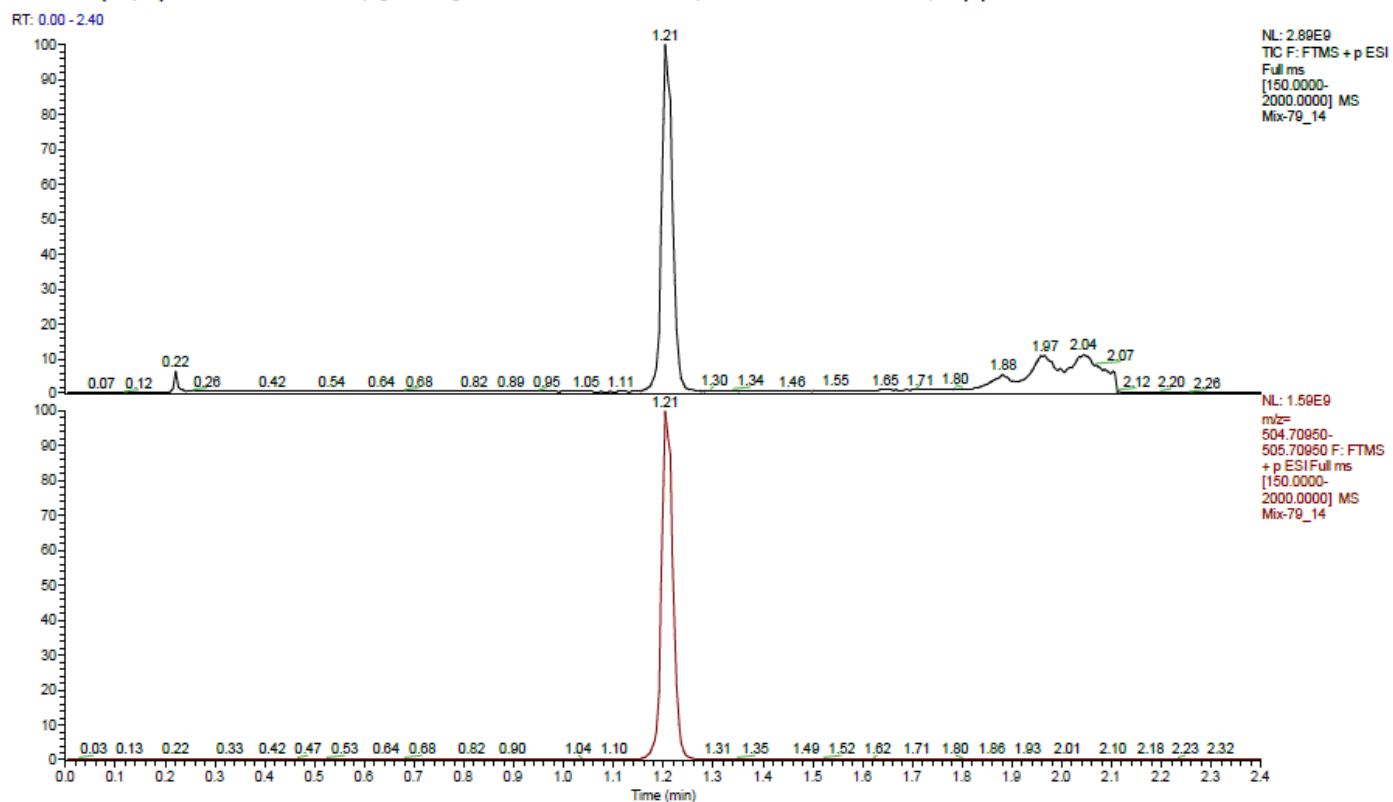

Mix-79\_14 #281-288 RT: 1.19-1.22 AV: 8 NL: 9.88E8  
T: FTMS + p ESI Full ms [150,0000-2000,0000]

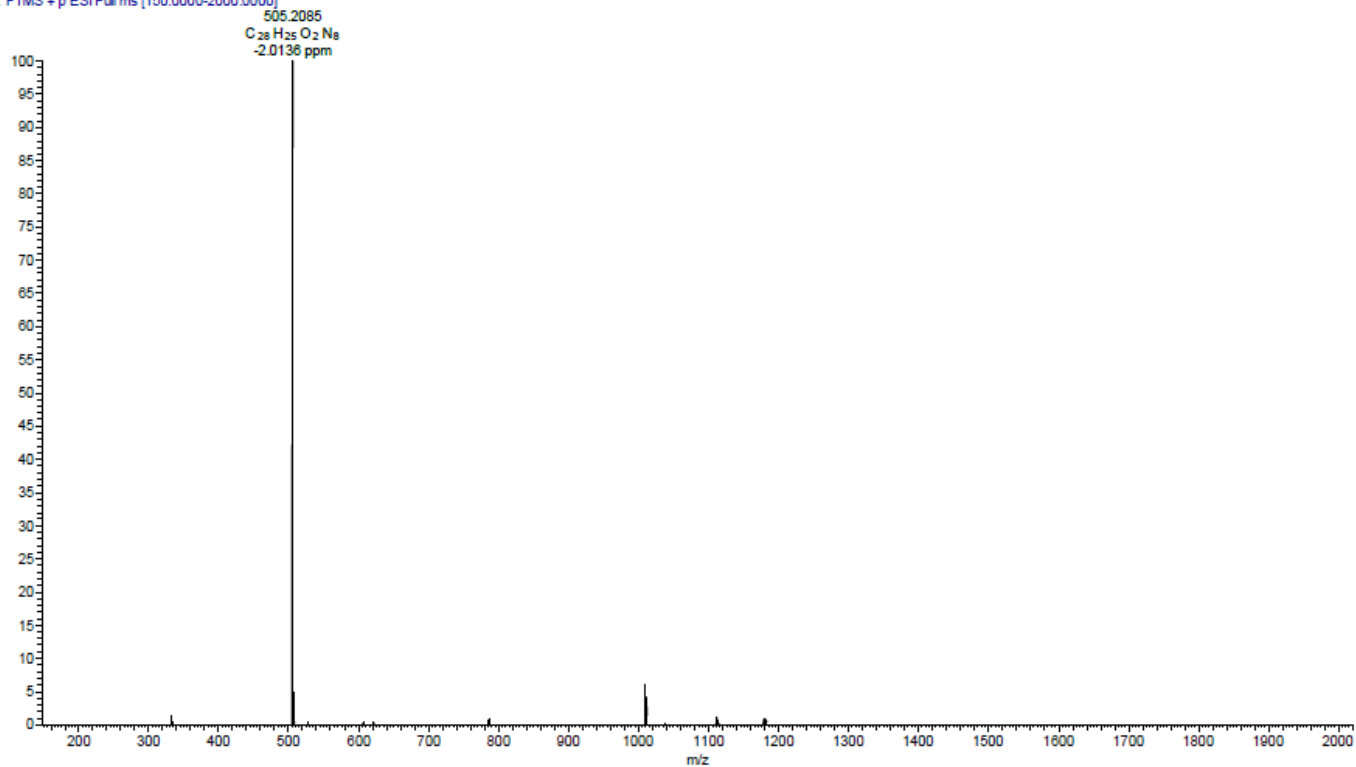

# Compound 21

**title** PINI22-86-1  
**Method** AN\_ACID.M  
**Date acquired** 05-Jul-18, 21:58:27  
**FileName** Analysis/LCMS6\_0705\_094.D  
**Column** XSelect CSH C18 (50x2.1mm, 3.5µ)  
 valve:3  
**Flow** 0.8 ml/min; Column temp: 35°C  
**Eluent A** 0.1% formic acid in acetonitrile  
**Eluent B** 0.1% formic acid in water  
**Gradient** t=0 min 5% A, t=3.5 min 98% A, t=6 min 98%A  
**Posttime** 2 min  
**Detection** DAD(210, 220 and 220-320nm)  
**Detection** PDA(210-320nm)  
**Detection** MSD (ESI pos/neg) mass range: 100 - 1000  
**Detection** ELSD gas temp: 40°C, flow 1.5 ml/min, gain 1

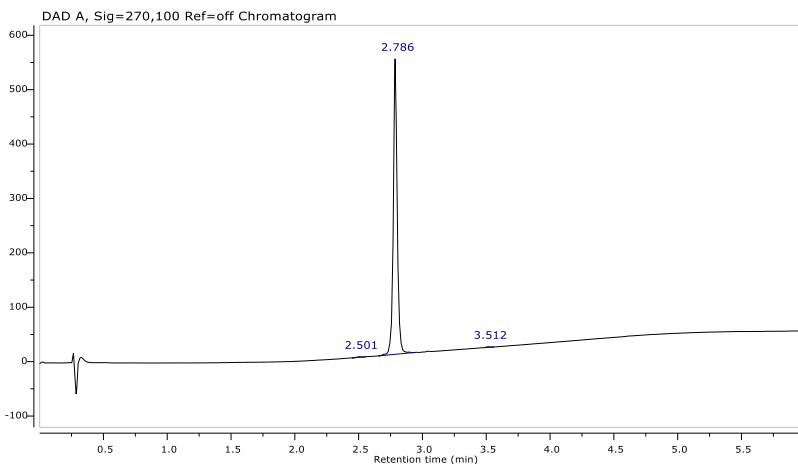

Integrals spectrum Chromatogram DAD A, Sig=270,100 Ref=off

| rt (min) | height | area    | area (%) |
|----------|--------|---------|----------|
| 2.50     | 1.141  | 0.04251 | 0.22     |
| 2.79     | 543.3  | 19.08   | 99.61    |
| 3.51     | 1.156  | 0.03178 | 0.17     |

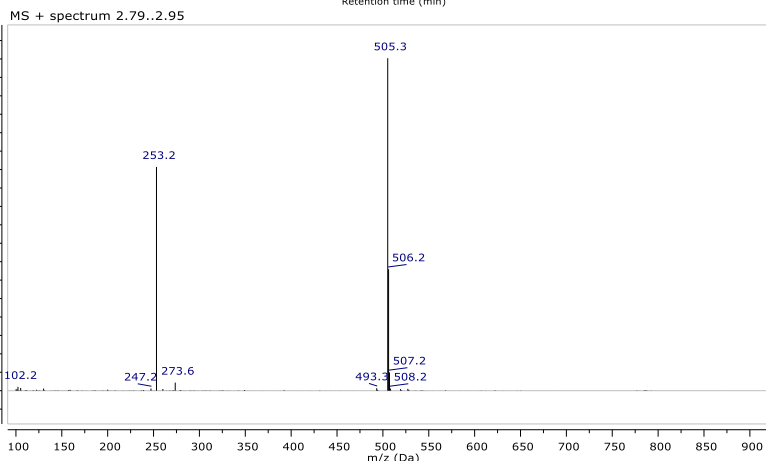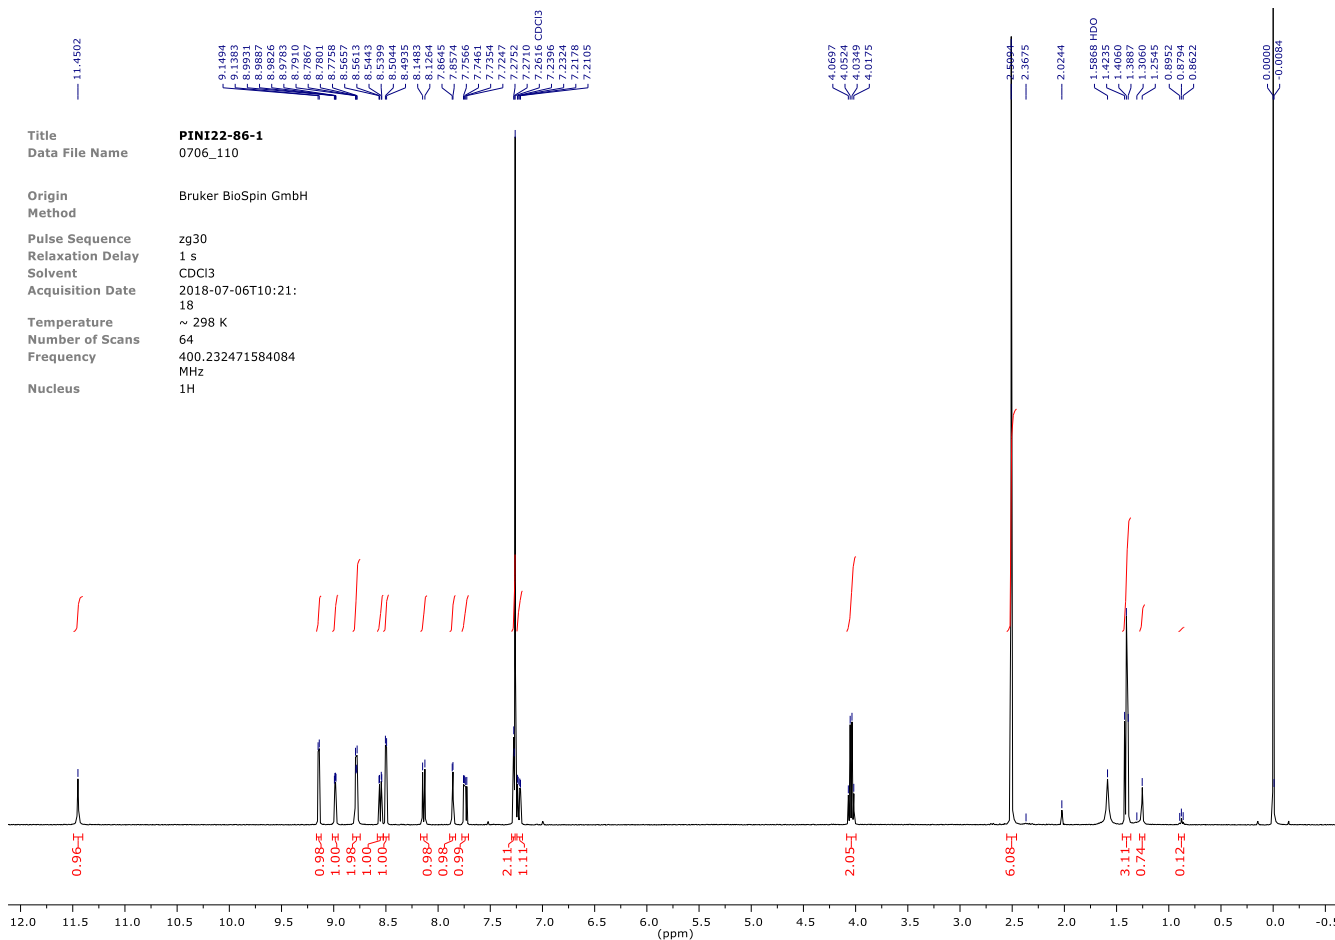

HRMS (m/z): C<sub>28</sub>H<sub>24</sub>N<sub>8</sub>O<sub>2</sub>, [M+H]<sup>+</sup> Calc: 505.20950; found: 505.2085, Δppm -2.02

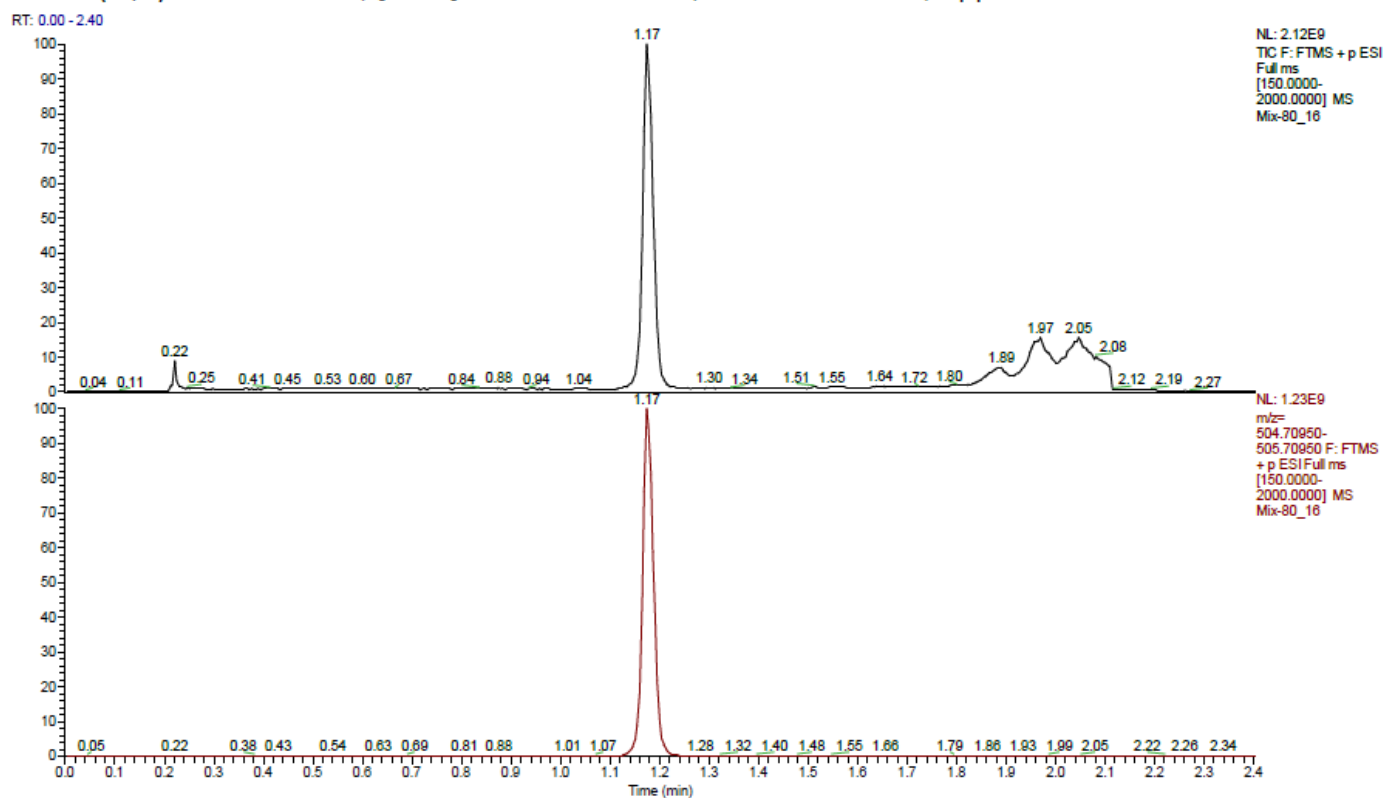

Mix-80 16 #253-260 RT: 1.16-1.19 AV: 8 NL: 7.51E8  
T: FTMS + p ESI Full ms [150.0000-2000.0000]

505.2085  
C<sub>28</sub>H<sub>24</sub>N<sub>8</sub>O<sub>2</sub>  
-2.0210 ppm

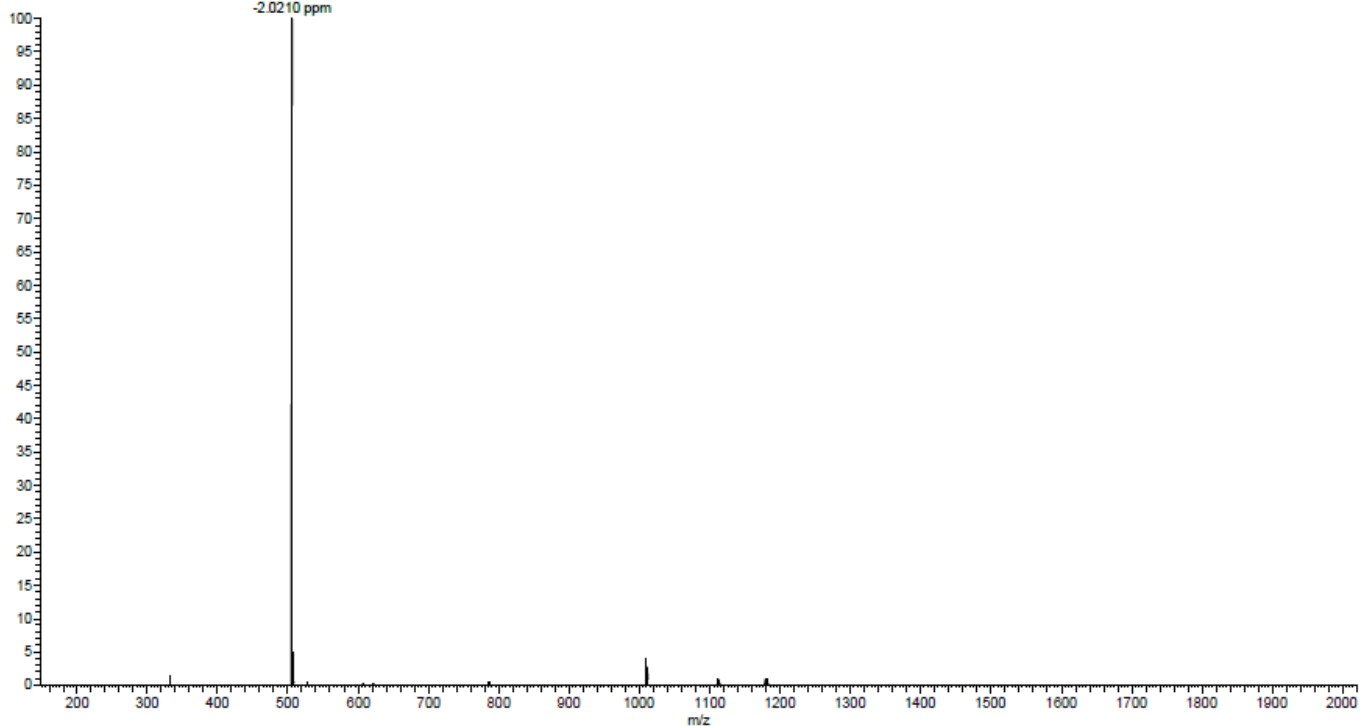

# Compound 22a

**title** PINI23-82-1  
**Method** AN\_ACID.M  
**Date acquired** 06-Dec-18, 17:29:41  
**FileName** Analysis/LCMS6\_1206\_116.D  
**Column** XSelect CSH C18 (50x2.1mm, 3.5µ) valve:3  
**Flow** 0.8 ml/min; Column temp: 35°C  
**Eluent A** 0.1% formic acid in acetonitrile  
**Eluent B** 0.1% formic acid in water  
**Gradient** t=0 min 5% A, t=3.5 min 98% A, t=6 min 98%A  
**Posttime** 2 min  
**Detection** DAD(210, 220 and 220-320nm)  
**Detection** PDA(210-320nm)  
**Detection** MSD (ESI pos/neg) mass range: 100 - 1000  
**Detection** ELSD gas temp: 40°C, flow 1.5 ml/min, gain 1

DAD A, Sig=270,100 Ref=off Chromatogram

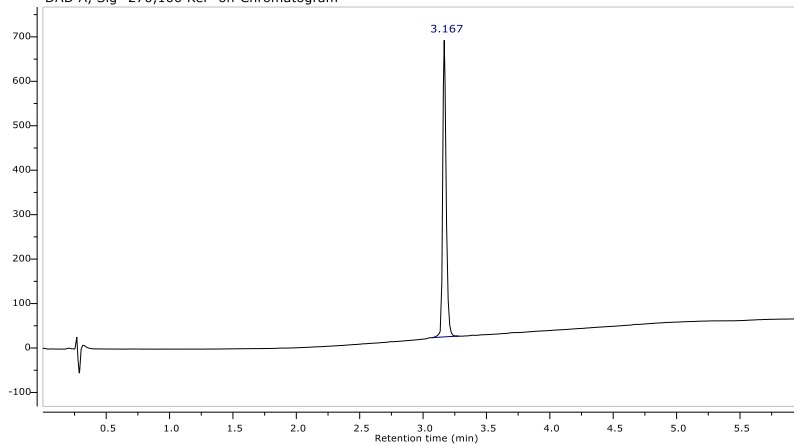

**Integrals spectrum** Chromatogram DAD A, Sig=270,100 Ref=off  

| rt (min) | height | area  | area (%) |
|----------|--------|-------|----------|
| 3.17     | 667.3  | 20.99 | 100.00   |

MS + spectrum 3.17...3.29

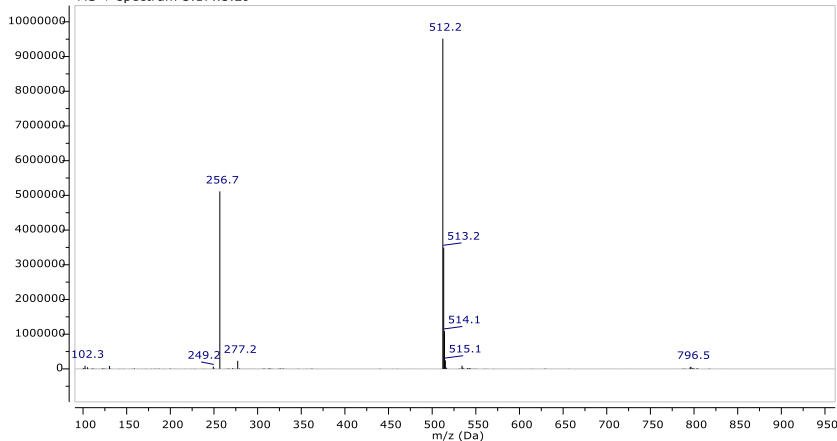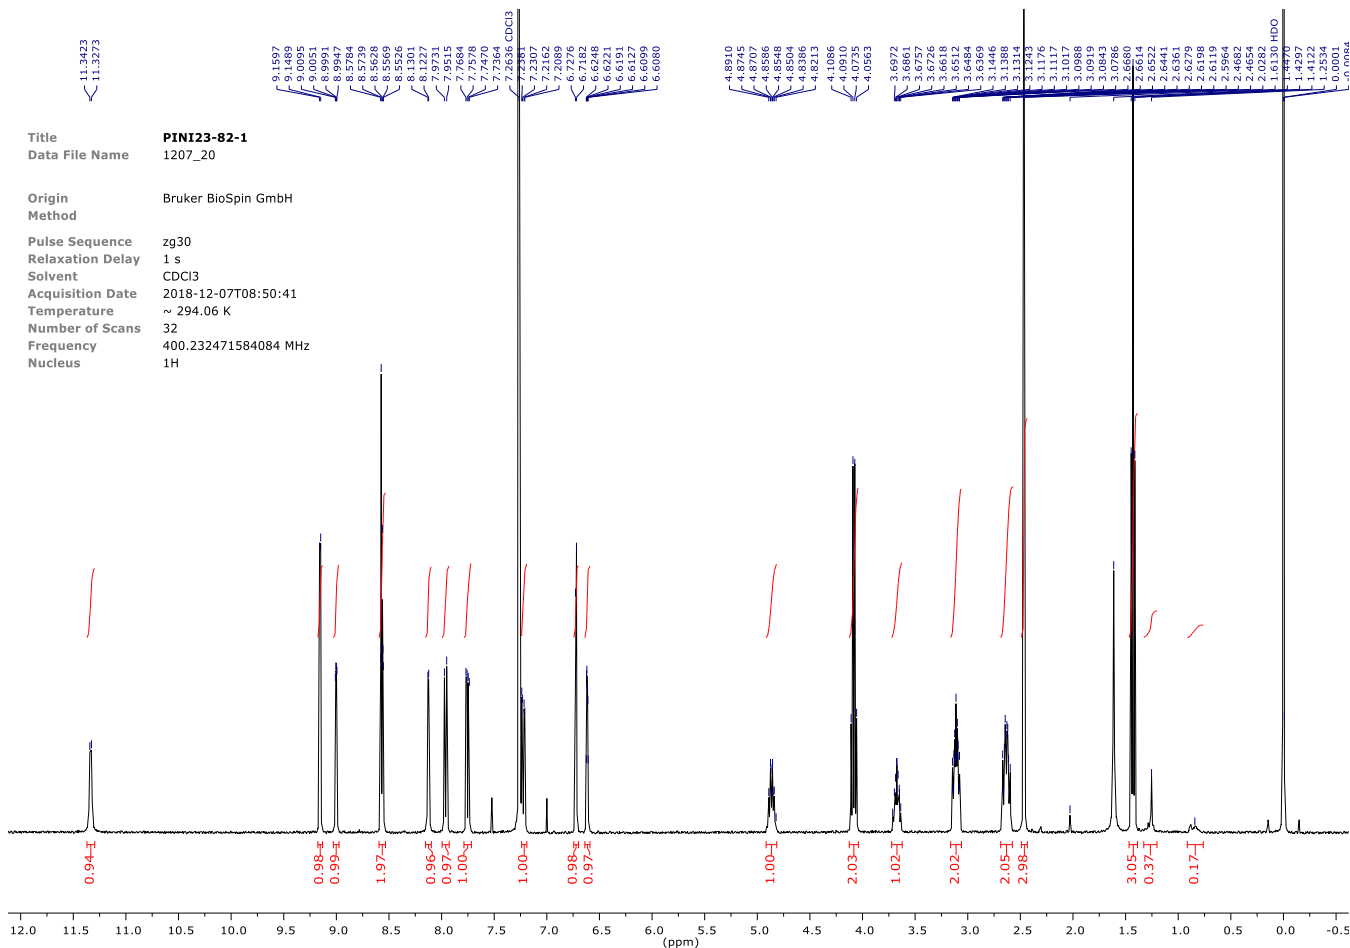



HRMS (m/z): C<sub>27</sub>H<sub>25</sub>N<sub>7</sub>O<sub>2</sub>S, [M+H]<sup>+</sup> Calc: 512.18632; found: 512.1854, Δppm -1.73

RT: 0.00 - 2.40

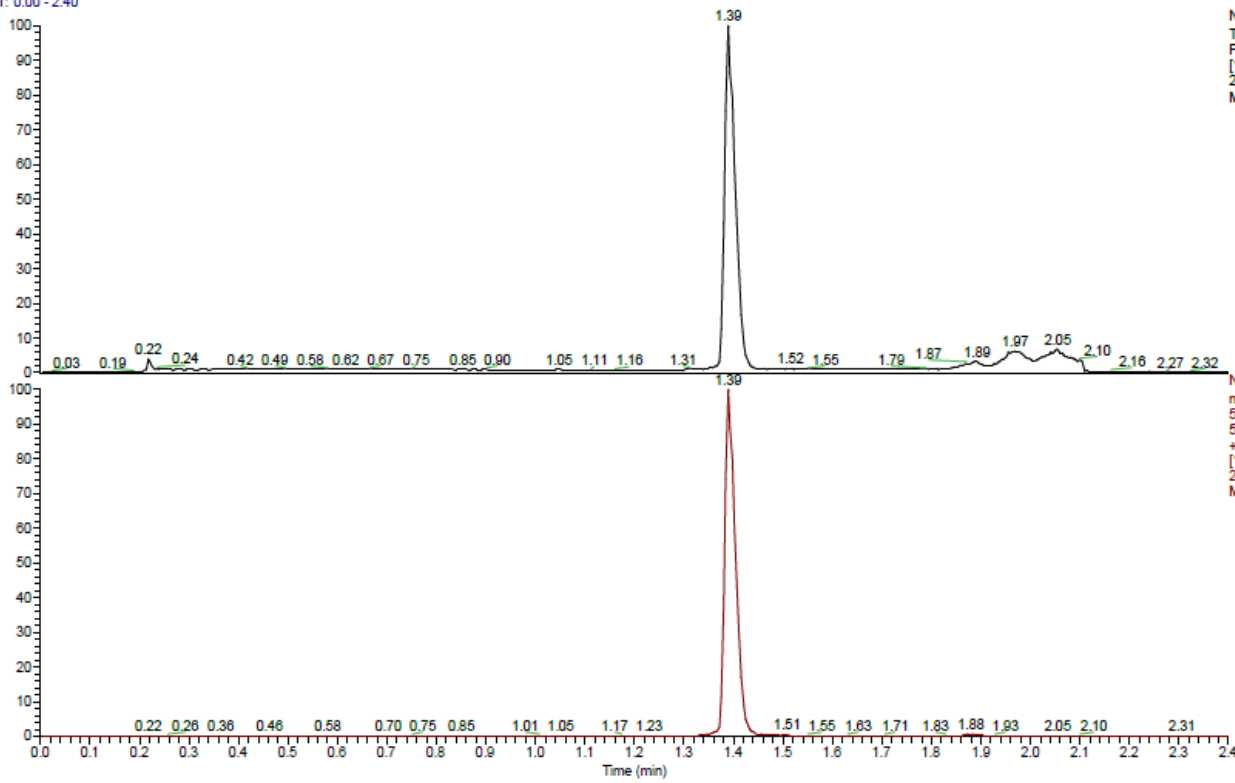

NL: 4.43E9  
TIC F: FTMS + p ESI  
Full ms  
[150.0000-  
2000.0000] MS  
Mix-39\_16

NL: 2.24E9  
m/z=  
511.68632-  
512.68632 F: FTMS  
+ p ESI Full ms  
[150.0000-  
2000.0000] MS  
Mix-39\_16

Mix-39 16 #301-312 RT: 1.37-1.42 AV: 12 NL: 9.94E8  
T: FTMS + p ESI Full ms [150.0000-2000.0000]

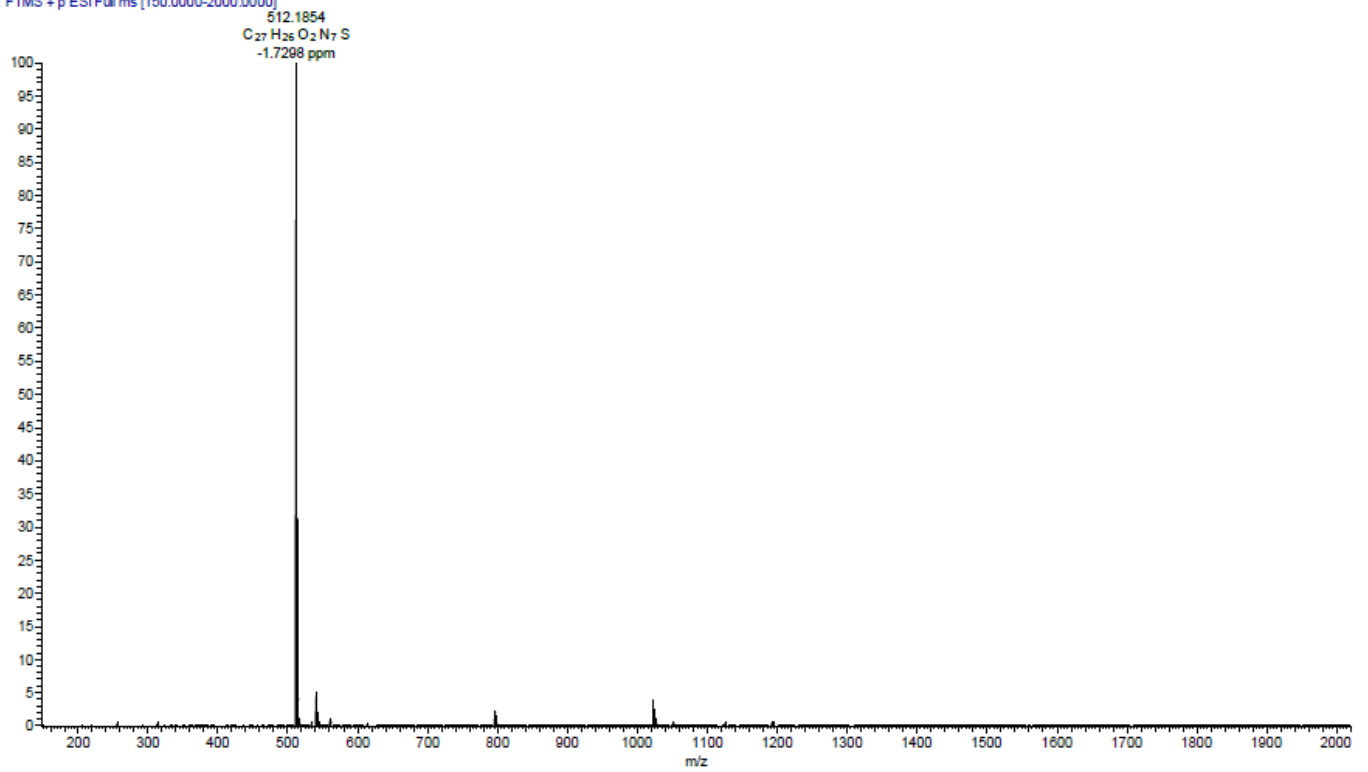

# Compound 22b

title **sjae 54 230-2**  
 Method AN\_BASE.M  
 Date acquired 11-Jan-18, 17:46:50  
 FileName Analysis\LCMS5\_0111\_097.D  
 Acq. method AN\_BASE valve: 2  
 Column Waters XSelect CSH C18 (50x2.1mm, 3.5µ)  
 Flow 0.8 ml/min; Column temp: 25°C  
 Eluent A 95% acetonitrile + 5% 10 mM ammoniumbicarbonate in water  
 Eluent B 10mM ammoniumbicarbonate in water  
 Lin. Gradient t=0 min 5% A, t=3.5 min 98% A, t=6 min 98% A  
 Posttime 2 min  
 Detection DAD (210, 220 and 220-320 nm)  
 Detection PDA (210-320 nm)  
 Detection MSD (ESI pos/neg) mass range: 100-800

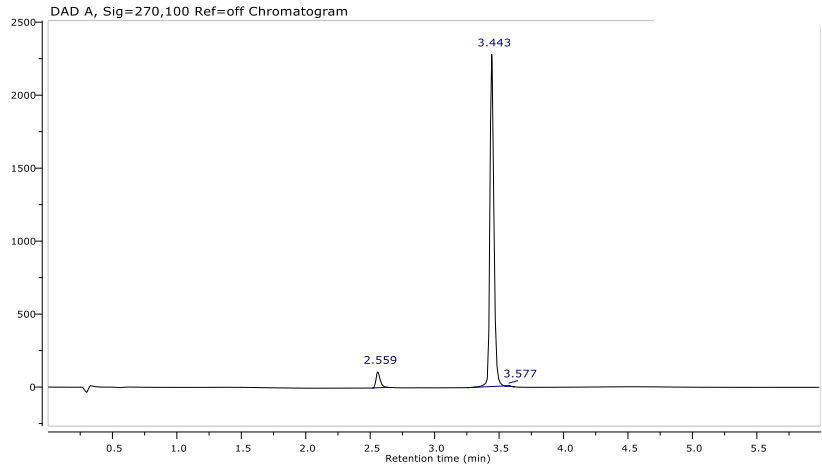

| rt (min) | height | area   | area (%) |
|----------|--------|--------|----------|
| 2.56     | 109.2  | 3.999  | 4.68     |
| 3.44     | 2276   | 81.19  | 95.10    |
| 3.58     | 6.724  | 0.1836 | 0.22     |

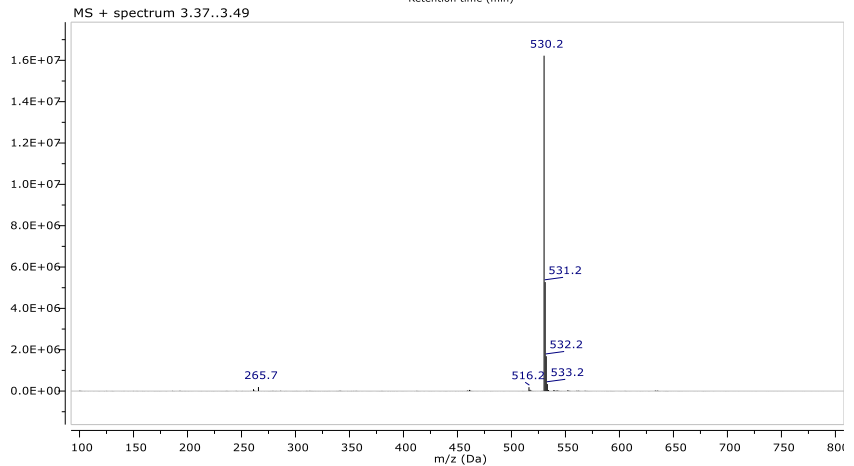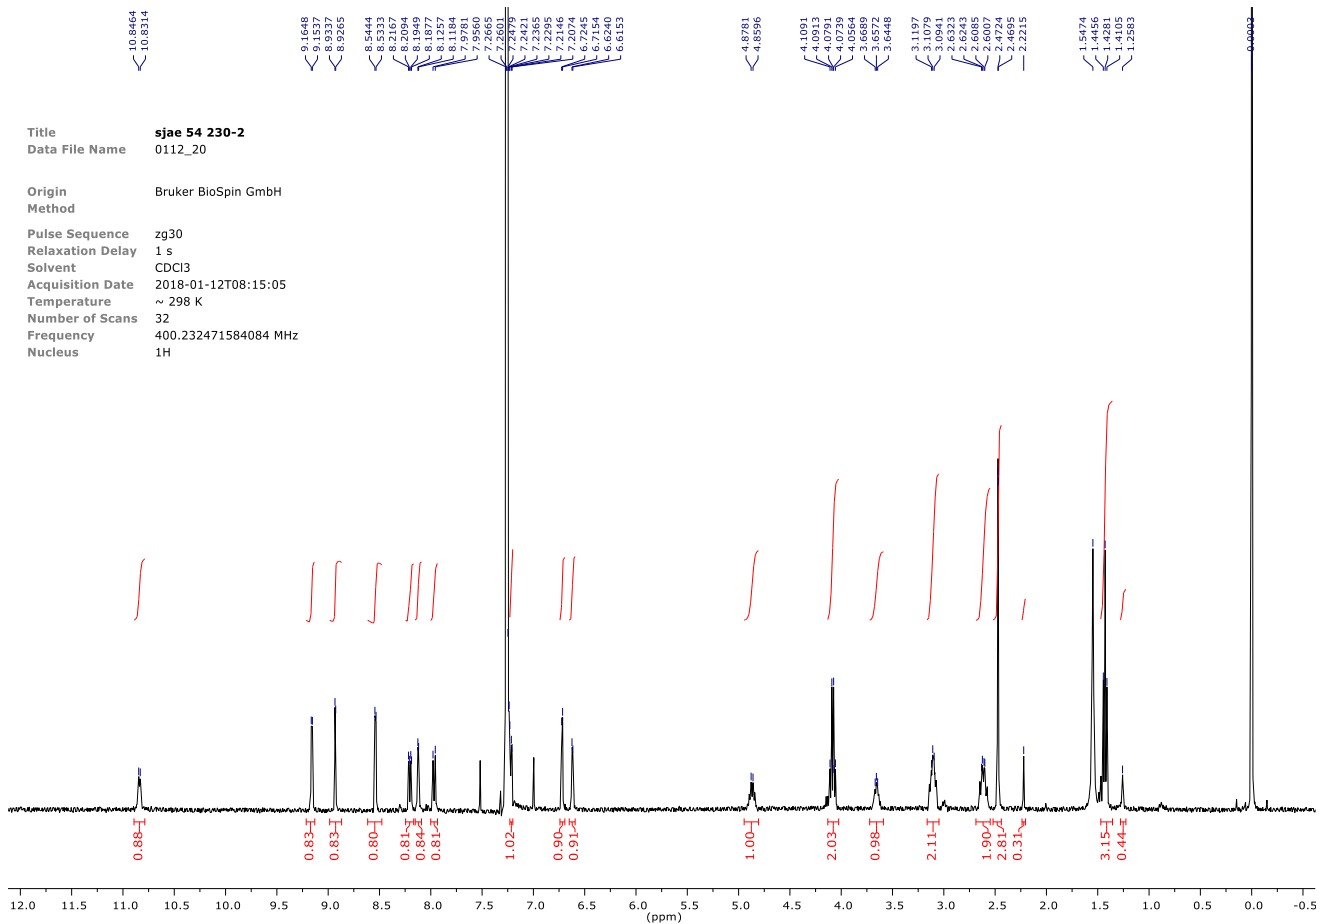

HRMS (m/z): C<sub>27</sub>H<sub>24</sub>N<sub>7</sub>O<sub>2</sub>FS, [M+H]<sup>+</sup> Calc: 530.17690; found: 530.1761, Δppm -1.59

RT: 0.00 - 2.40

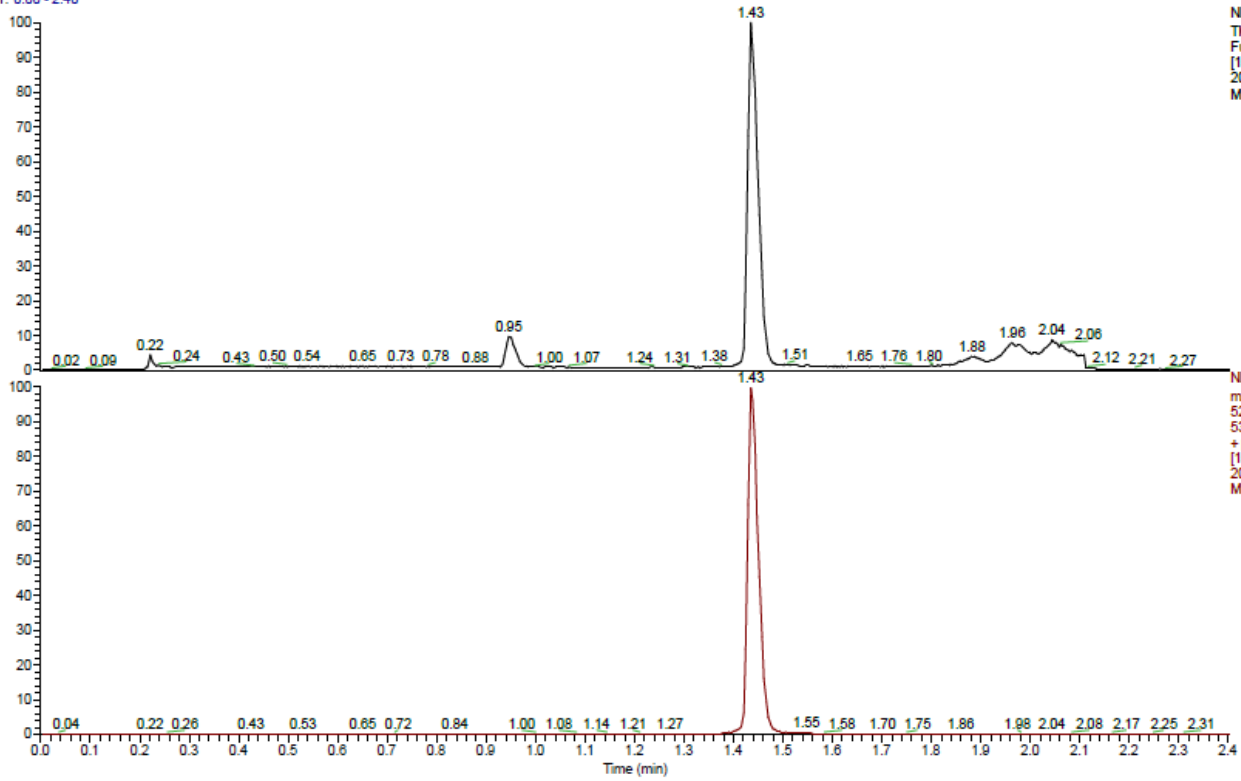

NL: 3.50E9  
TIC F: FTMS + p ESI  
Full ms  
[150.0000-  
2000.0000] MS  
Mix-64\_24

NL: 1.74E9  
m/z=  
529.67690-  
530.67690 F: FTMS  
+ p ESI Full ms  
[150.0000-  
2000.0000] MS  
Mix-64\_24

Mix-64 24 #310-323 RT: 1.41-1.47 AV: 14 NL: 6.43E8  
T: FTMS + p ESI Full ms [150.0000-2000.0000]

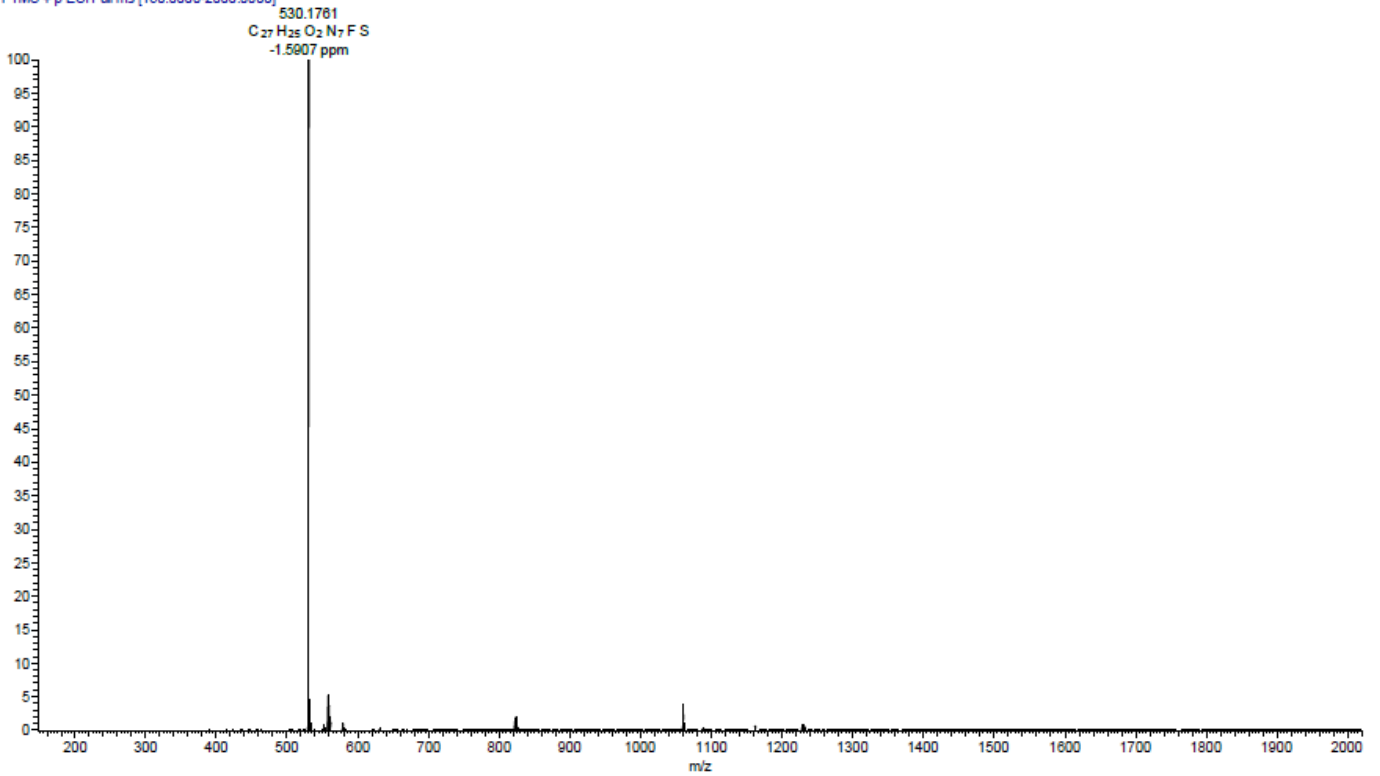

# Compound 23

**title** sjae 54 232-2  
**Method** AN\_BASE.M  
**Date acquired** 11-Jan-18, 18:03:54  
**FileName** Analysis\LCMS5\_0111\_099.D  
**Acq. method** AN\_BASE valve: 2  
**Column** Waters XSelect CSH C18 (50x2.1mm, 3.5µ)  
**Flow** 0.8 ml/min; Column temp: 25°C  
**Eluent A** 95% acetonitrile + 5% 10 mM ammoniumbicarbonate in water  
**Eluent B** 10mM ammoniumbicarbonate in water  
**Lin. Gradient** t=0 min 5% A, t=3.5 min 98% A, t=6 min 98% A  
**Posttime** 2 min  
**Detection** DAD (210, 220 and 220-320 nm)  
**Detection** PDA (210-320 nm)  
**Detection** MSD (ESI pos/neg) mass range: 100-800

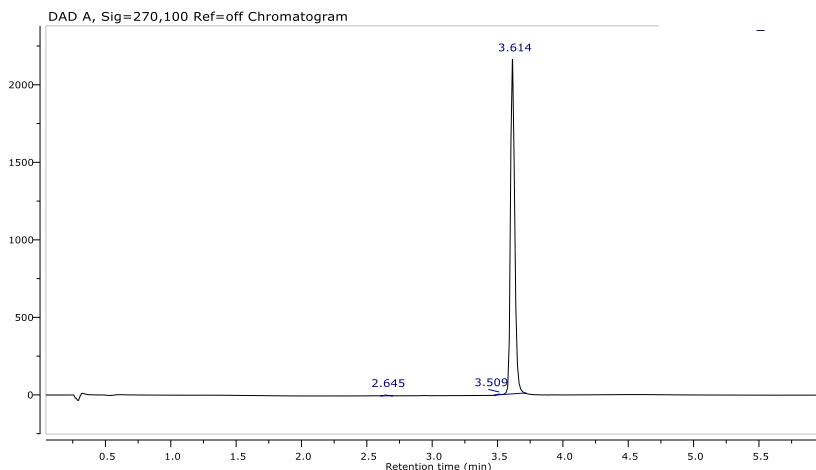

Integrals spectrum Chromatogram DAD A, Sig=270,100 Ref=off

| rt (min) | height | area   | area (%) |
|----------|--------|--------|----------|
| 2.64     | 4.779  | 0.1530 | 0.19     |
| 3.51     | 4.086  | 0.1050 | 0.13     |
| 3.61     | 2157   | 80.90  | 99.68    |

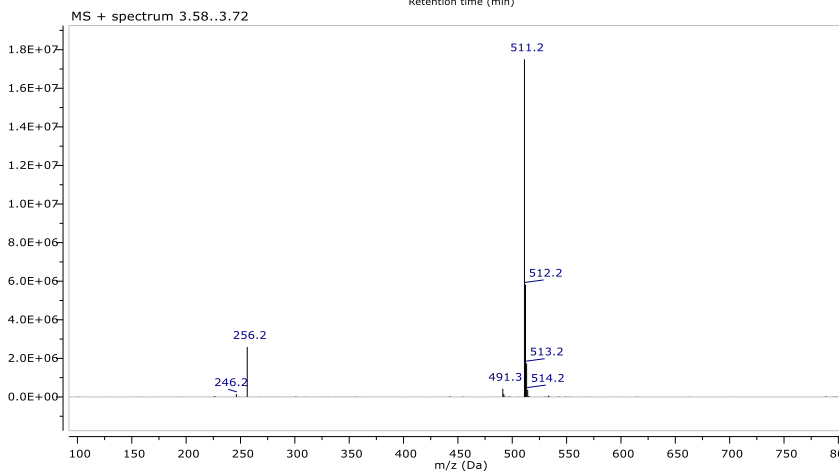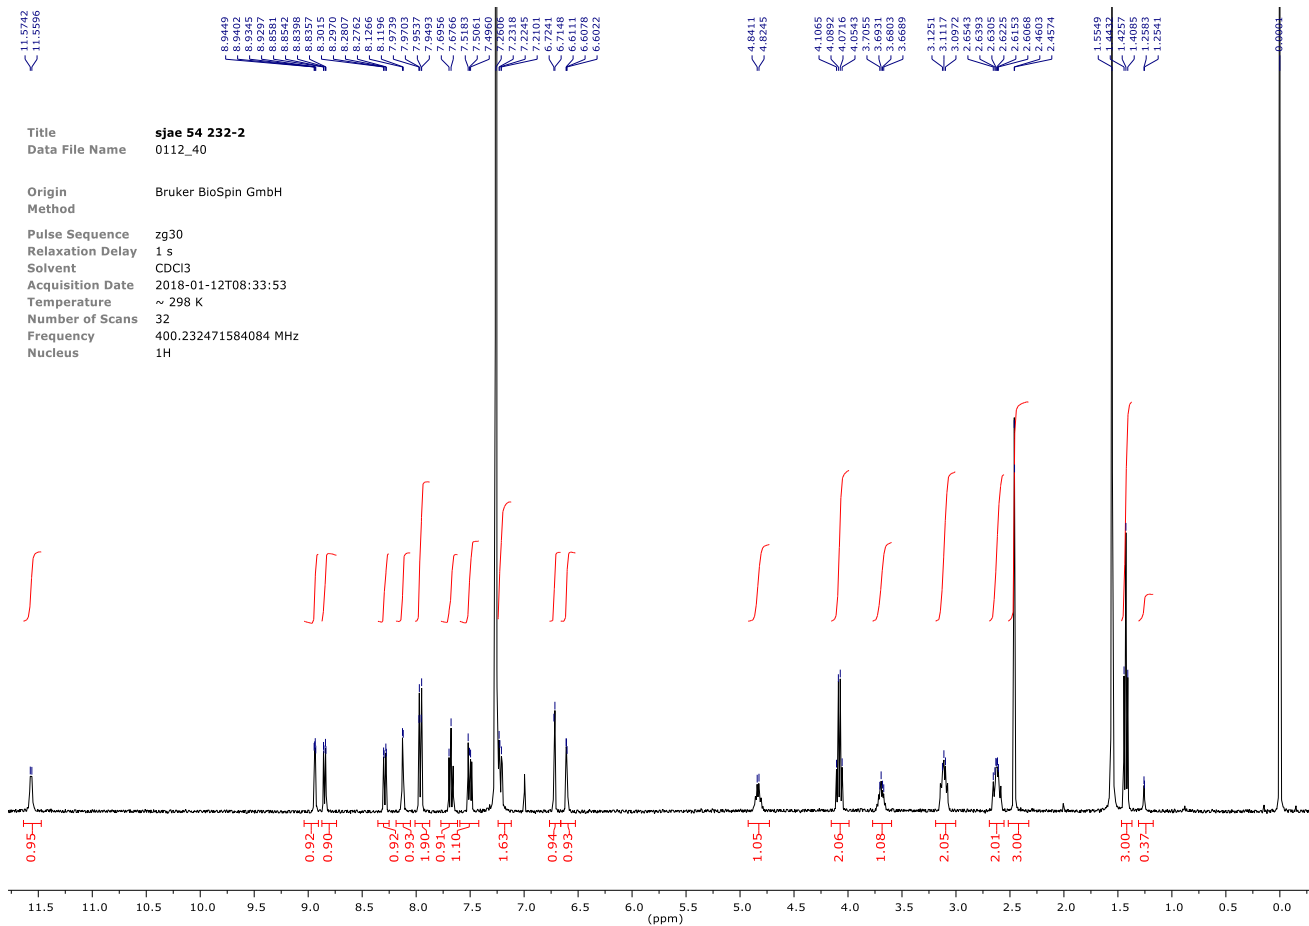

HRMS (m/z): C<sub>28</sub>H<sub>26</sub>N<sub>6</sub>O<sub>2</sub>S, [M+H]<sup>+</sup> Calc: 511.19107; found: 511.1902, Δppm -1.63

RT: 0.00 - 2.40

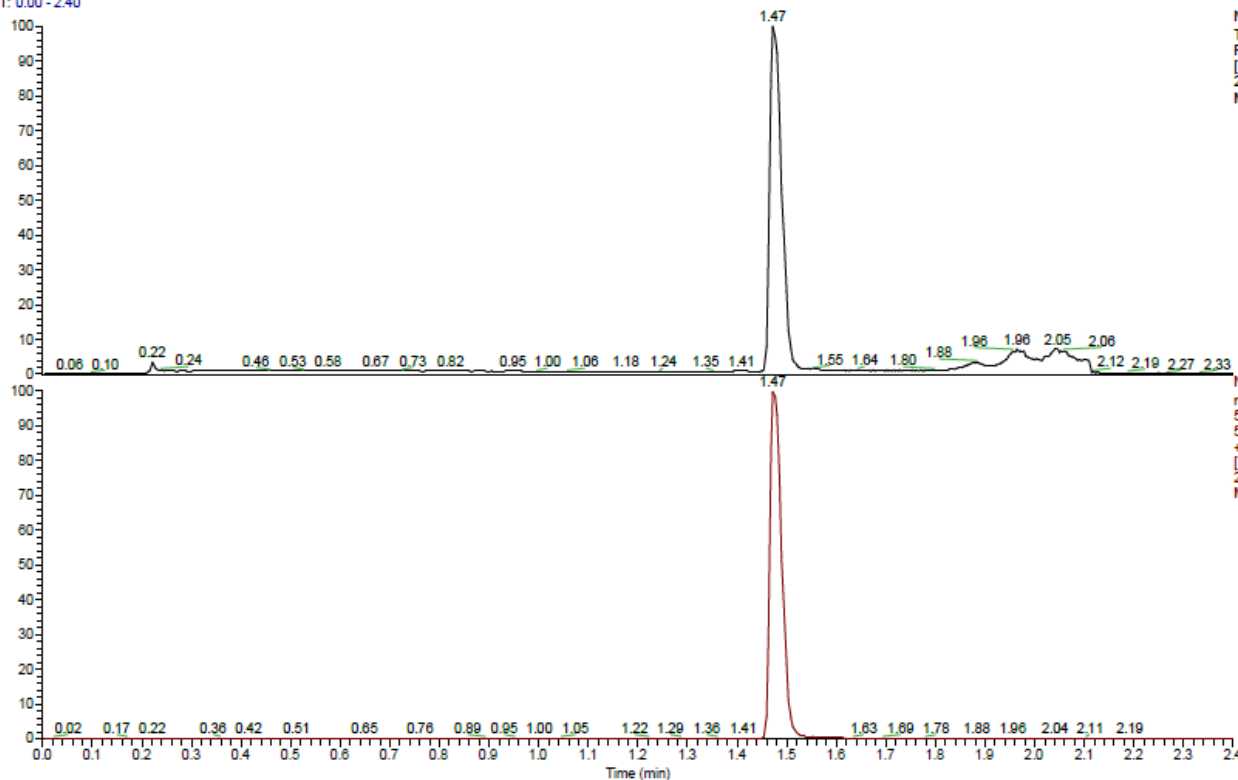

NL: 4.06E9  
TIC F: FTMS + p ESI  
Full ms  
[150.0000-  
2000.0000] MS  
Mix-63\_20

NL: 1.92E9  
m/z=  
510.99107-  
511.99107 F: FTMS  
+ p ESI Full ms  
[150.0000-  
2000.0000] MS  
Mix-63\_20

Mix-63\_20 #320-331 RT: 1.46-1.51 AV: 12 NL: 9.15E8  
T: FTMS + p ESI Full ms [150.0000-2000.0000]

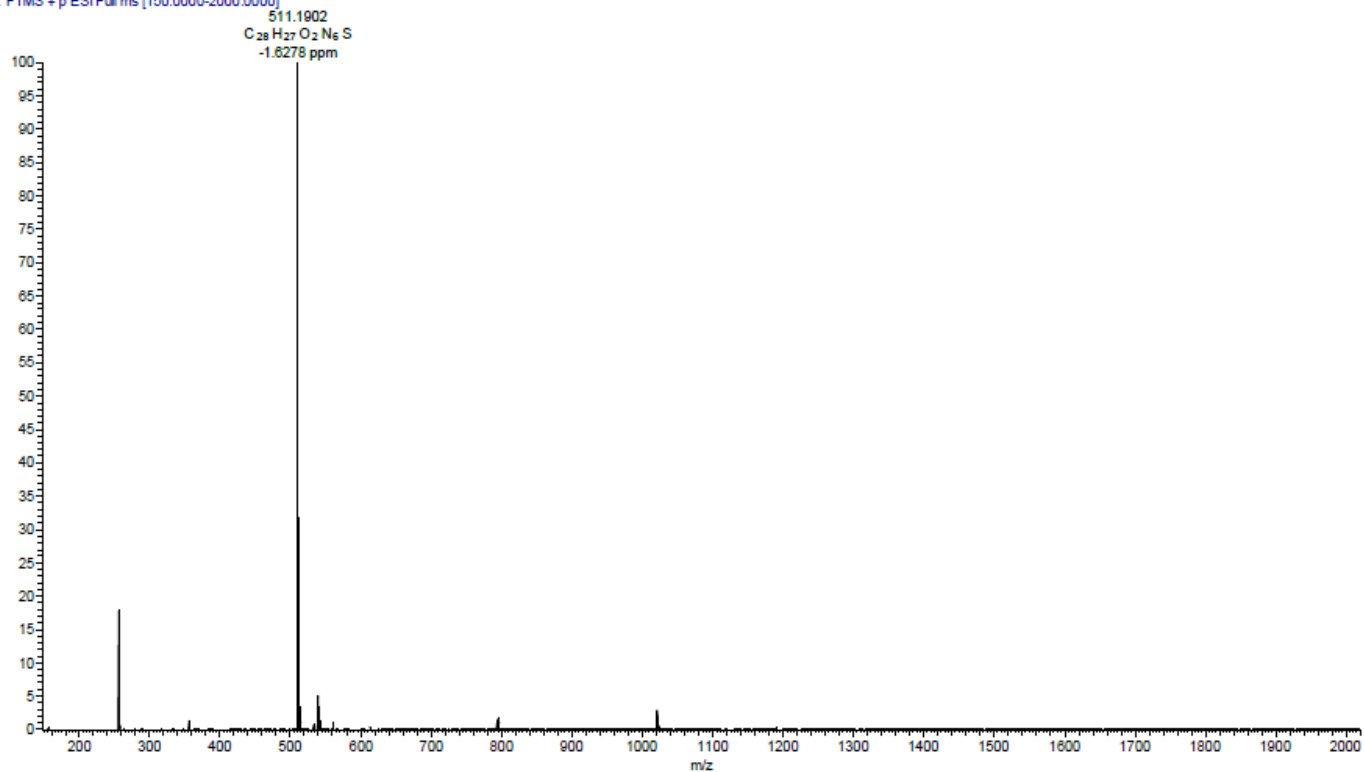

# Compound 24 (OM-153)

**title** PINI23-83-4  
**Method** AN\_BASE.M  
**Date acquired** 25-Jan-19, 16:55:31  
**FileName** Analysis\LCMS5\_0125\_080.D  
**Acq. method** AN\_BASE valve: 2  
**Column** Waters XSelect CSH C18 (50x2.1mm, 3.5µ)  
**Flow** 0.8 ml/min; Column temp: 25°C  
**Eluent A** 100% acetonitrile  
**Eluent B** 10mM ammoniumbicarbonate in water  
**Lin. Gradient** t=0 min 5% A, t=3.5 min 98% A, t=6 min 98% A  
**Posttime** 2 min  
**Detection** DAD (210, 220 and 220-320 nm)  
**Detection** PDA (210-320 nm)  
**Detection** MSD (ESI pos/neg) mass range: 100-1000

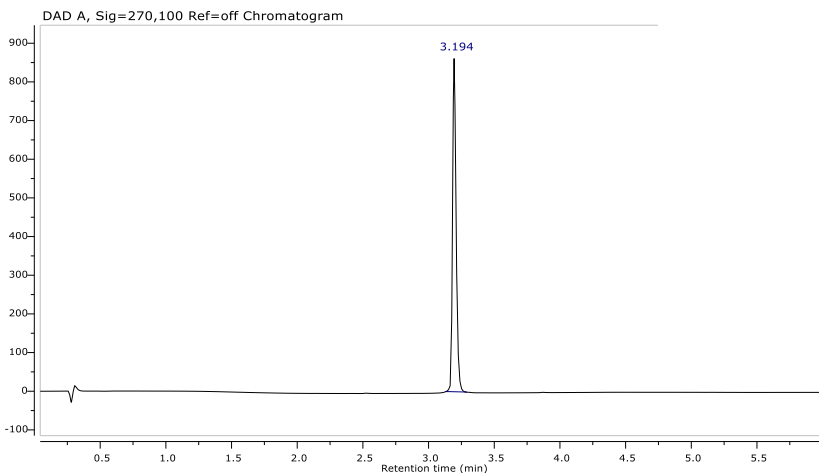

**Integrals spectrum** Chromatogram DAD A, Sig=270,100 Ref=off  

| rt (min) | height | area  | area (%) |
|----------|--------|-------|----------|
| 3.19     | 861.8  | 27.05 | 100.00   |

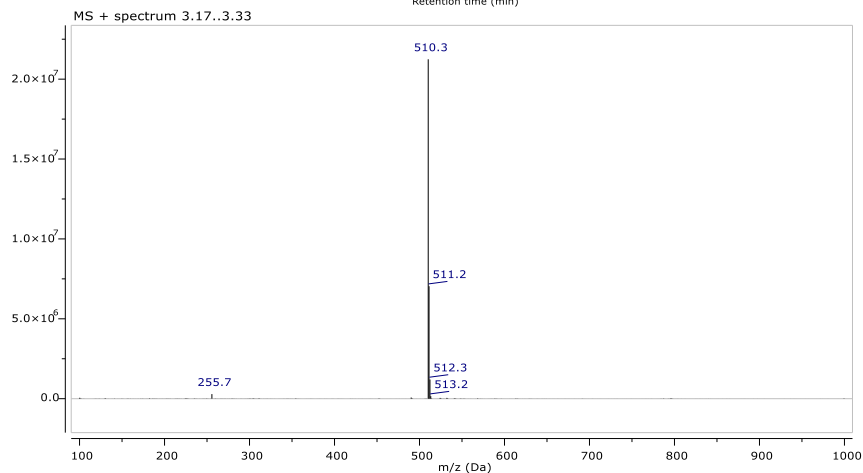

9.9537  
 9.9360  
 9.0669  
 8.9961  
 9.0361  
 9.0344  
 9.0245  
 8.3664  
 8.3472  
 8.3421  
 8.3384  
 8.2588  
 8.2551  
 8.2341  
 8.2241  
 8.0740  
 8.0522  
 7.9743  
 7.9449  
 7.9357  
 7.6030  
 7.5986  
 7.5903  
 7.5803  
 7.5788  
 7.5733  
 7.5692  
 7.5645  
 7.5595  
 7.5537  
 7.5494  
 7.5456  
 7.5342  
 7.5342  
 7.5176  
 7.5102  
 7.4957  
 7.4881  
 7.4881  
 7.4481  
 7.4306  
 7.4263  
 7.4225  
 7.4225  
 7.4021  
 7.3549  
 7.3515  
 7.3353  
 7.3353  
 7.3164  
 7.3164  
 7.3133  
 4.7940  
 4.7723  
 4.7656  
 4.7280  
 4.1304  
 4.1304  
 4.0955  
 4.0955  
 4.0434  
 4.0434  
 4.0246  
 3.3919  
 3.3806  
 3.3575  
 3.3575  
 3.3360 H2O  
 3.3265  
 2.8939  
 2.8939  
 2.8842  
 2.8644  
 2.8644  
 2.8549  
 2.8442  
 2.8351  
 2.8351  
 2.7977  
 2.6978  
 2.6878  
 2.6782  
 2.6782  
 2.6590  
 2.6590  
 2.6489  
 2.6387  
 2.5166 DMSO  
 2.5166 DMSO  
 2.5061 DMSO  
 2.5061 DMSO  
 2.5045 DMSO  
 2.4999 DMSO  
 2.4634  
 2.4634  
 2.4371  
 2.4371  
 2.4157  
 2.4015  
 2.3931  
 2.3931  
 2.3764  
 2.3764  
 2.3587  
 2.3512  
 2.3313  
 2.3313  
 1.9854  
 1.9854  
 1.3299  
 1.3127  
 1.2952  
 1.2952  
 1.1778  
 1.1778  
 1.1601  
 1.1601  
 0.0001

**Title** OM-153  
**Data File Name** NMR\_May03-2021\_80  
**Origin** Bruker BioSpin GmbH  
**Method** 1D  
**Pulse Sequence** zg30  
**Relaxation Delay** 1 s  
**Solvent** DMSO  
**Acquisition Date** 03 May 2021 (09:35)  
**Temperature** ~ 25 °C  
**Number of Scans** 16  
**Frequency** 400 MHz  
**Nucleus** 1H

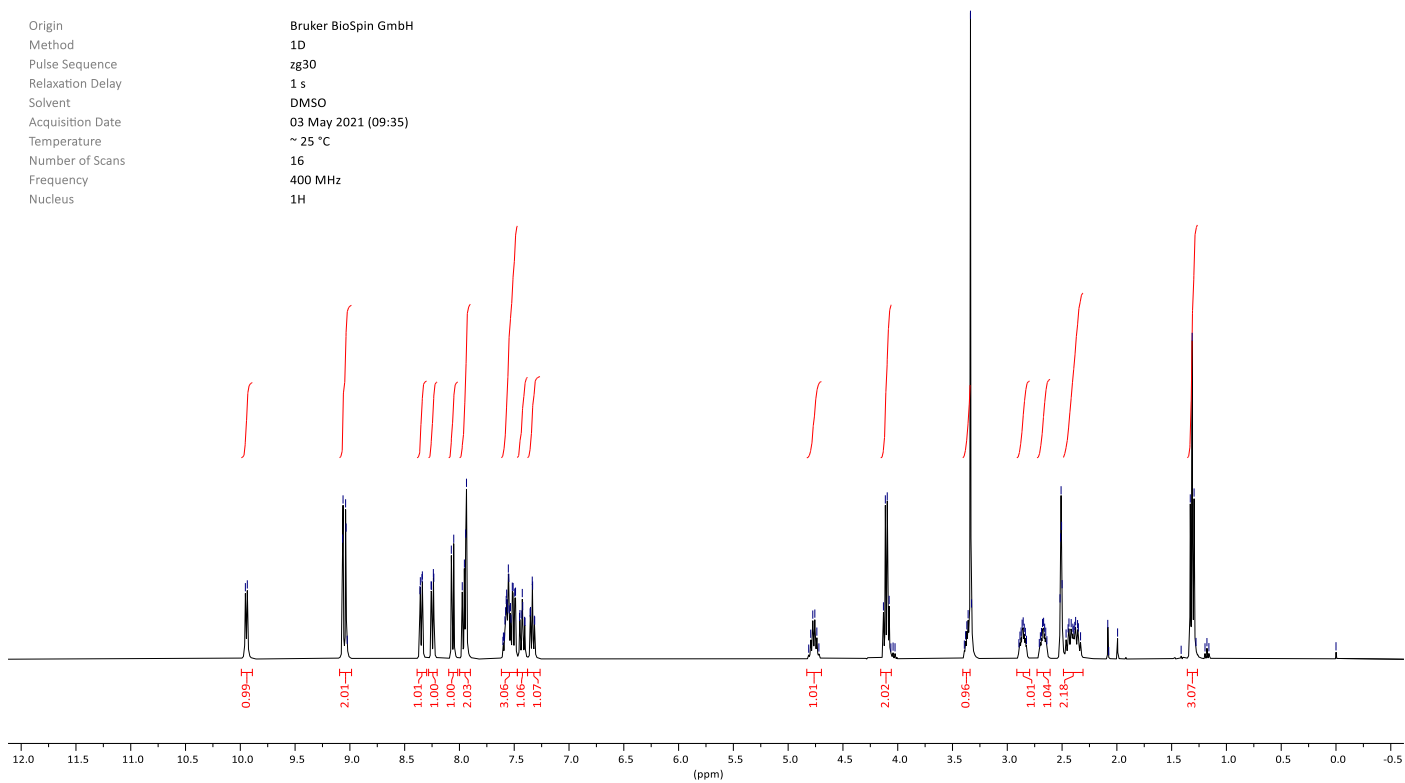

**title** PINI23-40-1  
**Date acquired** 25-Sep-2018, 19:01:04  
**FileName** Analysis\SFC1\_180925\_ch\_PINI\_17.raw  
**UPLC** Waters UPLC  
**Acq. Method** 3\_Cel1\_05-50\_f25\_P170\_Amm\_10min  
**Column** Phenomenex Cellulose-1 (100x4.6mm 5µm)  
**Flow** 2.5 ml/min; Column temp: 35°C; BPR: 170 bar  
**Eluent A** CO2  
**Eluent B** Methanol + 20mM ammonia  
**Gradient** t=0 min 5% B, t=7 min 50% B, t=10 min 50% B  
**Posttime** 0.5 min  
**Detection PDA** 210-320nm  
**MS** QDa  
**Detection MS** ESI (scan)  
**Mass range** 100-650 (pos), 1Hz  
**Time** 10 min  
**Cone** 15 V

PDA - Total Absorbance Chromatogram

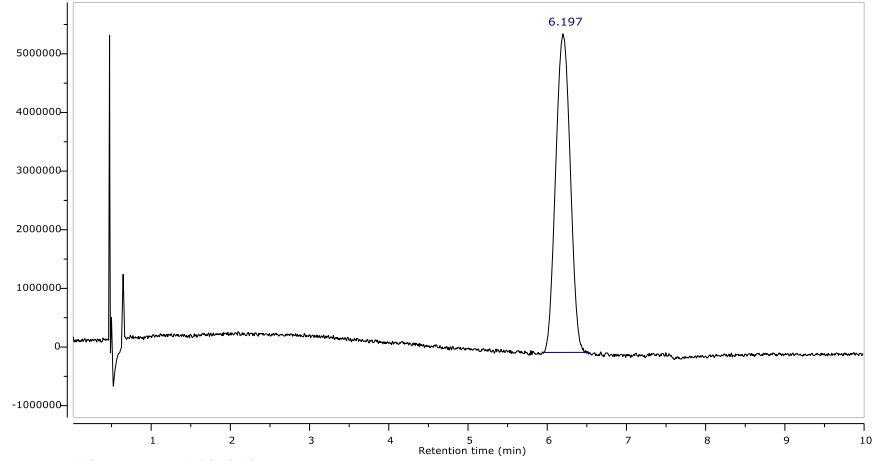

Integrals spectrum PDA - Total Absorbance Chromatogram

| rt (min) | height  | area    | area (%) |
|----------|---------|---------|----------|
| 6.20     | 5434219 | 1159261 | 100.00   |

MS + spectrum 5.98..6.50

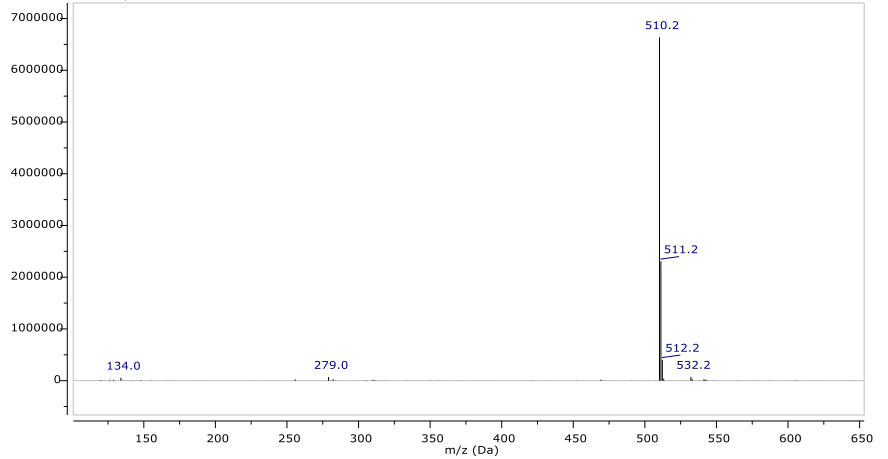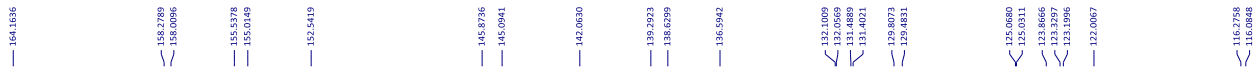

**Title** OM-153  
**Data File Name** NMR\_Apr30-2021\_630  
**Origin** Bruker BioSpin GmbH  
**Method** JM0D  
**Pulse Sequence** jmod  
**Relaxation Delay** 2 s  
**Solvent** DMSO  
**Acquisition Date** 01 May 2021 (19:39)  
**Temperature** ~ 25 °C  
**Number of Scans** 4096  
**Frequency** 101 MHz  
**Nucleus** 13C

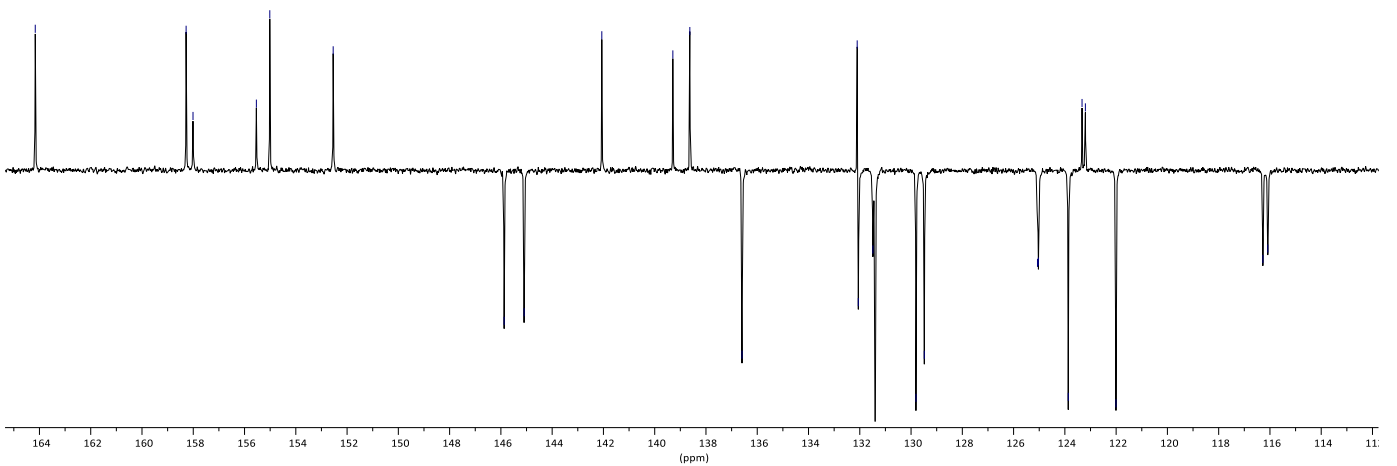

HRMS (m/z): C<sub>28</sub>H<sub>24</sub>N<sub>7</sub>O<sub>2</sub>F, [M+H]<sup>+</sup> Calc: 510.20483; found: 510.2040, Δppm -1.66

RT: 0.00 - 2.40

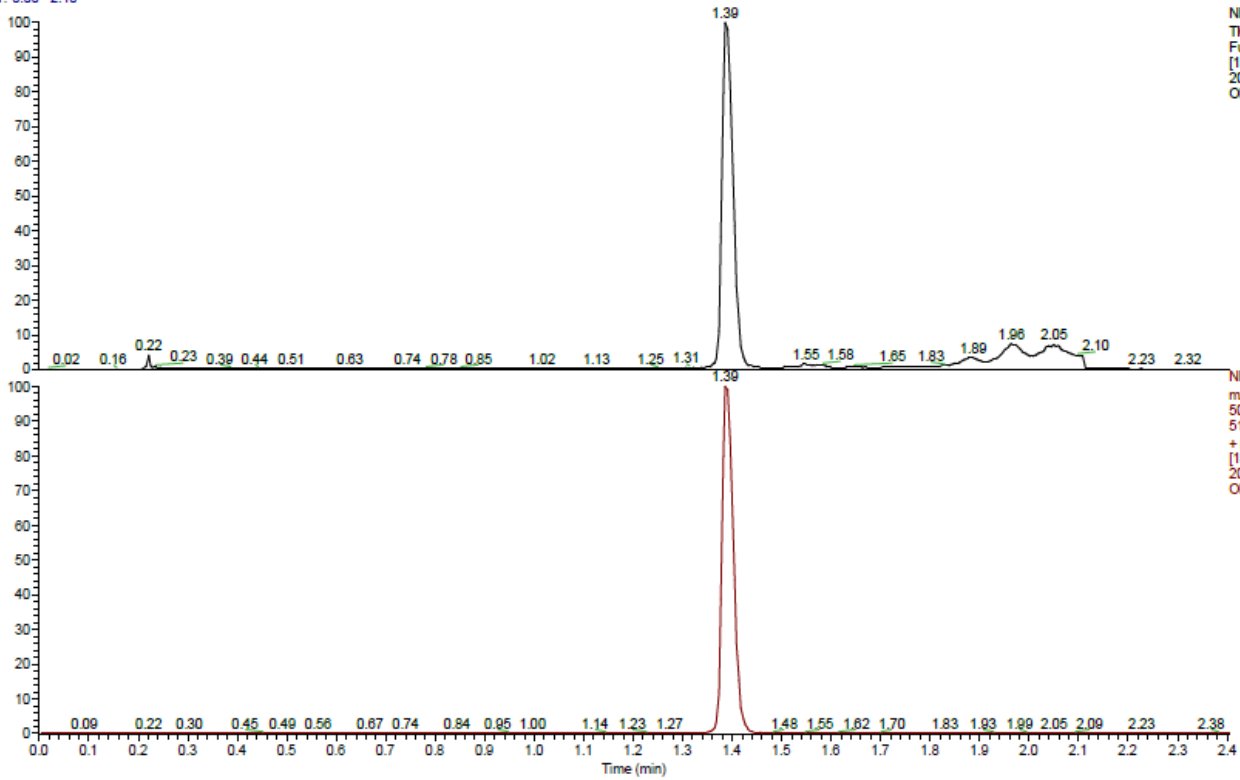

NL: 4.30E9  
TIC F: FTMS + p ESI  
Full ms  
[150.0000-  
2000.0000] MS  
OM-153\_22

NL: 2.29E9  
m/z:  
509.70483-  
510.70483 F: FTMS  
+ p ESI Full ms  
[150.0000-  
2000.0000] MS  
OM-153\_22

OM-153\_22 #298-310 RT: 1.36-1.42 AV: 13 NL: 9.78E8  
T: FTMS + p ESI Full ms [150.0000-2000.0000]

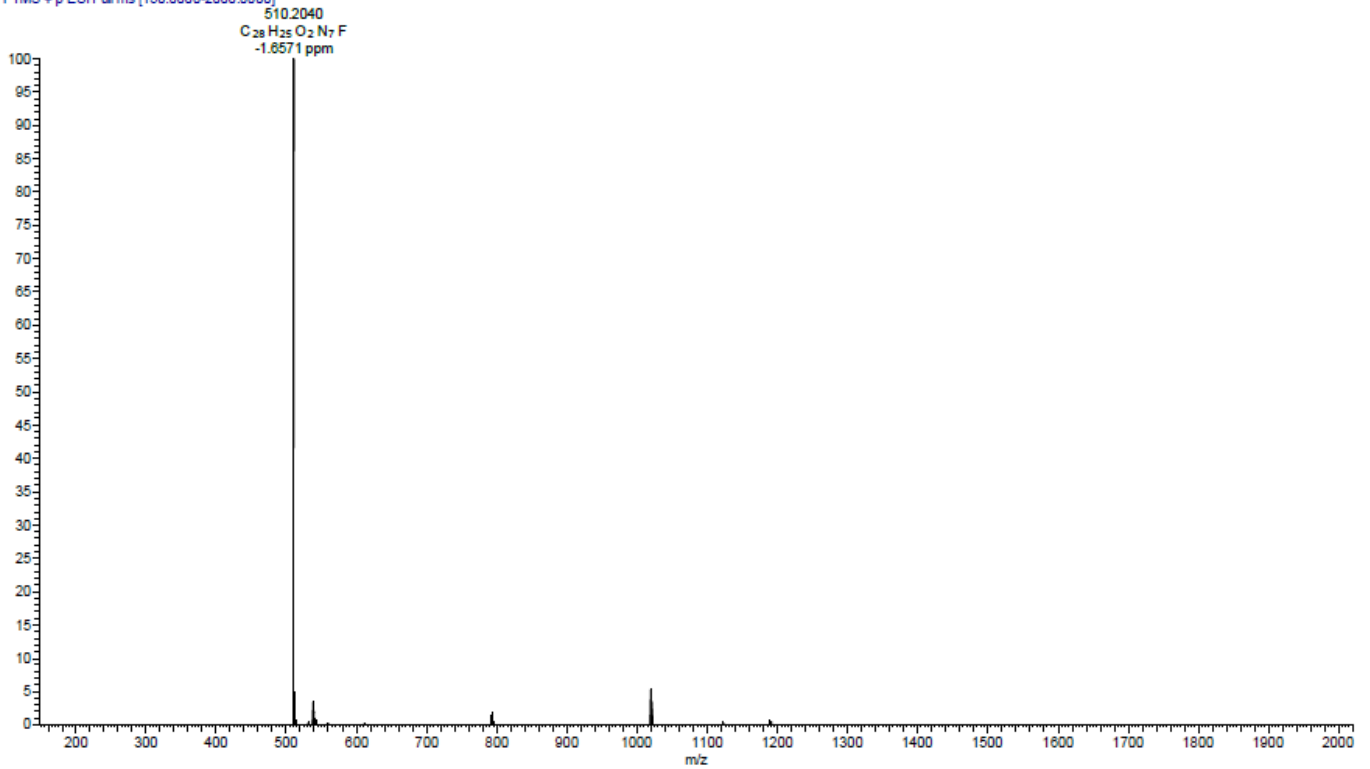



# Compound 25

**title** PINI23-70-1  
**Method** AN\_ACID.M  
**Date acquired** 08-Nov-18, 18:07:46  
**FileName** Analysis\LCMS6\_1108\_105.D  
**Column** XSelect CSH C18 (50x2.1mm, 3.5µ) valve:3  
**Flow** 0.8 ml/min; Column temp: 35°C  
**Eluent A** 0.1% formic acid in acetonitrile  
**Eluent B** 0.1% formic acid in water  
**Gradient** t=0 min 5% A, t=3.5 min 98% A, t=6 min 98% A  
**Posttime** 2 min  
**Detection** DAD(210, 220 and 220-320nm)  
**Detection** PDA(210-320nm)  
**Detection** MSD (ESI pos/neg) mass range: 100 - 1000  
**Detection** ELS gas temp: 40°C, flow 1.5 ml/min, gain 1

DAD A, Sig=270,100 Ref=off Chromatogram

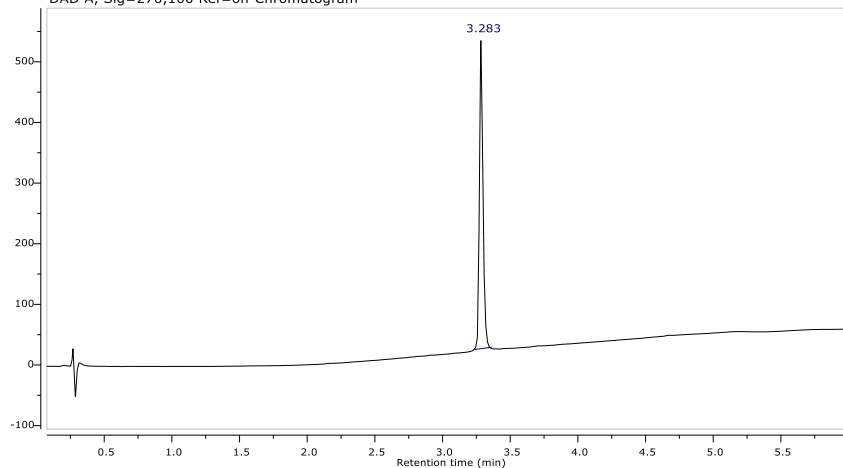

**Integrals spectrum** Chromatogram DAD A, Sig=270,100  
 Ref=off  

| rt (min) | height | area  | area (%) |
|----------|--------|-------|----------|
| 3.28     | 508.1  | 15.54 | 100.00   |

MS + spectrum 3.31..3.40

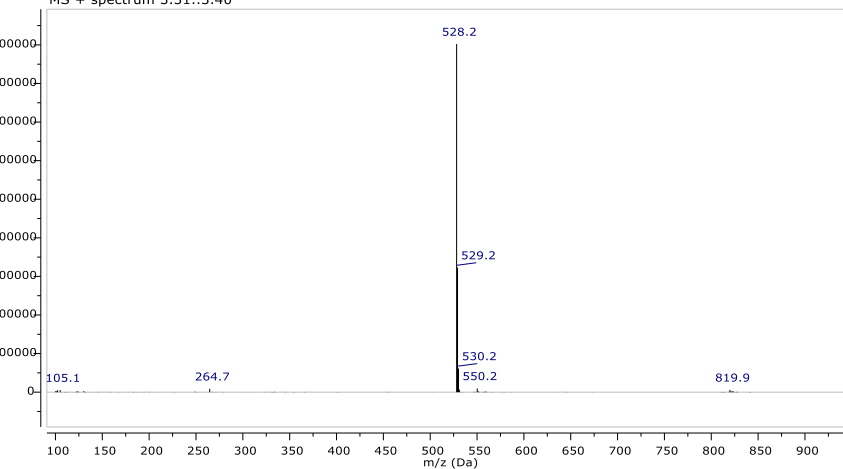

**Title** PINI23-70-1  
**Data File Name** 1109\_250  
**Origin** Bruker BioSpin GmbH  
**Method**  
**Pulse Sequence** zg30  
**Relaxation Delay** 1 s  
**Solvent** CDCl3  
**Acquisition Date** 2018-11-09T13:15:47  
**Temperature** ~ 298.06 K  
**Number of Scans** 64  
**Frequency** 400.232471584084 MHz  
**Nucleus** 1H

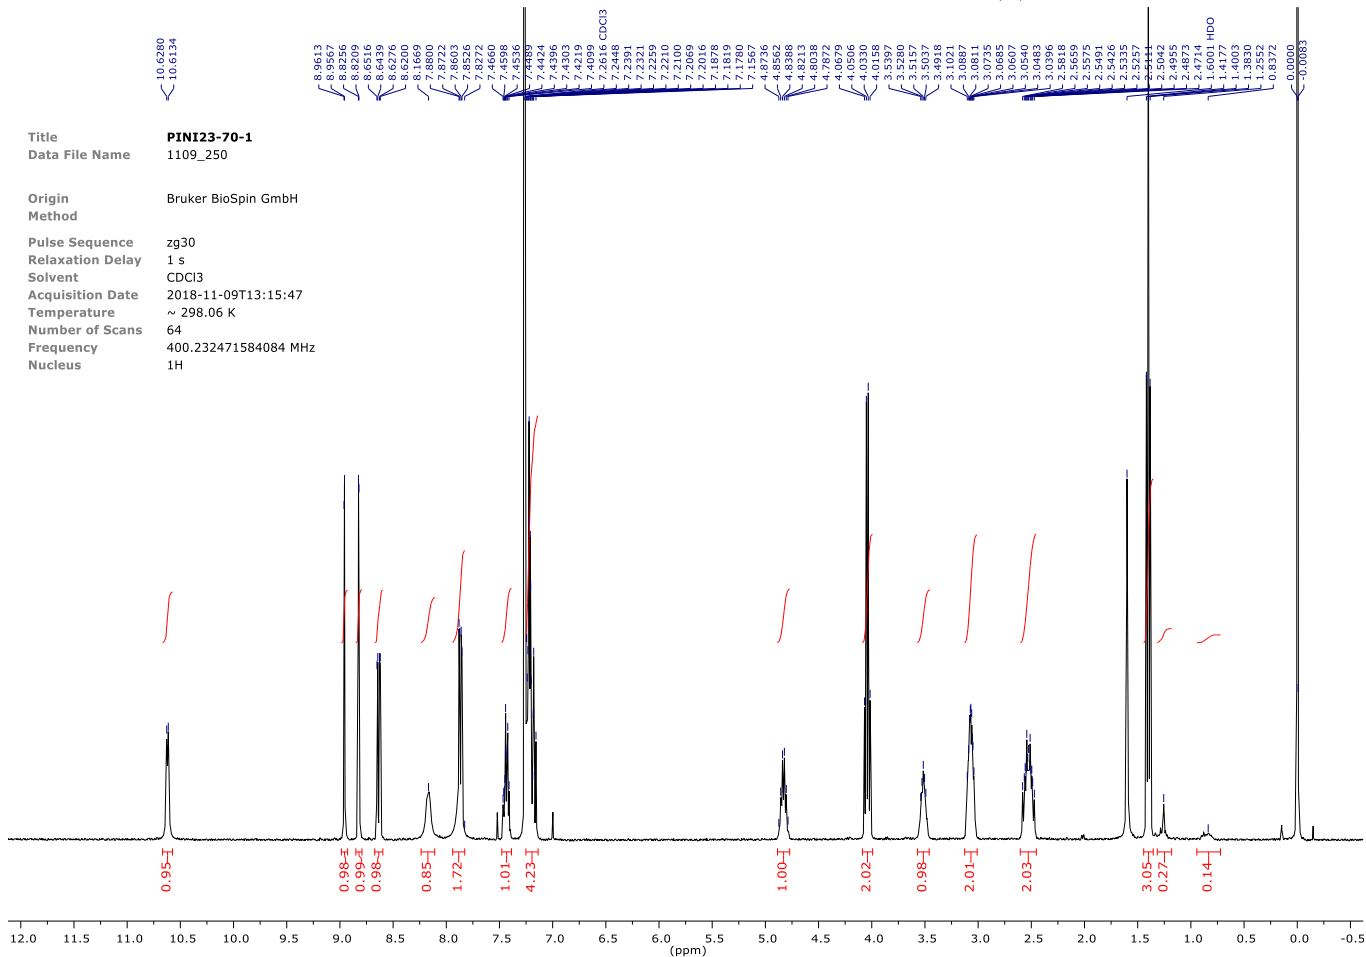

HRMS (m/z): C<sub>28</sub>H<sub>23</sub>N<sub>7</sub>O<sub>2</sub>F<sub>2</sub>, [M+H]<sup>+</sup> Calc: 528.19541; found: 528.1946, Δppm -1.59

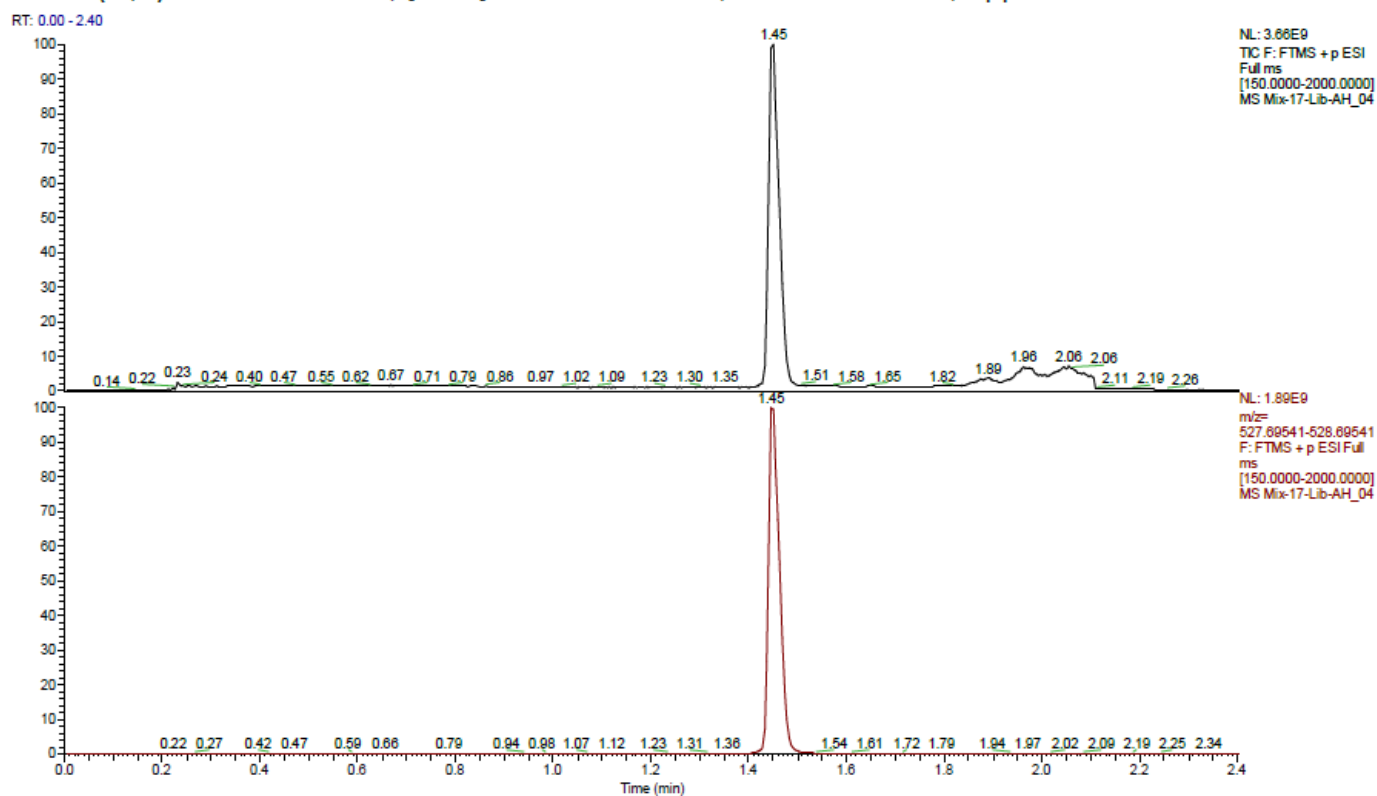

Mix-17-Lib-AH 04 #316-324 RT: 1.44-1.47 AV: 9 NL: 1.08E9  
T: FTMS + p ESI Full ms [150.0000-2000.0000]

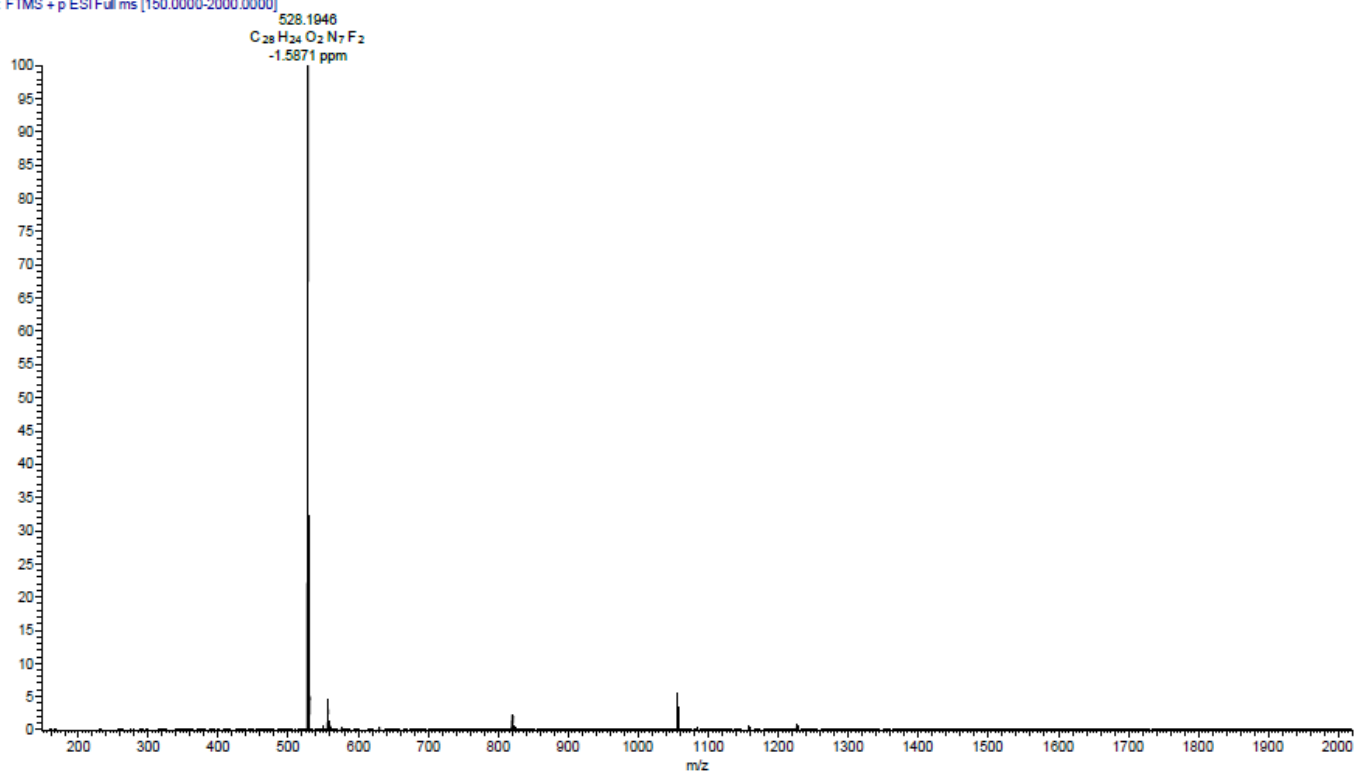

# Compound 26

title **YASM09-025-1**  
 Method AN\_ACID.M  
 Date acquired 26-Apr-21, 10:21:30  
 FileName Analysis\LCMS25\_20210426\_RULE-25-1\_18387.D  
 Acq.method AN\_ACID  
 Column XSelect CSH C18 (50x2.1mm 3.5µ)  
 Flow 0.8 ml/min, Column temp.: 40°C  
 Eluent A 0.1% Formic acid in Water  
 Eluent B 0.1% Formic acid in Acetonitrile  
 Lin. gradient t=0 min 5%B, t=4.5 min 98%B, t=6 min 98% B  
 Postrun 2 min  
 Detection DAD (210, 220 and 220-320 nm)  
 Detection PDA (210-320 nm)  
 Detection MSD (ESI pos/neg) mass range 100-1000  
 Detection ELSD (Neb temp. 50°C, gassflow 1.3 ml/min)

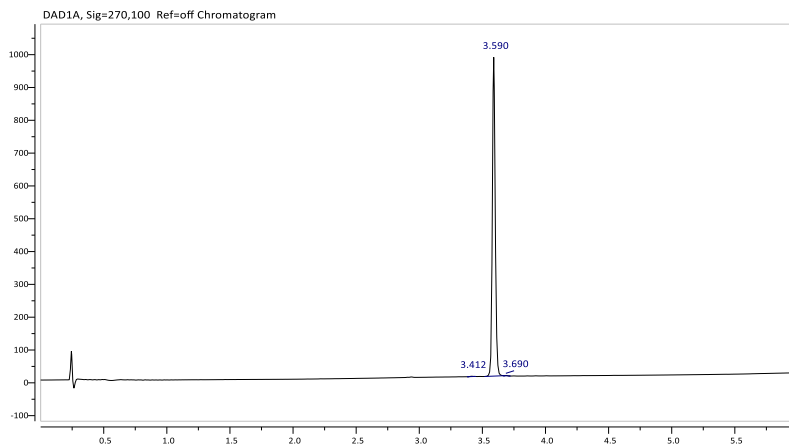

Integrals spectrum Chromatogram DAD1A, Sig=270,100 Ref=off

| rt (min) | height | area  | area (%) |
|----------|--------|-------|----------|
| 3.41     | 1.012  | 30.59 | 0.10     |
| 3.59     | 971.8  | 30925 | 99.81    |
| 3.69     | 1.174  | 29.29 | 0.09     |

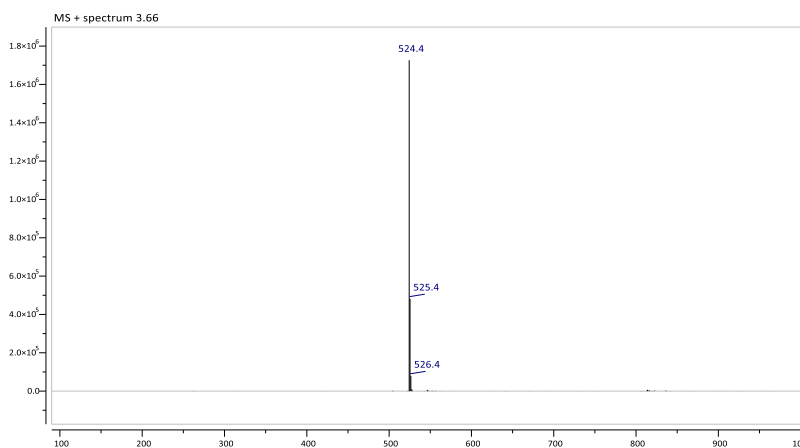

10.4253  
 10.4076  
 6.9790  
 8.4217  
 8.4179  
 8.44033  
 8.3296  
 8.2226  
 8.2057  
 8.2019  
 8.1955  
 8.0455  
 7.9388  
 7.9314  
 7.8745  
 7.8720  
 7.8541  
 7.5948  
 7.5861  
 7.5812  
 7.5670  
 7.5626  
 7.5563  
 7.5470  
 7.5430  
 7.5372  
 7.5333  
 7.5288  
 7.5098  
 7.4950  
 7.4875  
 7.4528  
 7.4379  
 7.4231  
 7.4062  
 7.3994  
 7.38461  
 7.3303  
 7.3076  
 4.7764  
 4.7585  
 4.7218  
 4.1269  
 4.1095  
 4.0745  
 4.0245  
 3.44067  
 3.3833  
 3.3718  
 3.3308 H2O  
 3.3008  
 2.8819  
 2.8726  
 2.8626  
 2.7543  
 2.7003  
 2.6909  
 2.5115 DMSO  
 2.5070 DMSO  
 2.5021 DMSO  
 2.4228 DMSO  
 2.4404  
 2.4173  
 2.3742  
 2.3518  
 2.3063  
 1.3693  
 1.2920  
 1.12337  
 -0.10068

Title **YASM09-025-1**  
 Data File Name NMR\_Feb05-2020\_280  
 Origin Bruker BioSpin GmbH  
 Method 1D  
 Pulse Sequence zg30  
 Relaxation Delay 1 s  
 Solvent DMSO  
 Acquisition Date 2020-02-05T12:48:00  
 Temperature ~ 294.76 K  
 Number of Scans 16  
 Frequency 400.232471584084 MHz  
 Nucleus 1H

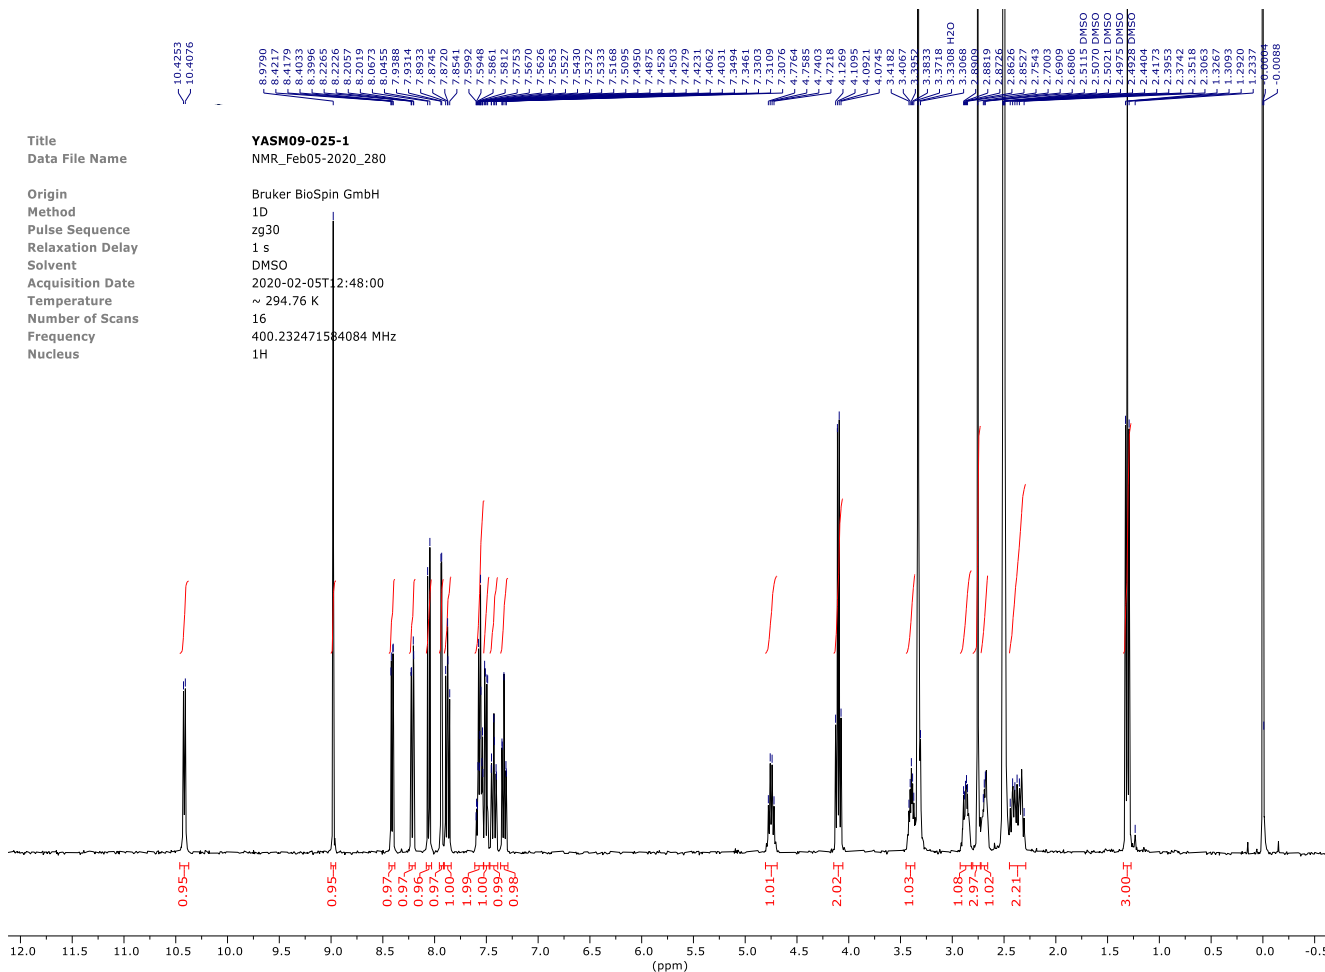

HRMS (m/z): C<sub>29</sub>H<sub>26</sub>N<sub>7</sub>O<sub>2</sub>F, [M+H]<sup>+</sup> Calc: 524.22048; found: 524.2197, Δppm -1.56

RT: 0.00 - 2.40

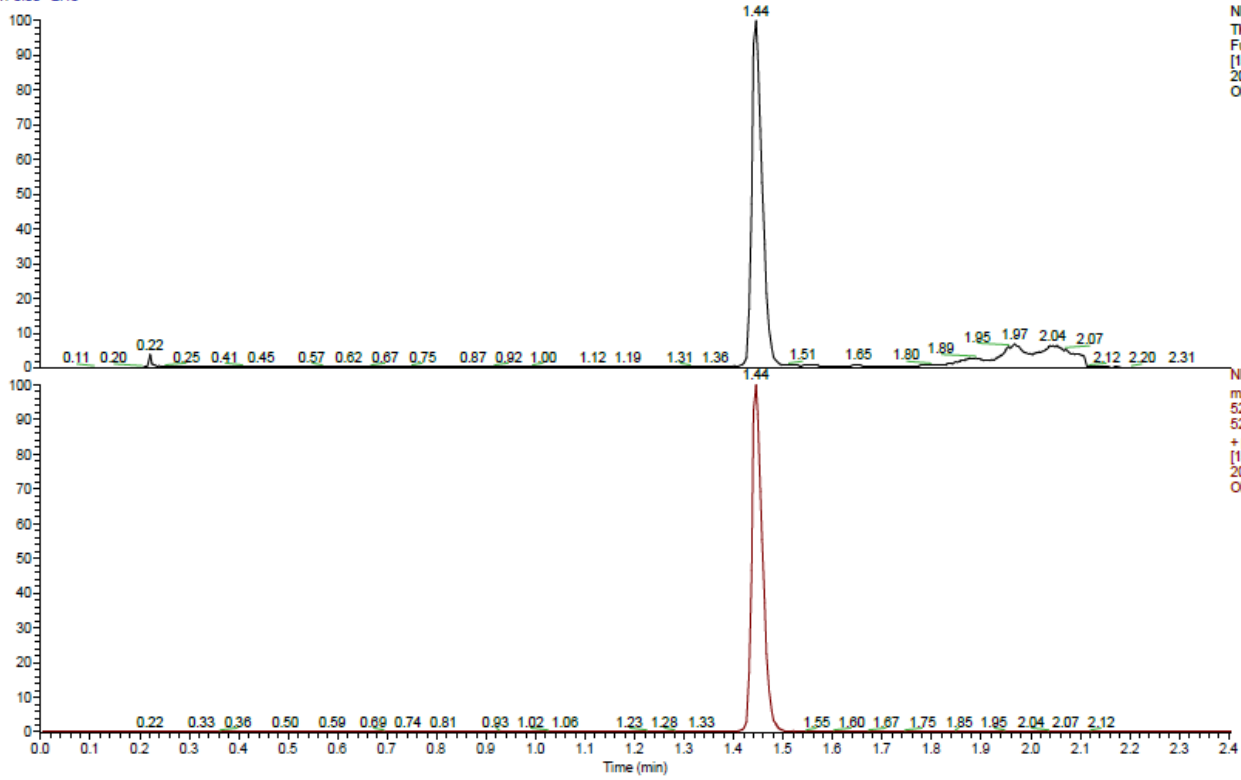

NL: 4.78E9  
TIC F: FTMS + p ESI  
Full ms  
[150.0000-  
2000.0000] MS  
OM-155\_14

NL: 2.56E9  
m/z=  
523.72048-  
524.72048 F: FTMS  
+ p ESI Full ms  
[150.0000-  
2000.0000] MS  
OM-155\_14

OM-155\_14 #309-324 RT: 1.42-1.48 AV: 16 NL: 8.59E8  
T: FTMS + p ESI Full ms [150.0000-2000.0000]

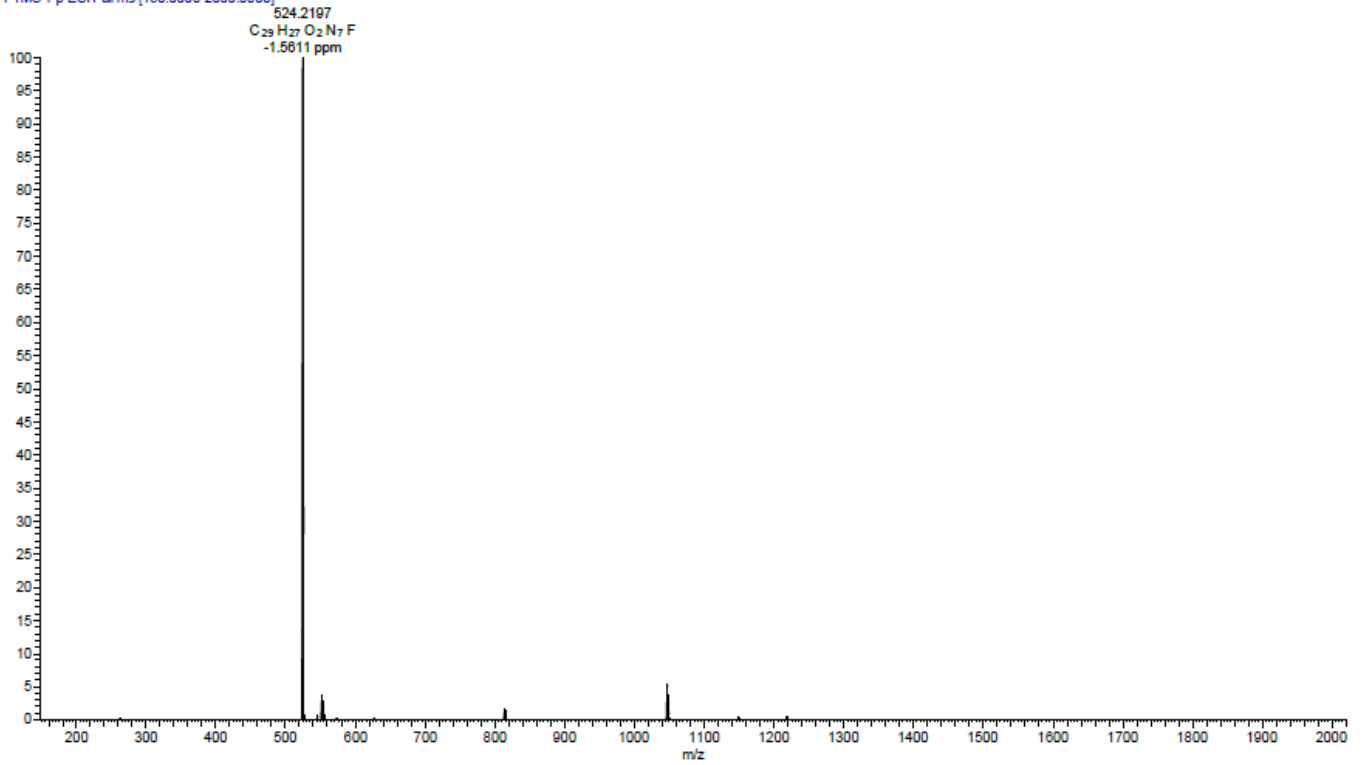

# Compound 27

title **YASM09-026-1**  
 Method AN\_ACID.M  
 Date acquired 26-Apr-21, 10:39:42  
 FileName Analysis\LCMS22\_20210426\_RULE-26-1\_18388.D  
 Acq.method AN\_ACID  
 Column XSelect CSH C18 (50x2.1mm 3.5μ)  
 Flow 0.8 ml/min, Column temp.: 40°C  
 Eluent A 0.1% Formic acid in Water  
 Eluent B 0.1% Formic acid in Acetonitrile  
 Lin. gradient t=0 min 5%B, t=4.5 min 98%B, t=6 min 98% B  
 Postrun 2 min  
 Detection DAD (210, 220 and 220-320 nm)  
 Detection PDA (210-320 nm)  
 Detection MSD (ESI pos/neg) mass range 100-1000  
 Detection ELSA (Neb temp. 50°C, gasflow 1.3 ml/min)

DAD1A, Sig=270,100 Ref=off Chromatogram

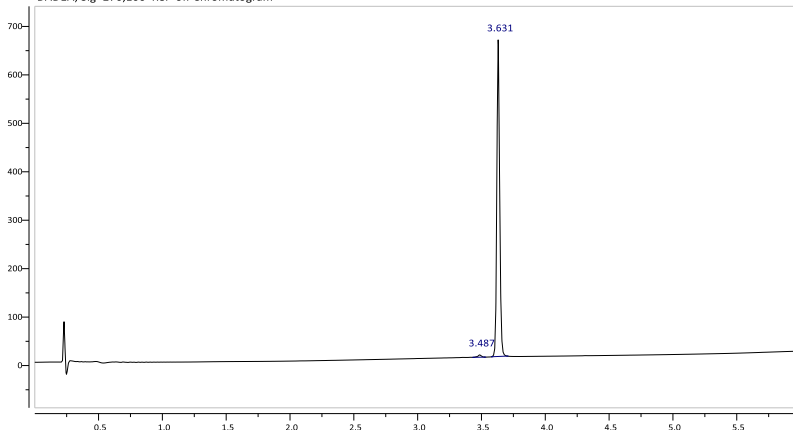

Integrals spectrum Chromatogram DAD1A, Sig=270,100 Ref=off

| rt (min) | height | area  | area (%) |
|----------|--------|-------|----------|
| 3.49     | 4.877  | 185.4 | 0.91     |
| 3.63     | 653.7  | 20143 | 99.09    |

MS + spectrum 3.70

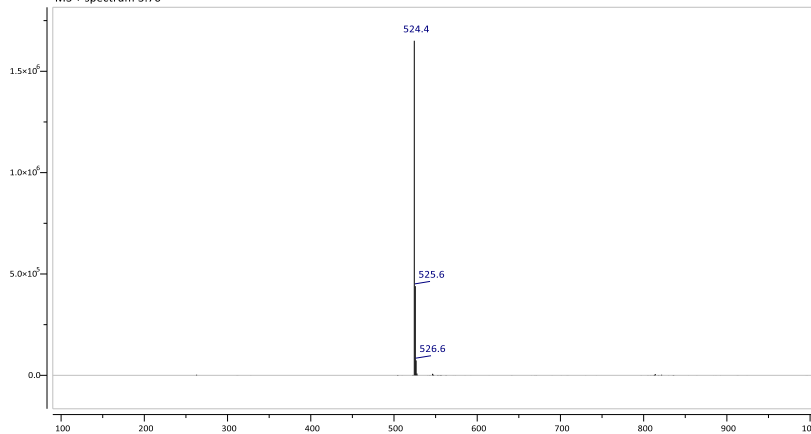

Title **YASM09-026-1**  
 Data File Name NMR\_Feb10-2020\_270  
 Origin Bruker BioSpin GmbH  
 Method 1D  
 Pulse Sequence zg30  
 Relaxation Delay 1 s  
 Solvent DMSO  
 Acquisition Date 2020-02-10T12:54:00  
 Temperature ~ 294.76 K  
 Number of Scans 16  
 Frequency 400.232471584084 MHz  
 Nucleus 1H

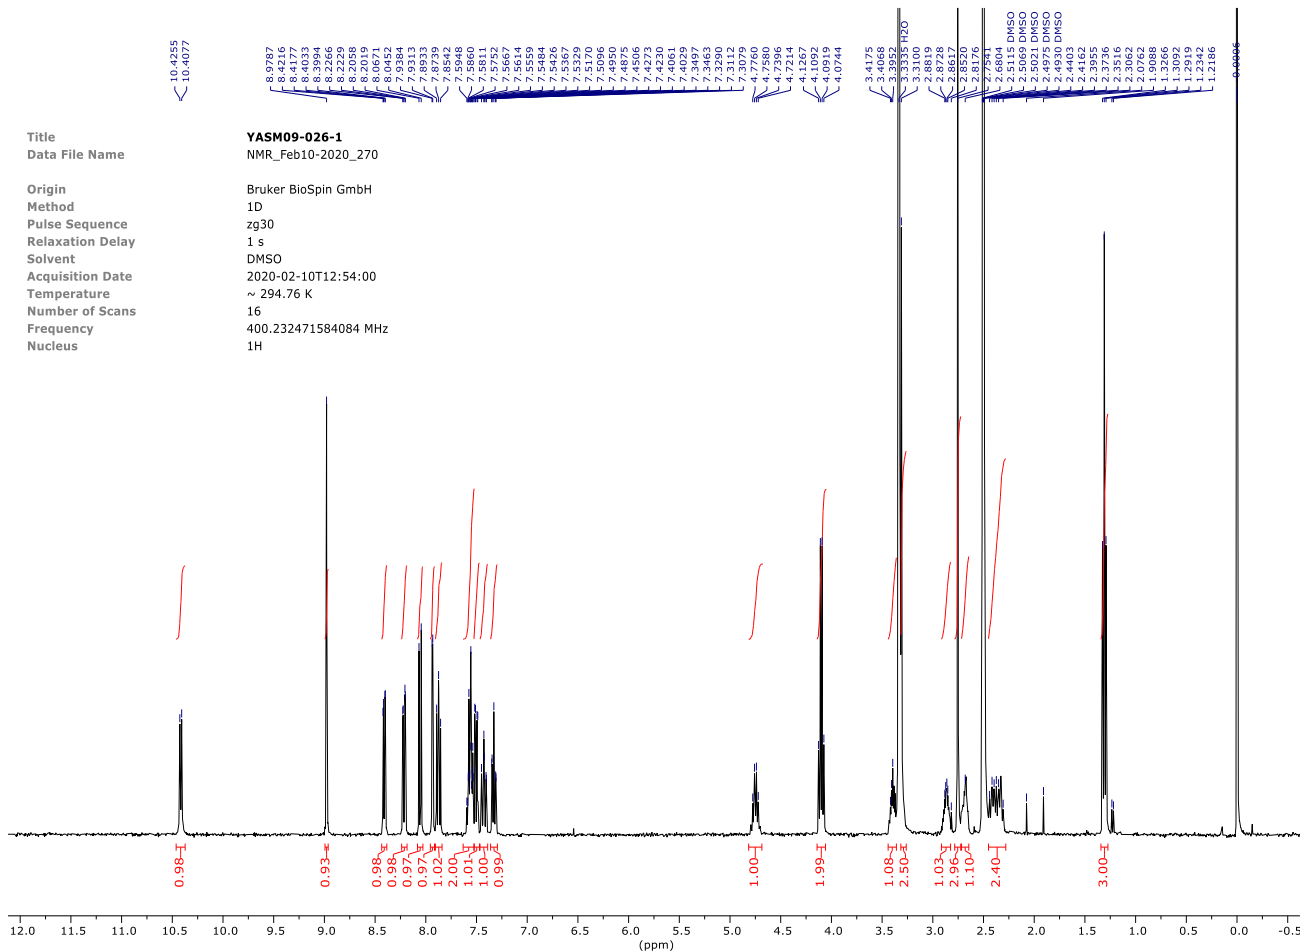

HRMS (m/z): C<sub>29</sub>H<sub>26</sub>N<sub>7</sub>O<sub>2</sub>F, [M+H]<sup>+</sup> Calc: 524.22048; found: 524.2198, Δppm -1.36

RT: 0.00 - 2.40

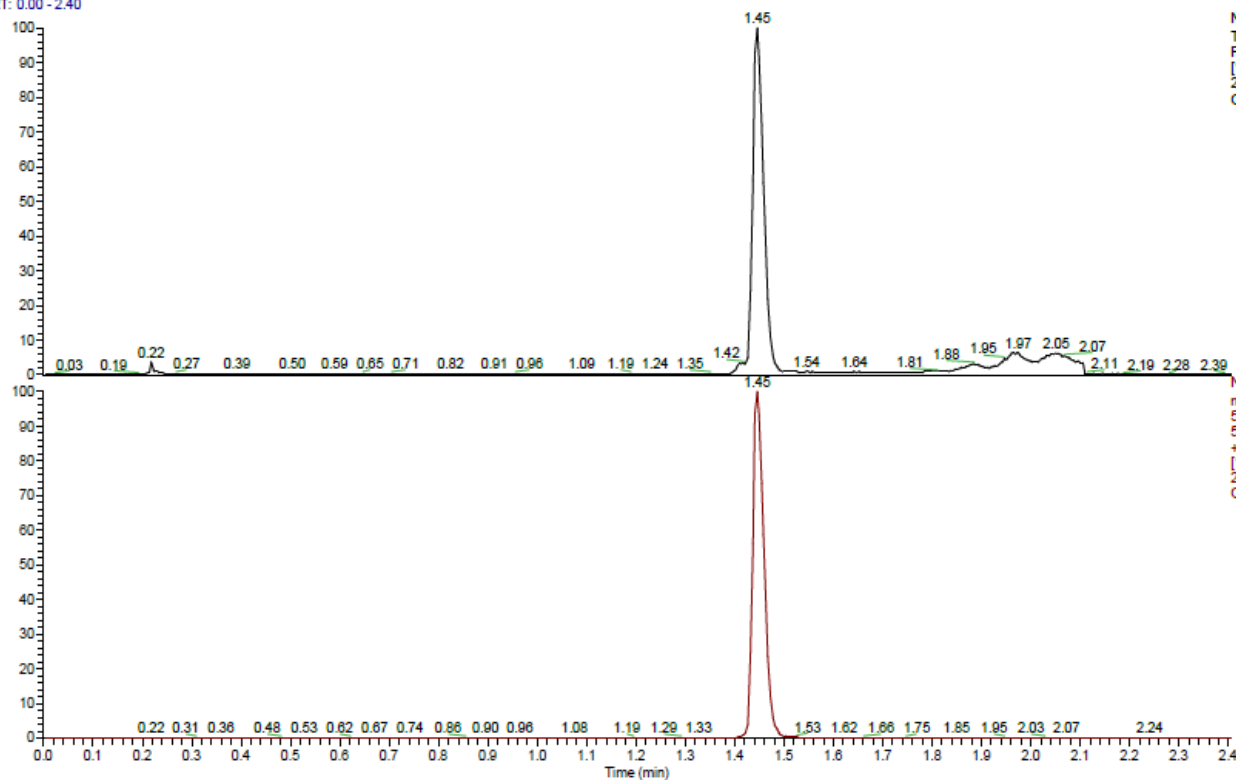

NL: 4.91E9  
TIC F: FTMS + p ESI  
Full ms  
[150.0000-  
2000.0000] MS  
OM-156\_20

NL: 2.58E9  
m/z=  
523.72048-  
524.72048 F: FTMS  
+ p ESI Full ms  
[150.0000-  
2000.0000] MS  
OM-156\_20

OM-156\_20 #312-326 RT: 1.42-1.48 AV: 15 NL: 9.54E8  
T: FTMS + p ESI Full ms [150.0000-2000.0000]

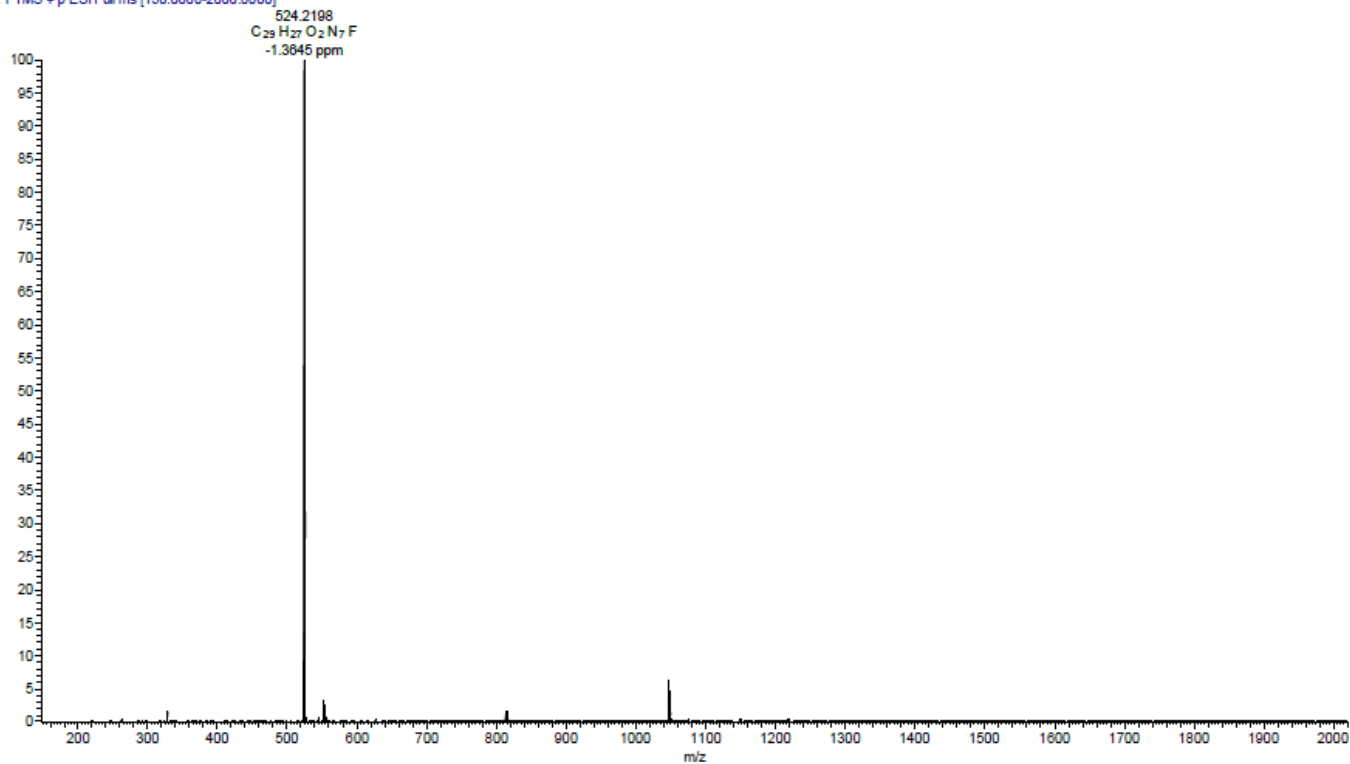

# Compound 28

title **RYASM09-002-3**  
 Method AN\_ACID.M  
 Date acquired 26-Apr-21, 10:07:50  
 FileName Analysis\LCMS22\_20210426\_RULE-2-3\_18386.D  
 Acq.method AN\_ACID  
 Column XSelect CSH C18 (50x2.1mm 3.5µ)  
 Flow 0.8 ml/min, Column temp.: 40°C  
 Eluent A 0.1% Formic acid in Water  
 Eluent B 0.1% Formic acid in Acetonitrile  
 Lin. gradient t=0 min 5%B, t=4.5 min 98%B, t=6 min 98% B  
 Postrun 2 min  
 Detection DAD (210, 220 and 220-320 nm)  
 Detection PDA (210-320 nm)  
 Detection MSD (ESI pos/neg) mass range 100-1000  
 Detection ELSD (Neb temp. 50°C, gasflow 1.3 ml/min)

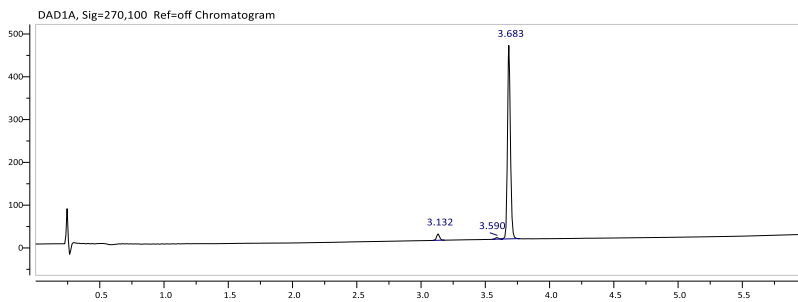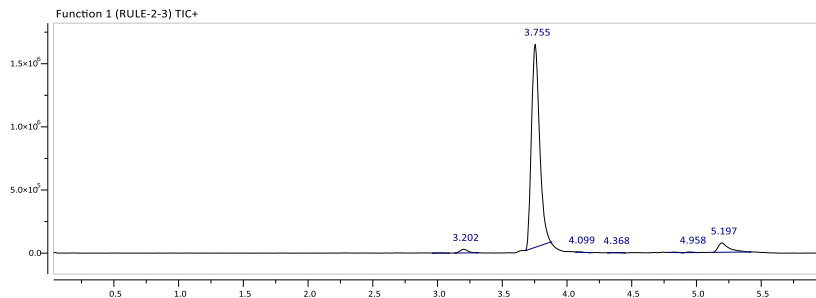

Integrals spectrum Chromatogram DAD1A, Sig=270,100 Ref=off

| rt (min) | height | area  | area (%) |
|----------|--------|-------|----------|
| 3.13     | 14.86  | 479.2 | 3.22     |
| 3.59     | 3.818  | 129.8 | 0.87     |
| 3.68     | 452.3  | 14258 | 95.90    |

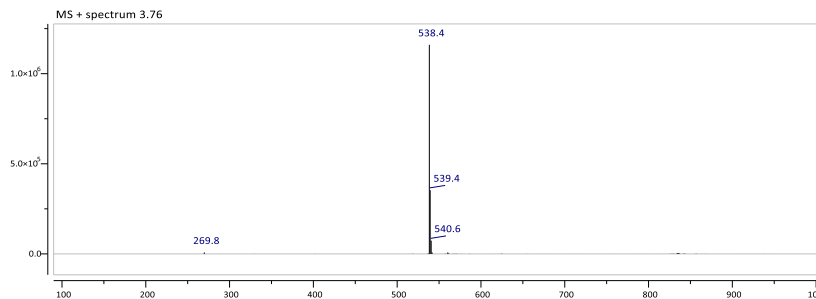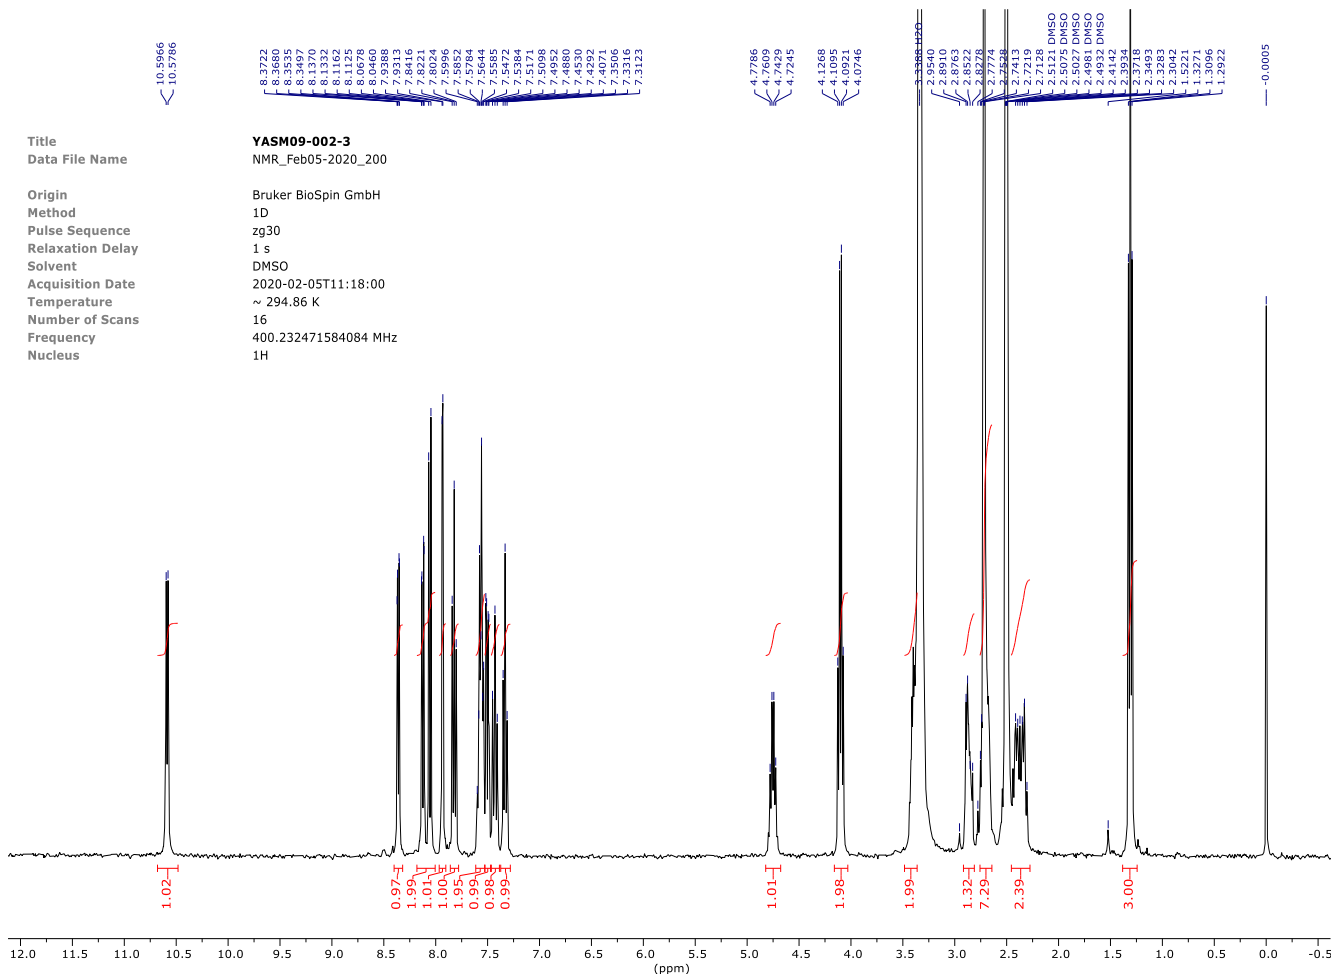

HRMS (m/z): C<sub>30</sub>H<sub>28</sub>N<sub>7</sub>O<sub>2</sub>F, [M+H]<sup>+</sup> Calc: 538.23613; found: 538.2349, Δppm -2.27

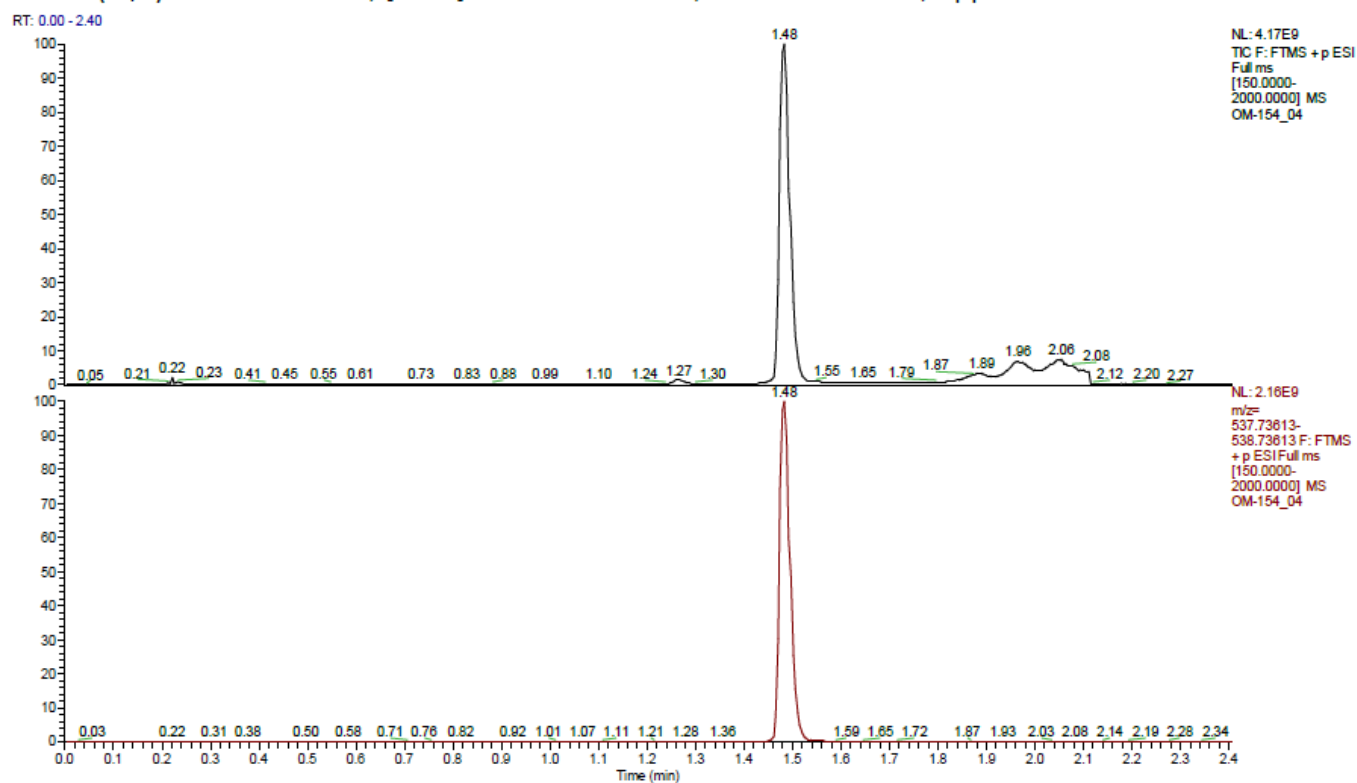

OM-154\_04 #321-331 RT: 1.47-1.51 AV: 11 NL: 1.03E9  
T: FTMS + p ESI Full ms [150.0000-2000.0000]

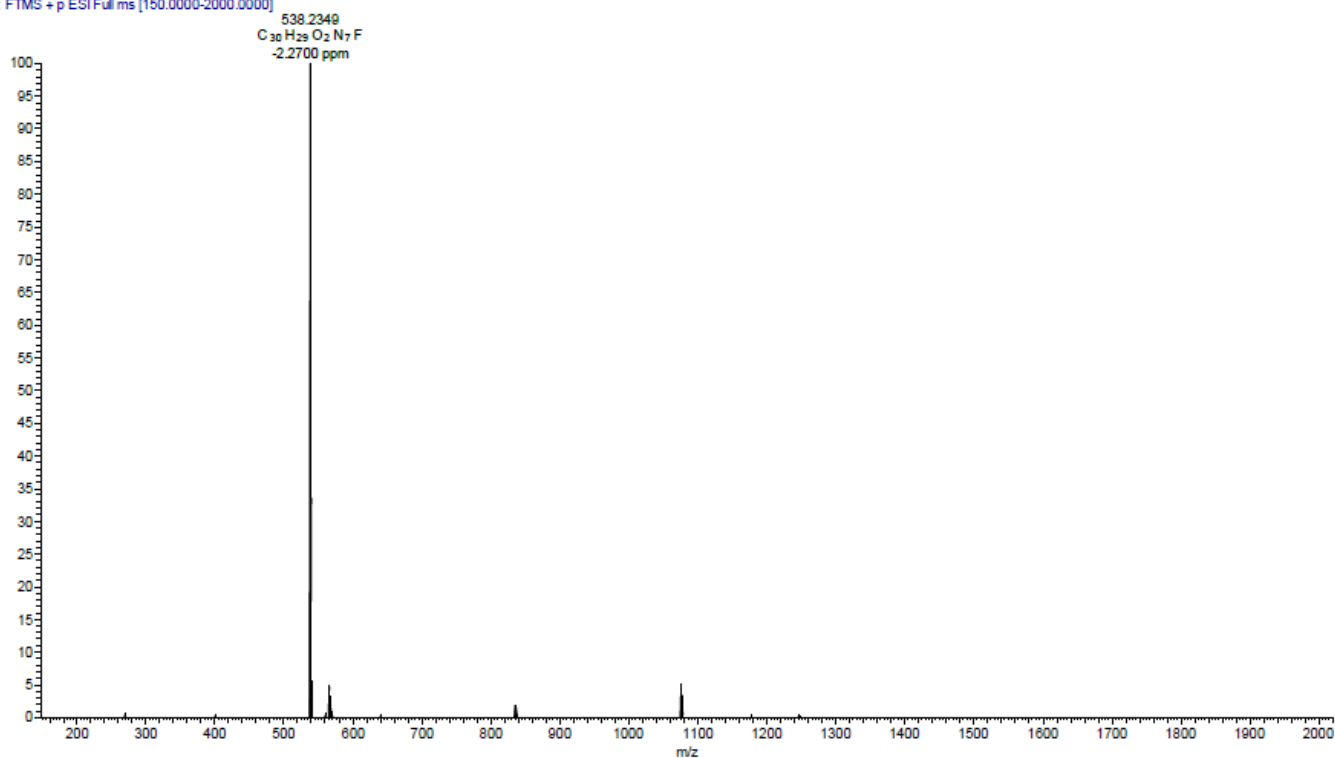



# Compound 29a

**title** PINI23-66-1  
**Method** AN\_ACID.M  
**Date acquired** 30-Oct-18, 16:45:50  
**FileName** Analysis\LCMS6\_1030\_092.D  
**Column** XSelect CSH C18 (50x2.1mm, 3.5μ) valve:3  
**Flow** 0.8 ml/min; Column temp: 35°C  
**Eluent A** 0.1% formic acid in acetonitrile  
**Eluent B** 0.1% formic acid in water  
**Gradient** t=0 min 5% A, t=3.5 min 98% A, t=6 min 98%A  
**Posttime** 2 min  
**Detection** DAD(210, 220 and 220-320nm)  
**Detection** PDA(210-320nm)  
**Detection** MSD (ESI pos/neg) mass range: 100 - 1000  
**Detection** ELSD gas temp: 40°C, flow 1.5 ml/min, gain 1

DAD A, Sig=270,100 Ref=off Chromatogram

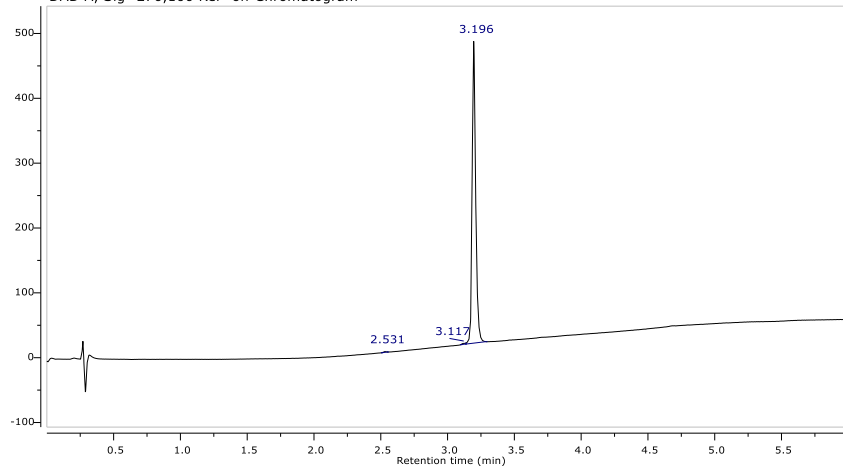

Integrals spectrum Chromatogram DAD A, Sig=270,100 Ref=off

| rt (min) | height | area    | area (%) |
|----------|--------|---------|----------|
| 2.53     | 1.176  | 0.02484 | 0.17     |
| 3.12     | 1.485  | 0.04052 | 0.28     |
| 3.20     | 465.6  | 14.27   | 99.54    |

MS + spectrum 3.23..3.32

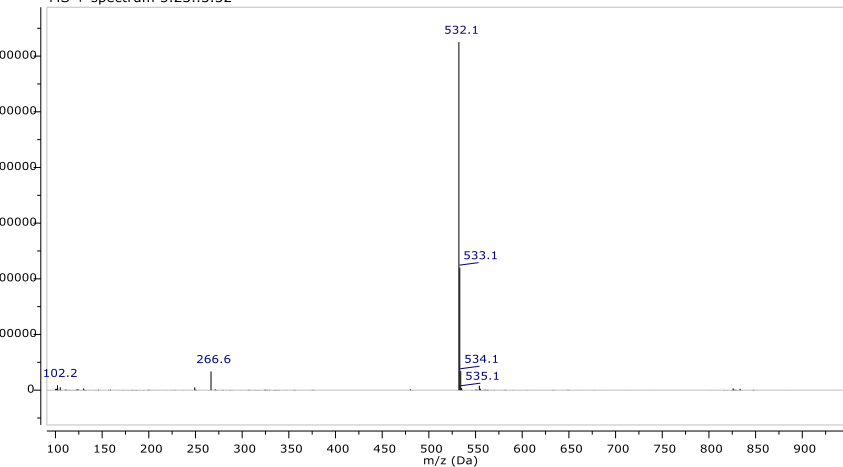

10.6824  
 10.6676  
 8.9682  
 8.9638  
 8.9594  
 8.9665  
 8.8582  
 8.8538  
 8.8501  
 8.83206  
 8.2751  
 8.2713  
 8.2583  
 8.0748  
 8.0679  
 7.9264  
 7.9264  
 7.9035  
 7.8850  
 7.9598  
 7.9598  
 7.9379  
 7.9310  
 7.4926  
 7.4837  
 7.4720  
 7.4680  
 7.4646  
 7.4488  
 7.4445  
 7.4362  
 7.2619  
 7.2389  
 7.2335  
 7.2283  
 7.2090  
 7.1990  
 7.1768  
 6.7014  
 6.3393  
 4.8884  
 4.8729  
 4.8672  
 4.8607  
 4.8559  
 4.8521  
 4.8401  
 4.8321  
 4.8248  
 4.8205  
 4.8154  
 4.8030  
 3.9516  
 3.5470  
 3.5358  
 3.5223  
 3.5223  
 3.5113  
 3.5013  
 3.4883  
 3.4883  
 3.1232  
 3.1091  
 3.1007  
 3.0878  
 3.0878  
 3.0784  
 3.0714  
 3.0552  
 3.0552  
 3.0430  
 2.6071  
 2.5911  
 2.5775  
 2.5669  
 2.5583  
 2.5402  
 2.5368  
 2.5368  
 2.5278  
 2.5213  
 2.5143  
 2.5033  
 2.4875  
 2.0073  
 1.3464  
 1.3464  
 -0.0000

**Title** PINI23-66-1  
**Data File Name** 1031\_120  
**Origin** Bruker BioSpin GmbH  
**Method**  
**Pulse Sequence** zg30  
**Relaxation Delay** 1 s  
**Solvent** CDCl3  
**Acquisition Date** 2018-10-31T09:56:02  
**Temperature** ~ 298.06 K  
**Number of Scans** 32  
**Frequency** 400.232471584084 MHz  
**Nucleus** 1H

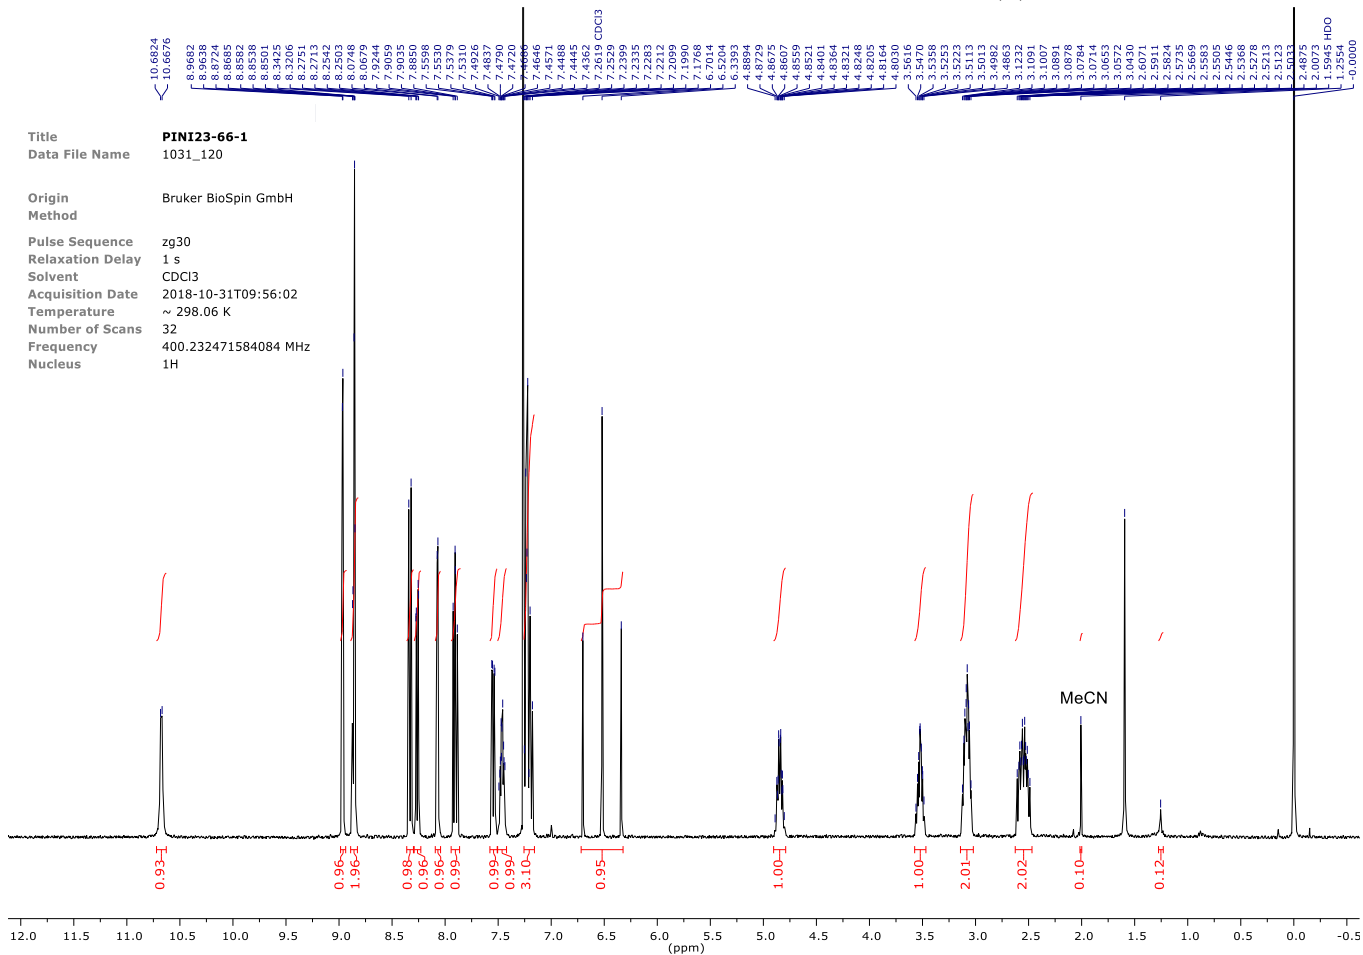

HRMS (m/z): C<sub>27</sub>H<sub>20</sub>N<sub>7</sub>O<sub>2</sub>F<sub>3</sub>, [M+H]<sup>+</sup> Calc: 532.17033; found 532.1692, Δppm -2.12

RT: 0.00 - 2.40

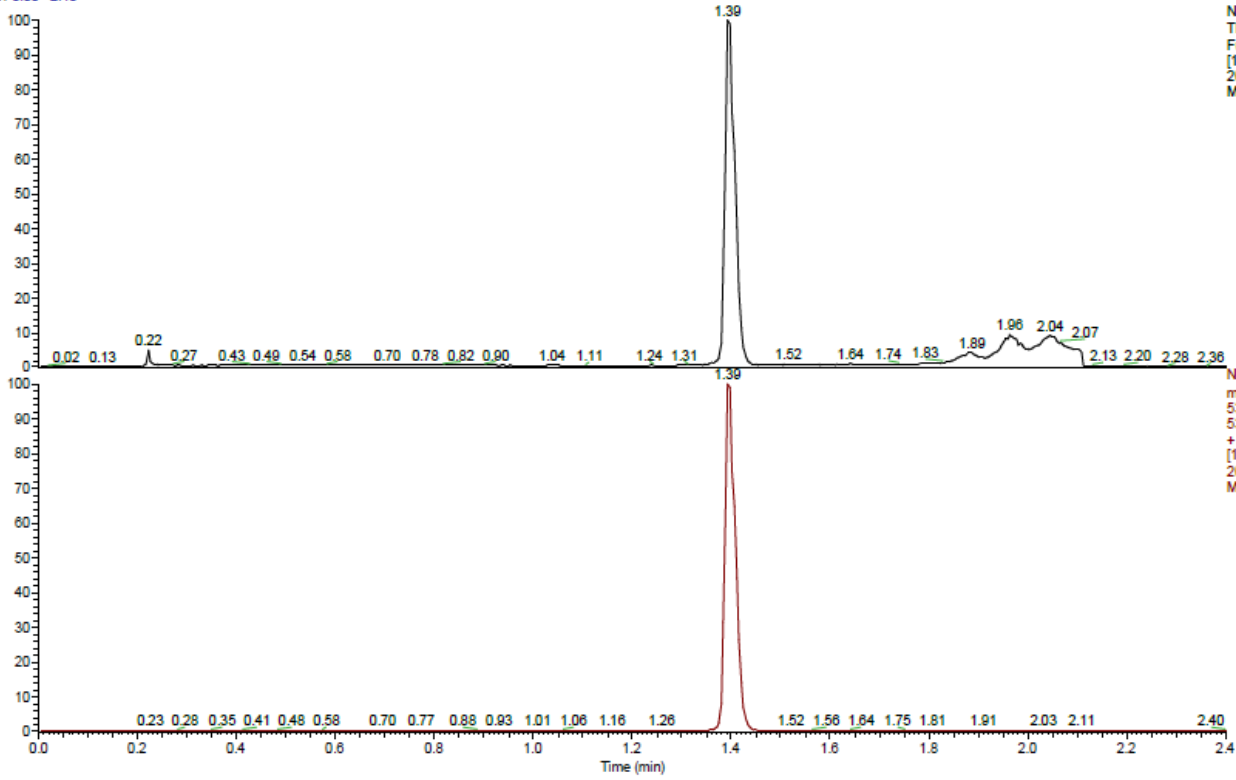

NL: 3.53E9  
TIC F: FTMS + p ESI  
Full ms  
[150.0000-  
2000.0000] MS  
Mix-87F\_10

NL: 1.82E9  
m/z=  
531.67033-  
532.67033 F: FTMS  
+ p ESI Full ms  
[150.0000-  
2000.0000] MS  
Mix-87F\_10

Mix-87F\_10 #303-312 RT: 1.38-1.42 AV: 10 NL: 9.03E8  
T: FTMS + p ESI Full ms [150.0000-2000.0000]

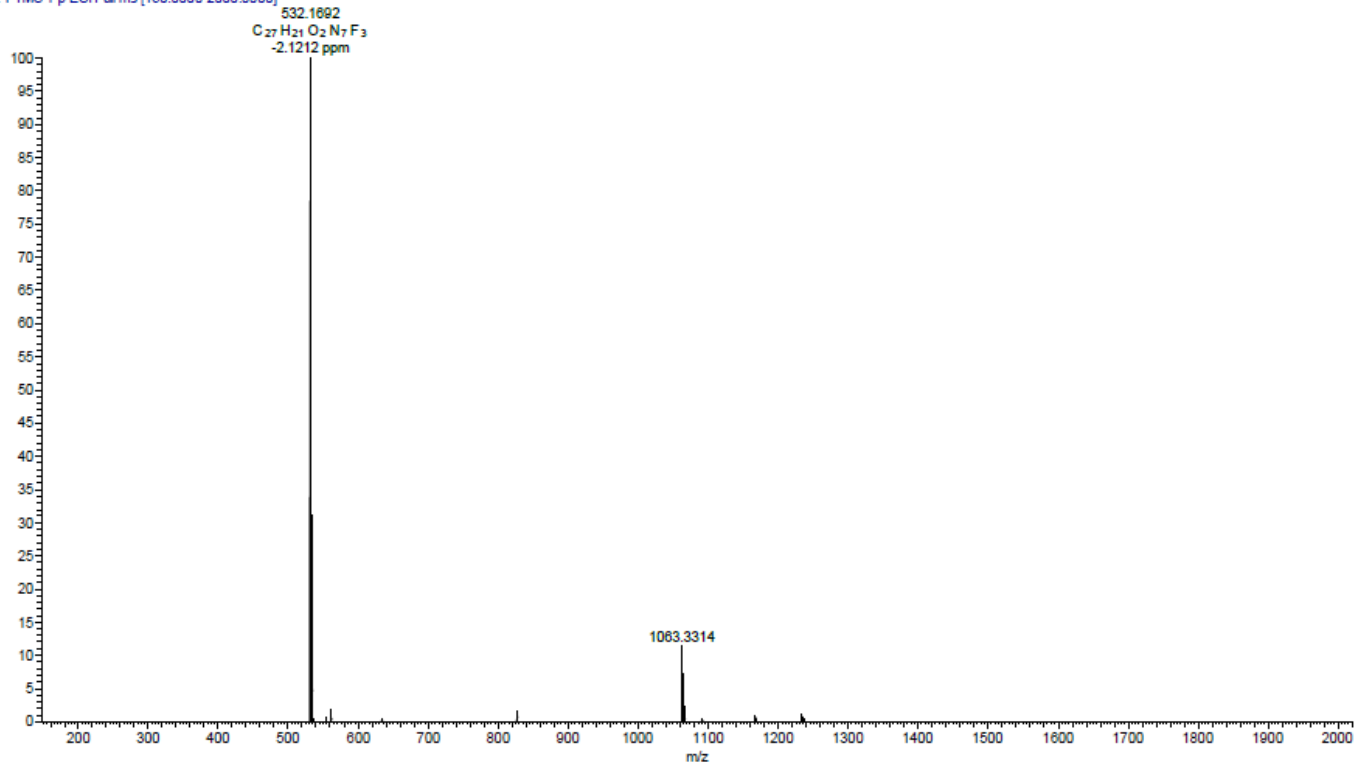

# Compound 29b

**title** PINI23-69-1  
**Method** AN\_ACID.M  
**Date acquired** 01-Nov-18, 17:02:08  
**FileName** Analysis\LCMS6\_1101\_131.D  
**Column** XSelect CSH C18 (50x2.1mm, 3.5µ) valve:3  
**Flow** 0.8 ml/min; Column temp: 35°C  
**Eluent A** 0.1% formic acid in acetonitrile  
**Eluent B** 0.1% formic acid in water  
**Gradient** t=0 min 5% A, t=3.5 min 98% A, t=6 min 98% A  
**Posttime** 2 min  
**Detection** DAD(210, 220 and 220-320nm)  
**Detection** PDA(210-320nm)  
**Detection** MSD (ESI pos/neg) mass range: 100 - 1000  
**Detection** ELSD gas temp: 40°C, flow 1.5 ml/min, gain 1

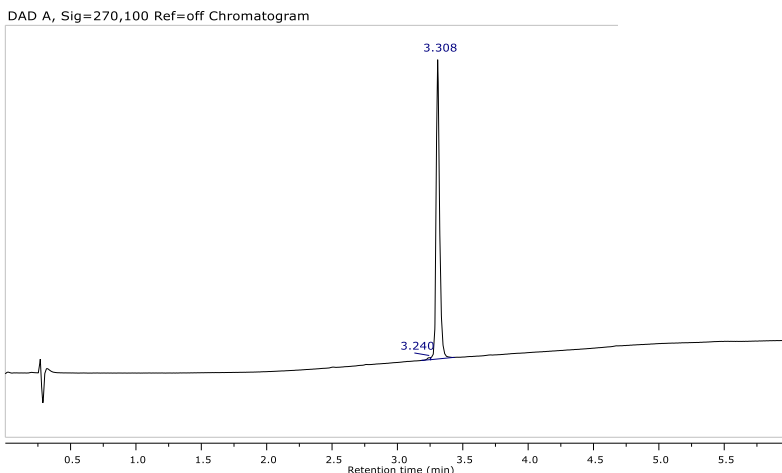

Integrals spectrum Chromatogram DAD A, Sig=270,100 Ref=off

| rt (min) | height | area   | area (%) |
|----------|--------|--------|----------|
| 3.24     | 3.732  | 0.1076 | 0.62     |
| 3.31     | 563.8  | 17.13  | 99.38    |

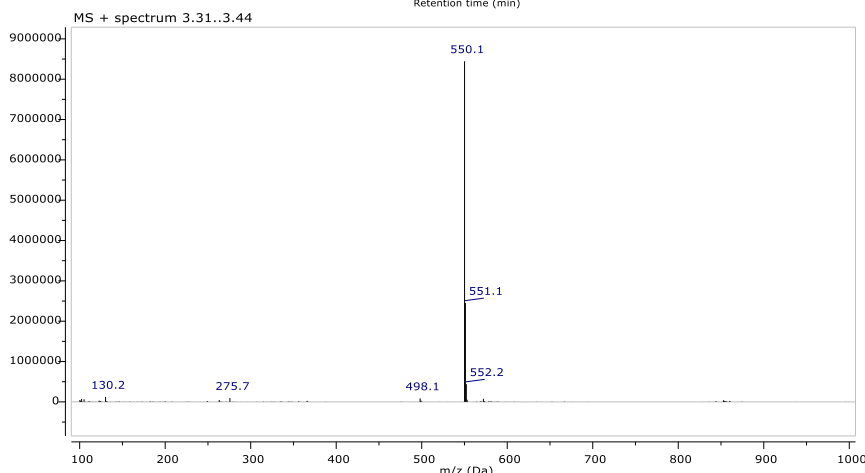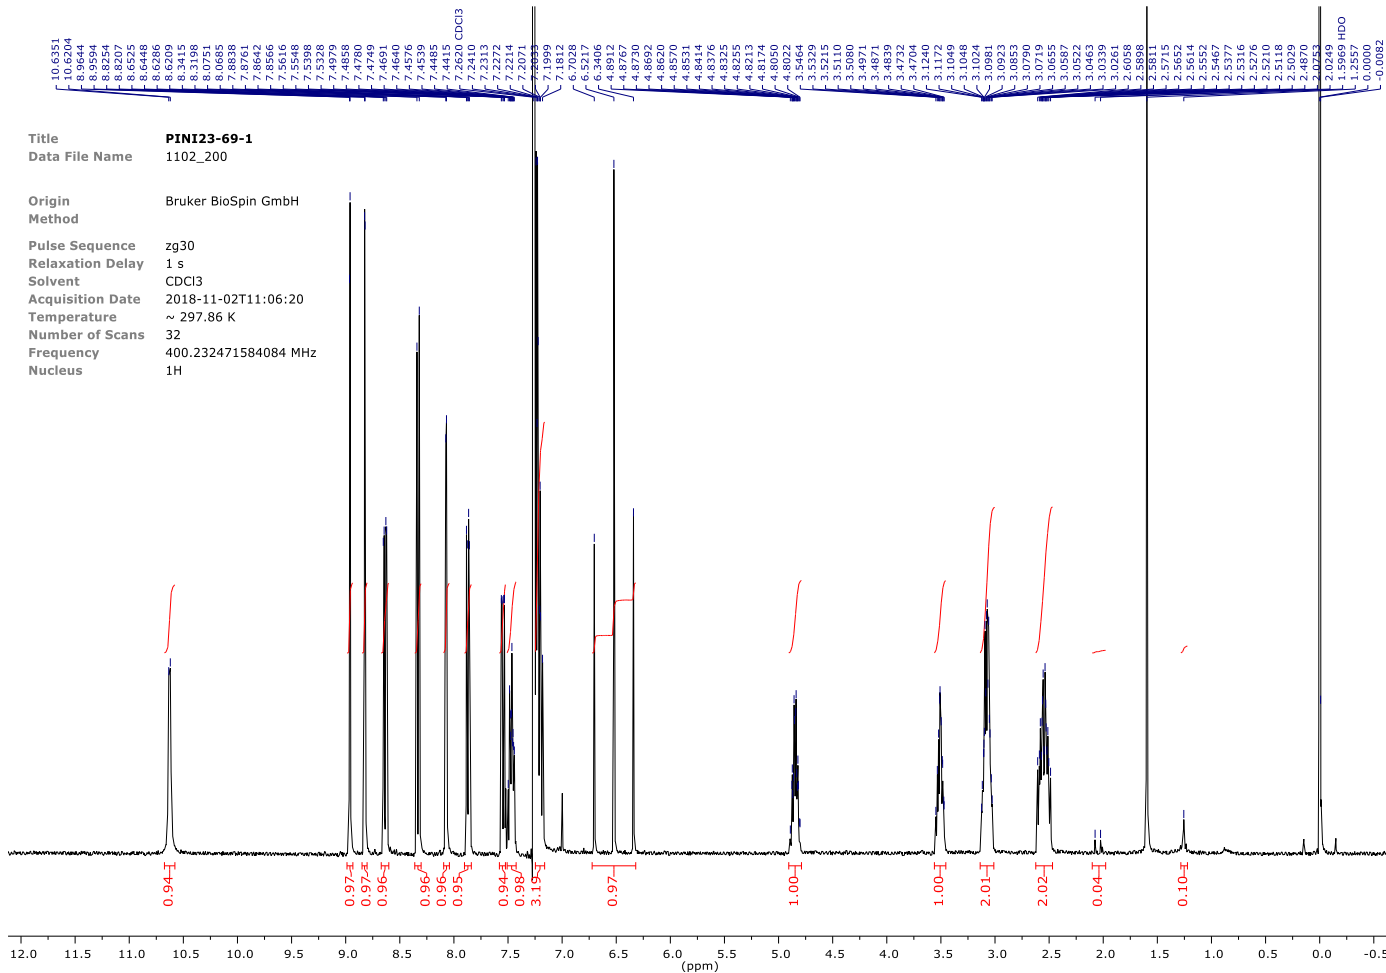

HRMS (m/z): C<sub>27</sub>H<sub>19</sub>N<sub>7</sub>O<sub>2</sub>F<sub>4</sub>, [M+H]<sup>+</sup> Calc: 550.16091; found: 550.1597, Δppm -2.25

RT: 0.00 - 2.40

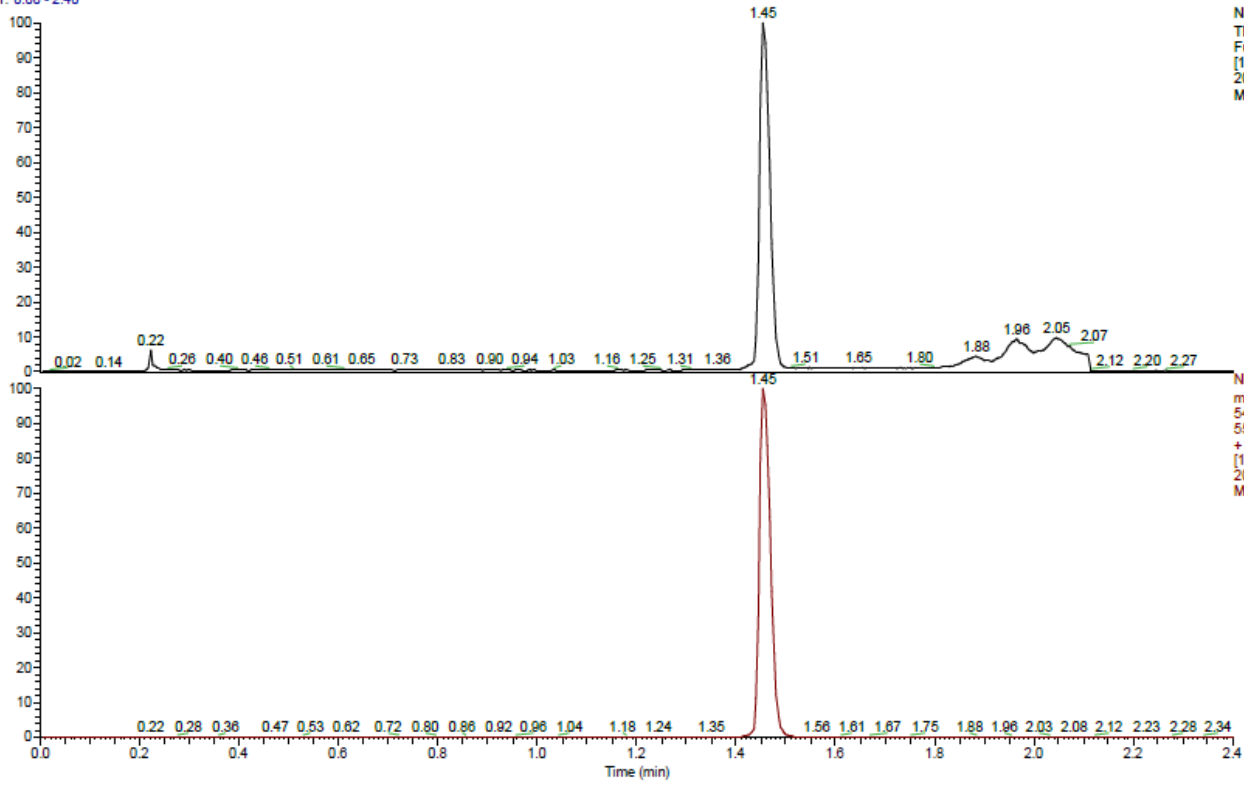

NL: 3.13E9  
TIC F: FTMS + p ESI  
Full ms  
[150.0000-  
2000.0000] MS  
Mix-87G\_04

NL: 1.55E9  
m/z=  
549.66091-  
550.66091 F: FTMS  
+ p ESI Full ms  
[150.0000-  
2000.0000] MS  
Mix-87G\_04

Mix-87G\_04 #314-323 RT: 1.44-1.48 AV: 10 NL: 7.86E8  
T: FTMS + p ESI Full ms [150.0000-2000.0000]

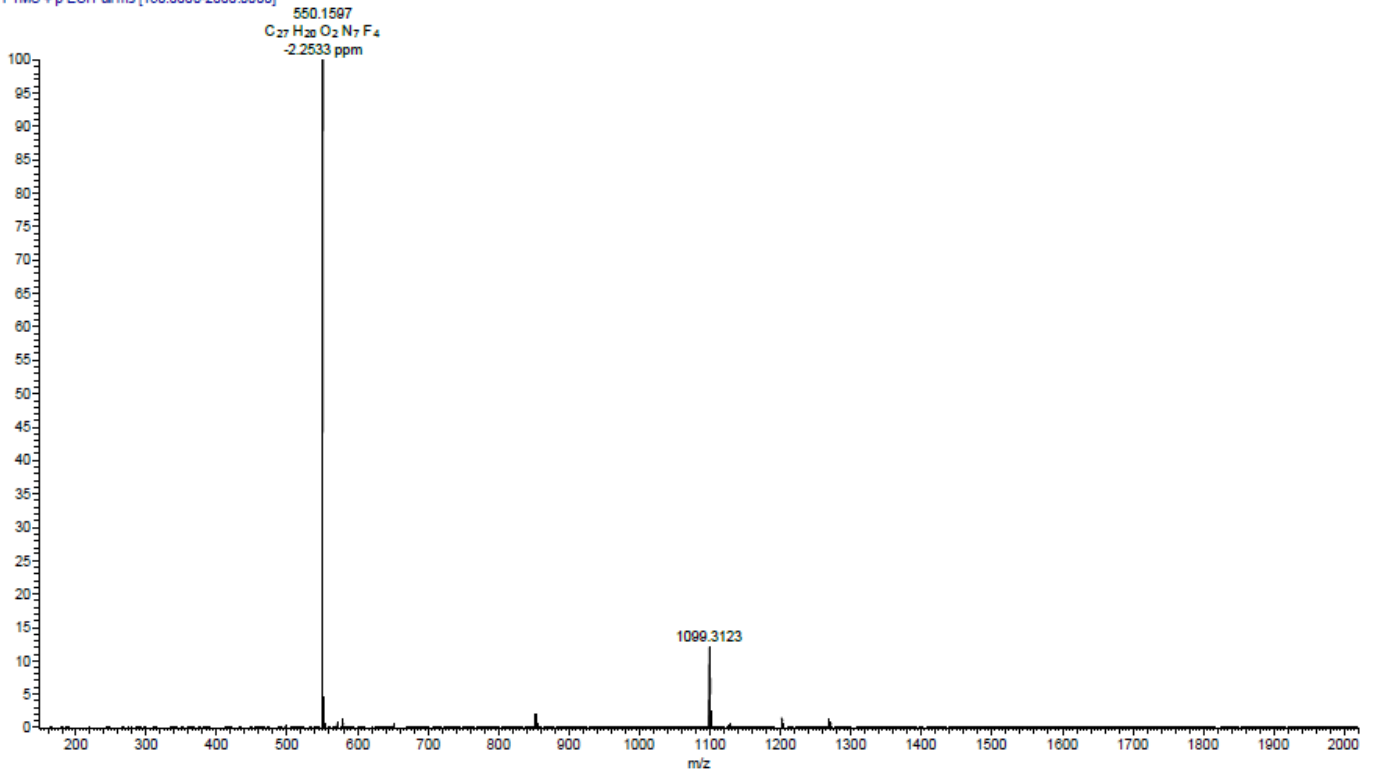

# Compound 30a

**title** PINI23-64-1  
**Method** AN\_ACID.M  
**Date acquired** 30-Oct-18, 16:29:06  
**FileName** Analysis\LCMS6\_1030\_090.D  
**Column** XSelect CSH C18 (50x2.1mm, 3.5µ) valve:3  
**Flow** 0.8 ml/min; Column temp: 35°C  
**Eluent A** 0.1% formic acid in acetonitrile  
**Eluent B** 0.1% formic acid in water  
**Gradient** t=0 min 5% A, t=3.5 min 98% A, t=6 min 98%A  
**Posttime** 2 min  
**Detection** DAD(210, 220 and 220-320nm)  
**Detection** PDA(210-320nm)  
**Detection** MSD (ESI pos/neg) mass range: 100 - 1000  
**Detection** ELSD gas temp: 40°C, flow 1.5 ml/min, gain 1

Integrals spectrum Chromatogram DAD A, Sig=270,100 Ref=off

| rt (min) | height | area    | area (%) |
|----------|--------|---------|----------|
| 2.53     | 0.8157 | 0.02801 | 0.16     |
| 2.76     | 1.220  | 0.02818 | 0.16     |
| 2.96     | 547.1  | 17.07   | 99.67    |

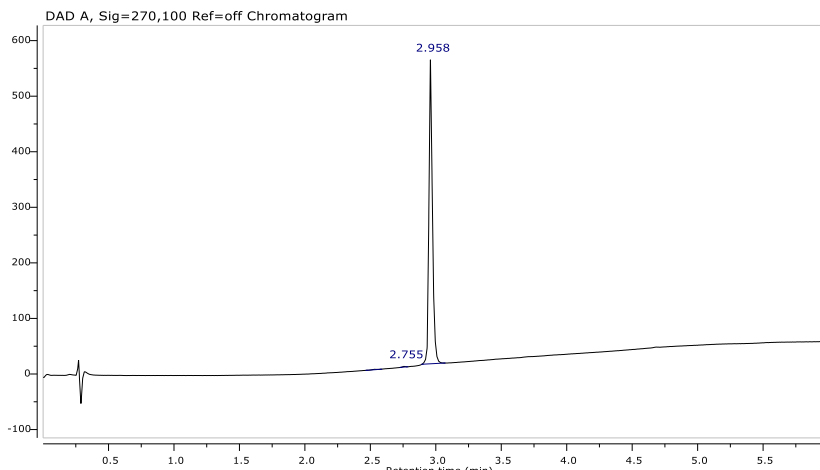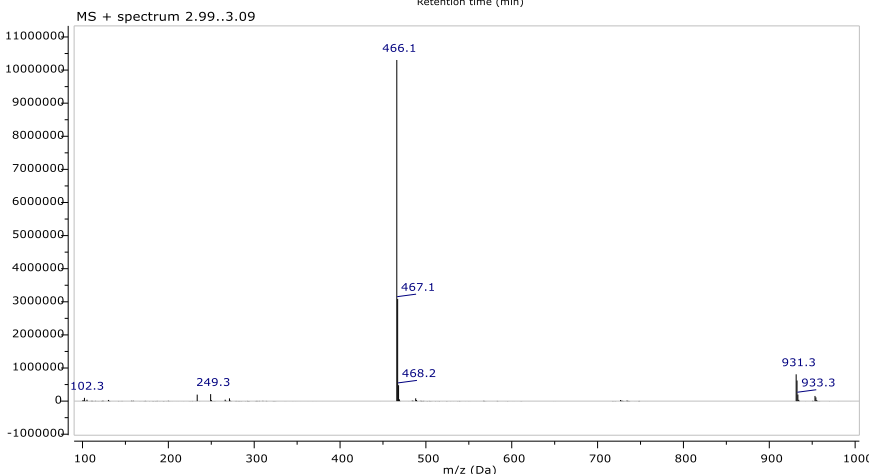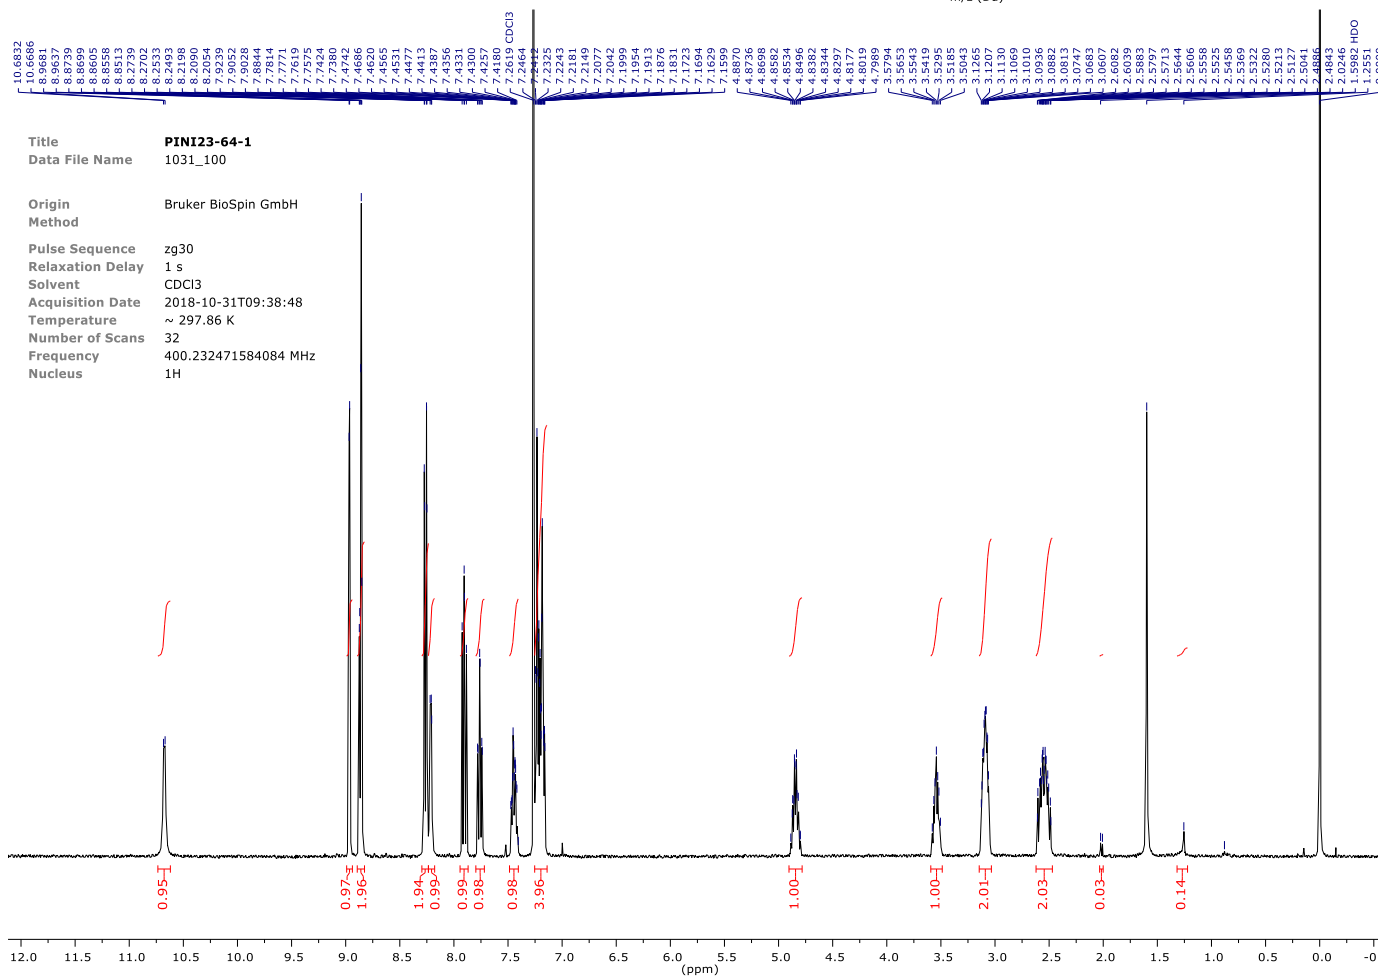

HRMS (m/z): C<sub>26</sub>H<sub>20</sub>N<sub>7</sub>O<sub>7</sub>F, [M+H]<sup>+</sup> Calc: 466.17861; found: 466.1775, Δppm -2.34

RT: 0.00 - 2.40

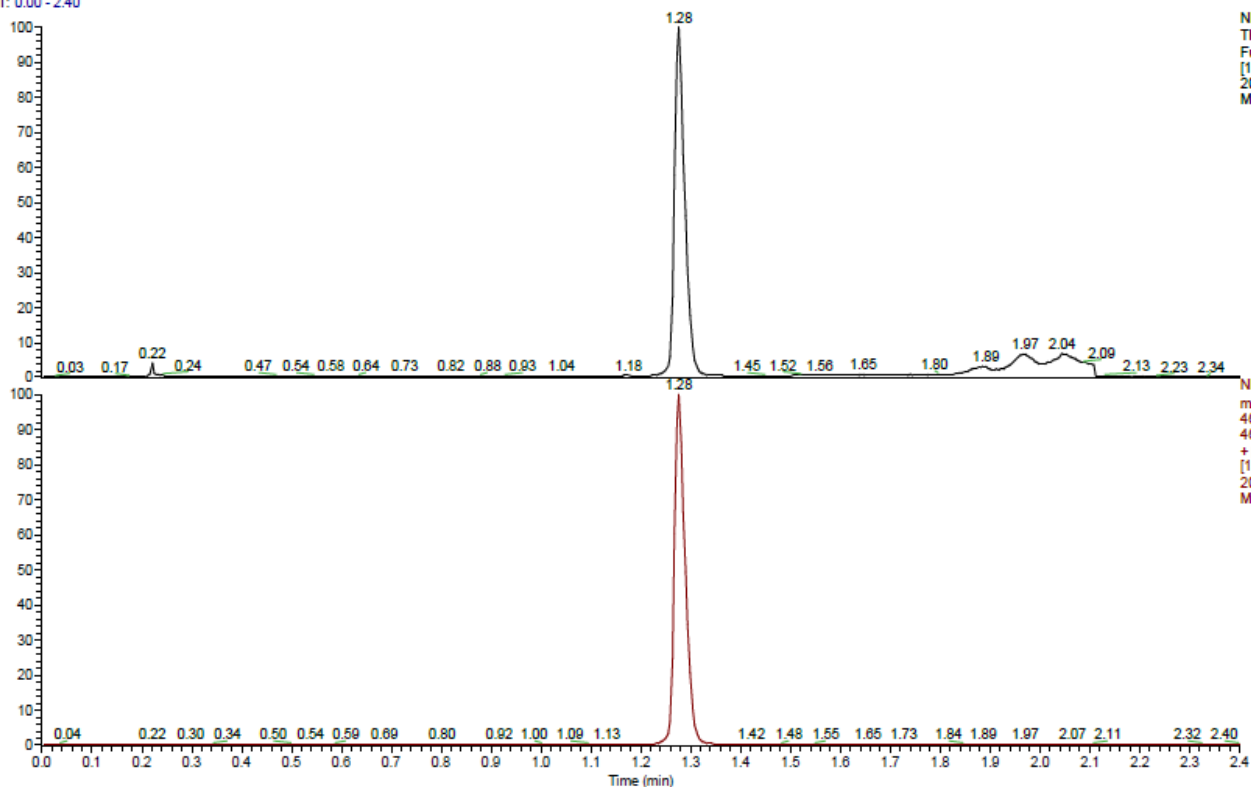

NL: 4.67E9  
TC F: FTMS + p ESI  
Full ms  
[150.0000-  
2000.0000] MS  
Mix-84F\_06

NL: 2.67E9  
m/z=  
466.67861-  
466.67861 F: FTMS  
+ p ESI Full ms  
[150.0000-  
2000.0000] MS  
Mix-84F\_06

Mix-84F\_06 #276-285 RT: 1.26-1.30 AV: 10 NL: 1.34E9  
T: FTMS + p ESI Full ms [150.0000-2000.0000]

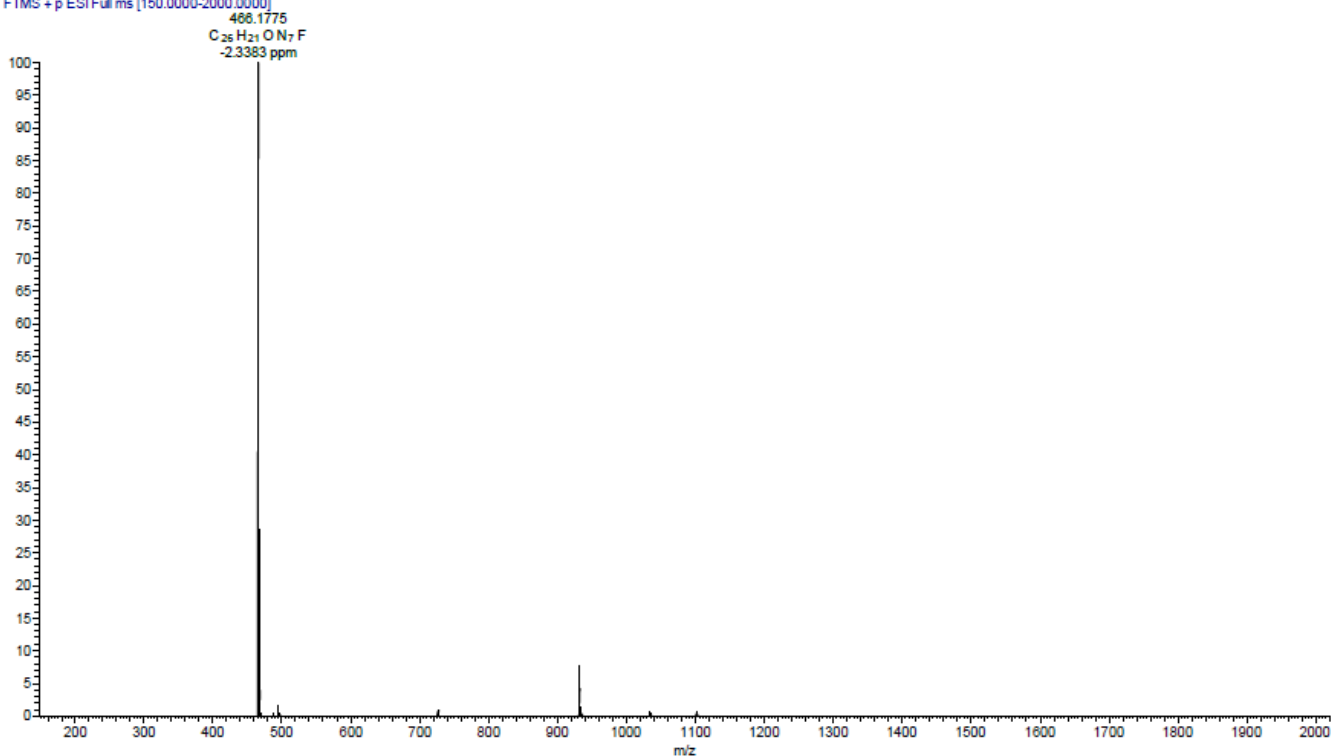

# Compound 30b

**title** PINI23-67-1  
**Method** AN\_ACID.M  
**Date acquired** 01-Nov-18, 16:45:23  
**FileName** Analysis\LCMS6\_1101\_129.D  
**Column** XSelect CSH C18 (50x2.1mm, 3.5μ) valve:3  
**Flow** 0.8 ml/min; Column temp: 35°C  
**Eluent A** 0.1% formic acid in acetonitrile  
**Eluent B** 0.1% formic acid in water  
**Gradient** t=0 min 5% A, t=3.5 min 98% A, t=6 min 98%A  
**Posttime** 2 min  
**Detection** DAD(210, 220 and 220-320nm)  
**Detection** PDA(210-320nm)  
**Detection** MSD (ESI pos/neg) mass range: 100 - 1000  
**Detection** ELSD gas temp: 40°C, flow 1.5 ml/min, gain 1

**Integrals spectrum** Chromatogram DAD A, Sig=270,100 Ref=off  

| rt (min) | height | area  | area (%) |
|----------|--------|-------|----------|
| 3.08     | 691.8  | 21.53 | 100.00   |

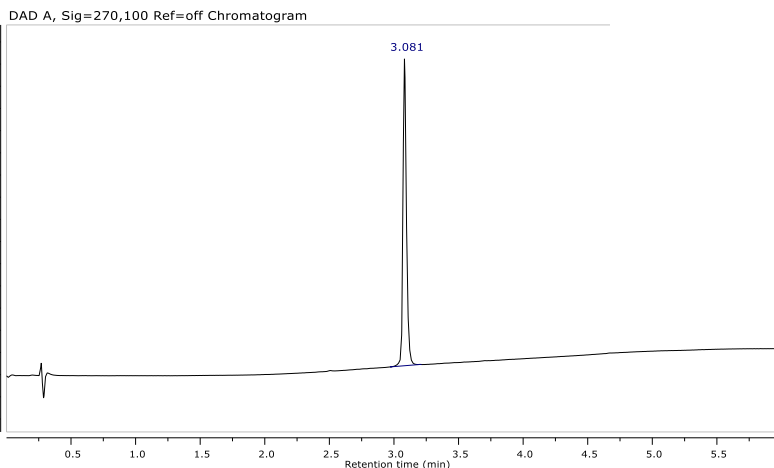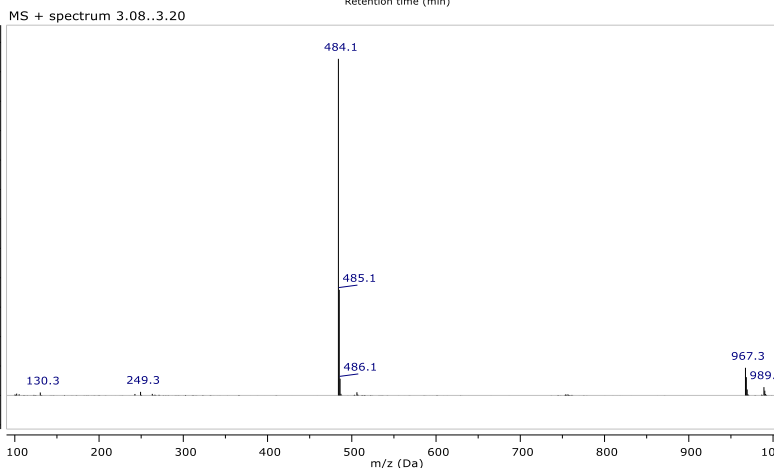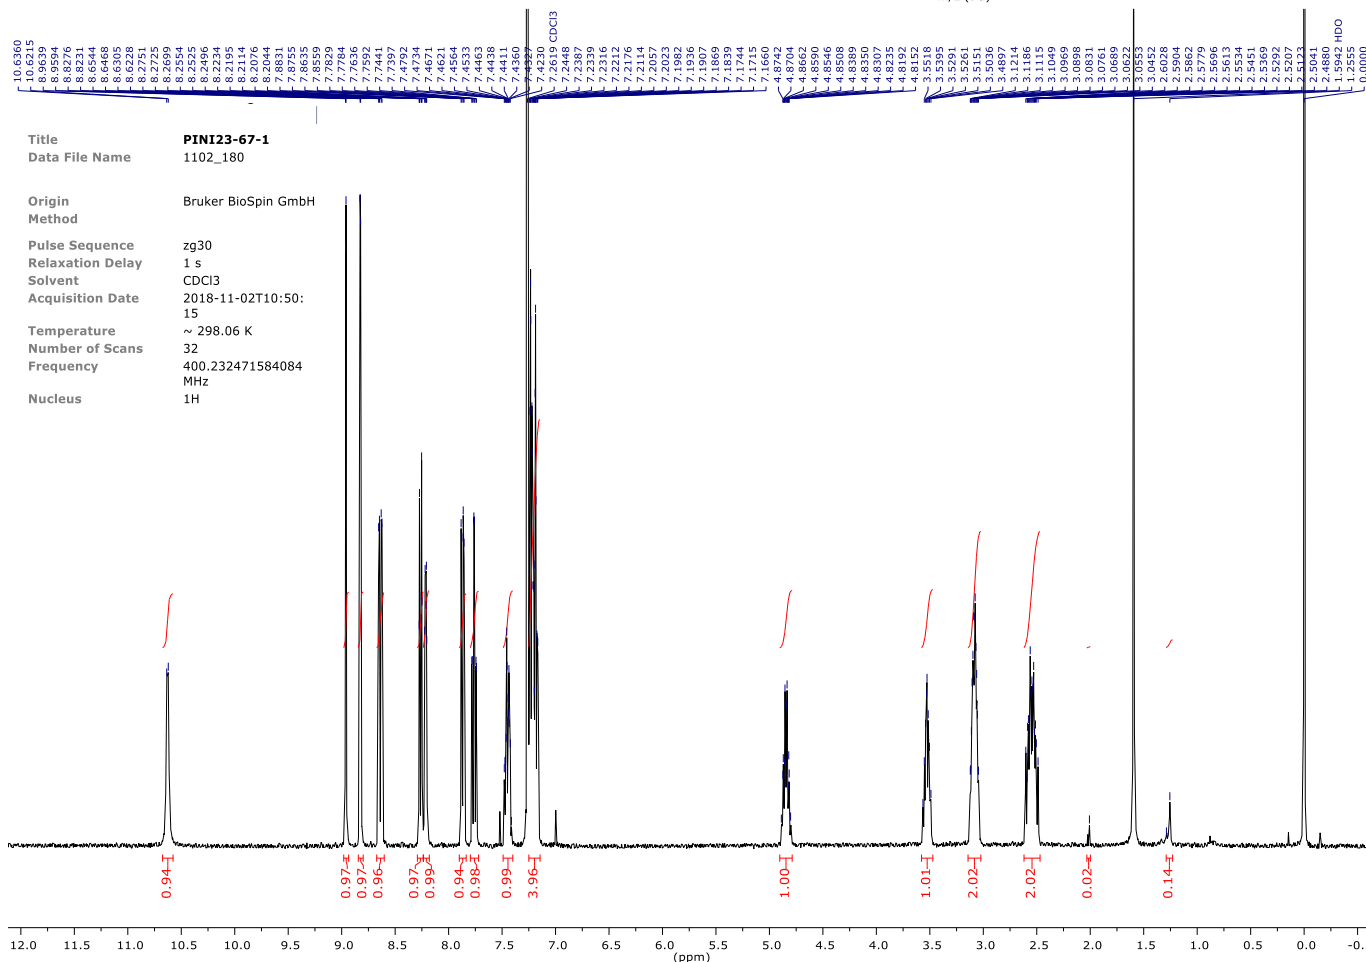

**Title** PINI23-67-1  
**Data File Name** 1102\_180  
**Origin** Bruker BioSpin GmbH  
**Method** zg30  
**Pulse Sequence** zg30  
**Relaxation Delay** 1 s  
**Solvent** CDCl3  
**Acquisition Date** 2018-11-02T10:50:15  
**Temperature** ~ 298.06 K  
**Number of Scans** 32  
**Frequency** 400.232471584084 MHz  
**Nucleus** 1H

HRMS (m/z): C<sub>26</sub>H<sub>19</sub>N<sub>7</sub>O<sub>7</sub>F<sub>2</sub>, [M+H]<sup>+</sup> Calc: 484.16919; found: 484.1684, Δppm -1.65

RT: 0.00 - 2.40

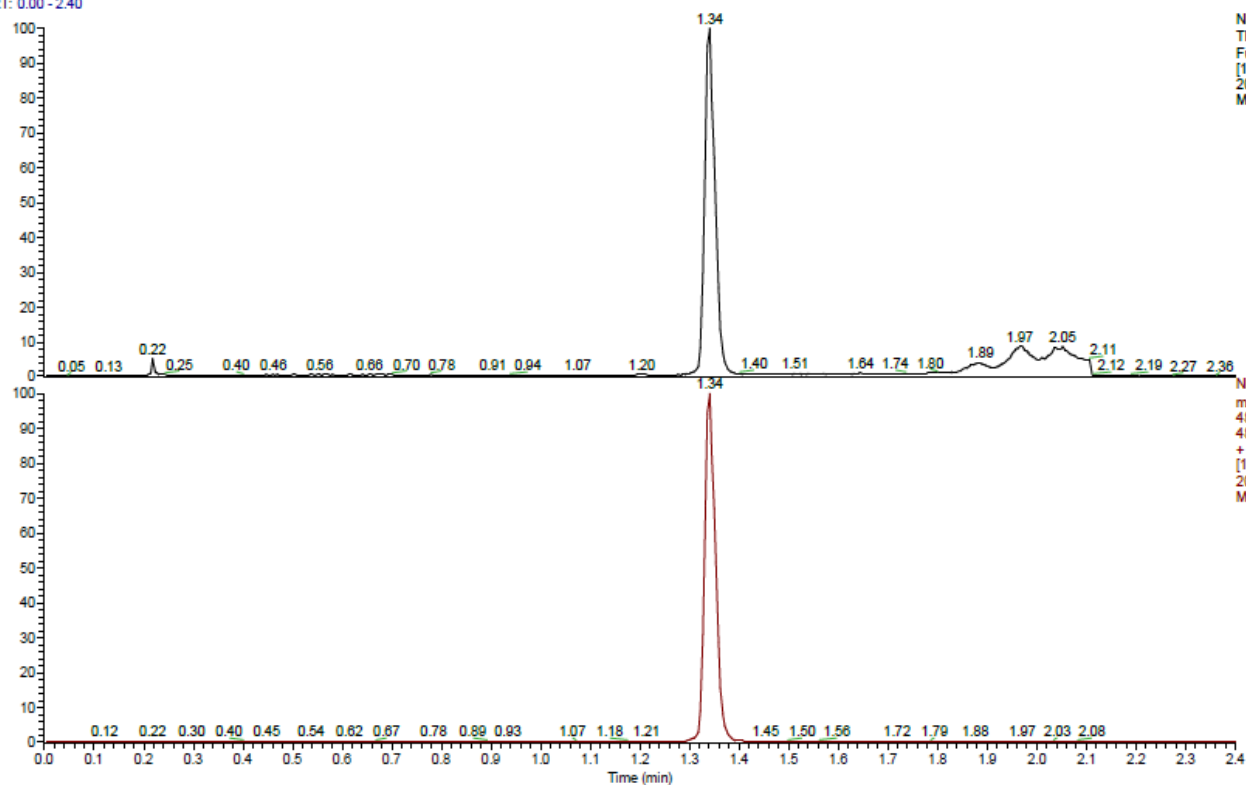

NL: 3.66E9  
TIC F: FTMS + p ESI  
Full ms  
[150.0000-  
2000.0000] MS  
Mix-84G\_18

NL: 2.11E9  
m/z=  
483.66919-  
484.66919 F: FTMS  
+ p ESI Full ms  
[150.0000-  
2000.0000] MS  
Mix-84G\_18

Mix-84G 18 #289-297 RT: 1.32-1.36 AV: 9 NL: 1.20E9  
T: FTMS + p ESI Full ms [150.0000-2000.0000]

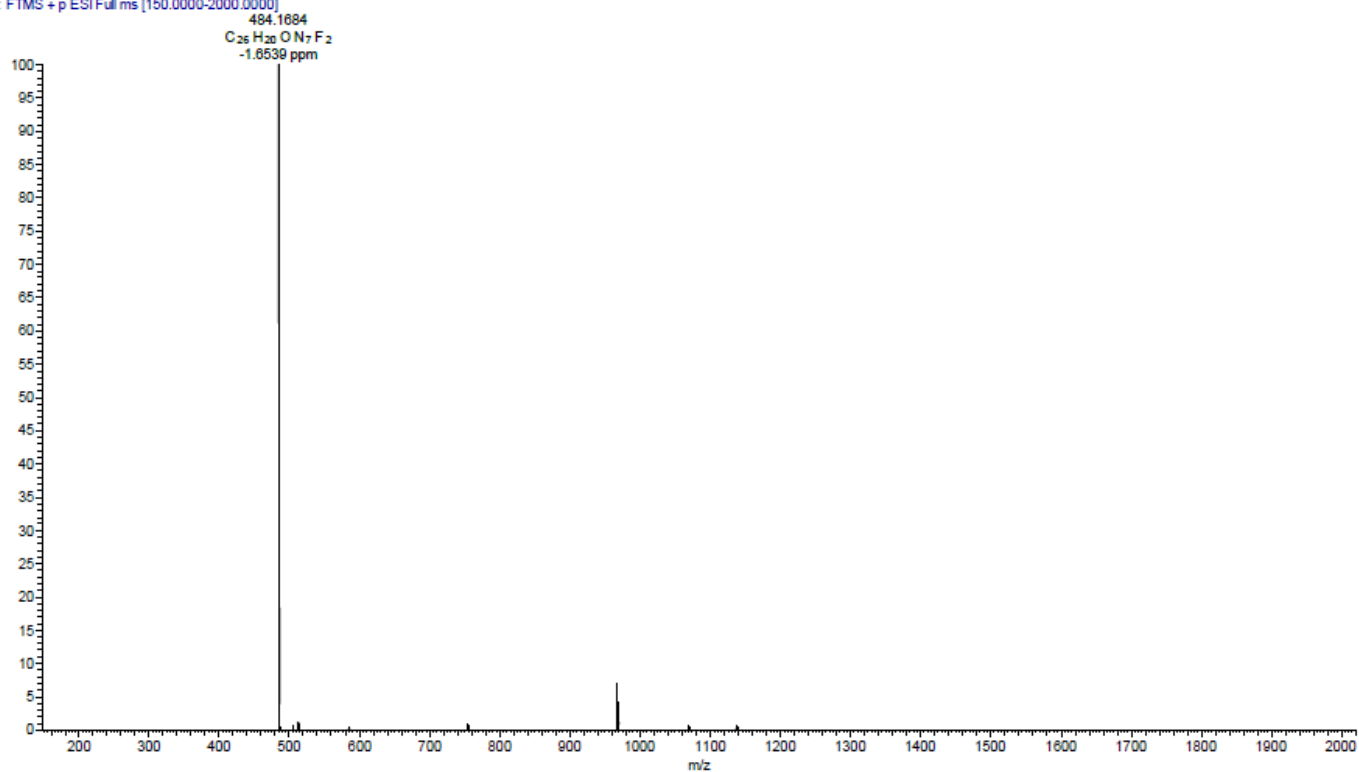



# Compound 31a

**title** PINI23-65-1  
**Method** AN\_ACID.M  
**Date acquired** 30-Oct-18, 16:37:28  
**FileName** Analysis\LCMS6\_1030\_091.D  
**Column** XSelect CSH C18 (50x2.1mm, 3.5μ) valve:3  
**Flow** 0.8 ml/min; Column temp: 35°C  
**Eluent A** 0.1% formic acid in acetonitrile  
**Eluent B** 0.1% formic acid in water  
**Gradient** t=0 min 5% A, t=3.5 min 98% A, t=6 min 98% A  
**Posttime** 2 min  
**Detection** DAD(210, 220 and 220-320nm)  
**Detection** PDA(210-320nm)  
**Detection** MSD (ESI pos/neg) mass range: 100 - 1000  
**Detection** ELSD gas temp: 40°C, flow 1.5 ml/min, gain 1

DAD A, Sig=270,100 Ref=off Chromatogram

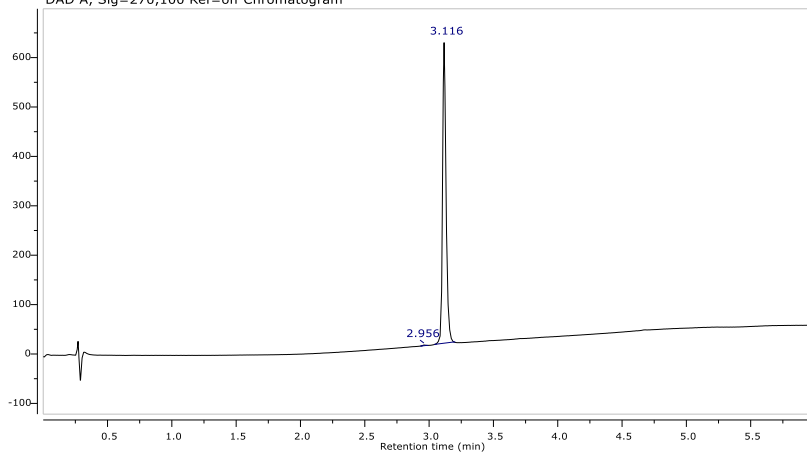

Integrals spectrum Chromatogram DAD A, Sig=270,100 Ref=off

| rt (min) | height | area    | area (%) |
|----------|--------|---------|----------|
| 2.96     | 1.353  | 0.03264 | 0.17     |
| 3.12     | 608.6  | 19.02   | 99.83    |

MS + spectrum 3.13..3.24

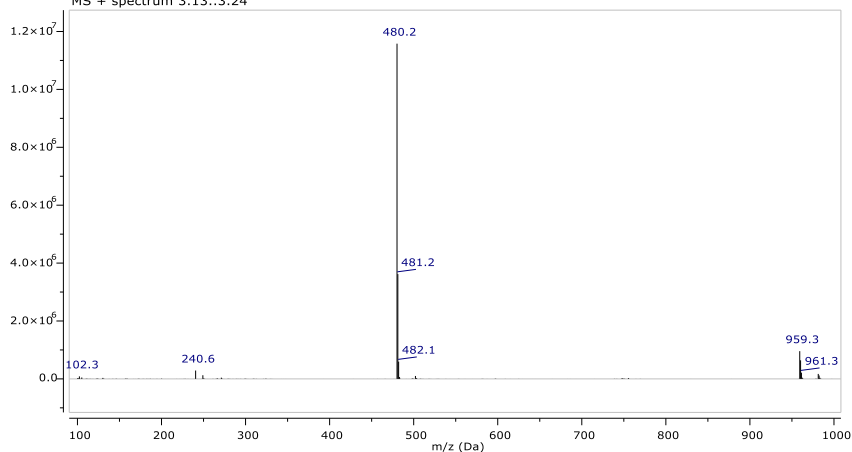

1.0.6829  
 1.0.6886  
 8.9925  
 8.9925  
 8.8749  
 8.8709  
 8.8667  
 8.8524  
 8.8524  
 8.2731  
 8.2692  
 8.2648  
 8.2483  
 8.0757  
 8.0563  
 7.9933  
 7.9925  
 7.9025  
 7.8840  
 7.6459  
 7.6665  
 7.6665  
 7.4701  
 7.4701  
 7.4632  
 7.4584  
 7.4584  
 7.4499  
 7.4428  
 7.4402  
 7.4402  
 7.4341  
 7.4341  
 7.4316  
 7.4278  
 7.4194  
 7.4194  
 7.2617  
 7.2469  
 7.2317  
 7.2298  
 7.2298  
 7.2106  
 7.2061  
 7.2031  
 7.1865  
 7.1802  
 7.1614  
 7.1585  
 7.0385  
 7.0385  
 4.8815  
 4.8694  
 4.8654  
 4.8654  
 4.8694  
 4.8455  
 4.8340  
 4.8303  
 4.8265  
 4.8188  
 4.8140  
 4.8101  
 4.7973  
 4.7973  
 3.5795  
 3.5795  
 3.5681  
 3.5573  
 3.5573  
 3.5542  
 3.5542  
 3.5401  
 3.5321  
 3.5186  
 3.5186  
 3.1127  
 3.1127  
 3.1193  
 3.1193  
 3.1116  
 3.1018  
 3.1018  
 3.0982  
 3.0982  
 3.0816  
 3.0816  
 3.0750  
 3.0674  
 3.0674  
 2.6037  
 2.6037  
 2.5928  
 2.5883  
 2.5883  
 2.5708  
 2.5708  
 2.5650  
 2.5650  
 2.5559  
 2.5509  
 2.5509  
 2.5422  
 2.5422  
 2.5334  
 2.5271  
 2.5271  
 2.5088  
 2.5088  
 2.5100  
 2.5100  
 2.5048  
 2.4943  
 2.4943  
 2.4597  
 2.4597  
 2.0074  
 2.0074  
 1.5933  
 1.5933  
 1.2551  
 1.2551  
 0.9766  
 0.9766  
 0.0000  
 0.0000  
 -0.0083

**Title** PINI23-65-1  
**Data File Name** 1031\_110  
**Origin** Bruker BioSpin GmbH  
**Method**  
**Pulse Sequence** zg30  
**Relaxation Delay** 1 s  
**Solvent** CDCl3  
**Acquisition Date** 2018-10-31T09:47:  
**24**  
**Temperature** ~ 298.06 K  
**Number of Scans** 32  
**Frequency** 400.232471584084  
**Mhz**  
**Nucleus** 1H

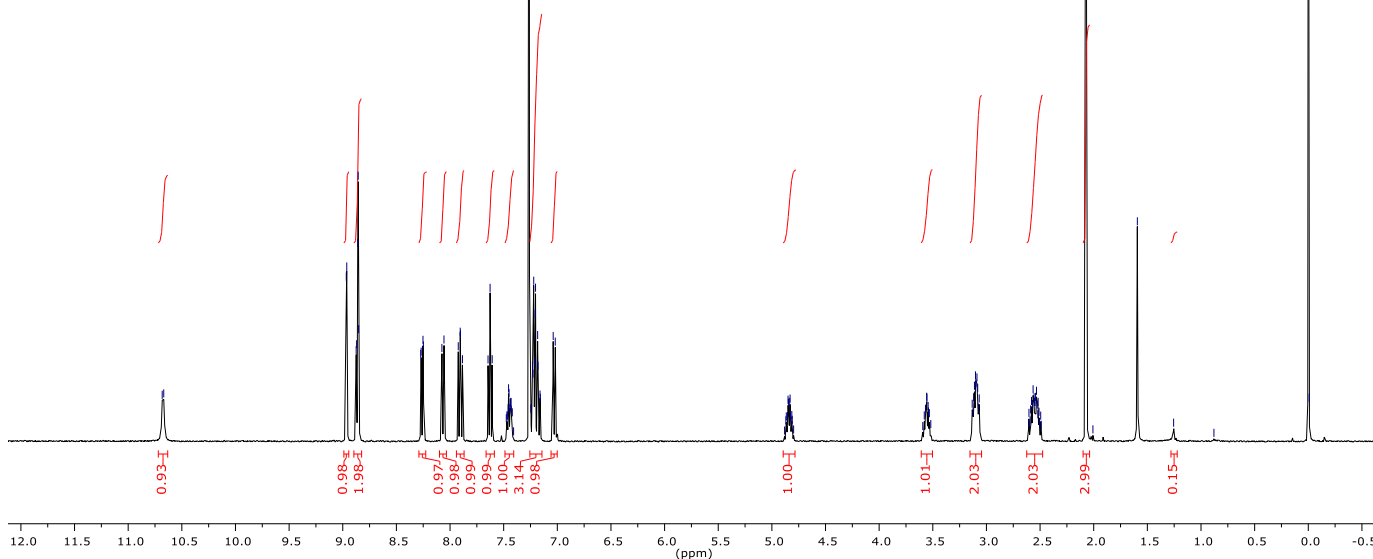

HRMS (m/z): C<sub>27</sub>H<sub>22</sub>N<sub>7</sub>O<sub>7</sub>F, [M+H]<sup>+</sup> Calc: 480.19426; found: 480.1934, Δppm -1.75

RT: 0.00 - 2.40

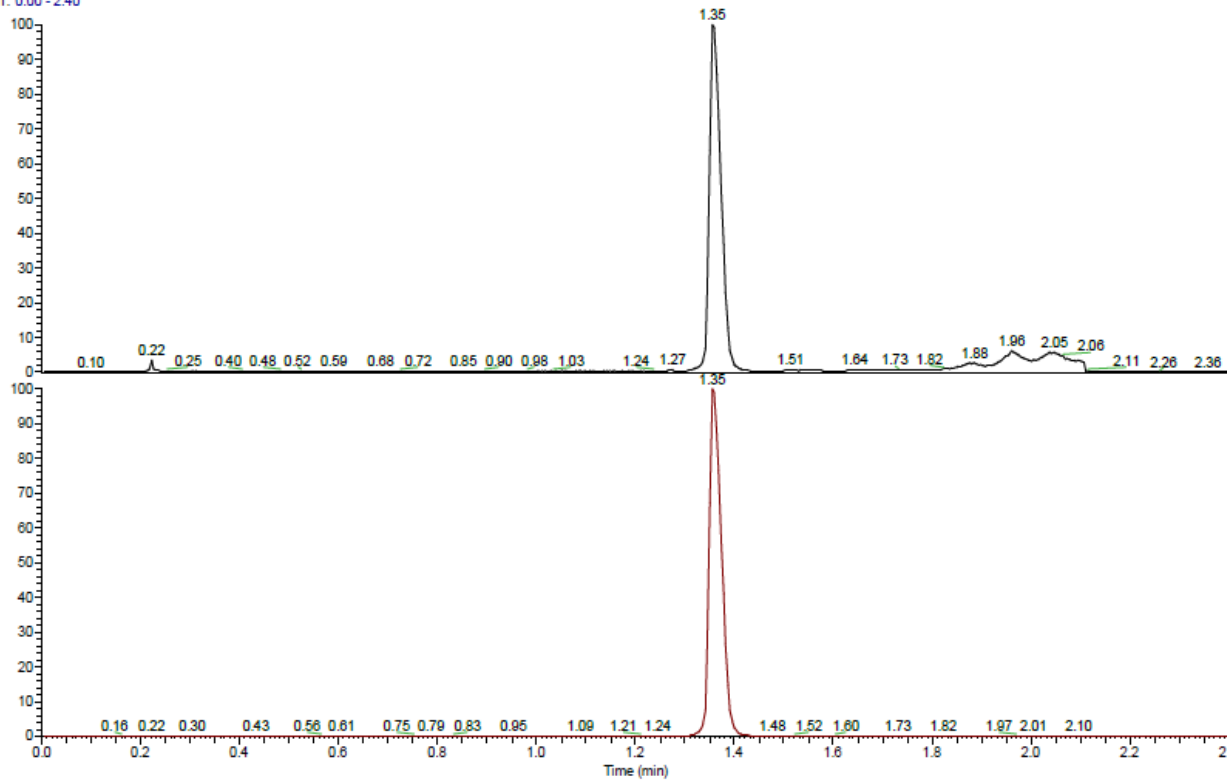

NL: 5.60E9  
TIC F: FTMS + p ESI  
Full ms  
[150.0000-  
2000.0000] MS  
Mix-85F\_20

NL: 3.25E9  
m/z=  
479.09426-  
480.09426 F: FTMS  
+ p ESI Full ms  
[150.0000-  
2000.0000] MS  
Mix-85F\_20

Mix-85F 20 #293-302 RT: 1.34-1.38 AV: 10 NL: 1.75E9  
T: FTMS + p ESI Full ms [150.0000-2000.0000]

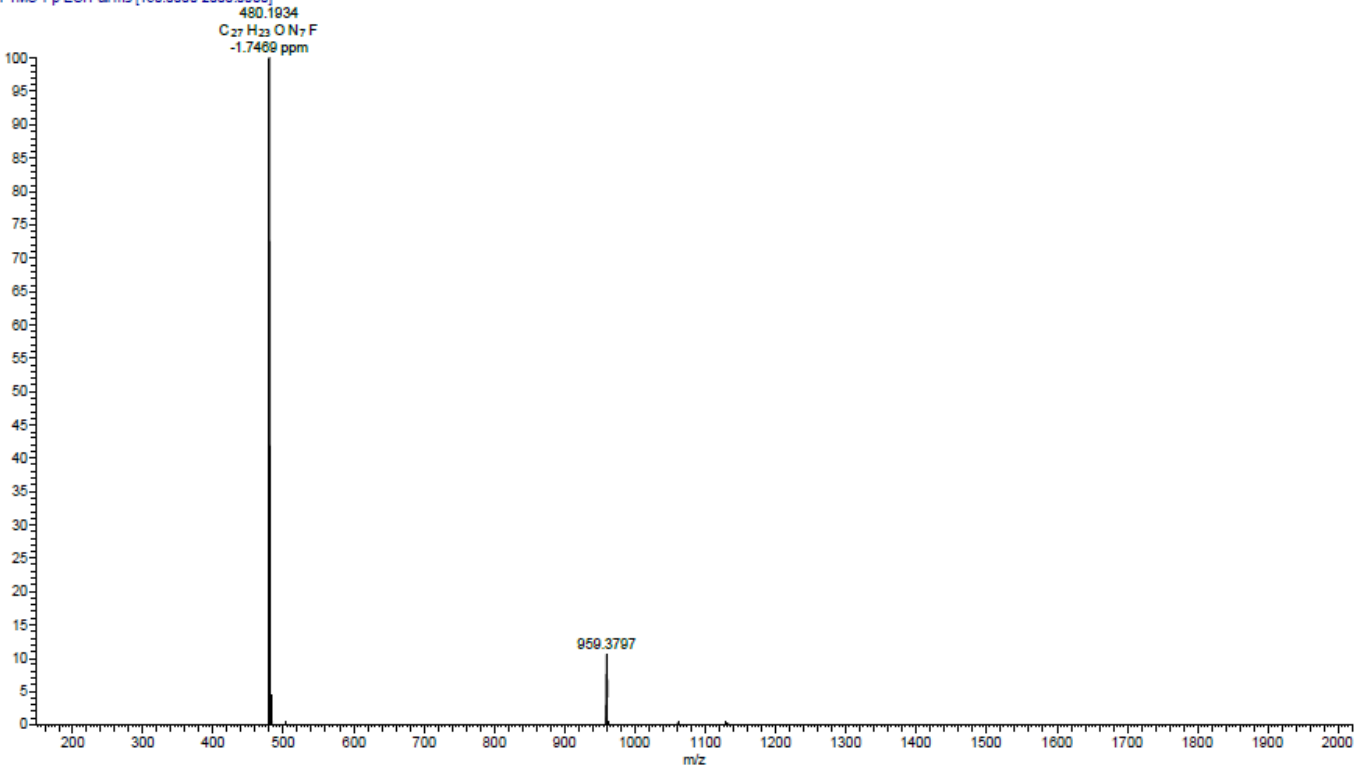

# Compound 31b

**title** PINI23-68-1  
**Method** AN\_ACID.M  
**Date acquired** 01-Nov-18, 16:53:45  
**FileName** Analysis/LCMS6\_1101\_130.D  
**Column** XSelect CSH C18 (50x2.1mm, 3.5µ) valve:3  
**Flow** 0.8 ml/min; Column temp: 35°C  
**Eluent A** 0.1% formic acid in acetonitrile  
**Eluent B** 0.1% formic acid in water  
**Gradient** t=0 min 5% A, t=3.5 min 98% A, t=6 min 98%A  
**Posttime** 2 min  
**Detection** DAD(210, 220 and 220-320nm)  
**Detection** PDA(210-320nm)  
**Detection** MSD (ESI pos/neg) mass range: 100 - 1000  
**Detection** ELSD gas temp: 40°C, flow 1.5 ml/min, gain 1

**Integrals spectrum** Chromatogram DAD A, Sig=270,100 Ref=off  

| rt (min) | height | area    | area (%) |
|----------|--------|---------|----------|
| 3.08     | 2.177  | 0.05783 | 0.32     |
| 3.24     | 583.1  | 18.02   | 99.68    |

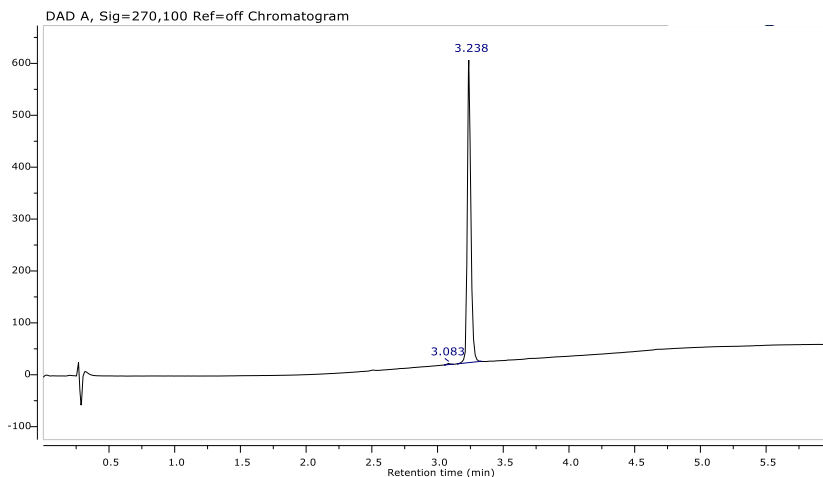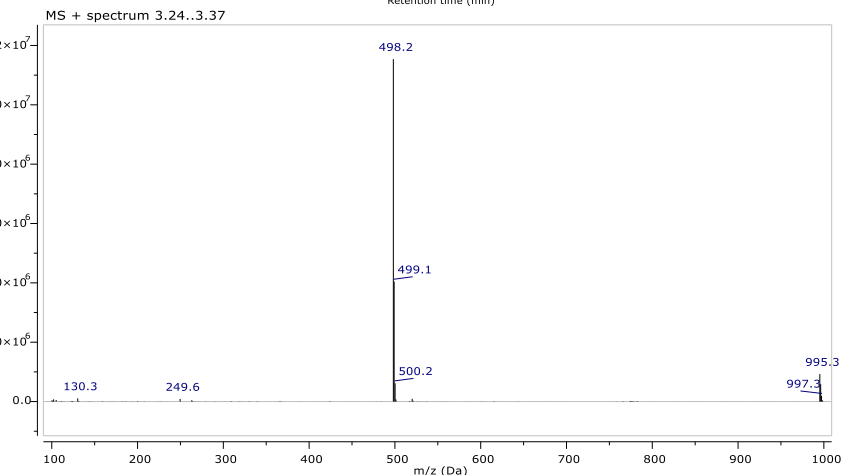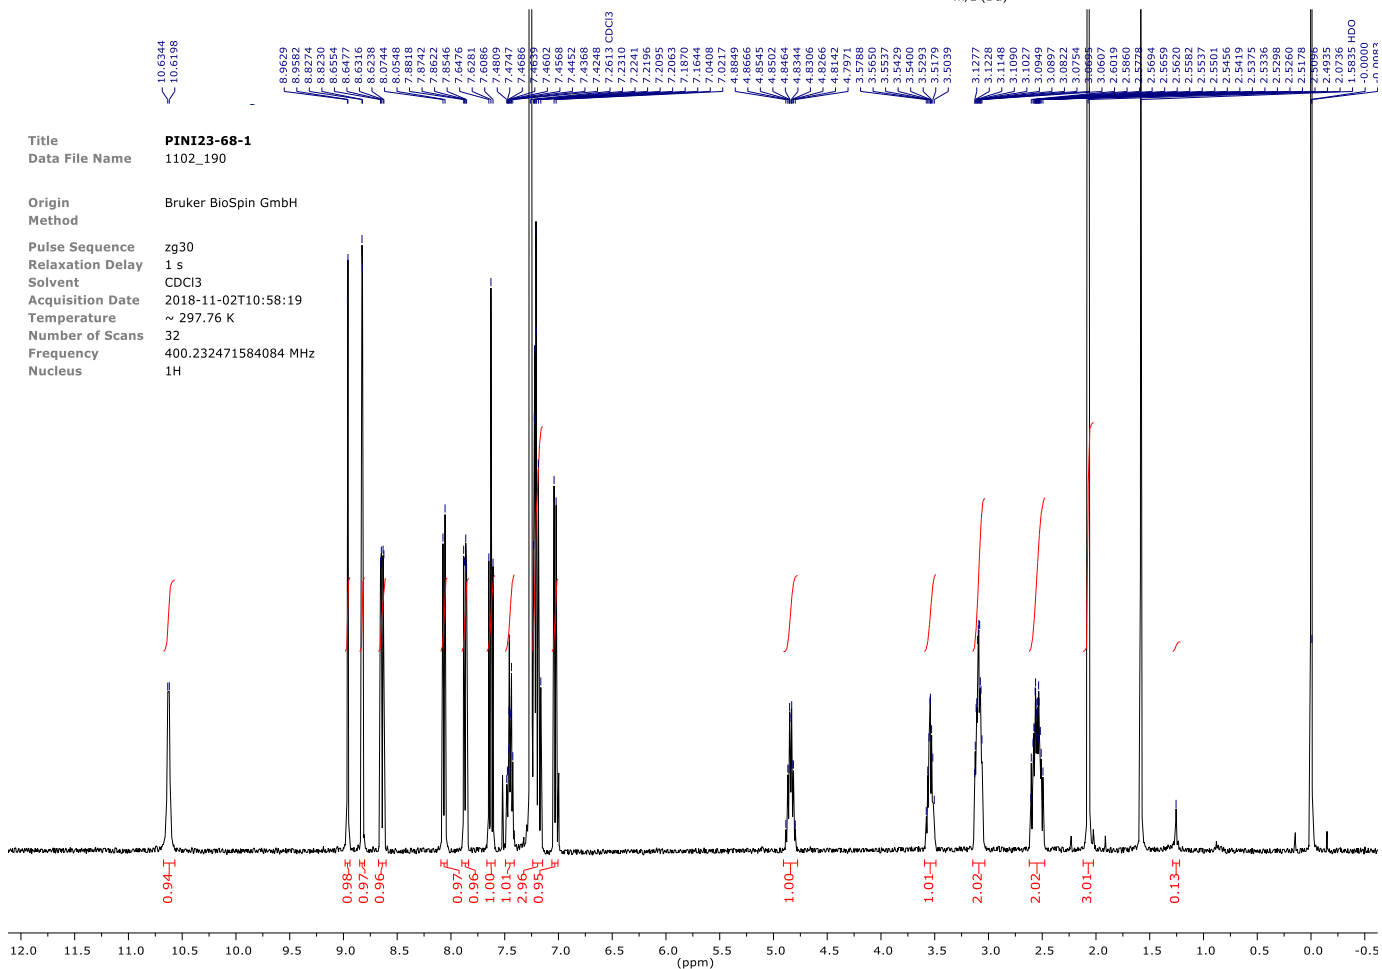

**Title** PINI23-68-1  
**Data File Name** 1102\_190  
**Origin** Bruker BioSpin GmbH  
**Method**  
**Pulse Sequence** zg30  
**Relaxation Delay** 1 s  
**Solvent** CDCl3  
**Acquisition Date** 2018-11-02T10:58:19  
**Temperature** ~ 297.76 K  
**Number of Scans** 32  
**Frequency** 400.232471584084 MHz  
**Nucleus** 1H

HRMS (m/z): C<sub>27</sub>H<sub>21</sub>N<sub>7</sub>O<sub>7</sub>F<sub>2</sub>, [M+H]<sup>+</sup> Calc: 498.18484; found: 498.1838, Δppm -2.11

RT: 0.00 - 2.40

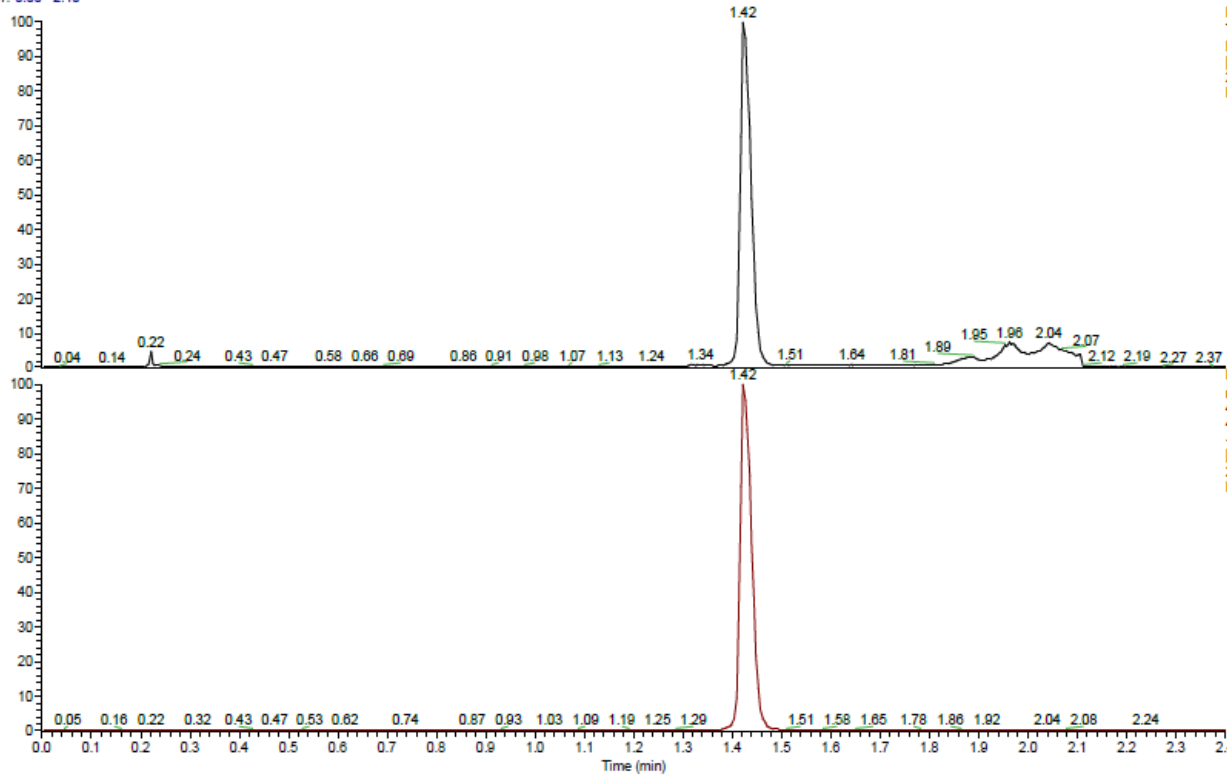

NL: 4.58E9  
TIC F: FTMS + p ESI  
Full ms  
[150.0000-  
2000.0000] MS  
Mix-85G\_22

NL: 2.61E9  
m/z=  
497.68484-  
498.68484 F: FTMS  
+ p ESI Full ms  
[150.0000-  
2000.0000] MS  
Mix-85G\_22

Mix-85G 22 #309-318 RT: 1.41-1.45 AV: 10 NL: 1.38E9  
T: FTMS + p ESI Full ms [150.0000-2000.0000]

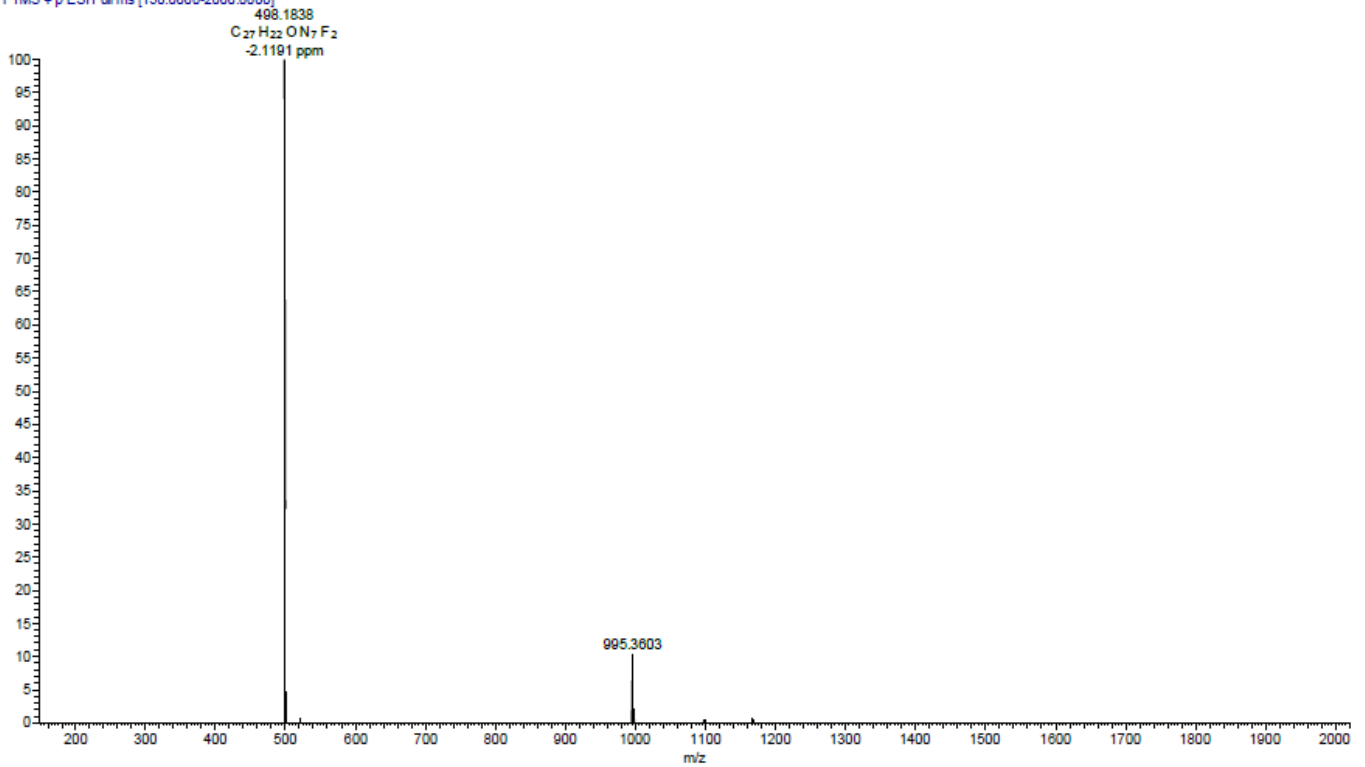

498.1838  
C<sub>27</sub>H<sub>22</sub>ON<sub>7</sub>F<sub>2</sub>  
-2.1191 ppm

995.3603

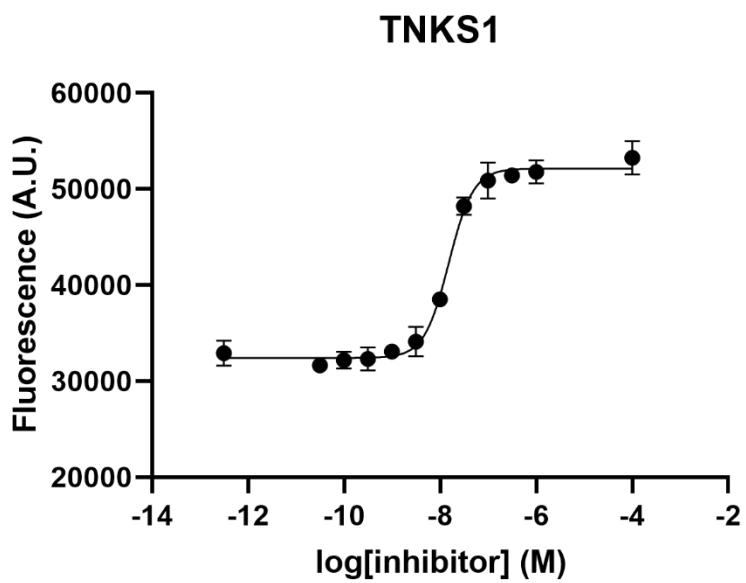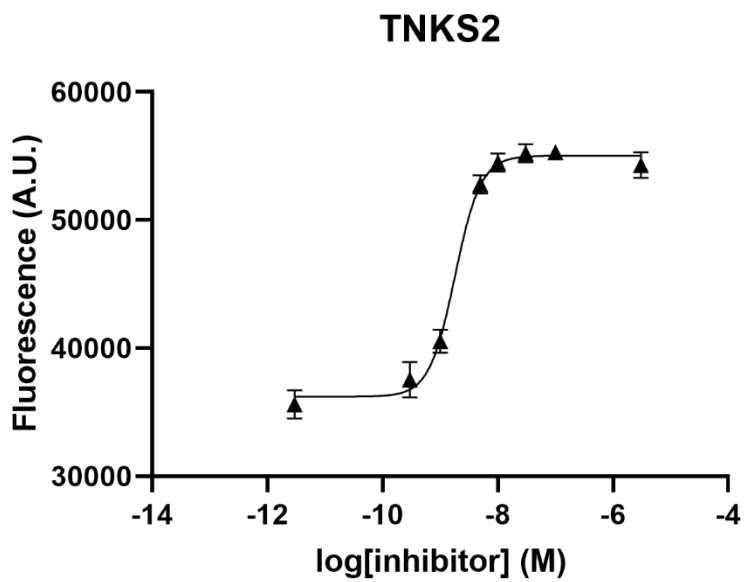

**Figure S-1.** Dose response curves for compound **24** (OM-153) in the biochemical assay of TNKS1/2 respectively with error bars showing the SD (n=3).

| PARP                        | 1 (OM-1700)              | 24 (OM-153)                |
|-----------------------------|--------------------------|----------------------------|
| PARP1                       | 29 $\mu$ M               | > 100 $\mu$ M              |
| PARP2                       | 26 $\mu$ M               | > 100 $\mu$ M              |
| PARP3                       | 75 $\mu$ M               | > 100 $\mu$ M              |
| PARP4                       | > 100 $\mu$ M            | > 100 $\mu$ M              |
| PARP5a (TNKS1) <sup>b</sup> | 125 nM (6.90 $\pm$ 0.05) | 12.2 nM (7.914 $\pm$ 0.03) |
| PARP5b (TNKS2) <sup>b</sup> | 14 nM (7.85 $\pm$ 0.04)  | 1.6 nM (8.79 $\pm$ 0.085)  |
| PARP10                      | >> 10 $\mu$ M            | >> 10 $\mu$ M              |
| PARP12 <sup>a</sup>         | >> 10 $\mu$ M            | >> 10 $\mu$ M              |
| PARP14                      | > 100 $\mu$ M            | > 100 $\mu$ M              |
| PARP15 <sup>a</sup>         | >> 10 $\mu$ M            | >> 10 $\mu$ M              |

<sup>a</sup> concentration limited by DMSO tolerance

<sup>b</sup> between brackets the pIC<sub>50</sub>  $\pm$  SEM is given

> under 50% inhibition

>> no inhibition detected

**Table S-1.** IC<sub>50</sub> data of PARPs

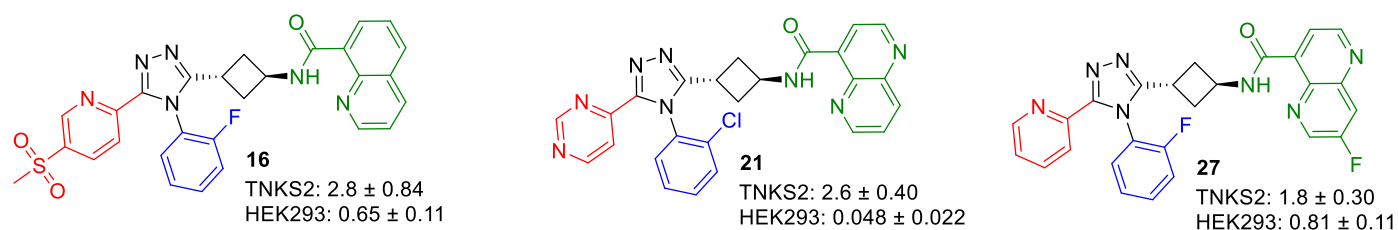

**Chart S-1.** Selected compounds from our previous paper<sup>1</sup>

|                                       |                                               |
|---------------------------------------|-----------------------------------------------|
| <b>Compound</b>                       | <b>24 (OM-153)</b>                            |
| PDB code                              | 7O6X                                          |
| Beam line                             | DLS I04                                       |
| Wavelength (Å)                        | 0.97949                                       |
| Space group                           | P2 <sub>1</sub> 2 <sub>1</sub> 2 <sub>1</sub> |
| Cell dimensions a, b, c (Å)           | 41.39,<br>76.43,<br>147.73                    |
| Resolution (Å)                        | 41.4 - 2.2 (2.279 - 2.2)                      |
| R <sub>merge</sub>                    | 0.2496 (1.482)                                |
| I / σ                                 | 8.19 (1.33)                                   |
| Completeness (%)                      | 99.74 (99.50)                                 |
| Redundancy                            | 13.4 (13.6)                                   |
| <b>Refinement</b>                     |                                               |
| R <sub>work</sub> / R <sub>free</sub> | 0.2157 / 0.2543                               |
| <b>B-factors</b>                      |                                               |
| Protein                               | 41.5                                          |
| Inhibitor                             | 37.6                                          |
| <b>R.m.s.d.</b>                       |                                               |
| Bond lengths (Å)                      | 0.013                                         |
| Bond angles (°)                       | 1.63                                          |
| <b>Ramachandran plot (%)</b>          |                                               |
| Favored regions                       | 99.48                                         |
| Additionally allowed regions          | 0.52                                          |

**Table S-2.** Data collection and refinement statistics for the cocrystal structure of TNKS2 in complex with compound **24** (OM-153).

## References

- (1) Waaler, J.; Leenders, R. G. G.; Sowa, S. T.; Alam Brinch, S.; Lycke, M.; Nieczypor, P.; Aertssen, S.; Murthy, S.; Galera-Prat, A.; Damen, E.; Wegert, A.; Nazaré, M.; Lehtiö, L.; Krauss, S. Preclinical Lead Optimization of a 1,2,4-Triazole Based Tankyrase Inhibitor. *J. Med. Chem.* **2020**, *63* (13), 6834–6846.
